# Supplementary material for: Causal Relationship between White Matter Tracts and Psychiatric Disorders: A Mendelian Randomization Study
Source: Research Square preprint supplement (doi:10.21203/rs.3.rs-6505046/v1), 2025-05-08
Supplement: Supplementary file 1 [file 0f1d6ce48e94b5e14e05cd53.xlsx]

## Sheet: Cotents
These Supplementary tables document the data generated at each step of our analysis, with different color blocks used to illustrate the data filtering process and criteria.
Table	Contents
Table S3	GWAS summary-level data of white matter microstructures.
Table S4	GWAS summary-level data of psychiatric disorders.
Table S5	IVs in forward MR (before confounder selection)
Table S6	IVs in reverse MR
Table S7	IVs associated gwas traits in opengwas in forward MR
Table S8	IVs associated gwas traits in opengwas in reverse MR
Table S9	Confounders' selection of IVs
Table S10	IVs in forward MR without confounders
Table S11	Outliers detected by MR-PRESSO in forward MR analyses.
Table S12	Outliers detected by MR-PRESSO in reverse MR analyses.
Table S13	Information of IVs for all exposure-outcome pairs in forward MR analyses.
Table S14	Information of IVs for all exposure-outcome pairs in reverse MR analyses.
Table S15	Forward MR analysis results.
Table S16	Rreverse MR analysis results.
Table S17	Forward MR analysis results (before confounder fixing).
Table S18	Comparing the IVW results before and after confounder filtering.
Table S19	Comparing the IVW results before and after outlier filtering.
Table S20	Significant forward and reverse MR results after adjusting and pleiotropy tests
Table S21	Multiple comparison of significant MR results.
Table S22	The summary and interpretation of significant MR results.
Table S23	MVMR analysis results.
Table S24	Replication MR of BD, AUD, SCZ and ADHD in FinnGen R11
Table S25	Significant MR results both in GWAS summary-level data(FDR_P < 5e-2) and replication data (P < 5e-2)

## Sheet: 3
GWAS summary-level data of white matter microstructures.
Reference: Zhao et al (2020) Common genetic variation influencing human white matter microstructure. https://doi.org/10.1101/2020.05.23.112409
Sample size n=33,292 (UKB British cohort)
Number of reported SNPs p~9,023,710 (Chromosomes 1-22)
WM tracts (21) + whole brain average (22 in total)
Abbreviation	Full Name
ACR	Anterior corona radiata
ALIC	Anterior limb of internal capsule
BCC	Body of corpus callosum
CGC	Cingulum (cingulate gyrus)
CGH	Cingulum (hippocampus)
CST	Corticospinal tract
EC	External capsule
FX	Fornix (column and body of fornix)
FXST	Fornix (cres) / Stria terminalis (can not be resolved with current resolution)
GCC	Genu of corpus callosum
IFO	Inferior fronto-occipital fasciculus
PCR	Posterior corona radiata
PLIC	Posterior limb of internal capsule
PTR	Posterior thalamic radiation (include optic radiation)
RLIC	Retrolenticular part of internal capsule
SCC	Splenium of corpus callosum
SCR	Superior corona radiata
SFO	Superior fronto-occipital fasciculus (could be a part of anterior internal capsule)
SLF	Superior longitudinal fasciculus
SS	Sagittal stratum (include inferior longitidinal fasciculus and inferior fronto-occipital fasciculus)
UNC	Uncinate fasciculus
Average	Whole brain average across all tracts
DTI parameters (5)
DTI parameter	Full name	Description
FA	fractional anisotropy	a summary measure of WM integrity
MD	mean diffusivities	magnitude of absolute directionality
AD	axial diffusivities	eigenvalue of the principal diusion direction
RD	radial diffusivities	average of the eigenvalues of the two secondary directions
MO	mode of anisotropy	third moment of the tensor
DTI (21 WM tracts * 5 Parameters + 5 global = 110)
Abbreviation	Fullname
FA	fractional anisotropy (a summary measure of WM integrity)
MD	mean diffusivity (magnitude of absolute directionality)
AD	axial diffusivity (eigenvalue of the principal diusion direction)
RD	radial diffusivity (average of the eigenvalues of the two secondary directions)
MO	mode of anisotropy third moment of the tensor
ACR_FA	mean FA of anterior corona radiata
ALIC_FA	mean FA of anterior limb of internal capsule
Average_FA	average FA across all the 21 white matter tracts
BCC_FA	mean FA of body of corpus callosum
CGC_FA	mean FA of cingulum (cingulate gyrus)
CGH_FA	mean FA of cingulum (hippocampus)
CST_FA	mean FA of corticospinal tract
EC_FA	mean FA of external capsule
FX_FA	mean FA of fornix (column and body of fornix)
FXST_FA	mean FA of fornix-stria terminalis
GCC_FA	mean FA of genu of corpus callosum
IFO_FA	mean FA of inferior fronto-occipital fasciculus
PCR_FA	mean FA of posterior corona radiata
PLIC_FA	mean FA of posterior limb of internal capsule
PTR_FA	mean FA of posterior thalamic radiation (include optic radiation)
RLIC_FA	mean FA of retrolenticular part of internal capsule
SCC_FA	mean FA of splenium of corpus callosum
SCR_FA	mean FA of superior corona radiata
SFO_FA	mean FA of sperior fronto-occipital fasciculus (could be a part of anterior internal capsule)
SLF_FA	mean FA of superior longitudinal fasciculus
SS_FA	mean FA of sagittal stratum (include inferior longitidinal fasciculus and inferior fronto-occipital fasciculus)
UNC_FA	mean AD of uncinate fasciculus
ACR_AD	mean AD of anterior corona radiata
ALIC_AD	mean AD of anterior limb of internal capsule
Average_AD	average AD across all the 21 white matter tracts
BCC_AD	mean AD of body of corpus callosum
CGC_AD	mean AD of cingulum (cingulate gyrus)
CGH_AD	mean AD of cingulum (hippocampus)
CST_AD	mean AD of corticospinal tract
EC_AD	mean AD of external capsule
FX_AD	mean AD of fornix (column and body of fornix)
FXST_AD	mean AD of fornix-stria terminalis
GCC_AD	mean AD of genu of corpus callosum
IFO_AD	mean AD of inferior fronto-occipital fasciculus
PCR_AD	mean AD of posterior corona radiata
PLIC_AD	mean AD of posterior limb of internal capsule
PTR_AD	mean AD of posterior thalamic radiation (include optic radiation)
RLIC_AD	mean AD of retrolenticular part of internal capsule
SCC_AD	mean AD of splenium of corpus callosum
SCR_AD	mean AD of superior corona radiata
SFO_AD	mean AD of sperior fronto-occipital fasciculus (could be a part of anterior internal capsule)
SLF_AD	mean AD of superior longitudinal fasciculus
SS_AD	mean AD of sagittal stratum (include inferior longitidinal fasciculus and inferior fronto-occipital fasciculus)
UNC_AD	mean AD of uncinate fasciculus
ACR_MD	mean MD of anterior corona radiata
ALIC_MD	mean MD of anterior limb of internal capsule
Average_MD	average MD across all the 21 white matter tracts
BCC_MD	mean MD of body of corpus callosum
CGC_MD	mean MD of cingulum (cingulate gyrus)
CGH_MD	mean MD of cingulum (hippocampus)
CST_MD	mean MD of corticospinal tract
EC_MD	mean MD of external capsule
FX_MD	mean MD of fornix (column and body of fornix)
FXST_MD	mean MD of fornix-stria terminalis
GCC_MD	mean MD of genu of corpus callosum
IFO_MD	mean MD of inferior fronto-occipital fasciculus
PCR_MD	mean MD of posterior corona radiata
PLIC_MD	mean MD of posterior limb of internal capsule
PTR_MD	mean MD of posterior thalamic radiation (include optic radiation)
RLIC_MD	mean MD of retrolenticular part of internal capsule
SCC_MD	mean MD of splenium of corpus callosum
SCR_MD	mean MD of superior corona radiata
SFO_MD	mean MD of sperior fronto-occipital fasciculus (could be a part of anterior internal capsule)
SLF_MD	mean MD of superior longitudinal fasciculus
SS_MD	mean MD of sagittal stratum (include inferior longitidinal fasciculus and inferior fronto-occipital fasciculus)
UNC_MD	mean MD of uncinate fasciculus
ACR_MO	mean MO of anterior corona radiata
ALIC_MO	mean MO of anterior limb of internal capsule
Average_MO	average MO across all the 21 white matter tracts
BCC_MO	mean MO of body of corpus callosum
CGC_MO	mean MO of cingulum (cingulate gyrus)
CGH_MO	mean MO of cingulum (hippocampus)
CST_MO	mean MO of corticospinal tract
EC_MO	mean MO of external capsule
FX_MO	mean MO of fornix (column and body of fornix)
FXST_MO	mean MO of fornix-stria terminalis
GCC_MO	mean MO of genu of corpus callosum
IFO_MO	mean MO of inferior fronto-occipital fasciculus
PCR_MO	mean MO of posterior corona radiata
PLIC_MO	mean MO of posterior limb of internal capsule
PTR_MO	mean MO of posterior thalamic radiation (include optic radiation)
RLIC_MO	mean MO of retrolenticular part of internal capsule
SCC_MO	mean MO of splenium of corpus callosum
SCR_MO	mean MO of superior corona radiata
SFO_MO	mean MO of sperior fronto-occipital fasciculus (could be a part of anterior internal capsule)
SLF_MO	mean MO of superior longitudinal fasciculus
SS_MO	mean MO of sagittal stratum (include inferior longitidinal fasciculus and inferior fronto-occipital fasciculus)
UNC_MO	mean MO of uncinate fasciculus
ACR_RD	mean RD of anterior corona radiata
ALIC_RD	mean RD of anterior limb of internal capsule
Average_RD	average MO across all the 21 white matter tracts
BCC_RD	mean RD of body of corpus callosum
CGC_RD	mean RD of cingulum (cingulate gyrus)
CGH_RD	mean RD of cingulum (hippocampus)
CST_RD	mean RD of corticospinal tract
EC_RD	mean RD of external capsule
FX_RD	mean RD of fornix (column and body of fornix)
FXST_RD	mean RD of fornix-stria terminalis
GCC_RD	mean RD of genu of corpus callosum
IFO_RD	mean RD of inferior fronto-occipital fasciculus
PCR_RD	mean RD of posterior corona radiata
PLIC_RD	mean RD of posterior limb of internal capsule
PTR_RD	mean RD of posterior thalamic radiation (include optic radiation)
RLIC_RD	mean RD of retrolenticular part of internal capsule
SCC_RD	mean RD of splenium of corpus callosum
SCR_RD	mean RD of superior corona radiata
SFO_RD	mean RD of sperior fronto-occipital fasciculus (could be a part of anterior internal capsule)
SLF_RD	mean RD of superior longitudinal fasciculus
SS_RD	mean RD of sagittal stratum (include inferior longitidinal fasciculus and inferior fronto-occipital fasciculus)
UNC_RD	mean RD of uncinate fasciculus

## Sheet: 4
GWAS summary-level data of Psychiatric Disorders (Bidirecional MR)
Disease	Source	Sample (cases)	Sample (control)	Sample (Total)	Ancestry	Pubmed ID	Link
Alcohol use disorder		113325	639923	753248	EUR	38062264	https://eastus1-mediap.svc.ms/transform/zip?cs=fFNQTw
	iPSYCH	3141	18970	22111	EUR
	MVP	80028	368113	448141	EUR
	UKB	-	-	-	EUR
	FinnGen	8866	209926	218792	EUR
	QIMR	10785	10848	21633	EUR
	PGC	9938	30992	40930	EUR
	Yale-Penn 3	567	1074	1641	EUR
Attention deficit hyperactivity disorder		38691	186843	225534	EUR	36702997	https://pgc.unc.edu/for-researchers/download-results/
	iPSYCH	-	-	-	EUR
	deCODE	-	-	-	EUR
	PGC	-	-	-	EUR
Autism disorder		18381	27969	46350	EUR	30804558	https://pgc.unc.edu/for-researchers/download-results/
	iPSYCH	13076	22664	35740	EUR
	PGC	5305	5305	10610	EUR
	FinnGen	-	-	-	EUR
Bipolar disorder	PGC	41917	371549	413466	US + EUR	34002096	https://pgc.unc.edu/for-researchers/download-results/
Cannabis use disorder		42281	843744	886025	EUR	37985822	https://hugesumstats.yalespace.org/dl/dbGAP_EUR_CanMVP_META.gz
	PGC, deCODE	14522	298941	313463	EUR
	MVP	22260	423587	445847	EUR
	iPSYCH	4733	95657	100390	EUR
	MGB	456	24088	24544	EUR
	Yale-Penn 3	310	1471	1781	EUR
Major depression		184270	529044	713314	EUR	37464041	https://ipsych.dk/fileadmin/ipsych.dk/Downloads/daner_MDDwoBP_20201001_2015iR15iex_HRC_MDDwoBP_iPSYCH2015i_Wray_FinnGen_MVPaf_2_HRC_MAF01.gz
	iPSYCH	29158	38142	67300	EUR
	FinnGen	28098	228817	256915	EUR
	MVP	83810	166405	250215	EUR
	PGC	43204	95680	138884	EUR
Opioid Use Disorder	MVP, PGC, iPSYCH, FinnGen, Partners Biobank, BioVU, and Yale-Penn 3	15251	554186	569437	EUR	35879402	Requested from author
Post-traumatic stress disorder	PGC	137136	1085746	1222882	EUR	38637617	https://figshare.com/ndownloader/articles/26349322/versions/1
Schizophrenia	PGC	52017	75889	127906	EUR	35396580
Tourette syndrome	PGC	4819	9488	14307	EUR	30818990	https://pgc.unc.edu/for-researchers/download-results/
GWAS summary-level data of Psychiatric Disorders (Replication)
Disease	Source	Sample (cases)	Sample (control)	Sample (Total)	Ancestry	Pubmed ID	Link
Alcohol use disorder	FinnGen	18695	435038	453733	EUR		https://storage.googleapis.com/finngen-public-data-r11/summary_stats/finngen_R11_AUD.gz
Attention deficit hyperactivity disorder	FinnGen	3702	445327	449029	EUR
Bipolar disorder	FinnGen	8209	394756	402965	EUR		https://storage.googleapis.com/finngen-public-data-r11/summary_stats/finngen_R11_F5_BIPO.gz
Schizophrenia	FinnGen	6933	439144	446077	EUR		https://storage.googleapis.com/finngen-public-data-r11/summary_stats/finngen_R11_F5_SCHZPHR.gz
Abbreviations: deCODE: deCODE Genetics; EUR: European; iPSYCH: The Lundbeck Foundation Integrative Psychiatric Research; MGB: Mass General Brigham Biobank; MVP: the Million Veteran Program; PGC: Psychiatric Genomics Consortium; QIMR: QIMR Berghofer Medical Research Institute; UKB: UK Biobank.

## Sheet: 5
IVs in forward MR(before confounder selection)
CHR	SNP	POS	Effect_allele	Other_allele	N	EAF	Beta	SE	P	Exposure
3	rs6442409	13835087	T	C	31459	0.342621	-0.0583526	0.00806766	4.73e-13	ACR_AD
3	rs16857992	183395135	T	C	32061	0.0947101	-0.0849725	0.0129754	5.8e-11	ACR_AD
5	rs11747963	64525440	G	A	31992	0.307686	-0.0546808	0.00823995	3.22e-11	ACR_AD
5	rs11746859	82770558	G	A	32113	0.461028	0.0623443	0.0076352	3.2e-16	ACR_AD
5	rs13164785	82861400	G	T	32127	0.191148	0.129021	0.00959185	3.03e-41	ACR_AD
7	rs111219357	518187	C	A	29706	0.405137	-0.0440453	0.00801433	3.89e-08	ACR_AD
9	rs10119113	12765117	T	G	32269	0.178174	0.0549945	0.00990327	2.81e-08	ACR_AD
9	rs1572030	86571611	A	G	32340	0.463312	-0.0443617	0.00759148	5.11e-09	ACR_AD
10	rs201581170	105682344	A	T	32287	0.152972	0.0604109	0.0104848	8.32e-09	ACR_AD
11	rs2071020	10478228	T	C	32154	0.455838	0.0497252	0.00761904	6.74e-11	ACR_AD
11	rs2303865	44636833	A	G	32296	0.131858	0.0809748	0.0111504	3.81e-13	ACR_AD
11	rs10765771	95521044	G	A	32338	0.421408	0.0424616	0.00767451	3.15e-08	ACR_AD
17	rs7216587	42947314	C	T	32340	0.161039	-0.0845543	0.0103076	2.34e-16	ACR_AD
17	rs9899380	43173131	C	G	31764	0.425371	-0.048763	0.00773611	2.91e-10	ACR_AD
17	rs55938136	43798360	G	A	32332	0.221978	0.0527329	0.00907378	6.19e-09	ACR_AD
2	rs76122535	203664929	G	C	32202	0.13274	0.0871367	0.0107026	3.9e-16	ACR_FA
2	rs7590302	217330901	C	T	32361	0.306063	0.0554022	0.00787007	1.93e-12	ACR_FA
3	rs142003765	39479611	G	A	32433	0.0188697	-0.1617	0.0266583	1.31e-09	ACR_FA
4	rs3959520	54196106	A	G	30101	0.363094	0.0519241	0.00780284	2.84e-11	ACR_FA
5	rs11746859	82770558	G	A	32338	0.461346	-0.0464211	0.00730709	2.11e-10	ACR_FA
5	rs7733216	82857870	C	T	32058	0.198406	-0.0945992	0.00910987	2.92e-25	ACR_FA
5	rs3776089	139727260	G	A	32255	0.261587	0.0476076	0.00827794	8.86e-09	ACR_FA
6	rs3129171	29155749	A	G	32567	0.242991	0.061203	0.00842051	3.64e-13	ACR_FA
8	rs55705857	130645692	G	A	32567	0.0556545	-0.133736	0.0157731	2.28e-17	ACR_FA
10	rs7893954	104318966	G	A	32567	0.287024	-0.0504353	0.00801672	3.15e-10	ACR_FA
10	rs10886016	118668311	A	G	32228	0.250745	0.0585584	0.00837957	2.78e-12	ACR_FA
11	rs2303865	44636833	A	G	32523	0.131707	-0.0632814	0.0106747	3.06e-09	ACR_FA
12	rs2004088	112981327	C	G	32374	0.0953234	0.0727576	0.0124121	4.58e-09	ACR_FA
13	rs11618612	110362475	T	C	32567	0.260125	0.04875	0.00824879	3.42e-09	ACR_FA
17	rs199526	44847707	C	G	32384	0.219244	-0.0553322	0.00874636	2.51e-10	ACR_FA
17	rs62086884	65994400	C	G	32237	0.198111	-0.0669833	0.00912818	2.17e-13	ACR_FA
19	rs11673604	18540988	C	T	32240	0.361445	-0.0552895	0.00758284	3.07e-13	ACR_FA
19	rs179570	36251326	G	A	32567	0.468726	0.0400275	0.00723332	3.13e-08	ACR_FA
22	rs2413493	38448295	C	G	32077	0.404838	-0.0543325	0.00738809	1.92e-13	ACR_FA
2	rs1864439	218616633	C	T	31403	0.0995446	0.0664853	0.0121366	4.3e-08	ACR_MD
3	rs6442411	13836296	T	C	31979	0.396041	-0.0496047	0.0073675	1.66e-11	ACR_MD
3	rs71318332	183354008	A	G	32306	0.160868	-0.068429	0.00977373	2.54e-12	ACR_MD
4	rs4385132	54210482	T	A	31980	0.350172	-0.0543135	0.00755836	6.68e-13	ACR_MD
4	rs35588958	121655414	G	T	31503	0.257071	-0.0470626	0.00837721	1.93e-08	ACR_MD
5	rs11747963	64525440	G	A	31969	0.307642	-0.046158	0.00783904	3.9e-09	ACR_MD
5	rs1847037	81900820	T	C	31870	0.293693	0.0440043	0.00796465	3.3e-08	ACR_MD
5	rs11746859	82770558	G	A	32090	0.460985	0.0666235	0.00726342	4.62e-20	ACR_MD
5	rs17205972	82859065	T	G	32271	0.1933	0.14258	0.0090621	8.9e-56	ACR_MD
5	rs4150221	139719991	C	T	32258	0.265872	-0.0485216	0.00814423	2.56e-09	ACR_MD
6	rs760804	29171039	T	C	32316	0.226683	-0.0572685	0.00858942	2.6e-11	ACR_MD
6	rs6921229	112148293	T	C	32158	0.138488	-0.0593033	0.0103871	1.13e-08	ACR_MD
7	rs1800814	540741	A	G	31961	0.483808	-0.0500452	0.0072286	4.41e-12	ACR_MD
8	rs16895163	122356886	T	C	31602	0.260316	0.0462901	0.00832919	2.74e-08	ACR_MD
8	rs55705857	130645692	G	A	32316	0.0555762	0.113903	0.0156933	3.93e-13	ACR_MD
8	rs7016860	145000221	A	G	32277	0.424497	-0.0484039	0.00726586	2.7e-11	ACR_MD
9	rs62565779	86574938	G	A	32059	0.284366	0.0443153	0.00800084	3.05e-08	ACR_MD
9	rs201911236	111749466	A	G	31189	0.0416493	-0.102274	0.0183442	2.47e-08	ACR_MD
10	rs3910909	49844458	T	C	31956	0.486513	0.0454016	0.00724647	3.72e-10	ACR_MD
10	rs10883931	105623955	T	C	32179	0.423133	0.0486212	0.00730184	2.76e-11	ACR_MD
11	rs7124615	186604	T	C	30619	0.108135	-0.0725705	0.0119012	1.08e-09	ACR_MD
11	rs2303865	44636833	A	G	32272	0.131848	0.0895655	0.0106087	3.1e-17	ACR_MD
11	rs10765771	95521044	G	A	32314	0.421458	0.0468551	0.00730041	1.38e-10	ACR_MD
12	rs73096828	51165885	A	G	32065	0.20039	-0.0504067	0.00902498	2.33e-08	ACR_MD
17	rs113882147	42901884	C	T	32256	0.157428	-0.0879931	0.00990348	6.39e-19	ACR_MD
17	rs7502890	43152675	G	A	32198	0.464346	0.0517624	0.00721534	7.29e-13	ACR_MD
17	rs61572747	43460891	G	A	31057	0.258138	0.0475535	0.00836857	1.33e-08	ACR_MD
17	rs55938136	43798360	G	A	32308	0.221911	0.0587414	0.00863443	1.02e-11	ACR_MD
17	rs62086903	66016006	C	T	31553	0.226666	0.0510869	0.0086707	3.82e-09	ACR_MD
22	rs6006426	30669883	G	A	32316	0.464104	0.0449021	0.00722138	5.04e-10	ACR_MD
22	rs5997939	31677130	C	G	32279	0.289925	0.0475476	0.00792627	1.99e-09	ACR_MD
22	rs1004764	38474852	G	A	32161	0.378657	0.0506868	0.00742901	8.93e-12	ACR_MD
2	rs6725887	203745885	C	T	32348	0.127334	0.0661971	0.0116556	1.35e-08	ACR_MO
3	rs28665038	66048906	A	T	32151	0.30548	-0.0465068	0.00846502	3.93e-08	ACR_MO
4	rs62289349	15554219	C	T	32018	0.0360735	0.118457	0.0208981	1.44e-08	ACR_MO
7	rs4721980	2750234	T	C	30221	0.209738	-0.0563124	0.00990365	1.3e-08	ACR_MO
10	rs10886016	118668311	A	G	32010	0.250843	0.051354	0.00900447	1.18e-08	ACR_MO
11	rs10831896	12693361	A	G	32186	0.462919	-0.0427097	0.00781807	4.68e-08	ACR_MO
16	rs4843550	87236383	G	C	31952	0.430755	0.0476775	0.00786145	1.32e-09	ACR_MO
17	rs146005466	7167751	A	G	32309	0.0359033	0.119744	0.0208884	9.89e-09	ACR_MO
2	rs76122535	203664929	G	C	31958	0.132658	-0.0578409	0.0105319	3.97e-08	ACR_RD
2	rs12694390	217332054	T	C	32023	0.304281	-0.047639	0.00776507	8.51e-10	ACR_RD
3	rs6442411	13836296	T	C	31982	0.396082	-0.0411109	0.00728948	1.7e-08	ACR_RD
3	rs3755651	183366595	A	G	32310	0.160817	-0.0644723	0.00967243	2.64e-11	ACR_RD
4	rs4385132	54210482	T	A	31983	0.35017	-0.0539692	0.00747886	5.34e-13	ACR_RD
4	rs35588958	121655414	G	T	31506	0.257062	-0.0488311	0.00828902	3.84e-09	ACR_RD
5	rs1847037	81900820	T	C	31873	0.293681	0.0445763	0.0078808	1.55e-08	ACR_RD
5	rs11746859	82770558	G	A	32093	0.461035	0.0622316	0.00718685	4.76e-18	ACR_RD
5	rs3852188	82858014	G	C	32000	0.190859	0.132105	0.00904672	2.71e-48	ACR_RD
5	rs3776089	139727260	G	A	32009	0.261458	-0.0476491	0.0081428	4.87e-09	ACR_RD
6	rs3130724	29118530	A	C	32319	0.227018	-0.0613745	0.00848701	4.77e-13	ACR_RD
6	rs7752077	112147107	T	C	32163	0.138482	-0.0588056	0.0102762	1.05e-08	ACR_RD
7	rs1800814	540741	A	G	31964	0.483826	-0.048283	0.00715249	1.47e-11	ACR_RD
8	rs55705857	130645692	G	A	32319	0.055602	0.124619	0.015525	9.99e-16	ACR_RD
8	rs7016860	145000221	A	G	32280	0.424504	-0.0472901	0.00718913	4.77e-11	ACR_RD
9	rs201911236	111749466	A	G	31192	0.0416453	-0.101792	0.0181516	2.05e-08	ACR_RD
10	rs3910909	49844458	T	C	31959	0.486498	0.0424837	0.00717021	3.12e-09	ACR_RD
10	rs11191835	105621859	C	T	32179	0.39013	0.048911	0.0073239	2.42e-11	ACR_RD
11	rs7124615	186604	T	C	30622	0.108158	-0.0655786	0.011775	2.56e-08	ACR_RD
11	rs2303865	44636833	A	G	32275	0.131867	0.0830108	0.0104965	2.61e-15	ACR_RD
11	rs10765771	95521044	G	A	32317	0.421435	0.0425155	0.00722345	3.96e-09	ACR_RD
12	rs73096828	51165885	A	G	32068	0.200433	-0.0491382	0.00892883	3.73e-08	ACR_RD
17	rs113882147	42901884	C	T	32259	0.157398	-0.0805748	0.00979958	2e-16	ACR_RD
17	rs7502890	43152675	G	A	32201	0.464302	0.047595	0.00713948	2.62e-11	ACR_RD
17	rs55938136	43798360	G	A	32311	0.221937	0.0559691	0.00854269	5.69e-11	ACR_RD
17	rs62086903	66016006	C	T	31556	0.226676	0.0573165	0.00857938	2.38e-11	ACR_RD
19	rs11673604	18540988	C	T	31994	0.361521	0.0434213	0.0074598	5.86e-09	ACR_RD
22	rs6006426	30669883	G	A	32319	0.464061	0.043965	0.00714546	7.61e-10	ACR_RD
22	rs4820970	31777990	T	C	31954	0.291528	0.0440965	0.00786437	2.06e-08	ACR_RD
22	rs1004764	38474852	G	A	32164	0.378669	0.0533517	0.00735052	3.92e-13	ACR_RD
3	rs13059215	13838652	C	G	32165	0.281424	0.0441235	0.00778563	1.45e-08	ALIC_AD
3	rs1464047	39526874	C	T	31531	0.478513	-0.0470018	0.00697977	1.65e-11	ALIC_AD
3	rs186872977	76266095	T	A	31852	0.404888	-0.039299	0.00715706	4e-08	ALIC_AD
9	rs7025914	12760884	C	T	32190	0.378487	0.0443398	0.00713519	5.16e-10	ALIC_AD
10	rs10430577	18226707	T	C	31232	0.234871	-0.0517443	0.00834792	5.7e-10	ALIC_AD
10	rs1325994	18657521	G	A	32130	0.471989	-0.0391089	0.00695493	1.87e-08	ALIC_AD
10	rs7079298	105447781	C	T	31573	0.463798	0.0403065	0.00705615	1.11e-08	ALIC_AD
11	rs2071020	10478228	T	C	32126	0.45583	0.0544254	0.0070007	7.59e-15	ALIC_AD
11	rs2052690	10664033	T	G	32058	0.288571	-0.050714	0.00770759	4.71e-11	ALIC_AD
11	rs2303865	44636833	A	G	32268	0.131802	0.0928966	0.0102487	1.26e-19	ALIC_AD
13	rs11838776	111040681	A	G	31137	0.276889	0.0433411	0.00789956	4.1e-08	ALIC_AD
17	rs2693362	43657393	G	A	30232	0.179198	0.0556048	0.00933541	2.58e-09	ALIC_AD
19	rs62126783	17596144	G	A	32135	0.468523	-0.0417259	0.0069971	2.47e-09	ALIC_AD
2	rs191991898	203845340	G	T	30832	0.0991665	0.11011	0.0130224	2.78e-17	ALIC_FA
3	rs66710942	77215327	C	T	31778	0.403439	0.0483298	0.00781721	6.31e-10	ALIC_FA
5	rs10052710	82860025	G	T	32491	0.194669	-0.0734808	0.00952916	1.25e-14	ALIC_FA
9	rs1543587	12751741	T	C	32496	0.375631	0.0474134	0.00779617	1.19e-09	ALIC_FA
10	rs2863994	105454043	G	T	32005	0.486908	0.0537467	0.00764361	2.04e-12	ALIC_FA
10	rs11191840	105634896	T	A	32406	0.361661	0.0453407	0.007901	9.55e-09	ALIC_FA
12	rs11055034	12890626	A	C	32312	0.278225	-0.0509814	0.00847241	1.77e-09	ALIC_FA
12	rs12146713	106476805	C	T	32559	0.0948586	0.0830351	0.0128932	1.19e-10	ALIC_FA
13	rs11838776	111040681	A	G	31374	0.276949	-0.0493596	0.00861756	1.02e-08	ALIC_FA
15	rs208829	89947042	A	G	31889	0.385525	0.042956	0.00785128	4.47e-08	ALIC_FA
16	rs17719345	89911681	C	G	32312	0.199957	0.0523219	0.00951739	3.85e-08	ALIC_FA
17	rs55938136	43798360	G	A	32551	0.221883	-0.0643579	0.00909565	1.49e-12	ALIC_FA
17	rs199504	44861003	C	T	32393	0.21463	-0.0713083	0.00923352	1.14e-14	ALIC_FA
17	rs8077636	79421254	T	G	32062	0.415476	0.0480868	0.00776407	5.88e-10	ALIC_FA
19	rs179570	36251326	G	A	32559	0.468764	0.0462333	0.00757827	1.06e-09	ALIC_FA
22	rs2018980	38450620	A	G	32402	0.370394	-0.0447616	0.00784548	1.16e-08	ALIC_FA
1	rs310241	65303338	G	A	31911	0.221632	-0.0485561	0.0086092	1.7e-08	ALIC_MD
1	rs12068025	234738875	A	G	31442	0.449542	-0.0403756	0.00724996	2.56e-08	ALIC_MD
2	rs6708226	69377605	A	G	29512	0.474688	0.0410572	0.00742295	3.18e-08	ALIC_MD
2	rs186399184	203728984	T	C	31501	0.117457	-0.0792513	0.0111625	1.25e-12	ALIC_MD
2	rs6749936	232055684	T	C	32049	0.210724	0.0544768	0.00875595	4.92e-10	ALIC_MD
5	rs35896134	82887421	T	C	31802	0.0553739	0.10844	0.0156286	3.96e-12	ALIC_MD
5	rs9112	121518309	A	G	32109	0.408421	0.0435238	0.00724035	1.84e-09	ALIC_MD
10	rs7898858	18653861	A	C	31954	0.477937	-0.0569859	0.00712193	1.23e-15	ALIC_MD
10	rs2863994	105454043	G	T	31567	0.487677	-0.0610141	0.00717927	1.92e-17	ALIC_MD
10	rs371240513	105669290	G	A	31988	0.361229	-0.0547132	0.00742405	1.71e-13	ALIC_MD
11	rs34716494	9287401	T	A	31914	0.237968	0.0499748	0.00836669	2.33e-09	ALIC_MD
11	rs2303865	44636833	A	G	32065	0.131748	0.0869577	0.0105087	1.29e-16	ALIC_MD
12	rs7314654	20755963	G	A	32017	0.174704	-0.0636457	0.00937214	1.11e-11	ALIC_MD
13	rs650724	110804809	A	G	31854	0.0897532	-0.0737633	0.0125225	3.85e-09	ALIC_MD
13	rs11838776	111040681	A	G	30939	0.276496	0.0583357	0.00809849	5.88e-13	ALIC_MD
17	rs1971374	43659738	C	T	31920	0.208631	0.0752568	0.00873907	7.21e-18	ALIC_MD
19	rs350823	4082799	C	T	31362	0.25008	-0.0482104	0.00833357	7.25e-09	ALIC_MD
22	rs2283884	33248055	T	A	31955	0.191691	0.0527419	0.00909804	6.75e-09	ALIC_MD
1	rs4141741	43843000	T	C	32321	0.377804	0.051088	0.00729513	2.5e-12	ALIC_MO
1	rs7519919	165867442	C	T	32111	0.446233	-0.0394621	0.00711386	2.9e-08	ALIC_MO
1	rs12749024	176522365	T	C	31094	0.146507	-0.0589415	0.0101845	7.15e-09	ALIC_MO
1	rs1044595	180943529	C	T	32108	0.398359	0.0407114	0.00722666	1.77e-08	ALIC_MO
2	rs4670189	33763497	C	G	32279	0.157548	-0.0719141	0.00972963	1.45e-13	ALIC_MO
2	rs112926099	204066671	A	G	32233	0.0505538	-0.0917924	0.0161254	1.25e-08	ALIC_MO
3	rs9842055	190678743	G	T	30608	0.434494	-0.0481378	0.00734942	5.76e-11	ALIC_MO
5	rs7719289	139706525	T	G	31723	0.22791	-0.0466873	0.00850024	3.96e-08	ALIC_MO
8	rs1806949	142014531	T	C	31111	0.435039	-0.0424271	0.00727025	5.36e-09	ALIC_MO
9	rs10962522	16657540	C	G	32043	0.0317854	-0.110439	0.0201929	4.52e-08	ALIC_MO
9	rs4405007	92100804	T	C	32346	0.288475	-0.0465133	0.007836	2.92e-09	ALIC_MO
10	rs10828248	21824619	G	A	32338	0.341255	-0.0470859	0.00744167	2.49e-10	ALIC_MO
11	rs11605232	10468501	C	T	31837	0.467742	0.0513593	0.00716742	7.74e-13	ALIC_MO
12	rs12146713	106476805	C	T	32346	0.0947412	0.0814573	0.0120478	1.37e-11	ALIC_MO
14	rs1285847	91884655	C	T	32006	0.442558	0.0453875	0.00715493	2.25e-10	ALIC_MO
15	rs150301	89945961	C	G	32229	0.365339	0.0493821	0.00736722	2.04e-11	ALIC_MO
16	rs4843555	87231160	T	C	32084	0.415924	-0.0441929	0.00719341	8.07e-10	ALIC_MO
17	rs372745970	44322577	C	G	30977	0.202037	0.0524991	0.00897927	5.01e-09	ALIC_MO
18	rs7242621	57389139	C	T	32329	0.322157	0.0432727	0.00760967	1.3e-08	ALIC_MO
18	rs12957119	60881155	C	A	32076	0.194413	0.0491517	0.00900111	4.74e-08	ALIC_MO
19	rs231592	36219209	G	A	32219	0.467131	0.0394097	0.00709017	2.72e-08	ALIC_MO
22	rs2018980	38450620	A	G	32188	0.370231	-0.0414322	0.00733106	1.59e-08	ALIC_MO
2	rs4358156	69354700	T	C	32116	0.478266	-0.0425496	0.00741417	9.53e-09	ALIC_RD
2	rs186399184	203728984	T	C	31509	0.117506	-0.100488	0.0115951	4.46e-18	ALIC_RD
2	rs6749936	232055684	T	C	32056	0.210647	0.0500026	0.00909706	3.87e-08	ALIC_RD
5	rs7733216	82857870	C	T	31617	0.198374	0.0709081	0.00931402	2.68e-14	ALIC_RD
5	rs9112	121518309	A	G	32116	0.408286	0.0483858	0.00752309	1.26e-10	ALIC_RD
6	rs34196306	27425644	C	G	32040	0.111298	-0.064401	0.011755	4.29e-08	ALIC_RD
6	rs12206172	151021722	G	A	31793	0.418693	0.0420246	0.00753211	2.41e-08	ALIC_RD
8	rs4840922	8177487	A	C	32046	0.430709	0.0423104	0.00747048	1.48e-08	ALIC_RD
9	rs1246263	86762039	C	G	31789	0.301661	-0.0441459	0.00809777	4.99e-08	ALIC_RD
10	rs7923885	18654871	G	A	31964	0.477396	-0.0572256	0.00739973	1.05e-14	ALIC_RD
10	rs2863994	105454043	G	T	31574	0.487601	-0.067991	0.00745815	7.77e-20	ALIC_RD
10	rs371240513	105669290	G	A	31995	0.36126	-0.0598887	0.00771294	8.18e-15	ALIC_RD
11	rs34716494	9287401	T	A	31923	0.237979	0.0475015	0.00869215	4.63e-08	ALIC_RD
11	rs2303865	44636833	A	G	32072	0.131766	0.0629569	0.0109186	8.12e-09	ALIC_RD
12	rs7314654	20755963	G	A	32024	0.17465	-0.0685824	0.00973633	1.87e-12	ALIC_RD
12	rs12146713	106476805	C	T	32116	0.0948437	-0.0736279	0.0125804	4.84e-09	ALIC_RD
13	rs11838776	111040681	A	G	30947	0.276586	0.0590361	0.00841049	2.23e-12	ALIC_RD
15	rs74247779	75397131	A	G	32047	0.0857803	0.0733222	0.0131653	2.56e-08	ALIC_RD
17	rs1971374	43659738	C	T	31928	0.208626	0.0784963	0.00907997	5.38e-18	ALIC_RD
17	rs2645466	57853214	C	A	32116	0.289793	-0.0451943	0.00810635	2.47e-08	ALIC_RD
22	rs2283884	33248055	T	A	31961	0.191702	0.0568675	0.00945405	1.8e-09	ALIC_RD
2	rs1371044	145695907	A	G	31979	0.237156	-0.0474823	0.00853371	2.64e-08	Average_AD
3	rs11128657	13833084	C	T	31473	0.4131	-0.0683466	0.00740617	2.75e-20	Average_AD
3	rs4894803	171800256	G	A	31613	0.407269	0.0428102	0.00745824	9.47e-09	Average_AD
4	rs11133252	54102043	A	T	32295	0.3658	-0.0466398	0.0074637	4.13e-10	Average_AD
4	rs4862340	185124305	A	G	31527	0.392648	-0.0529863	0.00745626	1.19e-12	Average_AD
5	rs11746859	82770558	G	A	32119	0.46102	0.0539072	0.00729272	1.45e-13	Average_AD
5	rs17205972	82859065	T	G	32301	0.193276	0.137785	0.00909708	8.04e-52	Average_AD
5	rs4150196	139726641	T	C	31891	0.460867	-0.0399476	0.00730013	4.45e-08	Average_AD
6	rs2517524	31025713	A	C	32318	0.456062	0.0418485	0.00724673	7.7e-09	Average_AD
6	rs2842759	142436352	T	C	32228	0.237899	-0.0491694	0.00849397	7.09e-09	Average_AD
7	rs9692176	548066	G	T	30543	0.405739	-0.051818	0.00757293	7.78e-12	Average_AD
7	rs151057105	54944920	T	C	32073	0.0917906	0.098264	0.0125412	4.68e-15	Average_AD
7	rs2252826	134678523	C	T	31839	0.288231	-0.045723	0.0080271	1.23e-08	Average_AD
9	rs72764225	113664185	C	A	32330	0.21313	0.0502487	0.00880064	1.13e-08	Average_AD
10	rs2488002	105679341	C	T	32314	0.153355	0.0656881	0.00998897	4.83e-11	Average_AD
11	rs2071020	10478228	T	C	32160	0.45583	0.0606691	0.007275	7.47e-17	Average_AD
11	rs7935166	44636547	A	G	32346	0.132505	0.0979617	0.0106182	2.81e-20	Average_AD
11	rs60491498	82433770	A	C	32182	0.111149	-0.0638682	0.0114937	2.75e-08	Average_AD
11	rs631611	85823324	C	T	32178	0.46308	0.0396177	0.00723813	4.41e-08	Average_AD
12	rs7297175	56473808	T	C	32250	0.434217	0.0404305	0.00729088	2.93e-08	Average_AD
15	rs4775425	61946574	G	A	32105	0.43501	-0.0411495	0.00731171	1.82e-08	Average_AD
16	rs1948948	51442679	T	C	32250	0.441209	0.0636833	0.00726448	1.84e-18	Average_AD
17	rs4790877	1995254	G	A	31966	0.414534	0.0465588	0.0073777	2.78e-10	Average_AD
17	rs7223589	29728284	T	C	31062	0.380256	-0.0462707	0.00754295	8.55e-10	Average_AD
17	rs77665779	43022994	T	C	32192	0.360152	-0.0512541	0.00753173	1.01e-11	Average_AD
17	rs4793169	43152877	T	C	32234	0.401796	-0.0441011	0.00739937	2.52e-09	Average_AD
17	rs62086884	65994400	C	G	32017	0.19827	0.0554009	0.00911051	1.19e-09	Average_AD
19	rs769449	45410002	A	G	32346	0.123709	0.063665	0.0109419	5.94e-09	Average_AD
1	rs3795736	156612932	C	T	32565	0.297958	0.0441089	0.00795737	2.97e-08	Average_FA
2	rs186399184	203728984	T	C	31947	0.117147	0.0632878	0.0114122	2.93e-08	Average_FA
2	rs7590302	217330901	C	T	32359	0.306051	0.0556879	0.00790816	1.9e-12	Average_FA
3	rs142003765	39479611	G	A	32431	0.0188708	-0.150319	0.0267871	2e-08	Average_FA
4	rs2412397	54109623	C	T	32452	0.365663	0.0519023	0.00752199	5.2e-12	Average_FA
5	rs1479569	82377566	T	C	32261	0.433093	0.043492	0.00739014	3.98e-09	Average_FA
5	rs1867667	82779013	G	A	32544	0.260924	0.065715	0.00827934	2.07e-15	Average_FA
5	rs10052710	82860025	G	T	32497	0.194664	-0.136737	0.00914003	1.34e-50	Average_FA
5	rs4150221	139719991	C	T	32507	0.26605	0.0562068	0.00823195	8.62e-12	Average_FA
6	rs3129787	29048689	T	A	32324	0.286242	0.0540349	0.0080965	2.49e-11	Average_FA
6	rs9481189	112113938	C	T	32377	0.136717	0.0591977	0.0105621	2.09e-08	Average_FA
7	rs28376477	541032	G	C	32140	0.485734	0.042224	0.00731169	7.7e-09	Average_FA
8	rs1693571	101678349	T	A	32364	0.464745	-0.046376	0.00730799	2.21e-10	Average_FA
8	rs55705857	130645692	G	A	32565	0.0556426	-0.110739	0.0158511	2.82e-12	Average_FA
8	rs11557085	145752900	T	C	31545	0.470915	-0.0428361	0.00739462	6.92e-09	Average_FA
9	rs28361101	111775756	C	G	32544	0.026057	0.130111	0.0227982	1.15e-08	Average_FA
10	rs911547	105639421	G	A	32417	0.135993	-0.0657161	0.0106351	6.44e-10	Average_FA
16	rs4984741	1025464	A	G	32565	0.255704	-0.0479893	0.00833047	8.38e-09	Average_FA
16	rs56362600	89907947	A	G	32316	0.199174	0.052676	0.0091441	8.38e-09	Average_FA
17	rs199501	44862613	A	G	32565	0.234116	-0.0597734	0.00857659	3.18e-12	Average_FA
17	rs62086884	65994400	C	G	32235	0.198123	-0.0505758	0.0091724	3.51e-08	Average_FA
19	rs179570	36251326	G	A	32565	0.468693	0.0457577	0.00726875	3.07e-10	Average_FA
20	rs6062264	61154871	T	C	31841	0.278446	-0.0509733	0.00821708	5.53e-10	Average_FA
22	rs2267161	30953295	T	C	32565	0.308967	0.0456606	0.00788318	6.95e-09	Average_FA
22	rs2018980	38450620	A	G	32407	0.370398	-0.0507514	0.0075244	1.53e-11	Average_FA
1	rs2841614	215186121	C	T	32343	0.0716848	-0.0755536	0.0136584	3.17e-08	Average_MD
3	rs11128657	13833084	C	T	31469	0.413105	-0.060152	0.00723869	9.59e-17	Average_MD
3	rs4894803	171800256	G	A	31610	0.407276	0.0459018	0.00728862	3.02e-10	Average_MD
4	rs11133252	54102043	A	T	32292	0.365865	-0.0526517	0.00729391	5.25e-13	Average_MD
4	rs4862340	185124305	A	G	31523	0.392697	-0.0509777	0.00728807	2.66e-12	Average_MD
5	rs1479569	82377566	T	C	32042	0.433119	-0.0394557	0.00717767	3.86e-08	Average_MD
5	rs33599	82774904	A	G	32275	0.26141	-0.0667235	0.00803576	1.01e-16	Average_MD
5	rs10052710	82860025	G	T	32276	0.194773	0.14895	0.0088698	2.75e-63	Average_MD
5	rs4150221	139719991	C	T	32285	0.265851	-0.0526619	0.00799198	4.42e-11	Average_MD
6	rs3116836	29180314	C	A	31859	0.238912	-0.0567941	0.00832796	9.12e-12	Average_MD
6	rs225694	142527142	A	G	32343	0.229354	-0.0457886	0.00839572	4.93e-08	Average_MD
7	rs9692176	548066	G	T	30541	0.405733	-0.051917	0.00740103	2.3e-12	Average_MD
7	rs77126132	54966738	A	G	32043	0.0909871	0.0838718	0.0123085	9.48e-12	Average_MD
8	rs372295105	122469206	C	T	30620	0.285304	0.0494417	0.0080733	9.12e-10	Average_MD
8	rs55705857	130645692	G	A	32343	0.0556225	0.100116	0.0153916	7.79e-11	Average_MD
9	rs4977575	22124744	G	C	32267	0.490687	-0.0385964	0.00706871	4.76e-08	Average_MD
9	rs3793477	86594719	C	G	32314	0.270641	0.0438629	0.00793777	3.28e-08	Average_MD
9	rs201911236	111749466	A	G	31216	0.0416293	-0.113859	0.018001	2.53e-10	Average_MD
10	rs2488002	105679341	C	T	32311	0.153322	0.0668681	0.00976304	7.43e-12	Average_MD
11	rs7935166	44636547	A	G	32343	0.132502	0.0830125	0.0103777	1.25e-15	Average_MD
16	rs1948948	51442679	T	C	32248	0.441206	0.0525657	0.00709957	1.32e-13	Average_MD
17	rs9303241	1978963	T	A	32312	0.423821	0.0434896	0.00715337	1.2e-09	Average_MD
17	rs8082186	42661215	C	T	31691	0.324288	-0.0455214	0.00760446	2.15e-09	Average_MD
17	rs62071596	44349169	C	T	29292	0.177147	0.0705388	0.00968906	3.33e-13	Average_MD
17	rs62086884	65994400	C	G	32014	0.198288	0.0591474	0.00890302	3.06e-11	Average_MD
19	rs769449	45410002	A	G	32343	0.123721	0.0607008	0.0106921	1.37e-08	Average_MD
22	rs34399834	32036692	A	G	32314	0.0400136	0.103904	0.0179488	7.08e-09	Average_MD
1	rs10788930	51118253	T	C	32247	0.151301	-0.0626826	0.0103544	1.42e-09	Average_MO
2	rs368863059	203651201	G	A	31749	0.125563	0.0740959	0.0112577	4.65e-11	Average_MO
9	rs1571535	92215734	T	C	31357	0.484517	0.0429146	0.00753176	1.21e-08	Average_MO
10	rs10886016	118668311	A	G	32004	0.250844	0.0620349	0.00857076	4.55e-13	Average_MO
13	rs7319045	92024574	A	G	32342	0.372519	-0.0423388	0.00762613	2.83e-08	Average_MO
14	rs3784239	105629947	C	T	31975	0.377498	0.0502115	0.00767754	6.15e-11	Average_MO
2	rs7590302	217330901	C	T	32138	0.306055	-0.044145	0.00763469	7.38e-09	Average_RD
3	rs6442411	13836296	T	C	32004	0.396075	-0.0520643	0.00718753	4.37e-13	Average_RD
3	rs4678169	124543103	A	C	32342	0.346809	-0.0406867	0.00735428	3.16e-08	Average_RD
3	rs4894803	171800256	G	A	31609	0.407289	0.0436427	0.00724735	1.72e-09	Average_RD
4	rs2412397	54109623	C	T	32229	0.365758	-0.0519001	0.00725945	8.72e-13	Average_RD
4	rs185307128	185132354	C	T	31780	0.382914	-0.0468454	0.00724471	1.01e-10	Average_RD
5	rs1015440	82498805	G	A	32062	0.422603	-0.0395379	0.00714328	3.11e-08	Average_RD
5	rs33599	82774904	A	G	32274	0.261356	-0.0661269	0.00799128	1.29e-16	Average_RD
5	rs10052710	82860025	G	T	32275	0.194748	0.143538	0.00882022	1.52e-59	Average_RD
5	rs4150221	139719991	C	T	32284	0.265875	-0.052972	0.00794656	2.63e-11	Average_RD
6	rs3116836	29180314	C	A	31858	0.238857	-0.0588392	0.00828131	1.2e-12	Average_RD
7	rs9692176	548066	G	T	30540	0.405681	-0.0488143	0.00735949	3.29e-11	Average_RD
7	rs77126132	54966738	A	G	32042	0.0909899	0.0717551	0.0122394	4.56e-09	Average_RD
8	rs372295105	122469206	C	T	30619	0.285264	0.0468746	0.00802856	5.27e-09	Average_RD
8	rs55705857	130645692	G	A	32342	0.0556243	0.0996915	0.0153051	7.34e-11	Average_RD
9	rs201911236	111749466	A	G	31215	0.0416306	-0.111138	0.0178999	5.34e-10	Average_RD
10	rs911547	105639421	G	A	32195	0.135906	0.069044	0.0102695	1.78e-11	Average_RD
11	rs7935166	44636547	A	G	32342	0.132521	0.069161	0.0103191	2.05e-11	Average_RD
16	rs7196814	51449760	A	G	31813	0.441015	0.0441923	0.00711289	5.2e-10	Average_RD
17	rs9303241	1978963	T	A	32311	0.423834	0.0388109	0.00711289	4.86e-08	Average_RD
17	rs8082186	42661215	C	T	31690	0.324282	-0.0421241	0.00756231	2.54e-08	Average_RD
17	rs199501	44862613	A	G	32342	0.234169	0.0644765	0.0082776	6.74e-15	Average_RD
17	rs62086884	65994400	C	G	32013	0.198294	0.0562302	0.00885306	2.13e-10	Average_RD
19	rs7256200	45415935	T	G	32146	0.124075	0.0581819	0.0106451	4.61e-08	Average_RD
22	rs2267161	30953295	T	C	32342	0.308995	-0.0426007	0.00761056	2.17e-08	Average_RD
22	rs5753783	32175993	T	G	32342	0.04018	0.0982931	0.0178441	3.62e-08	Average_RD
2	rs1861435	37075013	A	T	32070	0.42362	-0.0631792	0.00745699	2.4e-17	BCC_AD
2	rs1949411	63571808	T	C	32233	0.164304	-0.055707	0.00991313	1.91e-08	BCC_AD
3	rs6442409	13835087	T	C	31454	0.342611	-0.0655156	0.00779686	4.36e-17	BCC_AD
4	rs13130545	185125306	G	T	32043	0.341978	0.0472599	0.00775486	1.1e-09	BCC_AD
5	rs10447107	66069819	A	G	31701	0.355083	-0.0422347	0.00769165	4e-08	BCC_AD
5	rs3852188	82858014	G	C	32018	0.190846	0.0842825	0.00928697	1.13e-19	BCC_AD
5	rs11249651	179073824	C	T	32175	0.434017	0.0406559	0.00742901	4.44e-08	BCC_AD
10	rs12355217	14671520	T	A	31233	0.330772	-0.0479036	0.00787419	1.18e-09	BCC_AD
11	rs6484290	10470852	G	A	32055	0.465996	0.0492358	0.00736283	2.28e-11	BCC_AD
13	rs927707	99665694	G	A	32287	0.0467835	0.0987919	0.0172771	1.08e-08	BCC_AD
15	rs7403630	34654165	A	G	30890	0.460602	-0.0418231	0.00751845	2.66e-08	BCC_AD
17	rs7225002	44189067	G	A	32171	0.413742	0.0505135	0.00743118	1.06e-11	BCC_AD
19	rs1807134	17590860	G	A	32229	0.475395	-0.0474721	0.00734847	1.05e-10	BCC_AD
1	rs1998717	67120544	T	G	32477	0.132555	0.0628387	0.0112238	2.16e-08	BCC_FA
2	rs6748809	98391355	C	T	32354	0.315386	-0.0452691	0.00822479	3.71e-08	BCC_FA
2	rs7590302	217330901	C	T	32352	0.306102	0.0513509	0.0082929	5.93e-10	BCC_FA
4	rs16843452	2849168	T	C	31670	0.184796	-0.0556309	0.00994067	2.19e-08	BCC_FA
5	rs3852188	82858014	G	C	32236	0.190765	-0.0780469	0.00969169	8.08e-16	BCC_FA
5	rs4150221	139719991	C	T	32499	0.265962	0.0681026	0.00863428	3.08e-15	BCC_FA
6	rs34470113	28607995	T	C	32476	0.267659	0.0566583	0.0086299	5.19e-11	BCC_FA
8	rs72673629	120931207	G	A	31735	0.437577	-0.0443038	0.00778718	1.28e-08	BCC_FA
8	rs11136342	145044749	G	A	32219	0.398662	0.0607968	0.00780242	6.59e-15	BCC_FA
12	rs61953461	121901255	T	C	32362	0.400918	0.0433598	0.00777004	2.4e-08	BCC_FA
17	rs199501	44862613	A	G	32557	0.234066	-0.0640534	0.00899468	1.07e-12	BCC_FA
19	rs231244	36243190	C	T	32516	0.470691	0.0423905	0.00761634	2.61e-08	BCC_FA
20	rs6062264	61154871	T	C	31833	0.278422	-0.0502018	0.00861738	5.69e-09	BCC_FA
22	rs2018980	38450620	A	G	32399	0.370413	-0.0566509	0.00789081	7e-13	BCC_FA
1	rs372208938	207895364	G	A	32096	0.430225	-0.0396344	0.00719497	3.62e-08	BCC_MD
2	rs7605601	37147975	G	T	32191	0.456106	-0.0426759	0.00717008	2.65e-09	BCC_MD
3	rs6442409	13835087	T	C	31454	0.342548	-0.0463206	0.00759728	1.08e-09	BCC_MD
5	rs33599	82774904	A	G	32267	0.261351	-0.0543209	0.00810723	2.08e-11	BCC_MD
5	rs3852188	82858014	G	C	32016	0.190811	0.10156	0.00904889	3.13e-29	BCC_MD
8	rs6469870	120922013	A	G	32184	0.433259	0.0395202	0.00720532	4.14e-08	BCC_MD
8	rs13439519	145012206	A	G	32242	0.404426	-0.0508814	0.00723512	2.03e-12	BCC_MD
9	rs1572030	86571611	A	G	32335	0.463383	-0.0445036	0.00714751	4.77e-10	BCC_MD
12	rs9634168	121874180	C	T	32268	0.394152	-0.0402915	0.00726119	2.87e-08	BCC_MD
13	rs12869774	99100157	A	G	32055	0.0574169	0.0851176	0.0153704	3.06e-08	BCC_MD
16	rs72813426	89933007	G	A	30661	0.232902	0.0513949	0.00861583	2.44e-09	BCC_MD
17	rs7225002	44189067	G	A	32170	0.413693	0.0593552	0.00723986	2.44e-16	BCC_MD
1	rs3795503	180905694	T	C	32190	0.315455	0.0435169	0.00792532	4e-08	BCC_MO
3	rs2088882	190656524	G	A	32058	0.381402	0.0480605	0.00760863	2.67e-10	BCC_MO
7	rs798518	2777825	G	A	32258	0.308761	-0.0854886	0.00797966	8.81e-27	BCC_MO
9	rs10980628	113671403	C	T	32299	0.211802	0.0642189	0.00898779	8.99e-13	BCC_MO
12	rs12146713	106476805	C	T	32335	0.0947425	-0.100469	0.0125201	1.02e-15	BCC_MO
14	rs66476176	91916240	C	T	32196	0.450429	-0.0403047	0.00738249	4.77e-08	BCC_MO
16	rs4843552	87233516	G	A	32062	0.420326	0.0764323	0.00745931	1.23e-24	BCC_MO
20	rs6088765	33799280	G	T	32335	0.42372	0.0448805	0.00742266	1.48e-09	BCC_MO
1	rs4655504	67091804	G	A	32021	0.127338	-0.0643017	0.0110097	5.21e-09	BCC_RD
2	rs6748809	98391355	C	T	32118	0.315446	0.0449028	0.0079057	1.35e-08	BCC_RD
2	rs7590302	217330901	C	T	32118	0.306106	-0.048545	0.0079704	1.12e-09	BCC_RD
4	rs2051560	2912140	T	G	32305	0.183222	0.0566523	0.00945801	2.1e-09	BCC_RD
5	rs33599	82774904	A	G	32253	0.261325	-0.0475027	0.00834278	1.24e-08	BCC_RD
5	rs3852188	82858014	G	C	32003	0.190763	0.0857121	0.00931415	3.5e-20	BCC_RD
5	rs4150221	139719991	C	T	32263	0.265784	-0.0523265	0.00829728	2.85e-10	BCC_RD
6	rs34470113	28607995	T	C	32240	0.267866	-0.0512507	0.00829029	6.33e-10	BCC_RD
8	rs6469870	120922013	A	G	32170	0.433214	0.0436107	0.00741541	4.08e-09	BCC_RD
8	rs13439519	145012206	A	G	32228	0.404415	-0.0605692	0.00744615	4.14e-16	BCC_RD
9	rs1572030	86571611	A	G	32321	0.46346	-0.0448914	0.00735628	1.04e-09	BCC_RD
12	rs61953461	121901255	T	C	32127	0.400769	-0.0441128	0.00746639	3.46e-09	BCC_RD
16	rs72813426	89933007	G	A	30647	0.232861	0.0533675	0.00886802	1.77e-09	BCC_RD
17	rs199501	44862613	A	G	32321	0.234012	0.0624436	0.00864661	5.13e-13	BCC_RD
22	rs13056506	38580917	G	T	32321	0.397466	0.041528	0.00749631	3.03e-08	BCC_RD
1	rs2786104	197312434	T	A	32303	0.109046	0.083619	0.0125495	2.68e-11	CGC_AD
2	rs1562452	46580444	A	G	32212	0.463694	-0.0428886	0.00786525	4.95e-08	CGC_AD
2	rs2564388	198328806	C	T	30322	0.462486	-0.0463717	0.00813012	1.17e-08	CGC_AD
3	rs142003765	39479611	G	A	32213	0.0189209	-0.222808	0.0287958	1.01e-14	CGC_AD
5	rs72761269	66153524	A	G	31874	0.355603	-0.0565713	0.00822005	5.9e-12	CGC_AD
5	rs309591	82849675	C	T	32284	0.0755792	0.132782	0.0148023	2.95e-19	CGC_AD
11	rs7935166	44636547	A	G	32346	0.132489	0.0945196	0.0115087	2.16e-16	CGC_AD
11	rs9705336	73421287	A	G	31975	0.41007	-0.0494241	0.00794478	4.94e-10	CGC_AD
14	rs17180132	65209909	A	G	32346	0.0144376	-0.183448	0.0328782	2.41e-08	CGC_AD
15	rs12916824	73339987	G	A	31987	0.209444	0.0535071	0.00965611	3e-08	CGC_AD
15	rs1561809	87946857	T	A	32012	0.380014	-0.0509542	0.00818494	4.8e-10	CGC_AD
17	rs76653948	9151562	G	C	31981	0.174354	-0.0645637	0.0103524	4.47e-10	CGC_AD
20	rs6077868	10649761	T	C	31747	0.20194	-0.0682923	0.00977424	2.81e-12	CGC_AD
22	rs78276112	30622869	T	A	32289	0.0747313	0.0933657	0.0148611	3.33e-10	CGC_AD
1	rs113014813	197318309	G	A	32528	0.108353	0.0961096	0.0120388	1.42e-15	CGC_FA
3	rs142003765	39479611	G	A	32435	0.0188685	-0.177614	0.0275995	1.23e-10	CGC_FA
3	rs4855864	49521974	T	C	32538	0.438195	0.0475656	0.00752833	2.65e-10	CGC_FA
4	rs16875599	24392437	G	A	31771	0.403591	0.0422858	0.00774192	4.71e-08	CGC_FA
5	rs1982328	66085339	G	T	32010	0.367682	-0.0561123	0.00780668	6.59e-13	CGC_FA
5	rs17205972	82859065	T	G	32523	0.193202	-0.0686661	0.00943894	3.47e-13	CGC_FA
5	rs152234	179335060	A	G	32155	0.0995491	0.0696308	0.01258	3.11e-08	CGC_FA
7	rs797832	83579807	T	C	32462	0.413992	-0.0459056	0.00760799	1.6e-09	CGC_FA
10	rs2531686	118651011	C	G	32279	0.25371	0.0481386	0.00863952	2.52e-08	CGC_FA
11	rs9795439	1483543	A	G	32569	0.196306	0.0572662	0.00944559	1.34e-09	CGC_FA
12	rs12314118	53935803	A	G	32411	0.443291	0.0461954	0.00754988	9.43e-10	CGC_FA
12	rs10778036	100398078	G	T	32449	0.269654	-0.0474902	0.00846337	2.01e-08	CGC_FA
15	rs2415142	73431600	T	G	32321	0.453807	0.0416531	0.00753317	3.22e-08	CGC_FA
17	rs78894281	8908240	C	T	32569	0.0470693	-0.120382	0.0176005	7.94e-12	CGC_FA
17	rs76653948	9151562	G	C	32200	0.174301	-0.0839429	0.00990716	2.39e-17	CGC_FA
20	rs6077868	10649761	T	C	31966	0.201793	-0.053716	0.00935649	9.41e-09	CGC_FA
22	rs2413493	38448295	C	G	32079	0.404829	-0.0459603	0.00764879	1.87e-09	CGC_FA
3	rs11128657	13833084	C	T	31466	0.413049	-0.0624076	0.00779558	1.19e-15	CGC_MD
3	rs4678168	124543026	G	C	32322	0.346498	-0.0471339	0.00796443	3.26e-09	CGC_MD
4	rs80046940	53963973	G	C	30216	0.261997	-0.0530683	0.00891796	2.67e-09	CGC_MD
4	rs35260751	185127471	T	C	30715	0.272538	0.0542873	0.00876252	5.81e-10	CGC_MD
5	rs2731848	82510547	C	T	31840	0.439573	-0.0435654	0.00772134	1.68e-08	CGC_MD
5	rs33599	82774904	A	G	32271	0.261396	-0.0753257	0.00865257	3.16e-18	CGC_MD
5	rs17205972	82859065	T	G	32294	0.19324	0.150147	0.00957459	2.01e-55	CGC_MD
5	rs4150221	139719991	C	T	32281	0.265853	-0.0498143	0.00860408	7.05e-09	CGC_MD
6	rs9405372	867488	G	A	31976	0.420519	0.0435312	0.00775461	1.98e-08	CGC_MD
6	rs3117427	29274136	C	T	32339	0.12219	-0.0691978	0.0116161	2.57e-09	CGC_MD
7	rs111219357	518187	C	A	29706	0.405204	-0.0540421	0.00805377	1.94e-11	CGC_MD
7	rs77126132	54966738	A	G	32039	0.0910141	0.0898123	0.0132522	1.23e-11	CGC_MD
8	rs55705857	130645692	G	A	32339	0.055583	0.114103	0.0165782	5.87e-12	CGC_MD
10	rs2377523	49843196	A	G	31971	0.485893	0.0419804	0.00765517	4.16e-08	CGC_MD
11	rs2303865	44636833	A	G	32295	0.131878	0.115475	0.0112071	6.78e-25	CGC_MD
11	rs6592081	82443672	G	C	32339	0.365008	-0.0475137	0.00784032	1.36e-09	CGC_MD
17	rs533599885	43129104	C	G	31205	0.329803	-0.0459628	0.00823141	2.35e-08	CGC_MD
17	rs118087478	44051589	G	T	31667	0.211956	0.075592	0.00936252	6.81e-16	CGC_MD
22	rs2267161	30953295	T	C	32339	0.309054	-0.0494992	0.00824	1.89e-09	CGC_MD
22	rs1004764	38474852	G	A	32184	0.378573	0.0524	0.0078491	2.46e-11	CGC_MD
1	rs113014813	197318309	G	A	32307	0.108367	0.0944705	0.0123549	2.07e-14	CGC_MO
2	rs72844799	133523455	T	G	32310	0.100898	0.0730579	0.0127748	1.07e-08	CGC_MO
3	rs12496226	49734040	T	G	32228	0.3189	0.0585251	0.00825732	1.36e-12	CGC_MO
5	rs72761267	66150566	G	A	31848	0.356129	-0.0645081	0.0080747	1.36e-15	CGC_MO
6	rs725351	91118921	T	C	31937	0.3379	-0.0464469	0.00814794	1.19e-08	CGC_MO
7	rs797832	83579807	T	C	32242	0.413684	-0.0432098	0.00780569	3.1e-08	CGC_MO
10	rs10510025	118650996	T	C	32067	0.243443	0.0539466	0.00897628	1.86e-09	CGC_MO
11	rs9795439	1483543	A	G	32348	0.196256	0.064237	0.00969185	3.4e-11	CGC_MO
17	rs17743659	9154078	G	C	32029	0.377346	-0.0448799	0.00792697	1.5e-08	CGC_MO
17	rs8070753	9264728	A	G	31829	0.365861	0.054689	0.0080117	8.72e-12	CGC_MO
20	rs6077869	10650510	G	A	32323	0.22863	-0.0674851	0.00912687	1.42e-13	CGC_MO
1	rs61458598	197323727	T	C	32331	0.106832	-0.0711527	0.0119005	2.25e-09	CGC_RD
3	rs6442411	13836296	T	C	32017	0.396071	-0.0510356	0.00754444	1.34e-11	CGC_RD
3	rs4855864	49521974	T	C	32326	0.438331	-0.0440713	0.00740406	2.64e-09	CGC_RD
5	rs33599	82774904	A	G	32287	0.261375	-0.0614823	0.00838753	2.3e-13	CGC_RD
5	rs17205972	82859065	T	G	32310	0.193268	0.116155	0.00927998	6.05e-36	CGC_RD
5	rs3776089	139727260	G	A	32045	0.261414	-0.055544	0.0084277	4.38e-11	CGC_RD
6	rs3129787	29048689	T	A	32115	0.286517	-0.0517262	0.00820317	2.87e-10	CGC_RD
7	rs77126132	54966738	A	G	32055	0.0909842	0.0713989	0.0128469	2.73e-08	CGC_RD
7	rs797832	83579807	T	C	32249	0.413672	0.041136	0.00748133	3.83e-08	CGC_RD
8	rs4871304	123801257	T	C	30981	0.359043	-0.0442233	0.0078689	1.91e-08	CGC_RD
9	rs201911236	111749466	A	G	31228	0.0416133	-0.112489	0.018791	2.15e-09	CGC_RD
10	rs10886016	118668311	A	G	32017	0.250836	-0.0465149	0.00853145	4.98e-08	CGC_RD
11	rs2303865	44636833	A	G	32311	0.131875	0.0638067	0.0108619	4.25e-09	CGC_RD
12	rs12231289	53949318	A	G	32143	0.443534	-0.0417598	0.00743041	1.91e-08	CGC_RD
17	rs11078050	12005251	A	G	32213	0.475119	0.0484512	0.00740546	6.04e-11	CGC_RD
17	rs199501	44862613	A	G	32355	0.234183	0.0581725	0.00868787	2.14e-11	CGC_RD
17	rs78794747	66023705	T	A	32015	0.20278	0.0545421	0.00920582	3.13e-09	CGC_RD
22	rs1004763	38474952	C	T	32355	0.420352	0.0522545	0.00745511	2.4e-12	CGC_RD
5	rs3852188	82858014	G	C	32033	0.19085	0.10121	0.0096004	5.52e-26	CGH_AD
6	rs1543681	26187783	A	C	32352	0.466277	0.0443796	0.00757755	4.72e-09	CGH_AD
7	rs55982832	55050103	A	G	32352	0.214948	0.0558498	0.00916827	1.12e-09	CGH_AD
9	rs4879586	32427874	C	A	31341	0.236894	-0.0497115	0.00901396	3.49e-08	CGH_AD
14	rs10872846	31371437	C	G	32026	0.450025	0.049557	0.00761841	7.77e-11	CGH_AD
22	rs2267161	30953295	T	C	32352	0.309007	-0.0477807	0.0081912	5.44e-09	CGH_AD
1	rs11589479	155033308	A	G	32567	0.166503	0.0732913	0.0100836	3.64e-13	CGH_FA
2	rs11883993	54606192	T	G	32476	0.223057	-0.0502102	0.00905181	2.91e-08	CGH_FA
3	rs78691006	52580173	G	A	32427	0.0456564	0.106933	0.0179729	2.69e-09	CGH_FA
4	rs7697176	57823048	T	C	32522	0.466115	-0.0413394	0.00753527	4.11e-08	CGH_FA
5	rs17205972	82859065	T	G	32521	0.193198	-0.0662504	0.00947595	2.72e-12	CGH_FA
7	rs2248390	2855594	C	T	32537	0.435643	0.0474387	0.00759452	4.2e-10	CGH_FA
10	rs543454	131420536	T	C	32142	0.464859	0.0414975	0.00758422	4.46e-08	CGH_FA
12	rs17178006	65718299	G	T	32567	0.117588	-0.0687064	0.0116374	3.55e-09	CGH_FA
12	rs11107546	78352277	T	C	32344	0.295634	0.0468059	0.00826948	1.51e-08	CGH_FA
14	rs12888467	29235537	G	C	30057	0.475347	-0.0508587	0.00783247	8.4e-11	CGH_FA
14	rs7153940	31514057	G	T	32409	0.481255	-0.0534113	0.00753089	1.32e-12	CGH_FA
17	rs113830390	44344552	T	C	29638	0.179533	-0.0558443	0.0102333	4.84e-08	CGH_FA
19	rs34404554	45395909	G	C	32559	0.144445	-0.0586816	0.0106886	4.02e-08	CGH_FA
1	rs2780818	65307994	G	T	32244	0.224786	-0.0538156	0.00913508	3.84e-09	CGH_MD
2	rs55970645	232052494	A	G	32101	0.296907	0.0559669	0.0083633	2.2e-11	CGH_MD
3	rs11128657	13833084	C	T	31472	0.413129	-0.0446397	0.00781149	1.1e-08	CGH_MD
4	rs11133252	54102043	A	T	32294	0.365811	-0.0522215	0.00787197	3.27e-11	CGH_MD
4	rs9762564	54745703	T	C	31959	0.222254	0.0582143	0.00921074	2.61e-10	CGH_MD
4	rs6819977	185137596	C	A	32346	0.397963	-0.0436466	0.0077289	1.63e-08	CGH_MD
5	rs1867667	82779013	G	A	32325	0.261005	-0.0545118	0.00867008	3.23e-10	CGH_MD
5	rs10052710	82860025	G	T	32279	0.194755	0.140441	0.00957097	9.51e-49	CGH_MD
6	rs1543681	26187783	A	C	32346	0.466255	0.0552404	0.00764032	4.83e-13	CGH_MD
7	rs9692176	548066	G	T	30544	0.405759	-0.0440952	0.00798665	3.37e-08	CGH_MD
7	rs10244020	55108994	C	T	31517	0.474427	-0.0579455	0.00771277	5.78e-14	CGH_MD
8	rs55705857	130645692	G	A	32346	0.0556638	0.104757	0.0166045	2.81e-10	CGH_MD
11	rs4755851	44626461	G	C	32009	0.125715	0.0777168	0.0115259	1.55e-11	CGH_MD
11	rs4313591	61766569	C	T	32075	0.37986	0.0440038	0.00787609	2.31e-08	CGH_MD
11	rs34030508	82445154	C	T	32113	0.354856	-0.0447426	0.00791899	1.6e-08	CGH_MD
17	rs8082186	42661215	C	T	31694	0.32432	-0.0471785	0.00820656	8.98e-09	CGH_MD
22	rs2267158	30950360	C	T	31762	0.319061	-0.0647327	0.00826099	4.65e-15	CGH_MD
2	rs191692	60461578	A	G	31767	0.388406	0.0540495	0.00805027	1.89e-11	CGH_MO
12	rs7132783	58825468	G	A	31458	0.311701	0.053707	0.00855206	3.39e-10	CGH_MO
14	rs12888467	29235537	G	C	29855	0.475481	-0.0449529	0.00810558	2.92e-08	CGH_MO
14	rs3784160	31512352	A	G	32208	0.503151	0.0463473	0.00780159	2.84e-09	CGH_MO
2	rs2110974	66788591	A	G	31346	0.294057	0.0498503	0.00852708	5.03e-09	CGH_RD
2	rs6761645	232055153	A	T	32260	0.210803	0.0664601	0.00937817	1.37e-12	CGH_RD
4	rs11133252	54102043	A	T	32295	0.365831	-0.0507676	0.00787827	1.16e-10	CGH_RD
4	rs7697176	57823048	T	C	32302	0.466333	0.0423135	0.00763855	3.03e-08	CGH_RD
4	rs6819977	185137596	C	A	32347	0.39795	-0.0496251	0.00773534	1.4e-10	CGH_RD
5	rs1847037	81900820	T	C	31899	0.293614	0.050237	0.00844026	2.65e-09	CGH_RD
5	rs1867667	82779013	G	A	32326	0.261028	-0.0540736	0.00867672	4.6e-10	CGH_RD
5	rs10052710	82860025	G	T	32280	0.194765	0.121517	0.00957896	7.09e-37	CGH_RD
6	rs1543681	26187783	A	C	32347	0.466226	0.0434735	0.00764643	1.3e-08	CGH_RD
7	rs2248390	2855594	C	T	32317	0.435653	-0.0490655	0.0076988	1.85e-10	CGH_RD
7	rs10244020	55108994	C	T	31517	0.474395	-0.0477002	0.00771941	6.44e-10	CGH_RD
19	rs34404554	45395909	G	C	32339	0.144439	0.0641593	0.0108329	3.17e-09	CGH_RD
22	rs2267158	30950360	C	T	31763	0.319082	-0.0545941	0.00826748	4.02e-11	CGH_RD
6	rs9395049	44792718	G	A	32194	0.47703	-0.0508079	0.00780328	7.46e-11	CST_AD
11	rs2029298	47234718	C	T	32184	0.334452	0.0479447	0.00810819	3.36e-09	CST_FA
12	rs12370774	106510413	T	C	31105	0.0859347	0.0808029	0.0138527	5.44e-09	CST_FA
6	rs4714260	39536622	C	T	32258	0.378216	0.0566477	0.00802952	1.73e-12	CST_MD
6	rs9395049	44792718	G	A	32163	0.477132	-0.0675968	0.00782454	5.67e-18	CST_MD
6	rs2489623	127455821	A	C	32161	0.462035	0.0490139	0.00781501	3.57e-10	CST_MD
7	rs2952559	120920169	C	G	31832	0.175437	0.057539	0.0102983	2.31e-08	CST_MD
8	rs7012990	77261471	T	A	31809	0.285532	0.0476766	0.0086489	3.54e-08	CST_MD
8	rs4407910	119917117	G	A	32195	0.46647	-0.051016	0.00782393	7.01e-11	CST_MD
12	rs7313073	28221002	A	G	32255	0.196373	-0.0584735	0.00986327	3.06e-09	CST_MD
15	rs1550574	58213368	T	G	31868	0.453323	0.0576814	0.00786427	2.22e-13	CST_MD
1	rs61811629	180532514	G	A	31543	0.25535	0.0534291	0.00902247	3.18e-09	CST_MO
1	rs584101	182631704	C	T	32351	0.414562	-0.0459656	0.00789597	5.84e-09	CST_MO
1	rs2802827	204910356	T	A	32054	0.450973	-0.0479768	0.00784842	9.78e-10	CST_MO
3	rs2336666	52915712	T	C	32309	0.234904	-0.0511213	0.00922201	2.97e-08	CST_MO
3	rs1015470	77271011	C	T	31202	0.445821	0.0528443	0.00797504	3.44e-11	CST_MO
4	rs6841852	121057987	C	T	31793	0.343881	-0.0569514	0.00828548	6.26e-12	CST_MO
5	rs10473936	89838205	T	C	32148	0.424785	-0.043276	0.00789669	4.25e-08	CST_MO
6	rs4707462	89095222	T	A	32291	0.451689	0.0445267	0.00785046	1.41e-08	CST_MO
11	rs7108427	47044113	G	T	30279	0.338452	0.0526689	0.00852778	6.57e-10	CST_MO
12	rs11051964	32528150	T	C	30758	0.324062	0.0504366	0.00851754	3.19e-09	CST_MO
1	rs61825680	228771363	C	A	29583	0.107325	-0.0711905	0.012962	3.97e-08	CST_RD
5	rs66501867	122466283	C	G	31690	0.210713	0.052947	0.00955642	3.02e-08	CST_RD
6	rs9369127	39531474	A	T	32250	0.337426	0.0634947	0.00817148	7.83e-15	CST_RD
6	rs542444	44800015	C	T	32190	0.203044	0.0910423	0.00960672	2.62e-21	CST_RD
6	rs9491697	127456122	G	A	32065	0.467083	-0.0499102	0.00774968	1.19e-10	CST_RD
6	rs9389060	133572406	A	G	32034	0.223809	-0.0591578	0.00930124	2.01e-10	CST_RD
7	rs2952559	120920169	C	G	31842	0.175366	0.0679169	0.0101942	2.7e-11	CST_RD
8	rs4407910	119917117	G	A	32205	0.466418	-0.0587492	0.00774439	3.3e-14	CST_RD
12	rs7313073	28221002	A	G	32265	0.196389	-0.0618414	0.00976183	2.37e-10	CST_RD
12	rs12370774	106510413	T	C	30864	0.0859253	-0.0886566	0.0140444	2.74e-10	CST_RD
15	rs1550574	58213368	T	G	31878	0.453275	0.0577514	0.00778288	1.17e-13	CST_RD
2	rs2003585	37123383	T	C	32120	0.465162	0.0427454	0.00750065	1.21e-08	EC_AD
2	rs10932008	204048840	G	A	31694	0.190052	-0.0656901	0.00959746	7.67e-12	EC_AD
2	rs6761645	232055153	A	T	32189	0.210538	0.0531547	0.00917081	6.79e-09	EC_AD
3	rs6442409	13835087	T	C	31395	0.342714	-0.0440978	0.0079488	2.89e-08	EC_AD
5	rs309591	82849675	C	T	32213	0.0756061	0.12928	0.0140908	4.53e-20	EC_AD
10	rs11191772	105459834	C	T	31120	0.41197	-0.0547921	0.00771609	1.24e-12	EC_AD
11	rs7935166	44636547	A	G	32275	0.132424	0.0907141	0.0109605	1.27e-16	EC_AD
17	rs62064364	43654468	T	C	31183	0.21098	0.0718792	0.00925688	8.17e-15	EC_AD
1	rs550850	24072355	C	T	32465	0.0837055	0.075054	0.0135819	3.28e-08	EC_FA
1	rs2046616	92831569	A	G	32493	0.25147	-0.0476968	0.00869655	4.15e-08	EC_FA
1	rs4567243	182928742	C	T	32155	0.157067	-0.0605662	0.0103358	4.63e-09	EC_FA
1	rs10922201	197321451	G	A	32564	0.10765	0.0901152	0.0120978	9.41e-14	EC_FA
2	rs116357370	37573442	G	A	32399	0.0165746	0.162383	0.0294907	3.67e-08	EC_FA
2	rs3806577	206546150	C	T	31076	0.456445	0.0422512	0.00772485	4.51e-08	EC_FA
3	rs2662126	4410432	A	G	32467	0.455416	0.0414638	0.0075694	4.31e-08	EC_FA
3	rs200481589	49902948	A	T	32141	0.104928	-0.0900383	0.0123632	3.27e-13	EC_FA
4	rs4141304	97935662	A	G	32494	0.310396	-0.0794445	0.00813949	1.67e-22	EC_FA
5	rs67827860	82860485	T	C	32433	0.190963	-0.092287	0.00951627	3.08e-22	EC_FA
5	rs55837909	179078378	T	C	32419	0.442179	-0.0462774	0.00762182	1.27e-09	EC_FA
7	rs2254737	17811797	T	C	31390	0.418716	-0.0429288	0.00773689	2.88e-08	EC_FA
7	rs80263827	83660738	C	T	32369	0.156925	0.059852	0.0103234	6.72e-09	EC_FA
8	rs11786359	131431396	C	A	31976	0.299162	-0.0525803	0.00824578	1.81e-10	EC_FA
10	rs11191840	105634896	T	A	32411	0.361667	0.0440484	0.00782767	1.83e-08	EC_FA
12	rs12146713	106476805	C	T	32564	0.094844	0.0882319	0.0127746	4.96e-12	EC_FA
14	rs8017586	100655022	T	A	31765	0.261861	-0.0480044	0.00864381	2.8e-08	EC_FA
15	rs2228513	63950887	A	G	32564	0.0414108	-0.106779	0.0188178	1.39e-08	EC_FA
15	rs35116156	75292074	T	C	32514	0.502322	0.0433867	0.00749268	7.02e-09	EC_FA
17	rs8077636	79421254	T	G	32067	0.415411	0.0451715	0.00769188	4.29e-09	EC_FA
2	rs76122535	203664929	G	C	31819	0.132939	-0.0728549	0.0107019	9.92e-12	EC_MD
2	rs6761645	232055153	A	T	32092	0.210333	0.0539589	0.00891103	1.4e-09	EC_MD
3	rs6442409	13835087	T	C	31301	0.342864	-0.0523783	0.00772223	1.18e-11	EC_MD
4	rs35588958	121655414	G	T	31372	0.257236	-0.0480295	0.00842836	1.21e-08	EC_MD
5	rs251124	82805424	T	C	31263	0.159518	-0.0584033	0.0100197	5.58e-09	EC_MD
5	rs10052710	82860025	G	T	32112	0.194616	0.104472	0.00909873	1.62e-30	EC_MD
10	rs6482385	18688883	C	T	31047	0.485264	-0.0445204	0.00736562	1.5e-09	EC_MD
10	rs7079298	105447781	C	T	31441	0.463487	0.0499655	0.00735277	1.08e-11	EC_MD
10	rs911547	105639421	G	A	32033	0.135766	0.0582792	0.0105975	3.81e-08	EC_MD
11	rs7935166	44636547	A	G	32179	0.132384	0.0811397	0.0106517	2.59e-14	EC_MD
16	rs7196814	51449760	A	G	31654	0.44075	0.0422134	0.00733626	8.71e-09	EC_MD
17	rs62064364	43654468	T	C	31089	0.210814	0.0692342	0.00899528	1.4e-14	EC_MD
1	rs188579526	197374884	T	C	32255	0.105534	0.073411	0.0125301	4.66e-09	EC_MO
3	rs6781150	171019789	A	T	32140	0.466724	0.0431929	0.00775006	2.5e-08	EC_MO
4	rs4385021	49171577	T	C	30170	0.250464	-0.0500195	0.00916964	4.9e-08	EC_MO
4	rs2189574	97943856	A	G	32199	0.316765	-0.0670426	0.00830787	7.04e-16	EC_MO
5	rs4869215	93908807	T	C	32048	0.36695	-0.048812	0.00802453	1.18e-09	EC_MO
5	rs4701133	178997692	A	G	32288	0.401047	-0.0501608	0.00790305	2.2e-10	EC_MO
6	rs4897156	126100198	G	A	32187	0.478936	-0.0583222	0.00773111	4.56e-14	EC_MO
7	rs3807865	12250402	A	G	32312	0.413948	0.0426183	0.00779238	4.52e-08	EC_MO
7	rs11531492	29347245	G	A	32305	0.316019	-0.048587	0.00826999	4.23e-09	EC_MO
7	rs80263827	83660738	C	T	32155	0.157005	0.0601591	0.0105826	1.31e-08	EC_MO
8	rs17055142	26201601	T	C	32133	0.0799334	-0.0886208	0.0142923	5.62e-10	EC_MO
11	rs111790356	46402988	T	C	32078	0.112756	0.0744775	0.0122562	1.23e-09	EC_MO
14	rs1998385	100361886	T	A	32336	0.174836	-0.0586918	0.0101117	6.46e-09	EC_MO
16	rs4843553	87233185	A	C	32065	0.416732	0.0525875	0.00782301	1.79e-11	EC_MO
17	rs56305452	65990500	C	A	32349	0.211908	0.0627839	0.00945409	3.12e-11	EC_MO
19	rs9636202	18449238	A	G	31859	0.268652	-0.0551252	0.00868997	2.25e-10	EC_MO
2	rs186399184	203728984	T	C	31613	0.117309	-0.0769263	0.0113653	1.3e-11	EC_RD
2	rs6761645	232055153	A	T	32136	0.210449	0.0519113	0.00891761	5.84e-09	EC_RD
3	rs6442409	13835087	T	C	31343	0.342868	-0.0498851	0.007728	1.08e-10	EC_RD
3	rs73079033	49979174	C	T	32197	0.0982856	0.0716667	0.0122105	4.38e-09	EC_RD
4	rs6840385	97936878	T	G	32162	0.309573	0.0546778	0.00785469	3.37e-12	EC_RD
4	rs35588958	121655414	G	T	31414	0.257131	-0.0487107	0.00843569	7.72e-09	EC_RD
5	rs251124	82805424	T	C	31307	0.159469	-0.0576921	0.0100272	8.74e-09	EC_RD
5	rs10052710	82860025	G	T	32156	0.194598	0.0993274	0.00910591	1.06e-27	EC_RD
10	rs6482385	18688883	C	T	31090	0.485124	-0.0419765	0.00737245	1.24e-08	EC_RD
10	rs61000833	105447838	C	T	31832	0.411017	-0.0437902	0.00741954	3.59e-09	EC_RD
10	rs11191840	105634896	T	A	32071	0.361963	-0.0481326	0.0075504	1.83e-10	EC_RD
11	rs7935166	44636547	A	G	32223	0.13239	0.0639336	0.0106613	2.01e-09	EC_RD
12	rs12146713	106476805	C	T	32223	0.094777	-0.0701691	0.0123271	1.25e-08	EC_RD
15	rs35116156	75292074	T	C	32173	0.502549	-0.0423669	0.00722836	4.6e-09	EC_RD
16	rs7196814	51449760	A	G	31696	0.440876	0.0449761	0.00734383	9.11e-10	EC_RD
17	rs62064364	43654468	T	C	31132	0.210908	0.0600415	0.00900115	2.55e-11	EC_RD
1	rs3120122	43771660	G	A	32311	0.384606	0.0422222	0.00713827	3.32e-09	FX_AD
2	rs2346965	19184217	A	G	32304	0.151684	0.0673526	0.00967345	3.34e-12	FX_AD
3	rs6798507	71547039	G	A	31755	0.35259	0.0421955	0.00732208	8.27e-09	FX_AD
3	rs34886272	190641719	C	A	32166	0.386728	-0.0999186	0.007149	2.17e-44	FX_AD
4	rs2728137	177799618	T	C	32119	0.307559	-0.0466278	0.00753171	5.98e-10	FX_AD
7	rs798510	2783338	T	C	32260	0.296993	0.0472198	0.00762159	5.81e-10	FX_AD
9	rs10980628	113671403	C	T	32320	0.211897	-0.0470294	0.00848135	2.94e-08	FX_AD
10	rs12251016	21821918	T	A	32246	0.341112	-0.0632534	0.00732035	5.58e-18	FX_AD
12	rs12146713	106476805	C	T	32356	0.0947274	0.118877	0.0118185	8.42e-24	FX_AD
14	rs10145371	91991953	G	C	32167	0.465042	0.0632479	0.00695561	9.63e-20	FX_AD
15	rs11631804	101776416	A	G	32077	0.183496	-0.0515694	0.00900469	1.02e-08	FX_AD
16	rs4843555	87231160	T	C	32094	0.415888	-0.0663743	0.00705554	5.09e-21	FX_AD
17	rs6504266	62968339	G	A	32015	0.089786	0.0958664	0.01221	4.11e-15	FX_AD
19	rs35791293	55886019	T	C	32170	0.443286	0.060207	0.006951	4.65e-18	FX_AD
20	rs6077868	10649761	T	C	31757	0.201908	0.0680966	0.00867443	4.15e-15	FX_AD
1	rs3120047	43764084	G	C	31920	0.380028	-0.0376924	0.0068012	2.99e-08	FX_FA
2	rs72780760	19187219	G	A	32483	0.151341	-0.0636974	0.00912417	2.93e-12	FX_FA
3	rs13089287	190654424	C	T	32569	0.386334	0.0630137	0.00671748	6.56e-21	FX_FA
5	rs11741124	64933505	G	A	32524	0.254381	0.0426884	0.0075269	1.42e-08	FX_FA
7	rs798510	2783338	T	C	32473	0.297016	-0.0602235	0.00718205	5.06e-17	FX_FA
9	rs10980628	113671403	C	T	32532	0.211791	0.0569715	0.00799222	1.02e-12	FX_FA
10	rs564819152	21820650	G	A	32342	0.31725	0.0593895	0.00704626	3.5e-17	FX_FA
10	rs11005689	58957056	A	G	32163	0.334033	-0.0409319	0.00697894	4.49e-09	FX_FA
11	rs4442541	10669172	A	G	32535	0.313109	0.0424091	0.00705607	1.85e-09	FX_FA
11	rs321416	110957809	A	C	32432	0.312037	-0.0389162	0.00707602	3.8e-08	FX_FA
12	rs12146713	106476805	C	T	32569	0.0948448	-0.108455	0.0111309	1.96e-22	FX_FA
14	rs1961541	91894819	T	C	32240	0.444634	-0.0482299	0.00659967	2.71e-13	FX_FA
16	rs4843555	87231160	T	C	32306	0.416006	0.0534901	0.0066471	8.48e-16	FX_FA
22	rs4821706	38154690	G	A	32095	0.285901	-0.0403735	0.00729334	3.1e-08	FX_FA
1	rs3120122	43771660	G	A	32311	0.384606	0.0389902	0.00709234	3.85e-08	FX_MD
2	rs2346965	19184217	A	G	32304	0.151684	0.0728902	0.0096112	3.35e-14	FX_MD
3	rs34859790	190652830	T	C	32309	0.38644	-0.0933126	0.00708646	1.35e-39	FX_MD
7	rs798510	2783338	T	C	32260	0.296993	0.0518758	0.00757255	7.36e-12	FX_MD
9	rs10980628	113671403	C	T	32320	0.211897	-0.0542771	0.00842677	1.19e-10	FX_MD
10	rs550532200	21820652	C	A	32131	0.317357	-0.0652186	0.00743214	1.71e-18	FX_MD
12	rs12146713	106476805	C	T	32356	0.0947274	0.121275	0.0117424	5.27e-25	FX_MD
14	rs1961540	91894792	G	A	32028	0.451652	0.0608986	0.00695421	2e-18	FX_MD
16	rs4843555	87231160	T	C	32094	0.415888	-0.066053	0.00701013	4.4e-21	FX_MD
17	rs11650325	62972381	C	T	32197	0.0921514	0.0924058	0.0119457	1.03e-14	FX_MD
19	rs35791293	55886019	T	C	32170	0.443286	0.0558094	0.00690627	6.43e-16	FX_MD
20	rs6077868	10649761	T	C	31757	0.201908	0.0646783	0.00861861	6.17e-14	FX_MD
22	rs4821706	38154690	G	A	31886	0.28569	0.0447786	0.00769129	5.82e-09	FX_MD
2	rs884894	19184881	T	C	32238	0.151917	-0.0720257	0.0102957	2.64e-12	FX_MO
2	rs2579605	120265080	G	C	30456	0.408031	0.0441671	0.00778073	1.38e-08	FX_MO
3	rs61067594	190650833	A	G	31673	0.389401	0.0532636	0.00764531	3.24e-12	FX_MO
7	rs798508	2783815	G	C	32134	0.297815	-0.0611028	0.00811633	5.14e-14	FX_MO
9	rs4978966	113662374	T	C	32215	0.211578	0.0568898	0.00904323	3.16e-10	FX_MO
10	rs2026092	21911657	A	G	32108	0.297107	0.0504688	0.00810473	4.75e-10	FX_MO
12	rs12146713	106476805	C	T	32238	0.0947639	-0.109275	0.0125975	4.16e-18	FX_MO
16	rs9933149	87226206	T	C	32238	0.379257	0.0564046	0.00761441	1.29e-13	FX_MO
2	rs72780760	19187219	G	A	32286	0.151567	0.0742035	0.00962586	1.27e-14	FX_RD
3	rs34859790	190652830	T	C	32324	0.386431	-0.0890094	0.0070954	4.25e-36	FX_RD
7	rs798508	2783815	G	C	32267	0.297812	0.0533696	0.00757616	1.86e-12	FX_RD
9	rs10980628	113671403	C	T	32335	0.211876	-0.0557172	0.0084361	3.99e-11	FX_RD
10	rs1243179	21912579	G	A	32225	0.304562	-0.0655606	0.00751082	2.57e-18	FX_RD
12	rs12146713	106476805	C	T	32371	0.0947144	0.12086	0.0117544	8.48e-25	FX_RD
14	rs1961540	91894792	G	A	32043	0.451612	0.0593453	0.00696204	1.54e-17	FX_RD
16	rs4843555	87231160	T	C	32109	0.415927	-0.0653733	0.00701732	1.21e-20	FX_RD
17	rs11650325	62972381	C	T	32212	0.0921396	0.0907214	0.01196	3.31e-14	FX_RD
19	rs35791293	55886019	T	C	32185	0.44325	0.0536943	0.00691452	8.14e-15	FX_RD
20	rs6077868	10649761	T	C	31771	0.201945	0.0614026	0.00862873	1.11e-12	FX_RD
22	rs4821706	38154690	G	A	31901	0.285681	0.0440384	0.00770063	1.07e-08	FX_RD
2	rs12478822	37048951	C	G	31944	0.434432	0.046407	0.00740387	3.66e-10	FXST_AD
5	rs10052710	82860025	G	T	32284	0.194756	0.0647842	0.00916962	1.61e-12	FXST_AD
6	rs9266252	31325822	G	A	32109	0.298001	-0.0465288	0.0079684	5.25e-09	FXST_AD
8	rs73709918	119339228	A	G	32351	0.0122716	-0.190657	0.0332379	9.69e-09	FXST_AD
1	rs1417121	243669350	C	G	32411	0.26707	0.0522703	0.00799826	6.35e-11	FXST_FA
2	rs2754523	32837110	G	A	32347	0.445126	0.0394115	0.00710153	2.86e-08	FXST_FA
2	rs3770778	37144195	A	T	31664	0.456117	0.0419548	0.00718798	5.32e-09	FXST_FA
3	rs7371912	30472786	A	G	32348	0.311719	0.0421941	0.00764995	3.48e-08	FXST_FA
3	rs73079018	49875327	C	T	32453	0.105984	-0.0887642	0.0115178	1.29e-14	FXST_FA
3	rs1905346	88888613	T	C	32399	0.344563	-0.0476463	0.00743338	1.46e-10	FXST_FA
5	rs72764483	64962816	G	A	32522	0.254428	0.0513698	0.0081117	2.41e-10	FXST_FA
7	rs323178	29156459	T	A	32444	0.147115	-0.0663394	0.00997176	2.88e-11	FXST_FA
8	rs2607620	24624746	C	T	32212	0.2552	0.0492573	0.00810459	1.22e-09	FXST_FA
12	rs17779523	66998701	C	A	31632	0.368519	0.0414353	0.00740665	2.21e-08	FXST_FA
13	rs541731	80919712	T	C	31594	0.380911	0.0407636	0.00737073	3.19e-08	FXST_FA
13	rs1078514	110463168	T	C	32162	0.327358	0.0414852	0.00754089	3.77e-08	FXST_FA
16	rs17703104	69428761	T	C	32463	0.252056	0.0450372	0.00812186	2.94e-08	FXST_FA
17	rs17665188	44357351	C	T	31281	0.212237	-0.0673669	0.00876359	1.5e-14	FXST_FA
18	rs4799450	35028901	T	C	32408	0.363706	-0.0648022	0.00736745	1.42e-18	FXST_FA
22	rs388371	22020694	T	C	32041	0.406526	0.0402094	0.00724725	2.89e-08	FXST_FA
3	rs6442411	13836296	T	C	32010	0.396095	-0.0434809	0.00767891	1.49e-08	FXST_MD
5	rs10052710	82860025	G	T	32281	0.194774	0.107981	0.00942216	2.09e-30	FXST_MD
6	rs72834696	26161399	A	G	32336	0.226883	0.0514581	0.00896235	9.38e-09	FXST_MD
6	rs9266252	31325822	G	A	32106	0.298013	-0.0535864	0.00818793	5.97e-11	FXST_MD
7	rs9692176	548066	G	T	30545	0.405729	-0.0454727	0.00786242	7.31e-09	FXST_MD
3	rs73080976	50187326	A	G	32320	0.0807859	-0.0942976	0.0128677	2.33e-13	FXST_MO
3	rs1905346	88888613	T	C	32185	0.344633	-0.0543308	0.00737774	1.78e-13	FXST_MO
8	rs1865291	120676908	A	G	31968	0.431275	-0.0390672	0.0071107	3.93e-08	FXST_MO
9	rs4878773	38232513	A	G	31817	0.132256	-0.0595204	0.0104057	1.07e-08	FXST_MO
14	rs10148294	31361742	T	A	31327	0.450362	0.0392868	0.00713004	3.59e-08	FXST_MO
17	rs62055696	43758125	G	A	31862	0.213766	-0.0506851	0.00856548	3.27e-09	FXST_MO
3	rs6446218	49075513	A	T	31927	0.343534	0.0520724	0.0076591	1.06e-11	FXST_RD
4	rs2172442	4762383	G	C	31855	0.320075	0.0454774	0.00776373	4.69e-09	FXST_RD
5	rs67827860	82860485	T	C	32220	0.191046	0.0918789	0.00914859	9.87e-24	FXST_RD
6	rs72834696	26161399	A	G	32338	0.226838	0.0479687	0.00863227	2.75e-08	FXST_RD
8	rs2976933	8254875	T	C	32113	0.433236	0.0401739	0.00732429	4.13e-08	FXST_RD
8	rs55705857	130645692	G	A	32350	0.0556569	0.105751	0.0157449	1.86e-11	FXST_RD
13	rs11911	80910851	C	A	32350	0.394544	-0.0431471	0.00735987	4.56e-09	FXST_RD
13	rs9521510	110426871	C	T	31880	0.321142	-0.047389	0.00776747	1.05e-09	FXST_RD
13	rs2993305	113678830	C	T	31932	0.338814	0.0425476	0.00768887	3.14e-08	FXST_RD
17	rs55938136	43798360	G	A	32342	0.222049	0.0636721	0.00866324	1.99e-13	FXST_RD
17	rs199504	44861003	C	T	32187	0.214745	0.069708	0.00879335	2.24e-15	FXST_RD
18	rs4799450	35028901	T	C	32190	0.363638	0.0579263	0.00754688	1.65e-14	FXST_RD
19	rs1476505	19035370	C	G	31422	0.205079	0.050263	0.00907726	3.07e-08	FXST_RD
1	rs2780902	65329100	T	C	32189	0.223788	-0.0502511	0.00875601	9.52e-09	GCC_AD
2	rs62132522	37079583	C	T	31942	0.42369	-0.0406712	0.00743862	4.56e-08	GCC_AD
3	rs6442409	13835087	T	C	31467	0.342549	-0.0669043	0.00777255	7.45e-18	GCC_AD
3	rs11915211	39592715	C	T	32194	0.226548	0.0494997	0.0087307	1.43e-08	GCC_AD
3	rs3772934	115417865	T	C	31965	0.268763	-0.0461598	0.00824865	2.19e-08	GCC_AD
4	rs34722008	38659594	A	G	31976	0.359457	0.0462137	0.00762951	1.38e-09	GCC_AD
4	rs7699124	54212467	G	C	31767	0.347373	-0.0424466	0.00769582	3.48e-08	GCC_AD
5	rs2591453	82717885	A	G	30595	0.394819	-0.0491886	0.0076738	1.46e-10	GCC_AD
5	rs17205972	82859065	T	G	32304	0.193273	0.111437	0.00917631	6.17e-34	GCC_AD
5	rs4150221	139719991	C	T	32291	0.265864	-0.0484373	0.00824734	4.28e-09	GCC_AD
6	rs112563428	34800435	T	C	32274	0.115852	-0.0673355	0.0113293	2.79e-09	GCC_AD
7	rs10237233	117614923	C	A	32272	0.408016	-0.0597329	0.00745311	1.11e-15	GCC_AD
9	rs10983453	119761715	G	A	32325	0.177077	0.0552211	0.00950338	6.22e-09	GCC_AD
10	rs740600	118651882	T	C	32085	0.248527	0.0471587	0.00845145	2.41e-08	GCC_AD
11	rs12800954	10494132	G	A	32014	0.201474	0.0731421	0.00913344	1.16e-15	GCC_AD
11	rs2303865	44636833	A	G	32305	0.131884	0.0723025	0.0107405	1.68e-11	GCC_AD
12	rs73178508	102300977	T	C	32085	0.107044	-0.0723618	0.011847	1.01e-09	GCC_AD
17	rs7225002	44189067	G	A	32184	0.413684	0.0469748	0.00740762	2.28e-10	GCC_AD
19	rs62125958	3289081	T	G	32176	0.123726	-0.0612318	0.0110795	3.27e-08	GCC_AD
2	rs4953883	134253001	G	T	31960	0.487469	0.0403405	0.00738845	4.76e-08	GCC_FA
2	rs1446468	164963486	T	C	32160	0.454307	0.0411239	0.00738533	2.57e-08	GCC_FA
2	rs76122535	203664929	G	C	32183	0.132787	0.0632779	0.0108222	5e-09	GCC_FA
2	rs7590302	217330901	C	T	32342	0.306088	0.0502962	0.00795874	2.62e-10	GCC_FA
3	rs4676643	39578904	T	A	32426	0.203633	0.0510889	0.00909025	1.91e-08	GCC_FA
3	rs62283130	141700316	C	G	32231	0.261053	0.0485017	0.00839566	7.6e-09	GCC_FA
4	rs6827414	38650464	T	C	32169	0.359399	-0.0457276	0.00766223	2.4e-09	GCC_FA
5	rs3852188	82858014	G	C	32226	0.1907	-0.0790666	0.00930316	1.91e-17	GCC_FA
5	rs4150197	139726292	T	C	32219	0.25921	0.0780814	0.00840049	1.47e-20	GCC_FA
5	rs2339448	171911683	A	G	30136	0.479244	-0.0413937	0.00758965	4.93e-08	GCC_FA
6	rs41269265	27425349	C	T	32548	0.114047	0.0768487	0.0114865	2.23e-11	GCC_FA
8	rs55705857	130645692	G	A	32548	0.0556563	-0.109304	0.015951	7.26e-12	GCC_FA
8	rs7016860	145000221	A	G	32509	0.424682	0.0556062	0.00738835	5.22e-14	GCC_FA
9	rs10120688	22056499	A	G	32280	0.485316	0.0462712	0.00738816	3.78e-10	GCC_FA
9	rs3789283	118959731	G	A	32349	0.42159	-0.0414473	0.00741724	2.3e-08	GCC_FA
12	rs10744763	121883642	T	C	32300	0.392523	0.0440596	0.00748929	4.03e-09	GCC_FA
16	rs9888842	7276695	T	C	32141	0.103015	-0.0673469	0.0121566	3.03e-08	GCC_FA
17	rs112123127	43785098	T	C	32236	0.217257	-0.0733403	0.0088854	1.53e-16	GCC_FA
22	rs2413493	38448295	C	G	32058	0.404735	-0.0567241	0.00747205	3.16e-14	GCC_FA
1	rs2780902	65329100	T	C	32167	0.223785	-0.04978	0.00845248	3.88e-09	GCC_MD
2	rs7590302	217330901	C	T	32123	0.306151	-0.0424377	0.00764911	2.89e-08	GCC_MD
3	rs6442411	13836296	T	C	31989	0.396074	-0.0514131	0.00720229	9.44e-13	GCC_MD
3	rs1456330	183400967	G	A	31653	0.252125	-0.0461694	0.00818323	1.68e-08	GCC_MD
4	rs6827414	38650464	T	C	31952	0.359258	0.0575357	0.00736705	5.72e-15	GCC_MD
4	rs4385132	54210482	T	A	31992	0.350056	-0.0518431	0.00739107	2.31e-12	GCC_MD
5	rs33599	82774904	A	G	32259	0.261415	-0.0525142	0.00800612	5.41e-11	GCC_MD
5	rs17205972	82859065	T	G	32282	0.193204	0.117831	0.00885964	2.32e-40	GCC_MD
5	rs4150221	139719991	C	T	32269	0.265812	-0.0776879	0.00796307	1.74e-22	GCC_MD
6	rs1543681	26187783	A	C	32327	0.466267	0.0451792	0.00705421	1.51e-10	GCC_MD
6	rs6907508	34592090	G	A	32266	0.114842	-0.063532	0.0109804	7.21e-09	GCC_MD
7	rs1800814	540741	A	G	31972	0.483955	-0.0437952	0.00706584	5.71e-10	GCC_MD
7	rs76928645	54941328	T	C	31854	0.101196	0.0687288	0.0117154	4.45e-09	GCC_MD
7	rs2402273	117600424	C	T	31813	0.407884	-0.0464364	0.00724521	1.46e-10	GCC_MD
8	rs55705857	130645692	G	A	32327	0.0556501	0.10317	0.0153328	1.71e-11	GCC_MD
8	rs6984820	144993324	T	C	32047	0.423066	-0.0582495	0.00713553	3.26e-16	GCC_MD
9	rs10120688	22056499	A	G	32061	0.485184	-0.0493902	0.00710039	3.5e-12	GCC_MD
11	rs12805704	1626985	A	T	32299	0.1977	-0.0492621	0.00882353	2.36e-08	GCC_MD
11	rs2303865	44636833	A	G	32283	0.131881	0.0665737	0.0103701	1.36e-10	GCC_MD
12	rs9795600	121924332	G	T	32103	0.4641	-0.0478116	0.00705737	1.25e-11	GCC_MD
17	rs55938136	43798360	G	A	32319	0.222037	0.0728467	0.00843539	5.83e-18	GCC_MD
17	rs199504	44861003	C	T	32164	0.214728	0.0773735	0.00856215	1.61e-19	GCC_MD
19	rs546308	49223570	G	A	32136	0.392333	-0.0396808	0.00720817	3.69e-08	GCC_MD
22	rs2267161	30953295	T	C	32327	0.30903	-0.0418233	0.00762523	4.14e-08	GCC_MD
22	rs8141150	31800336	T	C	32263	0.292006	0.0439504	0.00772639	1.28e-08	GCC_MD
22	rs1004763	38474952	C	T	32327	0.420361	0.0435346	0.00711726	9.55e-10	GCC_MD
1	rs1416823	180496582	A	G	31967	0.316123	-0.0480231	0.00836656	9.47e-09	GCC_MO
2	rs17443495	37117502	C	G	32270	0.420236	-0.0451731	0.00786678	9.34e-09	GCC_MO
3	rs35241115	115371483	G	C	30864	0.285835	0.0570817	0.00877519	7.77e-11	GCC_MO
6	rs200993	27814670	A	G	29642	0.189124	0.0568021	0.0103358	3.89e-08	GCC_MO
7	rs1182155	2902890	C	G	31737	0.299571	-0.0499121	0.00852984	4.87e-09	GCC_MO
7	rs10282032	117628555	T	C	32125	0.408062	-0.055035	0.00792701	3.85e-12	GCC_MO
1	rs12565436	67161638	T	C	32292	0.0947913	-0.0684615	0.0121891	1.95e-08	GCC_RD
2	rs6748809	98391355	C	T	32109	0.315612	0.042135	0.00769379	4.34e-08	GCC_RD
2	rs1446468	164963486	T	C	31928	0.454194	-0.0406788	0.00719836	1.59e-08	GCC_RD
2	rs7590302	217330901	C	T	32108	0.30617	-0.0487958	0.00775912	3.2e-10	GCC_RD
4	rs6827414	38650464	T	C	31937	0.359348	0.0554444	0.00747177	1.17e-13	GCC_RD
4	rs6554068	54032319	G	A	32264	0.374985	-0.0439876	0.00733458	2.01e-09	GCC_RD
5	rs33599	82774904	A	G	32244	0.261366	-0.0473486	0.00812207	5.56e-09	GCC_RD
5	rs17205972	82859065	T	G	32267	0.193216	0.0996464	0.00898686	1.43e-28	GCC_RD
5	rs4150221	139719991	C	T	32254	0.265765	-0.0794525	0.00807641	7.75e-23	GCC_RD
6	rs1543681	26187783	A	C	32312	0.466359	0.0470579	0.00715498	4.8e-11	GCC_RD
6	rs3020581	31351549	G	A	32296	0.429093	-0.0429893	0.00720121	2.38e-09	GCC_RD
7	rs1800814	540741	A	G	31957	0.4839	-0.0416138	0.00716747	6.4e-09	GCC_RD
8	rs55705857	130645692	G	A	32312	0.0556295	0.106014	0.0155546	9.39e-12	GCC_RD
8	rs6984820	144993324	T	C	32033	0.423048	-0.0609896	0.0072377	3.56e-17	GCC_RD
9	rs10120688	22056499	A	G	32046	0.485209	-0.0490781	0.00720224	9.47e-12	GCC_RD
10	rs7893954	104318966	G	A	32312	0.286565	0.0435194	0.00790679	3.71e-08	GCC_RD
12	rs10744763	121883642	T	C	32066	0.392222	-0.0481904	0.00730209	4.12e-11	GCC_RD
17	rs199501	44862613	A	G	32312	0.234093	0.0739641	0.00841418	1.49e-18	GCC_RD
22	rs1004763	38474952	C	T	32312	0.420262	0.0505847	0.00721931	2.44e-12	GCC_RD
2	rs2713546	227177546	A	C	32329	0.495283	0.0742351	0.00777392	1.31e-21	IFO_AD
4	rs74730033	96796951	C	T	31904	0.104376	0.0782806	0.012769	8.76e-10	IFO_AD
4	rs263071	96906564	T	A	31265	0.208908	-0.0648971	0.0097328	2.6e-11	IFO_AD
4	rs13121156	97918159	C	T	31677	0.313571	-0.0546788	0.00846139	1.03e-10	IFO_AD
5	rs13164785	82861400	G	T	32140	0.191164	0.0858649	0.00983264	2.49e-18	IFO_AD
7	rs12707607	83697483	A	G	31443	0.312104	0.0541471	0.00848568	1.76e-10	IFO_AD
8	rs9828	23118155	C	T	31180	0.438967	0.0443902	0.00794195	2.28e-08	IFO_AD
11	rs4755851	44626461	G	C	32016	0.125734	0.080672	0.0117325	6.16e-12	IFO_AD
16	rs12711472	87224132	A	C	31985	0.378443	0.0555595	0.00802523	4.42e-12	IFO_AD
17	rs62070952	44309255	A	C	29866	0.184708	0.0841914	0.0103866	5.24e-16	IFO_AD
2	rs13399695	58309730	T	G	32409	0.267534	0.0520008	0.00873444	2.62e-09	IFO_FA
2	rs2713546	227177546	A	C	32545	0.495253	0.0622521	0.00774501	9.15e-16	IFO_FA
4	rs74730033	96796951	C	T	32120	0.104203	0.0839969	0.0127274	4.12e-11	IFO_FA
4	rs263071	96906564	T	A	31473	0.208814	-0.0810833	0.00970062	6.35e-17	IFO_FA
4	rs2214554	97939225	A	T	32443	0.31076	-0.092497	0.0083726	2.25e-28	IFO_FA
4	rs12648010	128152633	G	A	32055	0.131493	0.0651924	0.011496	1.42e-08	IFO_FA
5	rs7733216	82857870	C	T	32060	0.198409	-0.0652509	0.0097266	1.97e-11	IFO_FA
7	rs80263827	83660738	C	T	32374	0.156947	0.0915933	0.0106189	6.38e-18	IFO_FA
7	rs201485	101748958	G	A	32554	0.407523	-0.044372	0.00781014	1.34e-08	IFO_FA
7	rs4731368	127180667	A	G	32381	0.227217	-0.0534679	0.00924345	7.28e-09	IFO_FA
8	rs3088186	10226355	T	C	32569	0.312736	0.0566281	0.00831992	1e-11	IFO_FA
9	rs616906	13688666	G	A	32187	0.337838	0.0454766	0.00822029	3.16e-08	IFO_FA
14	rs35522344	100283856	T	C	32401	0.38417	-0.0434374	0.00795606	4.77e-08	IFO_FA
15	rs12911569	43597297	A	T	32223	0.19168	-0.0627952	0.00985735	1.89e-10	IFO_FA
1	rs2780818	65307994	G	T	32240	0.224783	-0.0614828	0.00915628	1.88e-11	IFO_MD
3	rs6442409	13835087	T	C	31461	0.342631	-0.0581092	0.00814462	9.7e-13	IFO_MD
5	rs251124	82805424	T	C	31424	0.159591	-0.0665146	0.0105611	3.01e-10	IFO_MD
5	rs10052710	82860025	G	T	32275	0.194717	0.130993	0.00959258	1.87e-42	IFO_MD
6	rs2393593	26285683	T	C	32342	0.467504	-0.0508936	0.00763902	2.7e-11	IFO_MD
11	rs7935166	44636547	A	G	32342	0.13249	0.0981351	0.0112243	2.27e-18	IFO_MD
1	rs3790459	156461707	A	T	32201	0.347381	-0.0553716	0.00820577	1.5e-11	IFO_MO
3	rs9846552	104705960	C	T	32167	0.452995	0.0483307	0.00786942	8.17e-10	IFO_MO
4	rs1396112	41091795	T	A	32151	0.244767	0.0498442	0.00908589	4.11e-08	IFO_MO
4	rs11736743	97567606	C	T	31881	0.437204	0.0464697	0.0079804	5.78e-09	IFO_MO
9	rs34845422	85048566	C	T	32192	0.267054	0.0556931	0.00885144	3.13e-10	IFO_MO
12	rs1024905	4518140	G	C	32247	0.474354	-0.0433106	0.00781149	2.95e-08	IFO_MO
16	rs4843550	87236383	G	C	31935	0.430719	0.0598133	0.00791015	3.98e-14	IFO_MO
17	rs4790877	1995254	G	A	31951	0.414525	-0.0511413	0.00799196	1.56e-10	IFO_MO
17	rs12451721	65939075	A	G	32307	0.190764	0.0703956	0.00994142	1.43e-12	IFO_MO
3	rs4685022	13832611	A	G	31136	0.342016	-0.0495995	0.00825175	1.85e-09	IFO_RD
4	rs263071	96906564	T	A	31259	0.208884	0.058617	0.00965562	1.27e-09	IFO_RD
4	rs7659379	97922549	T	C	32166	0.307312	0.0753554	0.00837518	2.31e-19	IFO_RD
5	rs251124	82805424	T	C	31429	0.159566	-0.0588435	0.0106422	3.22e-08	IFO_RD
5	rs7733216	82857870	C	T	31843	0.198411	0.103229	0.00968192	1.53e-26	IFO_RD
7	rs80263827	83660738	C	T	32153	0.157015	-0.0696282	0.0105703	4.48e-11	IFO_RD
8	rs755856	10736552	C	G	32347	0.365072	-0.0498736	0.00799817	4.5e-10	IFO_RD
8	rs59845081	123844429	A	G	30450	0.245944	-0.0516221	0.00924234	2.33e-08	IFO_RD
11	rs2303865	44636833	A	G	32303	0.13183	0.0644623	0.0113425	1.32e-08	IFO_RD
15	rs7177892	43613369	C	T	32016	0.191748	0.0566709	0.0098139	7.72e-09	IFO_RD
2	rs7596872	56128091	A	C	32096	0.0984235	0.0790029	0.0122989	1.33e-10	PCR_AD
3	rs71318332	183354008	A	G	32290	0.16087	-0.0551172	0.00990901	2.66e-08	PCR_AD
5	rs17205972	82859065	T	G	32255	0.193272	0.0943535	0.00918762	9.66e-25	PCR_AD
6	rs13437444	28070998	T	C	32300	0.220062	-0.058156	0.00878911	3.67e-11	PCR_AD
6	rs275350	151016058	C	G	32158	0.412261	0.0414093	0.00741132	2.31e-08	PCR_AD
8	rs181292	28543625	C	T	32148	0.270826	-0.0456715	0.00822558	2.82e-08	PCR_AD
11	rs7112321	10471218	T	C	32076	0.465816	0.0424057	0.00734341	7.71e-09	PCR_AD
11	rs2585753	19895756	G	C	32079	0.219676	0.0615313	0.00878651	2.51e-12	PCR_AD
16	rs12711473	87224293	A	G	31946	0.378373	-0.0455654	0.00754838	1.58e-09	PCR_AD
17	rs17745948	42885466	T	C	32294	0.169521	-0.0552651	0.00973542	1.37e-08	PCR_AD
17	rs62086903	66016006	C	T	31539	0.226703	0.0513364	0.00879026	5.22e-09	PCR_AD
1	rs7549876	43760236	T	G	29351	0.366495	0.0481002	0.00850601	1.56e-08	PCR_FA
4	rs181508741	54005383	T	C	31987	0.0332635	0.12844	0.0219788	5.1e-09	PCR_FA
5	rs33599	82774904	A	G	32493	0.261241	0.0687891	0.00886101	8.29e-15	PCR_FA
5	rs3852188	82858014	G	C	32240	0.190819	-0.107326	0.00988756	1.9e-27	PCR_FA
6	rs3129787	29048689	T	A	32321	0.286254	0.048859	0.00866227	1.7e-08	PCR_FA
10	rs1822861	49834326	G	T	32562	0.492583	-0.0494061	0.00779117	2.28e-10	PCR_FA
12	rs12146713	106476805	C	T	32562	0.0948345	0.0765889	0.013232	7.12e-09	PCR_FA
12	rs34421054	118437058	T	C	30823	0.277552	-0.0605034	0.00893646	1.28e-11	PCR_FA
13	rs9567402	44860118	G	A	31891	0.326613	0.0483013	0.00834978	7.26e-09	PCR_FA
16	rs4843560	87225143	A	G	32309	0.379028	-0.0543756	0.00803698	1.33e-11	PCR_FA
16	rs17719345	89911681	C	G	32315	0.199954	0.0581168	0.00976666	2.67e-09	PCR_FA
17	rs7216587	42947314	C	T	32562	0.161216	0.0610468	0.0105972	8.38e-09	PCR_FA
22	rs760975	38467784	G	C	32291	0.380865	-0.0535288	0.00802512	2.56e-11	PCR_FA
1	rs61788402	59318098	G	C	32157	0.108375	-0.068553	0.011966	1.01e-08	PCR_MD
2	rs7596872	56128091	A	C	31999	0.0983156	0.0797547	0.0125432	2.04e-10	PCR_MD
3	rs554632245	183374693	A	G	30231	0.225762	-0.0541772	0.0091803	3.6e-09	PCR_MD
4	rs17082654	54243141	G	A	32026	0.151799	-0.070426	0.0103883	1.21e-11	PCR_MD
5	rs33599	82774904	A	G	32135	0.261211	-0.0732069	0.0084677	5.36e-18	PCR_MD
5	rs3852188	82858014	G	C	31886	0.190711	0.129475	0.00945466	1.1e-42	PCR_MD
6	rs3129787	29048689	T	A	31965	0.286689	-0.0645492	0.00828037	6.42e-15	PCR_MD
6	rs6921229	112148293	T	C	32046	0.138504	-0.0605491	0.0107388	1.72e-08	PCR_MD
7	rs111219357	518187	C	A	29581	0.404753	-0.0497001	0.00788197	2.87e-10	PCR_MD
7	rs6461389	18907030	T	C	32054	0.345308	-0.047673	0.00782014	1.09e-09	PCR_MD
7	rs77126132	54966738	A	G	31903	0.0909632	0.0743995	0.0129709	9.7e-09	PCR_MD
8	rs372295105	122469206	C	T	30486	0.285262	0.0511624	0.00850817	1.82e-09	PCR_MD
8	rs55705857	130645692	G	A	32203	0.0555538	0.0953537	0.0162296	4.22e-09	PCR_MD
10	rs3910909	49844458	T	C	31843	0.486371	0.0435188	0.00748924	6.22e-09	PCR_MD
10	rs10883931	105623955	T	C	32066	0.423221	0.0494485	0.00754813	5.71e-11	PCR_MD
11	rs2585782	19868377	G	A	32105	0.315543	0.0459381	0.00797755	8.49e-09	PCR_MD
11	rs17144112	82403830	C	T	32117	0.108681	-0.0669383	0.0119407	2.07e-08	PCR_MD
17	rs7216587	42947314	C	T	32203	0.161072	-0.0734314	0.0101351	4.32e-13	PCR_MD
17	rs9899380	43173131	C	G	31628	0.425193	-0.0439061	0.00760878	7.91e-09	PCR_MD
17	rs62086903	66016006	C	T	31445	0.226634	0.0582206	0.00896139	8.2e-11	PCR_MD
19	rs79569934	5900471	T	C	32203	0.133916	-0.060501	0.010783	2.01e-08	PCR_MD
22	rs59731356	30764664	C	T	32144	0.324788	-0.054738	0.00797862	6.86e-12	PCR_MD
22	rs742396	38452254	C	G	32167	0.374949	0.0461649	0.00766565	1.72e-09	PCR_MD
1	rs3789586	51054322	T	C	32221	0.150197	-0.0591075	0.0105041	1.83e-08	PCR_MO
3	rs9860128	73230382	A	G	31835	0.347275	-0.0524491	0.00792249	3.59e-11	PCR_MO
3	rs9842055	190678743	G	T	30613	0.434423	-0.0550521	0.0077724	1.41e-12	PCR_MO
5	rs1834935	116731852	A	C	31980	0.476986	-0.0499946	0.00751281	2.84e-11	PCR_MO
7	rs368699386	2803883	C	T	30096	0.263307	0.0671151	0.00884902	3.34e-14	PCR_MO
9	rs10980628	113671403	C	T	32316	0.211892	-0.0537264	0.00914455	4.22e-09	PCR_MO
9	rs1861881	119312256	T	G	32084	0.312991	-0.0454651	0.00808263	1.85e-08	PCR_MO
10	rs11012732	21830104	G	A	32224	0.329382	-0.0611952	0.00797239	1.64e-14	PCR_MO
10	rs4418728	94839724	T	G	32319	0.447368	-0.0437028	0.00751477	6.04e-09	PCR_MO
11	rs34077344	111025039	A	T	32203	0.0466416	-0.109255	0.0178449	9.21e-10	PCR_MO
12	rs11175791	65905380	A	G	32332	0.134402	0.0603686	0.0109951	4.01e-08	PCR_MO
12	rs12146713	106476805	C	T	32352	0.0947391	0.0736821	0.012741	7.33e-09	PCR_MO
12	rs7310615	111865049	C	G	31803	0.480725	0.0474952	0.00753291	2.88e-10	PCR_MO
16	rs9308344	87224930	C	G	32146	0.328983	-0.074887	0.00798794	6.92e-21	PCR_MO
17	rs1467258	38216487	G	A	32352	0.147858	-0.0578951	0.0105346	3.89e-08	PCR_MO
18	rs78830989	40244517	A	C	30533	0.22474	0.0547133	0.00921457	2.89e-09	PCR_MO
20	rs6029630	39958849	T	C	32334	0.396796	0.044228	0.00766376	7.88e-09	PCR_MO
3	rs554632245	183374693	A	G	30257	0.225683	-0.0528169	0.00941587	2.03e-08	PCR_RD
4	rs17082654	54243141	G	A	32054	0.151822	-0.0697771	0.0106511	5.71e-11	PCR_RD
5	rs33599	82774904	A	G	32163	0.26117	-0.0781656	0.00868495	2.25e-19	PCR_RD
5	rs3852188	82858014	G	C	31913	0.190769	0.128037	0.00969454	7.98e-40	PCR_RD
6	rs3129787	29048689	T	A	31993	0.286641	-0.0637468	0.00849156	6.05e-14	PCR_RD
7	rs9692176	548066	G	T	30440	0.405437	-0.0483008	0.0079969	1.54e-09	PCR_RD
7	rs12700001	18904400	G	C	31883	0.377882	-0.0462082	0.00789957	4.93e-09	PCR_RD
8	rs72673629	120931207	G	A	31413	0.437876	0.0459355	0.00779051	3.72e-09	PCR_RD
8	rs2891901	122471168	A	G	31381	0.293107	0.0471478	0.00853122	3.27e-08	PCR_RD
10	rs2377523	49843196	A	G	31864	0.485972	0.0517367	0.00768054	1.63e-11	PCR_RD
10	rs61000833	105447838	C	T	31840	0.410898	-0.0521011	0.00780805	2.51e-11	PCR_RD
10	rs11191829	105614452	T	G	32119	0.363835	-0.0474615	0.00792822	2.15e-09	PCR_RD
11	rs523153	95570961	A	G	32086	0.420713	0.0431656	0.0077606	2.66e-08	PCR_RD
12	rs11068773	118443690	A	G	32153	0.378689	0.0474747	0.00787046	1.62e-09	PCR_RD
16	rs17719345	89911681	C	G	31986	0.199681	-0.0523655	0.00958068	4.61e-08	PCR_RD
17	rs7216587	42947314	C	T	32231	0.161134	-0.0676597	0.0103924	7.49e-11	PCR_RD
22	rs59731356	30764664	C	T	32172	0.324863	-0.0499537	0.0081813	1.02e-09	PCR_RD
22	rs760975	38467784	G	C	31962	0.380749	0.0519761	0.00787291	4.06e-11	PCR_RD
1	rs34740989	21316782	T	C	32268	0.450772	0.0470179	0.00752181	4.08e-10	PLIC_AD
1	rs2369633	205181062	T	C	32252	0.0908626	0.0737686	0.0130717	1.67e-08	PLIC_AD
2	rs1017368	134250093	A	G	31880	0.461873	0.0456563	0.00757462	1.66e-09	PLIC_AD
3	rs11706071	39492246	A	C	31788	0.498553	0.0460998	0.00753133	9.29e-10	PLIC_AD
10	rs564819152	21820650	G	A	32070	0.317306	-0.0592832	0.00807451	2.1e-13	PLIC_AD
11	rs12279786	1598279	C	G	32012	0.33753	-0.0474684	0.00797541	2.65e-09	PLIC_AD
11	rs2071020	10478228	T	C	32109	0.455776	0.0868695	0.00755333	1.31e-30	PLIC_AD
12	rs12146713	106476805	C	T	32295	0.0947515	0.0776887	0.0127554	1.12e-09	PLIC_AD
14	rs2241274	75251331	A	G	32285	0.464782	-0.0490496	0.0074976	6.07e-11	PLIC_AD
16	rs12149643	87231499	C	T	32040	0.416651	-0.0492158	0.007614	1.02e-10	PLIC_AD
18	rs11664412	74549962	G	T	32295	0.151324	-0.0644748	0.0104874	7.85e-10	PLIC_AD
19	rs2242523	36231646	T	C	31476	0.457841	0.0546752	0.00759084	5.9e-13	PLIC_AD
21	rs1474490	40716136	A	C	32090	0.454332	0.0444982	0.00752156	3.3e-09	PLIC_AD
1	rs9426742	21537562	T	C	30852	0.44989	0.043801	0.00787877	2.71e-08	PLIC_FA
1	rs2275180	43773033	A	G	32373	0.375127	0.0434996	0.00788973	3.52e-08	PLIC_FA
1	rs3789586	51054322	T	C	32425	0.150224	-0.0618593	0.0107047	7.53e-09	PLIC_FA
1	rs310219	65315298	T	C	32410	0.224051	0.0578222	0.00916576	2.82e-10	PLIC_FA
1	rs3795503	180905694	T	C	32410	0.315427	-0.045221	0.00821796	3.74e-08	PLIC_FA
1	rs6593925	205100663	G	C	32527	0.090863	0.0875189	0.0132943	4.6e-11	PLIC_FA
5	rs10052710	82860025	G	T	32488	0.19461	-0.0680222	0.00959338	1.34e-12	PLIC_FA
5	rs7719289	139706525	T	G	31931	0.227757	-0.0706588	0.00915912	1.21e-14	PLIC_FA
5	rs116578164	139767963	C	T	31109	0.183902	0.0626387	0.0100718	5e-10	PLIC_FA
7	rs798510	2783338	T	C	32460	0.296981	0.053063	0.00837392	2.35e-10	PLIC_FA
7	rs2254737	17811797	T	C	31382	0.418791	-0.0432642	0.00786099	3.72e-08	PLIC_FA
7	rs10244020	55108994	C	T	31721	0.474433	0.0569352	0.00772794	1.74e-13	PLIC_FA
9	rs679038	22029080	A	G	32549	0.423515	-0.0463222	0.00775779	2.36e-09	PLIC_FA
10	rs7098100	21834536	A	G	32556	0.337127	-0.0540849	0.00804394	1.77e-11	PLIC_FA
11	rs11042811	10473889	T	C	32556	0.459915	0.0505294	0.00766063	4.22e-11	PLIC_FA
11	rs61897795	61618169	G	A	32444	0.166102	-0.0574712	0.0102469	2.04e-08	PLIC_FA
12	rs12146713	106476805	C	T	32556	0.0948366	0.125275	0.0129795	4.83e-22	PLIC_FA
14	rs4983170	26886758	T	C	32453	0.182633	0.0549068	0.00984614	2.45e-08	PLIC_FA
14	rs61986114	53908942	T	C	32505	0.200585	-0.0557953	0.00948992	4.12e-09	PLIC_FA
15	rs208829	89947042	A	G	31885	0.385495	0.0645508	0.00790431	3.17e-16	PLIC_FA
16	rs4843227	87225139	C	T	32299	0.379021	-0.0582379	0.00788395	1.5e-13	PLIC_FA
18	rs12970504	60895919	C	T	32301	0.191372	0.0581323	0.00975807	2.56e-09	PLIC_FA
19	rs2242522	36228954	G	T	32242	0.483097	0.0594094	0.00765674	8.55e-15	PLIC_FA
21	rs9974272	42521711	G	A	32297	0.208704	0.0595067	0.00945348	3.08e-10	PLIC_FA
22	rs2267161	30953295	T	C	32556	0.308837	0.0496006	0.00827585	2.05e-09	PLIC_FA
22	rs62235125	38485064	G	C	32154	0.388972	-0.0557024	0.0078663	1.43e-12	PLIC_FA
1	rs310213	65318351	C	G	32024	0.223863	-0.059896	0.00882044	1.12e-11	PLIC_MD
5	rs13164785	82861400	G	T	31953	0.191297	0.0823346	0.00930568	8.93e-19	PLIC_MD
7	rs10225877	55150822	T	A	31981	0.18672	0.0582726	0.00948148	7.95e-10	PLIC_MD
8	rs1499646	75068112	C	T	31940	0.191766	0.0650814	0.00936499	3.67e-12	PLIC_MD
11	rs2071020	10478228	T	C	31982	0.455725	0.0522935	0.00739177	1.5e-12	PLIC_MD
11	rs4755851	44626461	G	C	31829	0.125734	0.0733298	0.0110982	3.91e-11	PLIC_MD
11	rs907638	61769588	C	T	31680	0.339031	-0.0428318	0.00779581	3.92e-08	PLIC_MD
17	rs113630349	42903044	C	G	32099	0.169351	-0.0672495	0.00980675	7.01e-12	PLIC_MD
19	rs117826338	5904353	T	C	32100	0.133178	-0.060315	0.0107461	1.99e-08	PLIC_MD
22	rs2267161	30953295	T	C	32165	0.308907	-0.0475127	0.00796116	2.4e-09	PLIC_MD
1	rs637990	21047616	A	G	31870	0.422152	-0.0486036	0.00786507	6.42e-10	PLIC_MO
1	rs12058355	43801186	G	A	32226	0.383386	0.049592	0.00793953	4.21e-10	PLIC_MO
1	rs7543272	51069102	C	T	32282	0.151152	-0.0622007	0.0107934	8.27e-09	PLIC_MO
1	rs2369633	205181062	T	C	32299	0.0908232	0.0782548	0.0134616	6.13e-09	PLIC_MO
2	rs4665790	21188570	T	A	32239	0.461692	-0.0576172	0.00773119	9.15e-14	PLIC_MO
3	rs7645553	78496559	G	C	32114	0.329856	0.0458344	0.00822923	2.55e-08	PLIC_MO
3	rs9842055	190678743	G	T	30605	0.434471	-0.0459494	0.00801223	9.76e-09	PLIC_MO
3	rs10933668	194470632	C	T	32161	0.314294	-0.0497811	0.00831598	2.15e-09	PLIC_MO
5	rs7707527	76430636	C	G	32226	0.443958	-0.0481091	0.00776056	5.68e-10	PLIC_MO
5	rs329118	133861663	T	C	32218	0.423304	-0.0436734	0.00781436	2.29e-08	PLIC_MO
5	rs7719289	139706525	T	G	31719	0.227908	-0.0775132	0.00926686	6.03e-17	PLIC_MO
7	rs11766798	55124319	A	G	32286	0.264728	0.0499732	0.00872057	1e-08	PLIC_MO
8	rs7815898	141876541	G	C	32217	0.425272	-0.0460838	0.00778393	3.21e-09	PLIC_MO
9	rs543830	22026639	T	A	32285	0.423463	-0.0486367	0.00785445	5.93e-10	PLIC_MO
10	rs7098100	21834536	A	G	32342	0.337301	-0.0665113	0.00813916	3.04e-16	PLIC_MO
11	rs12279786	1598279	C	G	32058	0.337669	-0.0488765	0.00821145	2.65e-09	PLIC_MO
11	rs7111970	10471680	A	G	32239	0.468951	0.0798957	0.00774542	6.01e-25	PLIC_MO
11	rs61897795	61618169	G	A	32231	0.166005	-0.0597744	0.0103658	8.09e-09	PLIC_MO
12	rs12146713	106476805	C	T	32342	0.094722	0.0920465	0.0131354	2.43e-12	PLIC_MO
14	rs7154256	75252587	C	T	32329	0.465805	-0.0439721	0.00771753	1.21e-08	PLIC_MO
16	rs12149643	87231499	C	T	32086	0.41663	-0.0550757	0.00783978	2.14e-12	PLIC_MO
17	rs7208469	7619871	A	G	32096	0.289616	-0.0486769	0.00853083	1.16e-08	PLIC_MO
17	rs9899357	19800549	C	T	31891	0.37995	0.0495145	0.00800336	6.14e-10	PLIC_MO
19	rs231592	36219209	G	A	32216	0.467097	0.0567521	0.00772982	2.1e-13	PLIC_MO
20	rs6050472	25219852	A	G	32050	0.468175	-0.0435825	0.00773134	1.73e-08	PLIC_MO
20	rs3787342	49183924	C	A	32235	0.356522	0.0456589	0.00809355	1.69e-08	PLIC_MO
22	rs2267161	30953295	T	C	32342	0.309041	0.0486695	0.00836906	6.05e-09	PLIC_MO
22	rs9610902	38481516	A	G	31832	0.386545	-0.049982	0.00798228	3.81e-10	PLIC_MO
1	rs310213	65318351	C	G	32183	0.223938	-0.0693632	0.00904879	1.78e-14	PLIC_RD
5	rs33603	82772504	G	T	32137	0.264633	-0.0467275	0.00855466	4.7e-08	PLIC_RD
5	rs10052710	82860025	G	T	32258	0.194711	0.0856821	0.00946358	1.38e-19	PLIC_RD
5	rs4150210	139721913	A	T	32157	0.261327	-0.0649057	0.00859392	4.27e-14	PLIC_RD
7	rs798514	2781892	C	T	32138	0.301014	-0.0454744	0.00824552	3.49e-08	PLIC_RD
7	rs2254737	17811797	T	C	31163	0.418814	0.042651	0.00775453	3.79e-08	PLIC_RD
7	rs6953397	55103199	C	T	29657	0.419951	-0.0590348	0.00794928	1.12e-13	PLIC_RD
8	rs2956042	75078802	T	A	32200	0.261366	0.0602671	0.00856953	2.03e-12	PLIC_RD
8	rs55705857	130645692	G	A	32325	0.0556845	0.0972941	0.016413	3.07e-09	PLIC_RD
9	rs1412829	22043926	G	A	32325	0.424687	0.0509849	0.00765282	2.7e-11	PLIC_RD
11	rs61897795	61618169	G	A	32214	0.165968	0.0587923	0.010112	6.1e-09	PLIC_RD
12	rs12146713	106476805	C	T	32325	0.0947409	-0.111054	0.0128127	4.42e-18	PLIC_RD
14	rs61986114	53908942	T	C	32274	0.200363	0.054099	0.00936855	7.72e-09	PLIC_RD
15	rs208829	89947042	A	G	31658	0.385416	-0.0595888	0.0078008	2.19e-14	PLIC_RD
16	rs77520347	93507	A	G	31377	0.109746	0.0767214	0.012201	3.21e-10	PLIC_RD
16	rs4843558	87225473	G	A	32289	0.378798	0.0473197	0.00775114	1.03e-09	PLIC_RD
19	rs2242522	36228954	G	T	32012	0.483022	-0.0427991	0.00755612	1.48e-08	PLIC_RD
21	rs9974272	42521711	G	A	32068	0.208385	-0.0613614	0.00933351	4.89e-11	PLIC_RD
22	rs2267161	30953295	T	C	32325	0.30894	-0.0573902	0.00816639	2.1e-12	PLIC_RD
22	rs62235125	38485064	G	C	31927	0.388824	0.0491722	0.00776522	2.41e-10	PLIC_RD
1	rs10922264	197566414	A	T	32282	0.105384	0.0673851	0.0122754	4.03e-08	PTR_AD
2	rs35485952	204212832	T	C	32322	0.0296857	-0.145896	0.0221972	4.94e-11	PTR_AD
4	rs10018478	108891986	A	T	32324	0.0802809	-0.0755275	0.0137993	4.42e-08	PTR_AD
4	rs35518350	185126114	A	G	32101	0.258497	0.0505563	0.00865512	5.18e-09	PTR_AD
5	rs3852188	82858014	G	C	32031	0.190878	0.0983459	0.00958011	1.01e-24	PTR_AD
5	rs4916814	89957090	G	T	32270	0.362984	-0.0449291	0.00783077	9.61e-09	PTR_AD
6	rs9262549	30997692	G	C	32350	0.329799	-0.047071	0.00798432	3.74e-09	PTR_AD
7	rs4725995	150819169	T	C	31463	0.307647	0.0535522	0.00830171	1.11e-10	PTR_AD
8	rs72673629	120931207	G	A	31530	0.437774	0.0509768	0.00769972	3.58e-11	PTR_AD
11	rs7130140	10489826	C	A	32053	0.376626	-0.0496627	0.00780016	1.93e-10	PTR_AD
17	rs2017257	42997149	T	A	32025	0.409352	-0.0464149	0.00769879	1.65e-09	PTR_AD
17	rs2027995	43161353	C	T	32292	0.332002	-0.0648585	0.00803726	7.05e-16	PTR_AD
22	rs2267161	30953295	T	C	32350	0.309011	-0.0517891	0.00817402	2.36e-10	PTR_AD
1	rs28482847	46595077	A	T	32340	0.319388	0.0444873	0.00808435	3.74e-08	PTR_FA
1	rs61788401	59317534	A	T	32503	0.108005	0.0892275	0.0121525	2.1e-13	PTR_FA
4	rs3959520	54196106	A	G	30091	0.363215	0.0467747	0.00812767	8.66e-09	PTR_FA
5	rs485142	78265876	G	A	31867	0.437835	0.0423324	0.00766669	3.36e-08	PTR_FA
5	rs33599	82774904	A	G	32487	0.261289	0.0669744	0.00858541	6.14e-15	PTR_FA
5	rs67827860	82860485	T	C	32425	0.191025	-0.125833	0.00955059	1.22e-39	PTR_FA
6	rs3129787	29048689	T	A	32315	0.286214	0.0585212	0.0083933	3.12e-12	PTR_FA
6	rs9400505	112110528	C	T	32249	0.135818	0.0631136	0.0110048	9.75e-09	PTR_FA
6	rs225748	142563242	G	C	31500	0.220365	0.051074	0.00925318	3.4e-08	PTR_FA
7	rs9801236	564083	C	T	30640	0.164719	-0.0577618	0.0104642	3.39e-08	PTR_FA
7	rs6461389	18907030	T	C	32405	0.344978	0.0456876	0.00792502	8.17e-09	PTR_FA
8	rs55705857	130645692	G	A	32556	0.0556579	-0.108183	0.01643	4.56e-11	PTR_FA
10	rs4838429	49841549	T	C	32287	0.486899	-0.0422719	0.0075774	2.42e-08	PTR_FA
11	rs79289577	68030633	C	T	31928	0.0570502	0.0931382	0.0163804	1.3e-08	PTR_FA
12	rs12299431	118440702	T	C	32477	0.379499	-0.0466647	0.00777859	1.98e-09	PTR_FA
16	rs2446084	81428803	C	T	32556	0.325577	0.0455638	0.00806411	1.6e-08	PTR_FA
17	rs113882147	42901884	C	T	32496	0.157558	0.0722956	0.0103708	3.15e-12	PTR_FA
18	rs9966170	35029506	A	G	32556	0.363666	-0.0520049	0.00785834	3.65e-11	PTR_FA
19	rs79569934	5900471	T	C	32556	0.133785	0.0634133	0.0109392	6.76e-09	PTR_FA
22	rs112031212	30662813	T	C	32403	0.0174984	0.17532	0.0288121	1.17e-09	PTR_FA
22	rs2267161	30953295	T	C	32556	0.30896	0.0530216	0.00817212	8.69e-11	PTR_FA
22	rs742396	38452254	C	G	32520	0.375138	-0.053554	0.00776529	5.33e-12	PTR_FA
3	rs3755651	183366595	A	G	32323	0.160861	-0.062678	0.0102222	8.7e-10	PTR_MD
4	rs4254834	54095119	C	G	32281	0.365912	-0.0465173	0.00777562	2.2e-09	PTR_MD
5	rs33599	82774904	A	G	32264	0.261375	-0.0720997	0.00856603	3.86e-17	PTR_MD
5	rs10052710	82860025	G	T	32265	0.194778	0.146485	0.00945284	3.67e-54	PTR_MD
5	rs4150221	139719991	C	T	32274	0.265864	-0.0557984	0.00851736	5.71e-11	PTR_MD
6	rs3130724	29118530	A	C	32332	0.226989	-0.0716486	0.00897021	1.38e-15	PTR_MD
6	rs7751220	112119059	G	A	32082	0.137538	-0.0653339	0.0109103	2.12e-09	PTR_MD
6	rs12216113	142301831	G	A	32332	0.35038	-0.0435481	0.00787514	3.21e-08	PTR_MD
7	rs13225457	541830	A	G	32274	0.368671	-0.0452112	0.00777432	6.05e-09	PTR_MD
7	rs12699998	18904175	G	A	32117	0.370692	-0.048168	0.00780706	6.84e-10	PTR_MD
8	rs17198394	25226261	A	G	32162	0.0914122	0.0739019	0.0130668	1.55e-08	PTR_MD
8	rs1693551	101675584	C	T	32332	0.465251	0.0462608	0.00753666	8.35e-10	PTR_MD
8	rs55705857	130645692	G	A	32332	0.0555951	0.137075	0.0164088	6.61e-17	PTR_MD
10	rs1822861	49834326	G	T	32332	0.492639	0.0470826	0.00753568	4.16e-10	PTR_MD
10	rs911547	105639421	G	A	32185	0.135995	0.0629653	0.0110056	1.06e-08	PTR_MD
11	rs939924	257308	C	T	32021	0.0900815	-0.0814917	0.0131898	6.48e-10	PTR_MD
12	rs12299431	118440702	T	C	32255	0.379399	0.0473446	0.00776482	1.08e-09	PTR_MD
17	rs7216587	42947314	C	T	32332	0.161094	-0.0798074	0.0102532	7.04e-15	PTR_MD
17	rs9899380	43173131	C	G	31755	0.425256	-0.0510681	0.00769657	3.24e-11	PTR_MD
17	rs62086903	66016006	C	T	31569	0.226599	0.0545158	0.00906876	1.84e-09	PTR_MD
22	rs2267161	30953295	T	C	32332	0.309075	-0.0629865	0.00815691	1.15e-14	PTR_MD
22	rs742396	38452254	C	G	32296	0.375	0.0488021	0.00775509	3.12e-10	PTR_MD
2	rs12466122	71961307	T	C	32206	0.3554	0.0458218	0.00796509	8.78e-09	PTR_MO
2	rs2060827	204280652	T	A	32322	0.185895	-0.0559586	0.00976072	9.86e-09	PTR_MO
7	rs6970773	150787830	A	G	31962	0.268162	-0.0523441	0.00861023	1.21e-09	PTR_MO
8	rs979236	24615078	T	C	31990	0.465098	0.0436939	0.00762431	9.99e-09	PTR_MO
9	rs11562361	96113437	G	A	31676	0.469883	-0.0420588	0.00768845	4.49e-08	PTR_MO
1	rs61788401	59317534	A	T	32266	0.108008	-0.0785308	0.0120708	7.73e-11	PTR_RD
3	rs1456330	183400967	G	A	31644	0.25207	-0.0501567	0.00871695	8.72e-09	PTR_RD
4	rs12509702	54093969	C	T	32269	0.365784	-0.0436395	0.00774374	1.75e-08	PTR_RD
5	rs1011979	82393250	C	T	32304	0.448071	-0.0423554	0.00753883	1.93e-08	PTR_RD
5	rs33599	82774904	A	G	32251	0.261341	-0.0738056	0.00852732	4.92e-18	PTR_RD
5	rs10052710	82860025	G	T	32252	0.194732	0.143641	0.00941249	1.4e-52	PTR_RD
5	rs4150221	139719991	C	T	32263	0.26597	-0.0478806	0.00847887	1.63e-08	PTR_RD
6	rs3116836	29180314	C	A	31835	0.238857	-0.0706924	0.00883778	1.26e-15	PTR_RD
6	rs2182643	112121096	A	G	32162	0.138253	-0.0676363	0.010824	4.14e-10	PTR_RD
6	rs12216113	142301831	G	A	32319	0.350398	-0.0448407	0.00784047	1.07e-08	PTR_RD
7	rs13225457	541830	A	G	32261	0.36868	-0.0435401	0.00773943	1.85e-08	PTR_RD
7	rs6461389	18907030	T	C	32169	0.345099	-0.0508075	0.0078759	1.11e-10	PTR_RD
8	rs1693551	101675584	C	T	32319	0.465237	0.0458063	0.007504	1.03e-09	PTR_RD
8	rs55705857	130645692	G	A	32319	0.0555865	0.12614	0.0163367	1.15e-14	PTR_RD
10	rs4838429	49841549	T	C	32050	0.486833	0.0439587	0.00753098	5.31e-09	PTR_RD
10	rs371240513	105669290	G	A	32197	0.360888	-0.0434351	0.00781162	2.69e-08	PTR_RD
11	rs939924	257308	C	T	32008	0.0900556	-0.0761536	0.0131323	6.67e-09	PTR_RD
12	rs12299431	118440702	T	C	32242	0.379412	0.0496959	0.007731	1.29e-10	PTR_RD
17	rs113882147	42901884	C	T	32259	0.157382	-0.076601	0.010311	1.09e-13	PTR_RD
17	rs62086903	66016006	C	T	31557	0.22659	0.0542349	0.00902867	1.89e-09	PTR_RD
19	rs79569934	5900471	T	C	32319	0.133992	-0.061792	0.0108592	1.27e-08	PTR_RD
19	rs7256200	45415935	T	G	32123	0.124008	0.0637819	0.0113609	1.97e-08	PTR_RD
22	rs112031212	30662813	T	C	32166	0.0174874	-0.157407	0.0286384	3.88e-08	PTR_RD
22	rs2267161	30953295	T	C	32319	0.309044	-0.0576817	0.00812097	1.22e-12	PTR_RD
22	rs742396	38452254	C	G	32283	0.375105	0.0528355	0.00772105	7.75e-12	PTR_RD
3	rs1464047	39526874	C	T	31571	0.478556	-0.0493777	0.00758156	7.37e-11	RLIC_AD
5	rs12653308	82858828	G	A	32351	0.196053	0.0821132	0.00945236	3.72e-18	RLIC_AD
6	rs2535305	31054381	G	A	32226	0.403137	0.0444733	0.00769151	7.38e-09	RLIC_AD
7	rs112858587	548537	T	C	31353	0.301949	-0.0458431	0.00831656	3.54e-08	RLIC_AD
8	rs2173579	75088047	G	C	32132	0.231358	0.0592901	0.00897002	3.85e-11	RLIC_AD
11	rs2071020	10478228	T	C	32165	0.455837	0.0624206	0.00760388	2.23e-16	RLIC_AD
13	rs11838776	111040681	A	G	31175	0.276985	0.0469962	0.00857813	4.29e-08	RLIC_AD
22	rs2267161	30953295	T	C	32351	0.309017	-0.0482015	0.00818315	3.85e-09	RLIC_AD
1	rs3789586	51054322	T	C	32435	0.150193	-0.0689142	0.0108803	2.39e-10	RLIC_FA
5	rs1867667	82779013	G	A	32545	0.260946	0.0658976	0.00883038	8.48e-14	RLIC_FA
5	rs10052710	82860025	G	T	32498	0.194658	-0.10373	0.00974914	1.94e-26	RLIC_FA
7	rs798498	2795882	G	T	32541	0.310301	0.0482176	0.00839536	9.28e-09	RLIC_FA
8	rs55705857	130645692	G	A	32566	0.0556562	-0.134573	0.0169056	1.72e-15	RLIC_FA
12	rs77216612	12877983	G	A	32477	0.284016	-0.0506308	0.00857236	3.5e-09	RLIC_FA
12	rs12146713	106476805	C	T	32566	0.0948382	0.10169	0.0131915	1.27e-14	RLIC_FA
16	rs4843550	87236383	G	C	32167	0.430783	-0.0538298	0.00784064	6.63e-12	RLIC_FA
17	rs12450956	28529025	G	A	32470	0.446535	-0.0574725	0.00781021	1.86e-13	RLIC_FA
17	rs370961818	42986286	A	G	32277	0.163522	0.0776051	0.0105512	1.91e-13	RLIC_FA
22	rs6006427	30669993	C	T	32566	0.238485	-0.0502033	0.00906259	3.03e-08	RLIC_FA
4	rs6826663	54217607	C	T	32070	0.141098	-0.0661503	0.0109822	1.71e-09	RLIC_MD
4	rs13112508	65580847	C	T	32124	0.375187	0.044229	0.00784531	1.72e-08	RLIC_MD
5	rs28360285	82590547	T	C	30524	0.471481	-0.0463732	0.00788402	4.06e-09	RLIC_MD
5	rs33599	82774904	A	G	32272	0.261357	-0.0723221	0.00868389	8.2e-17	RLIC_MD
5	rs10052710	82860025	G	T	32273	0.194807	0.138361	0.0095849	3.1e-47	RLIC_MD
5	rs4150197	139726292	T	C	32013	0.259113	-0.0532211	0.00875541	1.21e-09	RLIC_MD
6	rs806977	26189615	G	A	32340	0.468383	0.0515538	0.00764975	1.59e-11	RLIC_MD
6	rs3129171	29155749	A	G	32340	0.24329	-0.0545397	0.00887402	7.95e-10	RLIC_MD
6	rs1887315	112151444	G	C	31959	0.128133	-0.0649212	0.0114352	1.37e-08	RLIC_MD
7	rs9692176	548066	G	T	30539	0.405662	-0.0591371	0.0079983	1.43e-13	RLIC_MD
7	rs151057105	54944920	T	C	32067	0.0917922	0.0730639	0.0132469	3.48e-08	RLIC_MD
8	rs2956042	75078802	T	A	32215	0.261431	0.0606826	0.00867986	2.73e-12	RLIC_MD
8	rs55705857	130645692	G	A	32340	0.0556277	0.120729	0.016634	3.93e-13	RLIC_MD
10	rs3781345	105412730	T	G	32288	0.456005	-0.0424691	0.00768783	3.31e-08	RLIC_MD
10	rs371240513	105669290	G	A	32218	0.360916	-0.0551743	0.0079561	4.07e-12	RLIC_MD
11	rs10840420	10490415	C	T	31997	0.445729	0.0424075	0.00772019	3.95e-08	RLIC_MD
11	rs7935166	44636547	A	G	32340	0.132498	0.0714244	0.0112158	1.91e-10	RLIC_MD
11	rs60491498	82433770	A	C	32176	0.111154	-0.0663258	0.0121402	4.67e-08	RLIC_MD
13	rs11838776	111040681	A	G	31164	0.277002	0.0546017	0.0086711	3.04e-10	RLIC_MD
17	rs113882147	42901884	C	T	32280	0.157342	-0.0880126	0.0105029	5.3e-17	RLIC_MD
22	rs2267161	30953295	T	C	32340	0.309045	-0.0653425	0.00827049	2.77e-15	RLIC_MD
22	rs760975	38467784	G	C	32071	0.380765	0.0435402	0.00787504	3.22e-08	RLIC_MD
1	rs2767512	56158236	A	G	32326	0.212956	-0.0591498	0.00948961	4.57e-10	RLIC_MO
1	rs3795503	180905694	T	C	32204	0.315427	-0.0468911	0.00840074	2.38e-08	RLIC_MO
3	rs9842055	190678743	G	T	30611	0.434435	-0.0485292	0.00809592	2.04e-09	RLIC_MO
7	rs1182197	2863289	C	A	32110	0.381859	0.0660251	0.00805287	2.42e-16	RLIC_MO
7	rs6944563	134389713	T	C	32236	0.351052	-0.0524202	0.00820991	1.71e-10	RLIC_MO
9	rs72748148	113677241	A	G	32231	0.212714	-0.0538745	0.00952439	1.55e-08	RLIC_MO
10	rs564819152	21820650	G	A	32123	0.317343	-0.0468988	0.0084006	2.37e-08	RLIC_MO
10	rs7922624	25040152	A	C	32342	0.349932	-0.0521941	0.00818209	1.78e-10	RLIC_MO
10	rs2761294	95067043	A	G	29944	0.394052	-0.0483672	0.00830031	5.64e-09	RLIC_MO
11	rs321348	110945939	G	A	32156	0.313192	0.0631008	0.00842626	6.96e-14	RLIC_MO
12	rs34022980	21462752	A	G	32250	0.131488	-0.0702988	0.0115532	1.17e-09	RLIC_MO
12	rs12146713	106476805	C	T	32349	0.0947479	0.133464	0.0132711	8.58e-24	RLIC_MO
15	rs2074585	91009484	G	A	32349	0.490943	0.042534	0.00779257	4.81e-08	RLIC_MO
16	rs11640181	87258088	A	G	32032	0.378543	-0.052584	0.00804476	6.3e-11	RLIC_MO
20	rs693974	10557252	C	T	32051	0.394683	0.0482751	0.00799746	1.58e-09	RLIC_MO
22	rs4820303	38134166	A	G	32263	0.288798	0.0505939	0.00861182	4.23e-09	RLIC_MO
1	rs58432198	51256091	T	C	32039	0.113502	0.0689492	0.0123084	2.12e-08	RLIC_RD
1	rs2780902	65329100	T	C	32181	0.22375	-0.0510994	0.00929363	3.83e-08	RLIC_RD
4	rs62323568	54349594	C	T	32205	0.152042	-0.0626651	0.010776	6.05e-09	RLIC_RD
5	rs1479569	82377566	T	C	32041	0.433101	-0.0448097	0.00786253	1.2e-08	RLIC_RD
5	rs33599	82774904	A	G	32273	0.261333	-0.0776749	0.0088028	1.11e-18	RLIC_RD
5	rs10052710	82860025	G	T	32274	0.19477	0.134269	0.00971564	1.94e-43	RLIC_RD
5	rs4150197	139726292	T	C	32014	0.259137	-0.0540968	0.00887464	1.09e-09	RLIC_RD
6	rs2517621	30155767	T	C	32340	0.167053	-0.0666252	0.0103676	1.31e-10	RLIC_RD
7	rs9692176	548066	G	T	30541	0.405619	-0.0550353	0.00810785	1.14e-11	RLIC_RD
8	rs1499648	75078545	C	A	32216	0.261469	0.0488709	0.00879737	2.77e-08	RLIC_RD
8	rs55705857	130645692	G	A	32341	0.0556414	0.140534	0.0168587	7.69e-17	RLIC_RD
10	rs10857614	49829983	C	T	32341	0.484725	-0.0423941	0.0077472	4.45e-08	RLIC_RD
10	rs61871257	105324242	C	T	32107	0.215358	-0.0515123	0.00944262	4.89e-08	RLIC_RD
10	rs11191822	105599770	G	T	32341	0.362636	-0.0529348	0.00803345	4.42e-11	RLIC_RD
11	rs7935166	44636547	A	G	32341	0.132463	0.0625198	0.0113693	3.82e-08	RLIC_RD
12	rs11055034	12890626	A	C	32096	0.278056	0.0497232	0.00864221	8.74e-09	RLIC_RD
12	rs12146713	106476805	C	T	32341	0.094694	-0.0863141	0.0131588	5.4e-11	RLIC_RD
12	rs34421054	118437058	T	C	30610	0.277442	0.048926	0.00888425	3.65e-08	RLIC_RD
17	rs12450956	28529025	G	A	32245	0.446581	0.0524299	0.00778673	1.66e-11	RLIC_RD
17	rs113882147	42901884	C	T	32281	0.157353	-0.0895742	0.0106457	3.96e-17	RLIC_RD
22	rs2267161	30953295	T	C	32341	0.309035	-0.058348	0.00838306	3.4e-12	RLIC_RD
22	rs760975	38467784	G	C	32072	0.380784	0.0441764	0.00798194	3.12e-08	RLIC_RD
1	rs12134838	21414919	A	T	30791	0.464145	0.0418811	0.00743626	1.78e-08	SCC_AD
1	rs7523799	179322078	T	C	32345	0.0771371	0.0989109	0.0135357	2.72e-13	SCC_AD
2	rs4267497	64304680	C	T	31501	0.477302	-0.0424729	0.00735433	7.69e-09	SCC_AD
2	rs17750683	187620297	T	A	32281	0.306558	-0.0463362	0.00787793	4.06e-09	SCC_AD
3	rs540511762	190669810	G	C	31702	0.381837	-0.0418157	0.00753428	2.86e-08	SCC_AD
5	rs924455	15747866	T	C	32217	0.457616	0.0549418	0.00728575	4.66e-14	SCC_AD
5	rs309587	82856519	C	T	31544	0.313514	0.053374	0.00783451	9.58e-12	SCC_AD
6	rs76967117	34603691	A	G	32331	0.113869	-0.0695051	0.0113477	9.07e-10	SCC_AD
10	rs12355217	14671520	T	A	31247	0.330848	-0.0488749	0.00780523	3.81e-10	SCC_AD
11	rs2071020	10478228	T	C	32164	0.455851	0.0708204	0.00729816	2.9e-22	SCC_AD
13	rs12869774	99100157	A	G	32070	0.0574524	0.0994376	0.0156298	1.99e-10	SCC_AD
18	rs470933	74695581	T	C	32210	0.153462	-0.0625779	0.0100644	5.04e-10	SCC_AD
1	rs77303590	48865121	T	C	32540	0.0266749	0.134305	0.0243549	3.5e-08	SCC_FA
4	rs6848127	85858329	T	C	32309	0.415132	-0.0445413	0.00793513	1.99e-08	SCC_FA
5	rs11746859	82770558	G	A	32312	0.461454	-0.0510498	0.00791125	1.1e-10	SCC_FA
5	rs67827860	82860485	T	C	32409	0.190965	-0.122619	0.00992901	4.9e-35	SCC_FA
5	rs3776089	139727260	G	A	32228	0.261605	0.111462	0.00896408	1.7e-35	SCC_FA
6	rs9468220	27732976	T	C	32540	0.247311	0.0644509	0.00906529	1.16e-12	SCC_FA
7	rs113510314	544984	C	T	32540	0.304902	0.0612675	0.00847647	4.9e-13	SCC_FA
7	rs77126132	54966738	A	G	32237	0.0911375	-0.143829	0.0136497	5.82e-26	SCC_FA
8	rs10955942	120939911	T	C	32422	0.220637	-0.0533048	0.00949018	1.94e-08	SCC_FA
8	rs55705857	130645692	G	A	32540	0.0556546	-0.115368	0.0170797	1.43e-11	SCC_FA
9	rs10120688	22056499	A	G	32272	0.485266	0.0668417	0.00791075	2.93e-17	SCC_FA
12	rs12146713	106476805	C	T	32540	0.0948525	0.106694	0.0133286	1.2e-15	SCC_FA
17	rs4130668	7739664	T	C	32355	0.220553	0.0527292	0.00947528	2.62e-08	SCC_FA
17	rs7218684	41449391	G	A	32144	0.163545	0.0636975	0.0106008	1.87e-09	SCC_FA
17	rs35271426	42901270	A	G	32388	0.362356	-0.0533952	0.00812877	5.08e-11	SCC_FA
22	rs2267161	30953295	T	C	32540	0.308897	0.0779049	0.00849583	4.74e-20	SCC_FA
22	rs2018980	38450620	A	G	32382	0.370437	-0.0676241	0.00810808	7.41e-17	SCC_FA
1	rs10800755	201023980	G	C	32015	0.351476	-0.0445239	0.00781864	1.24e-08	SCC_MD
3	rs6442409	13835087	T	C	31388	0.342488	-0.045462	0.00791198	9.14e-09	SCC_MD
4	rs4280723	15575718	C	G	32213	0.282495	0.0532954	0.00826192	1.11e-10	SCC_MD
4	rs1877034	185148189	G	A	31941	0.453821	0.0416203	0.00748234	2.66e-08	SCC_MD
5	rs11746859	82770558	G	A	32043	0.46113	0.0559974	0.00748664	7.45e-14	SCC_MD
5	rs17205972	82859065	T	G	32224	0.193241	0.127674	0.00934378	1.66e-42	SCC_MD
5	rs4150221	139719991	C	T	32211	0.26595	-0.0607931	0.00839595	4.46e-13	SCC_MD
6	rs9270546	32559917	T	C	31139	0.28437	0.0476364	0.00833138	1.08e-08	SCC_MD
7	rs13225457	541830	A	G	32211	0.368709	-0.0469133	0.00766525	9.34e-10	SCC_MD
7	rs77126132	54966738	A	G	31969	0.0910413	0.120257	0.0129297	1.39e-20	SCC_MD
8	rs1499648	75078545	C	A	32145	0.261487	0.0520772	0.00843654	6.71e-10	SCC_MD
8	rs12545854	120917902	G	C	32185	0.431987	0.0454649	0.00750539	1.38e-09	SCC_MD
9	rs10120688	22056499	A	G	32003	0.485048	-0.0515242	0.00748734	5.92e-12	SCC_MD
9	rs201911236	111749466	A	G	31143	0.0417108	-0.104821	0.0188988	2.92e-08	SCC_MD
11	rs71476871	10481601	C	T	31609	0.204546	0.0631237	0.00931981	1.26e-11	SCC_MD
19	rs117826338	5904353	T	C	32204	0.133306	-0.0629069	0.0108566	6.86e-09	SCC_MD
22	rs2267161	30953295	T	C	32269	0.309089	-0.0526504	0.00804094	5.84e-11	SCC_MD
2	rs7605601	37147975	G	T	32203	0.456169	-0.0445992	0.00709815	3.32e-10	SCC_MO
2	rs12621910	186926019	C	T	32170	0.15645	-0.0529715	0.00971516	4.97e-08	SCC_MO
3	rs560857329	190669811	A	C	31699	0.381794	-0.0559479	0.00733185	2.33e-14	SCC_MO
5	rs7704277	15713072	T	C	31624	0.410211	0.0451964	0.00722218	3.9e-10	SCC_MO
6	rs76967117	34603691	A	G	32328	0.113895	-0.0614473	0.0110414	2.62e-08	SCC_MO
7	rs798510	2783338	T	C	32251	0.296983	0.0443556	0.0077358	9.82e-09	SCC_MO
10	rs10218905	118757139	G	A	31485	0.248579	0.0508827	0.00825472	7.09e-10	SCC_MO
12	rs12146713	106476805	C	T	32347	0.0947383	0.114085	0.0119948	1.88e-21	SCC_MO
16	rs4786481	4353432	T	C	31244	0.241118	0.0461903	0.00839041	3.69e-08	SCC_MO
20	rs6065197	35322008	A	C	32347	0.0331406	-0.111787	0.0196143	1.2e-08	SCC_MO
4	rs78739477	15705268	T	C	31724	0.327906	0.0457943	0.00838889	4.79e-08	SCC_RD
4	rs6554068	54032319	G	A	32207	0.374918	-0.0460284	0.00799788	8.66e-09	SCC_RD
4	rs185307128	185132354	C	T	31694	0.382896	-0.0446002	0.00803089	2.8e-08	SCC_RD
5	rs11746859	82770558	G	A	32030	0.461099	0.0608829	0.00785062	8.82e-15	SCC_RD
5	rs67827860	82860485	T	C	32126	0.191014	0.142499	0.00985306	2.09e-47	SCC_RD
5	rs3776089	139727260	G	A	31946	0.261535	-0.0995971	0.00889531	4.24e-29	SCC_RD
6	rs3117426	29272012	T	C	32256	0.224284	-0.063505	0.00931103	9.08e-12	SCC_RD
6	rs9269339	32540331	G	A	31355	0.271966	0.0485351	0.00881241	3.64e-08	SCC_RD
7	rs112576539	546952	A	C	31429	0.299691	-0.0630689	0.00856841	1.83e-13	SCC_RD
7	rs77126132	54966738	A	G	31956	0.0909688	0.14746	0.0135623	1.55e-27	SCC_RD
8	rs1499648	75078545	C	A	32132	0.261422	0.0501165	0.00884632	1.47e-08	SCC_RD
8	rs4871013	120907990	C	T	32129	0.43123	0.0548867	0.0078758	3.19e-12	SCC_RD
8	rs143893586	130617692	G	T	31939	0.0576568	0.0952916	0.0166874	1.13e-08	SCC_RD
9	rs10120688	22056499	A	G	31990	0.485214	-0.0646866	0.00785164	1.74e-16	SCC_RD
10	rs911547	105639421	G	A	32109	0.135943	0.0632558	0.0113784	2.71e-08	SCC_RD
17	rs28485918	42993372	T	A	30225	0.311084	-0.0577352	0.00867353	2.8e-11	SCC_RD
17	rs369268849	44708736	T	A	29410	0.208994	0.0601089	0.0100149	1.95e-09	SCC_RD
22	rs2267161	30953295	T	C	32256	0.309136	-0.0734612	0.00843226	2.99e-18	SCC_RD
22	rs2018980	38450620	A	G	32098	0.370117	0.0597288	0.00805128	1.18e-13	SCC_RD
1	rs2483059	206626779	A	G	32106	0.205772	-0.052706	0.00883887	2.48e-09	SCR_AD
2	rs59216835	19180552	C	A	31534	0.144146	0.0711231	0.0102343	3.67e-12	SCR_AD
3	rs78702244	132300248	C	A	32246	0.0860262	0.0786394	0.0127045	6.02e-10	SCR_AD
5	rs76738717	82891305	G	A	32060	0.133952	0.0831525	0.0105025	2.43e-15	SCR_AD
6	rs1265888	32066447	A	G	32268	0.175282	-0.0603961	0.0093852	1.23e-10	SCR_AD
7	rs1636256	2893440	T	C	31732	0.30318	0.0626935	0.00784551	1.34e-15	SCR_AD
9	rs72748146	113677069	G	A	32156	0.213926	-0.0535297	0.00870588	7.81e-10	SCR_AD
10	rs12251016	21821918	T	A	32173	0.341109	-0.0514764	0.00753236	8.26e-12	SCR_AD
10	rs77192138	60245124	A	G	32054	0.0995976	0.0662099	0.0120217	3.64e-08	SCR_AD
11	rs10840420	10490415	C	T	31939	0.44574	0.042718	0.00723365	3.52e-09	SCR_AD
12	rs12146713	106476805	C	T	32282	0.0947432	0.0874233	0.0121605	6.52e-13	SCR_AD
16	rs7197237	49673381	A	G	32034	0.208466	0.0484129	0.00883712	4.29e-08	SCR_AD
16	rs9308343	87224857	G	A	32012	0.424497	-0.0654307	0.00723637	1.54e-19	SCR_AD
17	rs112665297	44348634	C	T	29257	0.177257	0.0567908	0.00980752	7.02e-09	SCR_AD
18	rs9952041	40207370	G	A	32166	0.283964	0.0450739	0.00793592	1.35e-08	SCR_AD
22	rs4821706	38154690	G	A	31813	0.285591	0.0437683	0.00796431	3.89e-08	SCR_AD
1	rs10888693	51012279	G	T	32451	0.150781	-0.0690615	0.0109046	2.4e-10	SCR_FA
1	rs3795503	180905694	T	C	32414	0.315388	-0.0590421	0.00838468	1.9e-12	SCR_FA
1	rs10922299	197812165	T	C	32101	0.285303	0.0487098	0.00869617	2.13e-08	SCR_FA
3	rs17279437	45814094	A	G	32560	0.106772	0.0704792	0.0126093	2.28e-08	SCR_FA
5	rs410438	38817255	A	C	32560	0.291493	0.0473112	0.00854261	3.05e-08	SCR_FA
5	rs1867667	82779013	G	A	32539	0.260964	0.0504235	0.00886382	1.28e-08	SCR_FA
5	rs7733216	82857870	C	T	32051	0.198387	-0.0738504	0.00980221	4.92e-14	SCR_FA
7	rs368699386	2803883	C	T	30291	0.263346	0.0707097	0.0092009	1.53e-14	SCR_FA
9	rs4556147	113651161	T	A	32394	0.219099	-0.0625126	0.00941888	3.2e-11	SCR_FA
10	rs1416901	21820453	A	G	32194	0.33427	-0.0530457	0.00827013	1.42e-10	SCR_FA
11	rs321348	110945939	G	A	32366	0.313168	0.0509016	0.00841059	1.43e-09	SCR_FA
12	rs12146713	106476805	C	T	32560	0.0948249	0.155213	0.0132424	9.96e-32	SCR_FA
12	rs34421054	118437058	T	C	30820	0.277547	-0.0510993	0.00894394	1.11e-08	SCR_FA
15	rs2342118	85693016	G	A	32165	0.32097	-0.0471143	0.00839665	2.01e-08	SCR_FA
16	rs9308341	87224642	G	A	32292	0.379103	-0.0797732	0.00804536	3.57e-23	SCR_FA
22	rs448184	18293967	T	A	32037	0.366155	-0.0444258	0.0081367	4.76e-08	SCR_FA
3	rs554632245	183374693	A	G	30293	0.225679	-0.0522587	0.00878016	2.65e-09	SCR_MD
4	rs7699124	54212467	G	C	31691	0.347338	-0.052279	0.00751161	3.41e-12	SCR_MD
5	rs1549192	64965900	C	T	32219	0.25412	-0.0460552	0.00818241	1.82e-08	SCR_MD
5	rs33599	82774904	A	G	32203	0.261373	-0.0653787	0.0080959	6.72e-16	SCR_MD
5	rs7733216	82857870	C	T	31768	0.198423	0.111471	0.00895184	1.36e-35	SCR_MD
6	rs3129119	29102861	G	A	32244	0.281928	-0.0638487	0.00791057	6.95e-16	SCR_MD
7	rs111219357	518187	C	A	29644	0.405057	-0.0471278	0.00753606	4.01e-10	SCR_MD
8	rs16895163	122356886	T	C	31558	0.260188	0.0461871	0.00823609	2.05e-08	SCR_MD
8	rs55705857	130645692	G	A	32271	0.0555917	0.0963112	0.0155117	5.33e-10	SCR_MD
9	rs374571372	86563261	C	T	30428	0.238958	0.0475833	0.00857629	2.89e-08	SCR_MD
10	rs3910909	49844458	T	C	31911	0.486447	0.0462766	0.00716215	1.04e-10	SCR_MD
10	rs2863994	105454043	G	T	31726	0.48714	-0.0541918	0.00716814	4.03e-14	SCR_MD
10	rs371240513	105669290	G	A	32150	0.361011	-0.0517838	0.00741645	2.9e-12	SCR_MD
11	rs10840420	10490415	C	T	31927	0.445689	0.0453516	0.00719764	2.96e-10	SCR_MD
11	rs2303865	44636833	A	G	32227	0.131815	0.0613014	0.01049	5.1e-09	SCR_MD
12	rs4768849	50921495	G	A	32271	0.0217223	-0.14041	0.0243803	8.45e-09	SCR_MD
13	rs11838776	111040681	A	G	31097	0.276972	0.0531467	0.00808302	4.86e-11	SCR_MD
17	rs113882147	42901884	C	T	32211	0.157384	-0.0746665	0.00978975	2.4e-14	SCR_MD
17	rs55938136	43798360	G	A	32263	0.221988	0.0564589	0.00853238	3.67e-11	SCR_MD
17	rs9899833	43992943	A	G	31964	0.326836	0.0434723	0.00759826	1.06e-08	SCR_MD
20	rs430114	45186397	T	C	32177	0.163502	-0.0540496	0.00960858	1.85e-08	SCR_MD
22	rs59731356	30764664	C	T	32212	0.32477	-0.0518818	0.00762844	1.04e-11	SCR_MD
22	rs34399834	32036692	A	G	32242	0.0400409	0.100908	0.018087	2.42e-08	SCR_MD
1	rs7543272	51069102	C	T	32292	0.151137	-0.0630714	0.0103485	1.1e-09	SCR_MO
3	rs17279437	45814094	A	G	32352	0.106748	0.0687429	0.0119853	9.72e-09	SCR_MO
7	rs368699386	2803883	C	T	30096	0.263307	0.0670283	0.00874613	1.81e-14	SCR_MO
7	rs2411056	102491938	C	T	32259	0.171363	0.0567287	0.00981724	7.54e-09	SCR_MO
8	rs1654728	108394663	G	A	32330	0.417275	-0.0454389	0.00754691	1.73e-09	SCR_MO
9	rs10980628	113671403	C	T	32316	0.211892	-0.0645597	0.00903823	9.13e-13	SCR_MO
10	rs12783517	21878407	T	C	32230	0.299907	-0.0660952	0.00807992	2.83e-16	SCR_MO
10	rs7083142	118733562	G	C	31665	0.251761	0.0486169	0.00861195	1.65e-08	SCR_MO
11	rs1792337	92431686	C	T	31976	0.31594	0.0517526	0.00801353	1.06e-10	SCR_MO
12	rs12146713	106476805	C	T	32352	0.0947391	0.116465	0.0125929	2.28e-20	SCR_MO
16	rs4843555	87231160	T	C	32090	0.415862	-0.0852619	0.00751857	8.3e-30	SCR_MO
18	rs9955013	40241468	A	G	32170	0.25931	0.0760233	0.00845345	2.4e-19	SCR_MO
20	rs143383	34025983	G	A	32352	0.361755	-0.0443145	0.00766279	7.33e-09	SCR_MO
22	rs853295	21054588	C	T	32158	0.445721	-0.0412046	0.00746658	3.42e-08	SCR_MO
1	rs1609829	180909061	T	C	31425	0.293954	0.0460164	0.00835575	3.65e-08	SCR_RD
2	rs74675536	203673073	A	G	31869	0.126392	-0.0659459	0.0113673	6.58e-09	SCR_RD
3	rs9990122	13797136	A	T	32276	0.417942	-0.0419176	0.00764867	4.24e-08	SCR_RD
3	rs9647379	171785168	C	G	31967	0.408906	0.0456748	0.00770702	3.1e-09	SCR_RD
4	rs4254834	54095119	C	G	32246	0.36589	-0.0453458	0.00776544	5.24e-09	SCR_RD
5	rs33599	82774904	A	G	32229	0.261348	-0.0716297	0.00855446	5.6e-17	SCR_RD
5	rs7733216	82857870	C	T	31794	0.198418	0.114106	0.00945758	1.62e-33	SCR_RD
6	rs3129119	29102861	G	A	32270	0.282027	-0.057197	0.00835648	7.67e-12	SCR_RD
7	rs28606389	517798	T	C	32297	0.488869	0.0432983	0.00752088	8.56e-09	SCR_RD
7	rs7803805	17990081	G	A	31187	0.484064	-0.0439663	0.0076008	7.28e-09	SCR_RD
8	rs1401389	8174921	C	G	32209	0.459064	0.0452218	0.00754999	2.1e-09	SCR_RD
8	rs55705857	130645692	G	A	32297	0.0556244	0.101761	0.0163845	5.27e-10	SCR_RD
10	rs10857614	49829983	C	T	32297	0.484735	-0.0516503	0.00752862	6.86e-12	SCR_RD
10	rs61000833	105447838	C	T	31906	0.410957	-0.049861	0.00769218	9.05e-11	SCR_RD
10	rs11191840	105634896	T	A	32144	0.361778	-0.0538117	0.00782993	6.31e-12	SCR_RD
11	rs7935166	44636547	A	G	32297	0.132505	0.0648097	0.0110464	4.44e-09	SCR_RD
12	rs4768849	50921495	G	A	32297	0.0217203	-0.151722	0.025759	3.86e-09	SCR_RD
12	rs12146713	106476805	C	T	32297	0.0947147	-0.106175	0.0127879	1.02e-16	SCR_RD
12	rs34421054	118437058	T	C	30570	0.277592	0.0478318	0.00863297	3.01e-08	SCR_RD
16	rs4843231	87264534	G	A	31551	0.32541	0.0472438	0.00808885	5.2e-09	SCR_RD
17	rs137912621	42903795	A	G	32228	0.15727	-0.0711609	0.0103501	6.18e-12	SCR_RD
17	rs55938136	43798360	G	A	32289	0.221995	0.050331	0.00901463	2.36e-08	SCR_RD
20	rs202393	45195738	T	C	32153	0.163282	-0.0651428	0.0101602	1.44e-10	SCR_RD
22	rs6006426	30669883	G	A	32297	0.464068	0.047473	0.00754218	3.09e-10	SCR_RD
1	rs1329128	234736928	A	C	31621	0.210367	-0.0510726	0.00905795	1.72e-08	SFO_AD
5	rs1908407	116634021	G	A	32150	0.287512	-0.0618381	0.00810498	2.35e-14	SFO_AD
10	rs2817696	98869642	A	G	32217	0.314756	0.043596	0.00783402	2.62e-08	SFO_AD
10	rs1570221	105656874	A	G	32076	0.359209	-0.052753	0.00762396	4.54e-12	SFO_AD
11	rs2071020	10478228	T	C	32105	0.45591	0.0507262	0.00735809	5.43e-12	SFO_AD
11	rs4755851	44626461	G	C	31958	0.125728	0.0670453	0.0110535	1.32e-09	SFO_AD
13	rs11838776	111040681	A	G	31116	0.276931	0.0496671	0.00830126	2.19e-09	SFO_AD
14	rs10148294	31361742	T	A	31265	0.450392	0.0494187	0.00744031	3.09e-11	SFO_AD
17	rs2668639	44324539	T	C	31934	0.224807	0.0543176	0.00876678	5.8e-10	SFO_AD
1	rs12408758	156608394	C	A	29854	0.299106	0.0548868	0.00879171	4.29e-10	SFO_FA
2	rs186399184	203728984	T	C	31949	0.117155	0.0819897	0.0120223	9.12e-12	SFO_FA
2	rs13427331	220052089	A	G	32567	0.373261	-0.0443672	0.00791772	2.1e-08	SFO_FA
5	rs7733216	82857870	C	T	32058	0.198422	-0.0609958	0.00964363	2.53e-10	SFO_FA
5	rs10478336	116546192	G	A	31526	0.269476	-0.0815173	0.0088203	2.42e-20	SFO_FA
9	rs118077804	92081540	G	T	32526	0.155184	0.0601331	0.0105739	1.29e-08	SFO_FA
10	rs57694670	105447782	G	A	32050	0.406817	0.0474136	0.00786484	1.65e-09	SFO_FA
12	rs10746127	109030729	C	T	30167	0.389797	0.0447617	0.00815796	4.09e-08	SFO_FA
19	rs118087542	19712797	T	C	32539	0.0385845	-0.140257	0.0199316	1.97e-12	SFO_FA
19	rs807485	36265508	G	A	32396	0.435563	-0.0421612	0.00771976	4.72e-08	SFO_FA
19	rs11669745	47508690	G	T	32021	0.333281	0.046054	0.00818733	1.85e-08	SFO_FA
1	rs310241	65303338	G	A	31963	0.22185	-0.0534638	0.00868674	7.52e-10	SFO_MD
1	rs12068025	234738875	A	G	31492	0.449368	-0.0403236	0.00732319	3.66e-08	SFO_MD
2	rs76122535	203664929	G	C	31804	0.132798	-0.0700074	0.0106304	4.53e-11	SFO_MD
2	rs6761645	232055153	A	T	32074	0.210716	0.0517362	0.00884371	4.91e-09	SFO_MD
5	rs33599	82774904	A	G	32093	0.261256	-0.046658	0.00818634	1.2e-08	SFO_MD
5	rs13164785	82861400	G	T	31949	0.191195	0.075181	0.00912001	1.67e-16	SFO_MD
5	rs11241629	121522447	C	T	32161	0.180654	-0.0519114	0.00931811	2.53e-08	SFO_MD
6	rs275350	151016058	C	G	32019	0.412099	0.0406926	0.00730496	2.54e-08	SFO_MD
10	rs1325994	18657521	G	A	31979	0.472122	-0.0435681	0.00719518	1.4e-09	SFO_MD
10	rs2863994	105454043	G	T	31618	0.487381	-0.0583493	0.00724684	8.17e-16	SFO_MD
10	rs371240513	105669290	G	A	32039	0.361076	-0.0628255	0.00749505	5.19e-17	SFO_MD
11	rs10840422	10491741	T	A	31815	0.445875	0.0441066	0.0072742	1.33e-09	SFO_MD
11	rs7935166	44636547	A	G	32161	0.132505	0.0762191	0.0105724	5.63e-13	SFO_MD
12	rs7314654	20755963	G	A	32071	0.174581	-0.054298	0.00946356	9.6e-09	SFO_MD
13	rs11838776	111040681	A	G	30988	0.276688	0.0641192	0.0081739	4.35e-15	SFO_MD
17	rs62062798	44027383	G	A	31974	0.219069	0.0643893	0.00869556	1.31e-13	SFO_MD
22	rs242069	33241769	C	T	31667	0.240882	0.0485629	0.00847706	1.01e-08	SFO_MD
4	rs72719196	144103515	T	C	32267	0.0709858	-0.0892599	0.0148594	1.89e-09	SFO_MO
5	rs6595019	116551108	T	A	31513	0.267191	-0.0555569	0.00882215	3.03e-10	SFO_MO
7	rs62465286	132610497	A	G	32294	0.246083	-0.0504538	0.00887746	1.32e-08	SFO_MO
17	rs1638525	19848594	C	G	32324	0.39514	0.0456425	0.00781185	5.14e-09	SFO_MO
18	rs142202809	40245191	G	A	32061	0.257478	-0.0548564	0.00879368	4.43e-10	SFO_MO
1	rs2780902	65329100	T	C	32045	0.223748	-0.0552028	0.00884899	4.42e-10	SFO_RD
2	rs76122535	203664929	G	C	31847	0.132791	-0.0845204	0.0108865	8.24e-15	SFO_RD
5	rs33599	82774904	A	G	32136	0.261265	-0.0513726	0.00838254	8.87e-10	SFO_RD
5	rs13164785	82861400	G	T	31991	0.191241	0.0817474	0.00933524	2.01e-18	SFO_RD
6	rs9383542	151041352	T	C	31487	0.39402	0.0445301	0.00760587	4.78e-09	SFO_RD
7	rs112008509	556121	G	A	30837	0.134579	0.0626842	0.0110205	1.29e-08	SFO_RD
8	rs6601691	8176825	A	G	32204	0.431561	0.041114	0.00744468	3.34e-08	SFO_RD
10	rs2863994	105454043	G	T	31661	0.487445	-0.0614809	0.00741914	1.16e-16	SFO_RD
10	rs371240513	105669290	G	A	32082	0.361262	-0.0524912	0.00767379	7.9e-12	SFO_RD
10	rs80232578	124232915	A	C	32068	0.108083	0.0647041	0.0118626	4.91e-08	SFO_RD
11	rs7935166	44636547	A	G	32204	0.132437	0.0626703	0.010827	7.11e-09	SFO_RD
12	rs7314654	20755963	G	A	32112	0.174561	-0.0577032	0.00969224	2.62e-09	SFO_RD
13	rs11838776	111040681	A	G	31031	0.276691	0.0577708	0.00837052	5.14e-12	SFO_RD
1	rs10922264	197566414	A	T	32273	0.105351	0.066905	0.0120371	2.72e-08	SLF_AD
1	rs1040944	232024105	G	C	32282	0.117434	-0.0677134	0.0114146	2.99e-09	SLF_AD
2	rs13030374	204390214	G	A	32308	0.0290021	-0.143263	0.0220059	7.5e-11	SLF_AD
3	rs6789949	13764246	T	C	32143	0.430451	-0.0451117	0.00752176	2e-09	SLF_AD
3	rs76088357	183403207	A	G	31898	0.258041	-0.0596322	0.00850387	2.34e-12	SLF_AD
4	rs13123263	53959626	G	T	31389	0.270636	-0.0468729	0.00843175	2.71e-08	SLF_AD
4	rs6532772	99788986	G	A	31219	0.37727	-0.0460452	0.00777236	3.14e-09	SLF_AD
5	rs11746859	82770558	G	A	32114	0.461014	0.0417346	0.00746271	2.24e-08	SLF_AD
5	rs10052710	82860025	G	T	32274	0.194739	0.0865496	0.00928782	1.18e-20	SLF_AD
6	rs1264321	30859344	A	G	32318	0.151835	-0.0823196	0.0102924	1.26e-15	SLF_AD
6	rs9270542	32559877	G	A	32204	0.279096	0.047875	0.00822227	5.79e-09	SLF_AD
7	rs111219357	518187	C	A	29708	0.40511	-0.054309	0.00783159	4.07e-12	SLF_AD
7	rs76928645	54941328	T	C	31868	0.10112	0.0833818	0.012315	1.28e-11	SLF_AD
8	rs55705857	130645692	G	A	32341	0.055626	0.0951359	0.0161163	3.57e-09	SLF_AD
9	rs28361101	111775756	C	G	32320	0.0261139	-0.126314	0.0231492	4.86e-08	SLF_AD
10	rs2488002	105679341	C	T	32309	0.153347	0.0581346	0.0102213	1.29e-08	SLF_AD
11	rs936514	10481613	A	T	31919	0.454588	0.0606898	0.00747524	4.71e-16	SLF_AD
11	rs873764	19870947	C	T	31720	0.453704	0.0459491	0.00749632	8.81e-10	SLF_AD
11	rs7935166	44636547	A	G	32341	0.132479	0.064365	0.010867	3.16e-09	SLF_AD
11	rs72942468	82426736	A	G	32256	0.109995	-0.0658943	0.0117919	2.3e-08	SLF_AD
13	rs12869774	99100157	A	G	32061	0.0574686	0.0954843	0.0159441	2.12e-09	SLF_AD
17	rs10445402	29661340	G	T	32297	0.381552	-0.0420699	0.00755346	2.55e-08	SLF_AD
17	rs12451761	42673858	T	C	32329	0.44293	-0.0426648	0.00743551	9.58e-09	SLF_AD
17	rs77917260	44339607	T	C	30694	0.198638	0.0798655	0.00947147	3.39e-17	SLF_AD
19	rs7258184	3297571	A	G	32030	0.133718	-0.0719763	0.0109135	4.25e-11	SLF_AD
22	rs9610915	38611080	G	C	31042	0.501224	-0.0434671	0.00754534	8.37e-09	SLF_AD
1	rs1870940	154984363	A	G	31728	0.269147	-0.0487604	0.00882894	3.34e-08	SLF_FA
1	rs113014813	197318309	G	A	32519	0.108367	0.0838953	0.0123667	1.17e-11	SLF_FA
2	rs57537147	54672706	A	C	31957	0.235754	-0.0580491	0.00920652	2.88e-10	SLF_FA
4	rs28795373	54044696	C	T	32552	0.365999	0.0505502	0.00794926	2.03e-10	SLF_FA
5	rs1479569	82377566	T	C	32256	0.433051	0.0434698	0.00782175	2.74e-08	SLF_FA
5	rs1867667	82779013	G	A	32539	0.260918	0.0667852	0.00876328	2.52e-14	SLF_FA
5	rs7733216	82857870	C	T	32051	0.198403	-0.100267	0.00968943	4.27e-25	SLF_FA
5	rs4150221	139719991	C	T	32502	0.266061	0.0604999	0.00871244	3.81e-12	SLF_FA
5	rs13177762	176535206	T	C	30666	0.127927	0.066269	0.0119292	2.77e-08	SLF_FA
6	rs3129787	29048689	T	A	32319	0.28624	0.0506986	0.0085697	3.3e-09	SLF_FA
7	rs4725995	150819169	T	C	31669	0.307888	0.0577184	0.00846987	9.46e-12	SLF_FA
8	rs10106322	88602399	A	G	32387	0.484901	-0.0430291	0.00773912	2.7e-08	SLF_FA
8	rs55705857	130645692	G	A	32560	0.0556358	-0.118132	0.0167776	1.91e-12	SLF_FA
9	rs1246265	86761745	T	C	32231	0.301651	0.0463214	0.00842074	3.78e-08	SLF_FA
10	rs911547	105639421	G	A	32412	0.135984	-0.0626294	0.0112563	2.64e-08	SLF_FA
14	rs12879129	100295418	T	G	32560	0.344579	-0.0484472	0.00809043	2.12e-09	SLF_FA
16	rs4984741	1025464	A	G	32560	0.255743	-0.0544421	0.00881673	6.62e-10	SLF_FA
16	rs17719345	89911681	C	G	32313	0.199966	0.074633	0.00966156	1.12e-14	SLF_FA
17	rs11656743	65980289	G	A	32425	0.200864	-0.0574575	0.00961394	2.28e-09	SLF_FA
20	rs430891	45201501	A	G	32447	0.164252	0.0608087	0.0103702	4.52e-09	SLF_FA
20	rs6062264	61154871	T	C	31836	0.278443	-0.0530421	0.00869668	1.07e-09	SLF_FA
22	rs2267161	30953295	T	C	32560	0.308922	0.0549845	0.00834425	4.41e-11	SLF_FA
22	rs1004763	38474952	C	T	32560	0.420455	-0.0525906	0.00778394	1.42e-11	SLF_FA
1	rs2780902	65329100	T	C	32133	0.223726	-0.0576822	0.00887647	8.12e-11	SLF_MD
1	rs2841614	215186121	C	T	32292	0.0717051	-0.0860851	0.0142839	1.67e-09	SLF_MD
3	rs11128657	13833084	C	T	31420	0.413033	-0.0557309	0.00757093	1.82e-13	SLF_MD
3	rs554632245	183374693	A	G	30311	0.225512	-0.0563214	0.00911647	6.49e-10	SLF_MD
4	rs2412397	54109623	C	T	32179	0.365596	-0.0583579	0.00763486	2.11e-14	SLF_MD
5	rs33599	82774904	A	G	32224	0.261358	-0.0702253	0.00840548	6.56e-17	SLF_MD
5	rs10052710	82860025	G	T	32225	0.194709	0.121954	0.00927705	1.8e-39	SLF_MD
5	rs4150221	139719991	C	T	32235	0.265876	-0.0533612	0.00835761	1.72e-10	SLF_MD
6	rs3129787	29048689	T	A	32052	0.286644	-0.0621197	0.00822004	4.12e-14	SLF_MD
6	rs9400505	112110528	C	T	31987	0.135805	-0.0670089	0.0107753	5.01e-10	SLF_MD
7	rs111219357	518187	C	A	29666	0.405026	-0.0537293	0.00782185	6.46e-12	SLF_MD
7	rs77126132	54966738	A	G	31992	0.0910071	0.0914928	0.0128724	1.18e-12	SLF_MD
8	rs55705857	130645692	G	A	32292	0.0556485	0.128036	0.0160953	1.79e-15	SLF_MD
9	rs28361101	111775756	C	G	32271	0.026138	-0.159409	0.0231137	5.32e-12	SLF_MD
10	rs3910909	49844458	T	C	31932	0.48644	0.0464184	0.00743772	4.35e-10	SLF_MD
10	rs3758575	105454881	A	G	32057	0.503541	0.0473689	0.0074068	1.6e-10	SLF_MD
10	rs7907606	105680632	G	T	32247	0.152433	0.0746301	0.0102475	3.27e-13	SLF_MD
11	rs7935166	44636547	A	G	32292	0.132479	0.0619731	0.0108554	1.14e-08	SLF_MD
11	rs60491498	82433770	A	C	32128	0.11118	-0.065333	0.0117475	2.68e-08	SLF_MD
12	rs11068777	118462095	A	G	30084	0.388412	-0.0460014	0.00784951	4.62e-09	SLF_MD
15	rs35997243	63092900	C	G	32292	0.0144463	0.170052	0.030871	3.62e-08	SLF_MD
17	rs3785891	42990340	T	C	32064	0.355601	-0.056619	0.00772797	2.36e-13	SLF_MD
17	rs55938136	43798360	G	A	32284	0.221921	0.0533323	0.00885558	1.72e-09	SLF_MD
17	rs62086884	65994400	C	G	31964	0.19827	0.0621346	0.00931146	2.51e-11	SLF_MD
20	rs430114	45186397	T	C	32197	0.163447	-0.061205	0.00997552	8.49e-10	SLF_MD
22	rs2267161	30953295	T	C	32292	0.309024	-0.0559845	0.00800382	2.66e-12	SLF_MD
22	rs1004764	38474852	G	A	32137	0.378582	0.0521424	0.00762522	8.02e-12	SLF_MD
1	rs10157465	197312942	C	A	32310	0.106964	0.0770199	0.0123014	3.82e-10	SLF_MO
2	rs12998774	203505125	G	A	32243	0.0354185	-0.121337	0.0205668	3.64e-09	SLF_MO
3	rs4831174	115110804	G	A	32050	0.503822	0.0434926	0.00764449	1.27e-08	SLF_MO
5	rs17802003	11366621	T	A	32069	0.279226	-0.0504798	0.00851763	3.09e-09	SLF_MO
6	rs9373592	149733255	T	A	32298	0.361586	0.0455021	0.0079268	9.45e-09	SLF_MO
7	rs7806951	28865727	T	C	32003	0.146783	0.062551	0.0108073	7.13e-09	SLF_MO
7	rs555224388	96186864	G	A	29905	0.303545	0.0505305	0.00863632	4.89e-09	SLF_MO
7	rs1430622	150850835	A	T	31764	0.334309	0.0481072	0.00816122	3.76e-09	SLF_MO
8	rs7825262	25387948	T	G	32262	0.421208	0.0432278	0.00770636	2.03e-08	SLF_MO
16	rs9935667	87030735	T	G	31676	0.213679	-0.051155	0.00936821	4.75e-08	SLF_MO
16	rs115025067	89787962	A	G	32236	0.158953	0.0608536	0.0104479	5.73e-09	SLF_MO
1	rs2780902	65329100	T	C	32133	0.223758	-0.0522488	0.009032	7.26e-09	SLF_RD
1	rs2841614	215186121	C	T	32292	0.0716896	-0.0814642	0.0145355	2.09e-08	SLF_RD
3	rs11128657	13833084	C	T	31420	0.413049	-0.0515449	0.00770332	2.21e-11	SLF_RD
4	rs2412397	54109623	C	T	32179	0.365596	-0.0572232	0.00776871	1.76e-13	SLF_RD
4	rs35588958	121655414	G	T	31479	0.257219	-0.0485287	0.00874485	2.87e-08	SLF_RD
5	rs1479569	82377566	T	C	31991	0.433153	-0.0432004	0.00763897	1.56e-08	SLF_RD
5	rs1867667	82779013	G	A	32271	0.260993	-0.0715929	0.00854913	5.56e-17	SLF_RD
5	rs7733216	82857870	C	T	31788	0.198361	0.118819	0.00945742	3.35e-36	SLF_RD
5	rs4150221	139719991	C	T	32235	0.265907	-0.0547842	0.0085035	1.17e-10	SLF_RD
6	rs3129787	29048689	T	A	32053	0.286619	-0.0610141	0.008364	2.99e-13	SLF_RD
6	rs9400505	112110528	C	T	31987	0.135836	-0.0664607	0.0109635	1.34e-09	SLF_RD
7	rs9692176	548066	G	T	30491	0.405644	-0.0486261	0.00787673	6.68e-10	SLF_RD
7	rs6979446	55015505	T	C	31892	0.0700646	0.0874318	0.0148015	3.49e-09	SLF_RD
8	rs55705857	130645692	G	A	32292	0.0556175	0.122348	0.0163812	8.09e-14	SLF_RD
9	rs28361101	111775756	C	G	32271	0.026138	-0.149542	0.0235189	2.04e-10	SLF_RD
10	rs10776631	49827148	A	G	32267	0.491911	0.0464816	0.00752816	6.64e-10	SLF_RD
10	rs2863994	105454043	G	T	31746	0.487227	-0.0448528	0.0075715	3.14e-09	SLF_RD
10	rs7907606	105680632	G	T	32247	0.152464	0.0726153	0.0104255	3.28e-12	SLF_RD
12	rs12299431	118440702	T	C	32215	0.379482	0.0439852	0.00775366	1.4e-08	SLF_RD
16	rs56362600	89907947	A	G	32046	0.199011	-0.0666362	0.00944985	1.77e-12	SLF_RD
17	rs2027995	43161353	C	T	32234	0.332165	-0.0509248	0.00800667	2.01e-10	SLF_RD
17	rs62086884	65994400	C	G	31964	0.198286	0.0629899	0.00947461	2.97e-11	SLF_RD
19	rs7343092	2459093	A	G	31837	0.0777397	-0.0782748	0.0140937	2.79e-08	SLF_RD
20	rs430114	45186397	T	C	32197	0.163385	-0.0664769	0.0101512	5.81e-11	SLF_RD
22	rs59731356	30764664	C	T	32233	0.324853	-0.055006	0.0080557	8.6e-12	SLF_RD
22	rs2018980	38450620	A	G	32134	0.370184	0.0514522	0.00777953	3.75e-11	SLF_RD
3	rs11128657	13833084	C	T	31479	0.413148	-0.0429094	0.0077598	3.21e-08	SS_AD
5	rs11746859	82770558	G	A	32126	0.46106	0.0476366	0.00763962	4.5e-10	SS_AD
5	rs10052710	82860025	G	T	32286	0.194775	0.116099	0.00950741	2.7e-34	SS_AD
6	rs9267445	31483481	C	G	32318	0.140231	-0.0736542	0.0108727	1.25e-11	SS_AD
7	rs151057105	54944920	T	C	32080	0.0918017	0.0746481	0.0131386	1.33e-08	SS_AD
8	rs2956042	75078802	T	A	32228	0.261419	0.0548653	0.00860898	1.85e-10	SS_AD
11	rs2071020	10478228	T	C	32167	0.455824	0.0497505	0.00762238	6.71e-11	SS_AD
11	rs61902245	95517737	T	C	32048	0.417639	0.0457953	0.00771888	2.98e-09	SS_AD
17	rs7213273	43155914	G	A	32290	0.346965	-0.0510596	0.00797021	1.49e-10	SS_AD
19	rs35482402	7165684	A	G	32124	0.235431	-0.0515808	0.00894141	7.99e-09	SS_AD
22	rs2267161	30953295	T	C	32353	0.309013	-0.0653045	0.00820363	1.71e-15	SS_AD
5	rs1847037	81900820	T	C	32110	0.293647	-0.0513671	0.00843966	1.15e-09	SS_FA
5	rs33599	82774904	A	G	32493	0.261318	0.0592616	0.00868209	8.75e-12	SS_FA
5	rs67827860	82860485	T	C	32431	0.190928	-0.119055	0.00966044	6.73e-35	SS_FA
6	rs225746	142562563	T	A	32274	0.228621	0.0500483	0.00911705	4.03e-08	SS_FA
7	rs28376477	541032	G	C	32137	0.48578	0.0449245	0.00766516	4.6e-09	SS_FA
8	rs9650410	24759930	G	A	32317	0.499319	-0.0418652	0.00762497	4.01e-08	SS_FA
8	rs55705857	130645692	G	A	32562	0.055663	-0.127673	0.0166152	1.54e-14	SS_FA
10	rs10776631	49827148	A	G	32536	0.491901	-0.0419664	0.00763849	3.93e-08	SS_FA
11	rs151035694	262106	A	G	32253	0.0864571	0.0870035	0.0136214	1.69e-10	SS_FA
16	rs4984741	1025464	A	G	32562	0.255635	-0.0549567	0.00873391	3.13e-10	SS_FA
17	rs113882147	42901884	C	T	32502	0.157513	0.0877393	0.0104889	6.01e-17	SS_FA
17	rs7211615	79607600	G	A	32518	0.492204	0.046505	0.00760506	9.66e-10	SS_FA
18	rs9966170	35029506	A	G	32562	0.363629	-0.0675719	0.00794784	1.86e-17	SS_FA
19	rs79569934	5900471	T	C	32562	0.13373	0.0636976	0.0110643	8.56e-09	SS_FA
22	rs9608859	30667277	T	C	31824	0.444602	-0.0484364	0.00775706	4.26e-10	SS_FA
22	rs5756894	38450136	C	A	32390	0.393547	-0.0616286	0.00780281	2.83e-15	SS_FA
3	rs11128657	13833084	C	T	31462	0.413102	-0.0521025	0.00774726	1.75e-11	SS_MD
3	rs71318332	183354008	A	G	32326	0.160861	-0.0643021	0.0102622	3.71e-10	SS_MD
4	rs4254834	54095119	C	G	32285	0.365928	-0.0495215	0.00780751	2.26e-10	SS_MD
4	rs4862340	185124305	A	G	31516	0.392705	-0.0438806	0.00780027	1.85e-08	SS_MD
5	rs33599	82774904	A	G	32268	0.261389	-0.0748852	0.0086001	3.11e-18	SS_MD
5	rs10052710	82860025	G	T	32269	0.194707	0.154127	0.00949421	2.91e-59	SS_MD
6	rs9379831	26175852	A	C	32336	0.305449	0.0455853	0.00816467	2.36e-08	SS_MD
6	rs497309	31892484	C	A	32336	0.132345	-0.0793035	0.0111342	1.06e-12	SS_MD
6	rs9320378	112172746	A	G	32068	0.192606	-0.0536686	0.00960776	2.32e-08	SS_MD
6	rs4128460	142355986	G	A	31829	0.207028	-0.054345	0.00940377	7.51e-09	SS_MD
7	rs9692176	548066	G	T	30534	0.405695	-0.0569383	0.0079207	6.55e-13	SS_MD
8	rs1693551	101675584	C	T	32336	0.465271	0.0445938	0.0075674	3.8e-09	SS_MD
8	rs55705857	130645692	G	A	32336	0.0556037	0.128257	0.0164754	6.98e-15	SS_MD
10	rs10776632	49832703	T	G	32310	0.492758	0.0441114	0.00757135	5.67e-09	SS_MD
10	rs911547	105639421	G	A	32189	0.135947	0.072805	0.0110521	4.47e-11	SS_MD
11	rs939924	257308	C	T	32025	0.0900703	-0.0890237	0.0132448	1.8e-11	SS_MD
11	rs7935166	44636547	A	G	32336	0.132499	0.0630666	0.0111068	1.36e-08	SS_MD
11	rs1390978	82424372	C	T	32336	0.111161	-0.0739146	0.0119879	7.01e-10	SS_MD
11	rs523153	95570961	A	G	32190	0.420736	0.0474703	0.00768632	6.58e-10	SS_MD
12	rs34421054	118437058	T	C	30605	0.277504	0.0499756	0.00867977	8.53e-09	SS_MD
17	rs7216587	42947314	C	T	32336	0.16109	-0.0827518	0.0102955	9.16e-16	SS_MD
17	rs9899380	43173131	C	G	31760	0.425283	-0.0531445	0.00772737	6.09e-12	SS_MD
22	rs2267161	30953295	T	C	32336	0.309052	-0.0691656	0.00819119	3.07e-17	SS_MD
22	rs742396	38452254	C	G	32300	0.375062	0.0545784	0.00778627	2.39e-12	SS_MD
12	rs12146713	106476805	C	T	32353	0.0947207	0.0941824	0.0130337	4.97e-13	SS_MO
15	rs2074585	91009484	G	A	32353	0.490897	0.0460763	0.00765218	1.73e-09	SS_MO
16	rs35153	64978158	A	G	32083	0.471558	-0.0465674	0.00766667	1.25e-09	SS_MO
3	rs6442409	13835087	T	C	31452	0.342617	-0.0484089	0.00806504	1.95e-09	SS_RD
3	rs3755651	183366595	A	G	32324	0.16084	-0.0583344	0.0102704	1.35e-08	SS_RD
4	rs71597835	54200100	A	G	31098	0.344588	-0.0488545	0.00808337	1.51e-09	SS_RD
5	rs33599	82774904	A	G	32265	0.26132	-0.07308	0.00860643	2.04e-17	SS_RD
5	rs7733216	82857870	C	T	31829	0.198388	0.147545	0.00951724	3.31e-54	SS_RD
6	rs3129129	29124189	A	G	32325	0.226852	-0.058834	0.00901599	6.78e-11	SS_RD
6	rs4128460	142355986	G	A	31826	0.207079	-0.0542329	0.00940981	8.24e-09	SS_RD
7	rs9692176	548066	G	T	30530	0.405617	-0.0558274	0.0079267	1.88e-12	SS_RD
7	rs55761404	18903580	G	A	32015	0.372607	-0.0446256	0.00784025	1.26e-08	SS_RD
8	rs1693551	101675584	C	T	32333	0.465283	0.0443403	0.0075724	4.76e-09	SS_RD
8	rs55705857	130645692	G	A	32333	0.0556243	0.130839	0.016484	2.07e-15	SS_RD
9	rs3793477	86594719	C	G	32304	0.270648	0.0493755	0.00850021	6.29e-09	SS_RD
10	rs10776632	49832703	T	G	32307	0.492757	0.0436027	0.00757567	8.63e-09	SS_RD
10	rs911547	105639421	G	A	32186	0.135975	0.0724985	0.0110574	5.51e-11	SS_RD
11	rs939924	257308	C	T	32022	0.0900787	-0.0875103	0.0132533	4.03e-11	SS_RD
11	rs12421066	82414980	T	C	32284	0.110999	-0.0668137	0.0120131	2.67e-08	SS_RD
12	rs12299431	118440702	T	C	32256	0.379371	0.0434522	0.00780192	2.56e-08	SS_RD
16	rs4984741	1025464	A	G	32333	0.255791	0.0518051	0.00865972	2.2e-09	SS_RD
17	rs113882147	42901884	C	T	32273	0.157376	-0.0864002	0.0104072	1.02e-16	SS_RD
17	rs17746351	43162776	G	C	32309	0.449472	0.0490425	0.00758942	1.03e-10	SS_RD
17	rs11656743	65980289	G	A	32199	0.200985	0.0526633	0.00944326	2.45e-08	SS_RD
19	rs79569934	5900471	T	C	32333	0.133965	-0.0630399	0.010961	8.86e-09	SS_RD
22	rs73166584	30649229	T	C	31532	0.168939	-0.0580278	0.0101874	1.23e-08	SS_RD
22	rs2267161	30953295	T	C	32333	0.309096	-0.0565868	0.0081962	5.05e-12	SS_RD
22	rs742396	38452254	C	G	32297	0.375066	0.0594899	0.00779189	2.26e-14	SS_RD
1	rs12123258	215160498	C	T	31931	0.0673483	-0.0842785	0.0145973	7.76e-09	UNC_AD
2	rs7596872	56128091	A	C	31994	0.0981434	0.0821489	0.0123425	2.82e-11	UNC_AD
3	rs2313213	183320787	T	C	30110	0.135022	-0.0615945	0.0110425	2.43e-08	UNC_AD
5	rs7733216	82857870	C	T	31695	0.198328	0.0641195	0.00920384	3.25e-12	UNC_AD
6	rs275350	151016058	C	G	32056	0.412045	0.0546644	0.00742868	1.86e-13	UNC_AD
8	rs10112193	74016679	G	T	32041	0.263366	-0.0487797	0.00833175	4.78e-09	UNC_AD
10	rs4917404	105631126	T	C	32089	0.424242	0.040507	0.00741719	4.73e-08	UNC_AD
14	rs160460	59072964	G	A	31652	0.427951	-0.0432479	0.00743281	5.94e-09	UNC_AD
14	rs10135369	59492298	T	C	31986	0.120678	-0.0639621	0.0112178	1.19e-08	UNC_AD
16	rs7199751	86609302	T	C	30802	0.21346	0.0503909	0.00911143	3.19e-08	UNC_AD
16	rs12928520	87237568	T	C	29794	0.444167	0.0447453	0.00761375	4.18e-09	UNC_AD
17	rs936393	73847613	G	A	31920	0.187124	0.062582	0.00940057	2.79e-11	UNC_AD
3	rs7428430	50174184	T	C	32458	0.491527	0.0442003	0.00771179	9.95e-09	UNC_FA
3	rs7650184	89530057	A	C	32475	0.3998	-0.0543232	0.00785448	4.64e-12	UNC_FA
3	rs9847565	146369166	G	C	32056	0.45837	0.0436377	0.00769552	1.42e-08	UNC_FA
5	rs309587	82856519	C	T	31753	0.313545	-0.0709296	0.00829317	1.2e-17	UNC_FA
6	rs3129787	29048689	T	A	32325	0.286234	0.0470456	0.00853993	3.61e-08	UNC_FA
6	rs9399246	138869438	T	C	32281	0.281512	-0.0473113	0.00856462	3.31e-08	UNC_FA
7	rs12699999	18904264	G	A	32375	0.358209	0.0502786	0.00800365	3.34e-10	UNC_FA
7	rs10252734	81418596	G	T	32450	0.402743	-0.0516411	0.00784073	4.51e-11	UNC_FA
7	rs4128399	151498679	C	T	31140	0.159859	0.059914	0.0106701	1.96e-08	UNC_FA
8	rs72673629	120931207	G	A	31744	0.437595	-0.0438474	0.00783236	2.17e-08	UNC_FA
9	rs113688696	98199396	A	G	32491	0.0786987	-0.0823991	0.0142138	6.75e-09	UNC_FA
14	rs73313052	59625997	A	G	32343	0.120474	-0.0712339	0.0118312	1.74e-09	UNC_FA
15	rs2411244	39371190	T	G	32502	0.441742	0.0514986	0.00772307	2.59e-11	UNC_FA
17	rs9890574	38272327	T	A	32450	0.254253	0.0511726	0.00882427	6.67e-09	UNC_FA
17	rs55823223	73890363	A	G	32566	0.145934	-0.0613655	0.0108088	1.37e-08	UNC_FA
22	rs1062687	39134715	C	T	32459	0.295665	-0.0508357	0.00840185	1.44e-09	UNC_FA
2	rs72789836	33141014	C	T	31728	0.0645329	-0.0847409	0.0149556	1.46e-08	UNC_MD
2	rs7596872	56128091	A	C	31622	0.0978116	0.0793594	0.012416	1.64e-10	UNC_MD
3	rs76088357	183403207	A	G	31390	0.258267	-0.0463946	0.0084428	3.9e-08	UNC_MD
5	rs33599	82774904	A	G	31756	0.261447	-0.0513843	0.00835644	7.79e-10	UNC_MD
5	rs7733216	82857870	C	T	31330	0.198564	0.0924709	0.00923149	1.28e-23	UNC_MD
6	rs275350	151016058	C	G	31683	0.411767	0.0515364	0.00745772	4.83e-12	UNC_MD
7	rs6461387	18898305	A	G	31419	0.383255	-0.0458927	0.00759346	1.51e-09	UNC_MD
7	rs10252734	81418596	G	T	31711	0.402447	0.0491816	0.00750382	5.59e-11	UNC_MD
8	rs76859055	131085037	G	A	31530	0.41562	0.0410042	0.00748093	4.23e-08	UNC_MD
10	rs4630220	105459116	A	G	30948	0.284057	-0.0499052	0.00825896	1.52e-09	UNC_MD
16	rs12928520	87237568	T	C	29448	0.443901	0.0423471	0.00764092	2.99e-08	UNC_MD
17	rs8081606	73862646	T	C	31746	0.188307	0.0735625	0.00938591	4.59e-15	UNC_MD
1	rs4373707	2798712	T	C	31695	0.466383	-0.0438349	0.00772316	1.38e-08	UNC_MO
2	rs884895	19184996	A	G	32273	0.151504	0.0610896	0.0106319	9.14e-09	UNC_MO
2	rs13018971	71956471	A	G	32146	0.35065	-0.0514384	0.00802919	1.49e-10	UNC_MO
6	rs9493458	133155584	C	A	32130	0.358901	-0.0457625	0.00796538	9.18e-09	UNC_MO
7	rs4472416	19613917	A	G	31955	0.337819	0.0448705	0.0080913	2.93e-08	UNC_MO
8	rs10111936	121616599	T	C	32108	0.0414538	-0.104461	0.0190931	4.47e-08	UNC_MO
2	rs72789836	33141014	C	T	31842	0.0644903	-0.0848413	0.0152163	2.47e-08	UNC_RD
2	rs7596872	56128091	A	C	31735	0.0979045	0.0707962	0.0126237	2.04e-08	UNC_RD
3	rs7428430	50174184	T	C	31832	0.49111	-0.0436638	0.00751213	6.16e-09	UNC_RD
3	rs342909	146341963	T	C	31488	0.372856	0.0438633	0.00775823	1.57e-08	UNC_RD
4	rs12507127	7920267	C	A	30916	0.37031	-0.0429764	0.00786058	4.57e-08	UNC_RD
5	rs309587	82856519	C	T	31142	0.313323	0.0745101	0.00807723	2.84e-20	UNC_RD
6	rs34470113	28607995	T	C	31859	0.268292	-0.0467376	0.00844014	3.07e-08	UNC_RD
7	rs12699998	18904175	G	A	31729	0.371411	-0.0493477	0.00774552	1.88e-10	UNC_RD
7	rs10252734	81418596	G	T	31826	0.402407	0.0535516	0.00763394	2.3e-12	UNC_RD
10	rs61871257	105324242	C	T	31707	0.215568	-0.0510893	0.00911639	2.09e-08	UNC_RD
17	rs8081606	73862646	T	C	31861	0.1886	0.0755511	0.0095416	2.41e-15	UNC_RD
22	rs470106	39116795	C	A	31848	0.295733	0.0452589	0.0081789	3.14e-08	UNC_RD

## Sheet: 6
IVs in reverse MR
CHR	SNP	POS	Effect_allele	Other_allele	EAF	SE	P	Beta	Ncase	Ncontrol	N	Exposure
16	rs1162202	61966703	C	T	0.63	0.0102	1.922e-09	0.0613961	38429	186581	225534	ADHD
20	rs6082363	21250843	T	C	0.296	0.0101	4.375e-12	0.0703	38691	186843	225534	ADHD
3	rs2886697	20724204	G	A	0.634	0.0096	7.898e-10	0.0587971	38691	186843	225534	ADHD
10	rs11255890	8784773	C	A	0.389	0.0097	4.144e-08	0.0530003	38691	186843	225534	ADHD
4	rs17576773	112217523	C	T	0.888	0.0151	1.625e-10	0.0963006	38067	185088	225534	ADHD
3	rs115111850	43651029	A	G	0.944	0.0204	1.707e-08	-0.114895	38691	186843	225534	ADHD
10	rs11596214	106453832	G	A	0.597	0.0095	3.167e-08	0.0528012	38691	186843	225534	ADHD
6	rs2025286	70858701	A	C	0.553	0.0093	3.997e-09	-0.0548998	38691	186843	225534	ADHD
5	rs77960	103964585	G	A	0.665	0.01	2.462e-13	-0.0732053	38691	186843	225534	ADHD
5	rs10875612	144474779	C	T	0.483	0.0093	5.624e-09	-0.0542978	38691	186843	225534	ADHD
8	rs7844069	93277087	T	G	0.428	0.0095	6.736e-09	0.0551982	38691	186843	225534	ADHD
18	rs76857496	5871800	C	A	0.87	0.014	1.242e-08	0.0800027	38691	186843	225534	ADHD
5	rs4916723	87854395	A	C	0.553	0.011	9.477e-15	-0.0852965	30410	48850	225534	ADHD
7	rs73145587	67685754	A	T	0.91	0.0184	3.665e-08	0.101301	30410	48850	225534	ADHD
8	rs10099100	10576775	C	G	0.341	0.0147	1.065e-08	0.0843044			46350	ASD
20	rs910805	21248116	A	G	0.2356	0.016	2.041e-09	-0.0956963			46350	ASD
1	rs2310819	66440096	T	C	0.5361	0.00238851	1.537e-11	0.0161081			352363	AUD
1	rs60427825	73852274	A	T	0.4124	0.00247837	4.458e-09	0.0145381			335886	AUD
1	rs372701525	80860383	A	C	0.2775	0.00280973	1.658e-08	0.0158581			315862	AUD
1	rs7531138	97923499	A	T	0.4484	0.00239511	2.1e-09	-0.0143467			352358	AUD
2	rs2683632	58116640	T	C	0.6118	0.00244421	5.036e-11	-0.0160585			352350	AUD
2	rs12620018	73906408	A	G	0.6363	0.00249371	2.88e-09	-0.0148077			347398	AUD
2	rs35942385	144208523	T	G	0.3554	0.00248871	8.16e-16	-0.0200391			352318	AUD
2	rs72859290	147981914	A	G	0.0376	0.00629842	2.318e-09	0.0376267			348272	AUD
2	rs57761252	161865998	A	G	0.2047	0.00298666	2.025e-08	-0.0167551			344280	AUD
2	rs2059924	185785947	T	G	0.3966	0.00243494	3.335e-08	0.0134482			352370	AUD
3	rs6442644	16852853	T	G	0.6885	0.00279569	5.723e-09	-0.0162849			298249	AUD
3	rs1248850	84887559	T	C	0.5106	0.00238287	5.317e-10	0.0147952			352354	AUD
4	rs13146907	39425248	A	G	0.6183	0.00247583	1.295e-20	0.0230475			345539	AUD
4	rs1229984	100239319	T	C	0.0341	0.00665368	1e-200	-0.203017			341962	AUD
4	rs56009681	100285772	A	T	0.8965	0.00391815	1.478e-42	-0.0535728			350822	AUD
4	rs4546191	139847208	A	G	0.7974	0.00296352	3.741e-10	-0.0185635			352362	AUD
6	rs2784867	163840529	A	G	0.6733	0.00254362	4.039e-08	0.0139619			351295	AUD
7	rs10253153	1001974	A	G	0.2611	0.00271571	8.871e-09	-0.015618			351374	AUD
7	rs1155397	114953597	A	G	0.3281	0.00253694	4.637e-11	0.0166981			352359	AUD
7	rs2696884	135144662	T	C	0.4015	0.00242983	8.844e-14	0.0181193			352370	AUD
7	rs2098112	153487944	A	G	0.4653	0.00250683	3.19e-09	0.0148455			319763	AUD
8	rs13276082	21823184	A	G	0.5777	0.00241165	4.564e-09	0.0141371			352352	AUD
8	rs2576589	57425647	T	C	0.7522	0.00275962	1.136e-09	-0.0168033			352202	AUD
8	rs1822717	64956228	T	C	0.4805	0.00238418	3.315e-11	0.0158119			352337	AUD
10	rs1291854	11110195	T	C	0.4409	0.00239915	2.149e-08	-0.0134352			352360	AUD
10	rs7912192	110486177	A	G	0.7506	0.00281955	1.6e-13	0.0208054			335920	AUD
11	rs11214596	113264511	C	G	0.4774	0.00238481	7.22e-11	0.0155394			352338	AUD
11	rs6589386	113443753	T	C	0.4132	0.00241891	8.569e-20	-0.0220266			352354	AUD
11	rs4936651	121634608	T	G	0.2327	0.00281886	1.504e-14	-0.0216685			352362	AUD
12	rs1921035	81602449	A	G	0.5209	0.00238451	2.105e-09	0.0142832			352327	AUD
13	rs9302094	96852740	A	C	0.5537	0.00239616	2.592e-08	0.0133394			352371	AUD
13	rs73591198	108213021	A	G	0.0938	0.00409613	2.195e-08	-0.0229219			350555	AUD
14	rs850254	57350427	A	G	0.5527	0.00239563	1.426e-08	-0.0135832			352373	AUD
15	rs34488670	47684936	T	C	0.7845	0.00290303	5.106e-14	-0.0218569			350878	AUD
16	rs1421085	53800954	T	C	0.5923	0.00242381	6.692e-19	0.0215234			352366	AUD
17	rs854784	18040690	T	C	0.5388	0.00238953	2.42e-10	0.0151305			352354	AUD
20	rs1535375	31163048	T	C	0.2508	0.00276479	2.723e-08	0.0153667			348083	AUD
20	rs403598	31634788	A	G	0.0528	0.0056402	4.388e-08	-0.0308744			314242	AUD
20	rs7272308	48583726	A	G	0.2782	0.00265898	3.658e-08	0.014643			352149	AUD
2	rs4619651	97416153	G	A	0.691	0.0101	5.174e-11	0.0660967	40463	313436	413466	BD_1
22	rs5758064	41153879	T	C	0.524	0.0094	1.794e-08	0.0526968	40463	313436	413466	BD_1
16	rs12932628	89632725	G	T	0.523	0.0099	6.869e-09	-0.0570996	40056	296227	413466	BD_1
17	rs228768	42191893	G	T	0.323	0.0102	2.45e-10	0.064701	40463	313436	413466	BD_1
15	rs35958438	38973793	G	A	0.783	0.0117	2.716e-08	0.065104	38491	120834	413466	BD_1
9	rs62581014	141066490	C	T	0.62	0.0117	2.774e-08	-0.0652001	39543	312463	413466	BD_1
3	rs9834970	36856030	T	C	0.487	0.0094	1.278e-18	-0.0824038	40463	313436	413466	BD_1
1	rs10737496	163745389	C	T	0.467	0.0094	7.464e-09	0.0542041	40463	313436	413466	BD_1
5	rs28565152	7542911	G	A	0.744	0.0112	3.294e-09	-0.0663001	38705	307499	413466	BD_1
7	rs11764361	105043229	A	G	0.671	0.0104	4.563e-09	0.0611986	40463	313436	413466	BD_1
7	rs113779084	11871787	G	A	0.685	0.0102	2.125e-13	-0.0751008	40463	313436	413466	BD_1
10	rs2273738	111648659	C	T	0.846	0.0137	1.811e-11	-0.0916987	40463	313436	413466	BD_1
11	rs12575685	70517927	G	A	0.674	0.0102	1.707e-10	-0.0648052	40463	313436	413466	BD_1
7	rs12154473	1982181	A	G	0.389	0.0096	2.283e-09	-0.0575973	40463	313436	413466	BD_1
14	rs2693698	99719219	A	G	0.439	0.0094	2.605e-08	-0.0525994	40463	313436	413466	BD_1
6	rs4331993	152793572	T	A	0.633	0.0098	2.298e-08	-0.054604	40056	296227	413466	BD_1
10	rs61846516	62123438	C	G	0.935	0.0194	8.102e-12	-0.132595	40133	313283	413466	BD_1
1	rs2126180	61105668	G	A	0.537	0.0094	1.877e-09	-0.0564963	40463	313436	413466	BD_1
7	rs10255167	140676153	G	A	0.216	0.0118	2.653e-08	-0.065499	38491	120834	413466	BD_1
6	rs41315395	32201469	C	A	0.823	0.0127	4.411e-08	-0.0697038	39558	271522	413466	BD_1
12	rs2159100	2346393	C	T	0.651	0.0098	3.98e-15	-0.0772051	40463	313436	413466	BD_1
2	rs13417268	169481837	C	G	0.768	0.011	2.998e-08	0.0611986	40463	313436	413466	BD_1
5	rs10866641	169289206	T	C	0.578	0.0094	4.181e-11	0.0621012	40463	313436	413466	BD_1
7	rs6954854	21492589	G	A	0.437	0.0094	6.297e-10	0.0582972	40463	313436	413466	BD_1
15	rs748455	85149575	T	C	0.713	0.0103	1.803e-10	0.0656005	40463	313436	413466	BD_1
6	rs10455979	166995260	C	G	0.512	0.0095	8.838e-09	-0.0544984	40056	296227	413466	BD_1
20	rs67712855	43682551	T	G	0.704	0.0103	7.704e-11	0.0669014	40056	296227	413466	BD_1
20	rs237460	48033127	C	T	0.562	0.0094	4.203e-09	-0.0553964	40463	313436	413466	BD_1
5	rs6887473	80961069	G	A	0.728	0.0105	7.652e-09	0.0605964	40463	313436	413466	BD_1
7	rs6946056	131870597	A	C	0.381	0.0097	4.343e-08	-0.053	40463	313436	413466	BD_1
15	rs4447398	42904904	A	C	0.137	0.0138	2.754e-09	0.0822986	40463	313436	413466	BD_1
1	rs1526480	91209986	T	C	0.4085	0.0084	5.906e-10	-0.0519			886025	CUD
5	rs159365	60500273	A	G	0.3996	0.0083	3.33e-08	0.0461			886025	CUD
11	rs2155290	112851068	C	G	0.4314	0.0085	6.07e-09	-0.0493			886025	CUD
5	rs56070621	30825684	A	T	0.4225	0.0084	1.151e-08	0.048			886025	CUD
8	rs56372821	27436500	A	G	0.1551	0.0119	7.272e-14	-0.0887			886025	CUD
11	rs61904987	113517203	T	C	0.1064	0.0121	2.048e-08	0.0681			886025	CUD
16	rs62051488	72652784	A	C	0.1093	0.0131	2.976e-08	-0.0725			886025	CUD
7	rs62461183	77716309	T	C	0.162	0.0113	5.863e-10	0.0697			886025	CUD
11	rs6484345	27996573	A	G	0.1859	0.0203	1.634e-08	0.1147			886025	CUD
1	rs6690119	73580964	T	C	0.4433	0.0086	4.995e-08	0.0467			886025	CUD
2	rs719504	22918025	A	G	0.3499	0.0163	2.533e-08	0.0909			886025	CUD
3	rs726610	85551403	T	C	0.3489	0.0085	4.288e-11	-0.0563			886025	CUD
1	rs7519259	66434743	A	G	0.4702	0.0083	1.83e-09	0.0501			886025	CUD
13	rs80030908	55159898	A	G	0.01889	0.0305	2.127e-08	0.171			886025	CUD
6	rs9344740	88619412	T	G	0.3062	0.0091	8.344e-10	-0.0556			886025	CUD
7	rs62442924	1989976	C	T	0.786	0.0052	1.001e-13	0.0385955	166773	507679	713314	MDD
7	rs73035954	3563804	C	T	0.744	0.0048	1.147e-08	0.0274984	166773	507679	713314	MDD
9	rs10465137	122659596	C	T	0.382	0.0043	5.287e-10	-0.0267958	166773	507679	713314	MDD
20	rs6063085	45840459	A	C	0.65	0.0046	6.973e-10	0.0284028	166773	507679	713314	MDD
14	rs1950829	42097937	A	G	0.501	0.0042	1.224e-10	0.0267977	166773	507679	713314	MDD
8	rs10097643	40330562	A	G	0.523	0.0042	4.381e-08	0.0228959	166773	507679	713314	MDD
2	rs17255455	175239185	A	C	0.424	0.0042	4.478e-10	-0.0263029	166773	507679	713314	MDD
11	rs612823	133834104	T	C	0.586	0.0044	2.216e-09	0.0263011	166773	507679	713314	MDD
1	rs10890032	73789324	T	C	0.373	0.0043	3.732e-12	0.0299956	166773	507679	713314	MDD
1	rs7531118	72837239	T	C	0.489	0.0046	1.068e-10	-0.0295009	166773	507679	713314	MDD
5	rs1372500	103758742	T	C	0.647	0.0045	8.179e-10	-0.0275048	166773	507679	713314	MDD
5	rs78765360	7418682	C	T	0.78	0.0051	9.494e-09	0.0291995	166773	507679	713314	MDD
18	rs9964724	35159124	C	T	0.312	0.0045	3.768e-09	0.026603	166773	507679	713314	MDD
2	rs4663414	235352188	T	G	0.379	0.0044	2.545e-08	0.0246048	166773	507679	713314	MDD
2	rs283466	233667744	A	G	0.604	0.0043	1.677e-08	-0.0243952	166773	507679	713314	MDD
5	rs60157091	61509655	C	T	0.482	0.0041	2.494e-08	-0.0231049	166773	507679	713314	MDD
15	rs4776729	66399197	A	G	0.87	0.0065	1.597e-08	-0.0367988	165822	501565	713314	MDD
2	rs13017298	184480789	G	A	0.673	0.0045	3.092e-08	0.0250048	166773	507679	713314	MDD
9	rs1931388	11203149	A	G	0.599	0.0043	8.383e-10	0.026603	166773	507679	713314	MDD
3	rs1488627	44226923	C	G	0.649	0.0044	2.61e-08	-0.0246001	165822	501565	713314	MDD
2	rs6732156	208044947	C	T	0.639	0.0044	6.691e-09	-0.0253999	166773	507679	713314	MDD
18	rs7236656	53107115	G	A	0.368	0.0043	4.13e-08	0.023697	166773	507679	713314	MDD
18	rs1239771	77565620	C	T	0.8	0.0072	1.484e-08	0.0407964	166773	507679	713314	MDD
3	rs7629352	16848835	A	G	0.69	0.0045	1.18e-09	-0.0272993	166773	507679	713314	MDD
1	rs12028164	197820790	C	A	0.494	0.0043	7.643e-11	-0.0279983	166773	507679	713314	MDD
6	rs11756123	152218079	A	T	0.359	0.0044	5.61e-14	0.0332994	166773	507679	713314	MDD
2	rs13414880	214898281	C	T	0.912	0.0077	4.809e-08	-0.0423023	166773	507679	713314	MDD
16	rs2059251	60730790	T	A	0.506	0.0042	4.361e-08	0.0228959	166773	507679	713314	MDD
6	rs9353368	64648161	T	C	0.706	0.0046	3.591e-10	0.0287041	166773	507679	713314	MDD
9	rs112535944	140278206	C	A	0.871	0.0068	5.143e-09	-0.039604	166773	507679	713314	MDD
4	rs7674555	140940364	A	C	0.471	0.0042	4.387e-08	0.0228959	166773	507679	713314	MDD
11	rs12800853	113302514	C	T	0.424	0.0042	4.784e-12	0.0292966	166773	507679	713314	MDD
9	rs10992800	96373818	G	A	0.612	0.0043	2.539e-10	0.0274984	166773	507679	713314	MDD
10	rs17117923	106676091	T	C	0.751	0.0048	2.209e-11	0.0323026	166773	507679	713314	MDD
15	rs17514846	91416550	A	C	0.4612	0.00593998	7.865e-09	-0.0342796			56994	OUD
6	rs1799971	154360797	A	G	0.162	0.00803638	4.919e-09	0.0470128			56994	OUD
2	rs6759922	22450249	A	G	0.4573	0.00177627	1.134e-18	0.0156685			1222882	PTSD
11	rs2186710	112827048	C	G	0.5453	0.00181399	2.777e-17	-0.0153391			1222882	PTSD
1	rs12128161	73837417	A	C	0.6153	0.00181447	3.231e-15	-0.0143017			1222882	PTSD
3	rs11130221	49819102	C	G	0.5126	0.00176717	2.328e-13	-0.0129498			1222882	PTSD
6	rs9479138	152215199	T	G	0.3493	0.00188773	3.541e-13	0.0137276			1222882	PTSD
5	rs2135029	155856538	A	G	0.6061	0.00180924	4.137e-13	-0.0131188			1222882	PTSD
15	rs17514846	91416550	A	C	0.459	0.00192564	6.436e-12	-0.0132291			1222882	PTSD
7	rs34809719	2028968	T	G	0.2088	0.00217196	7.433e-12	-0.0148757			1222882	PTSD
14	rs2899991	47273964	T	C	0.4752	0.00176805	7.909e-12	0.0120935			1222882	PTSD
2	rs10496632	125014321	C	G	0.286	0.00196047	2.395e-11	-0.013096			1222882	PTSD
8	rs4129585	143312933	A	C	0.4323	0.001782	2.847e-11	0.0118574			1222882	PTSD
5	rs13161130	107050023	C	G	0.2424	0.00206527	2.935e-11	-0.013734			1222882	PTSD
7	rs10487459	126378255	A	G	0.6122	0.0018118	1.045e-10	-0.0117042			1222882	PTSD
15	rs7170398	78067633	T	C	0.4115	0.00183803	1.053e-10	0.0118718			1222882	PTSD
1	rs9651063	191391663	T	C	0.3674	0.00187147	1.467e-10	0.0119942			1222882	PTSD
1	rs4652676	181698693	A	G	0.2477	0.00204789	1.595e-10	0.0130983			1222882	PTSD
3	rs748832	16851202	A	G	0.627	0.00182547	1.804e-10	-0.011641			1222882	PTSD
5	rs33817	103978326	A	G	0.4276	0.00178519	2.044e-10	0.0113503			1222882	PTSD
7	rs2470937	104579775	A	T	0.4503	0.00177463	4.222e-10	0.0110844			1222882	PTSD
14	rs10132977	103370119	T	C	0.1741	0.00232809	4.741e-10	0.014497			1222882	PTSD
18	rs896686	53123031	T	G	0.8296	0.00235361	5.82e-10	0.0145806			1222882	PTSD
7	rs58043442	82517273	T	C	0.4884	0.00177032	6.438e-10	-0.0109388			1222882	PTSD
9	rs13290462	31215058	T	G	0.6692	0.00205889	1.575e-09	0.0124295			1222882	PTSD
2	rs197261	161904823	A	G	0.7183	0.00196725	2.051e-09	0.0117917			1222882	PTSD
14	rs7141058	69751819	A	G	0.4797	0.00176735	2.138e-09	-0.0105811			1222882	PTSD
3	rs1541903	71324328	T	C	0.1337	0.00259396	2.873e-09	0.0154055			1222882	PTSD
3	rs6800637	18775592	A	T	0.7112	0.00211132	3.16e-09	0.0125053			1222882	PTSD
5	rs13168358	153133722	T	C	0.2222	0.00212353	4.269e-09	-0.0124715			1222882	PTSD
7	rs2107448	21485102	T	C	0.5808	0.00179342	5.782e-09	-0.0104431			1222882	PTSD
12	rs2292996	103556972	T	C	0.4957	0.00176596	6.002e-09	-0.0102726			1222882	PTSD
9	rs67736073	137956040	T	C	0.1471	0.00271171	6.837e-09	0.0157143			1222882	PTSD
20	rs6032660	44730245	A	G	0.7507	0.00204099	9.225e-09	-0.0117234			1222882	PTSD
1	rs2011374	214101186	A	T	0.505	0.00180033	9.583e-09	-0.0103303			1222882	PTSD
14	rs11628299	42152124	A	G	0.4269	0.00178507	1.14e-08	0.0101892			1222882	PTSD
10	rs7914674	106738675	T	C	0.7889	0.00221088	1.242e-08	0.0125887			1222882	PTSD
13	rs7333625	69588261	A	T	0.9098	0.00308261	1.343e-08	0.0175092			1222882	PTSD
7	rs1358394	115068713	A	G	0.4697	0.00177132	1.662e-08	0.00999731			1222882	PTSD
5	rs4489042	92428154	C	G	0.3817	0.00181746	2.024e-08	-0.0101959			1222882	PTSD
18	rs7243332	26570584	A	G	0.6802	0.00192991	2.258e-08	-0.0107901			1222882	PTSD
13	rs1373273	53973351	A	C	0.5661	0.00178552	2.365e-08	-0.00996857			1222882	PTSD
10	rs1124372	77561513	A	G	0.7197	0.00196552	3.046e-08	0.010887			1222882	PTSD
16	rs1861188	6319505	A	G	0.6833	0.00193983	3.499e-08	-0.0106962			1222882	PTSD
2	rs10191758	144263280	A	G	0.6258	0.0018243	4.079e-08	0.0100099			1222882	PTSD
6	rs180963	101127213	T	C	0.4956	0.00176646	4.557e-08	0.00965901			1222882	PTSD
16	rs7200432	60666399	A	G	0.3064	0.00192158	4.866e-08	0.0104841			1222882	PTSD
2	rs6715366	2327295	G	A	0.723	0.0097	2.492e-08	-0.0540972	53386	77258	127906	SCZ
17	rs2532240	44265839	C	T	0.61	0.0091	2.578e-11	0.0608034	53386	77258	127906	SCZ
1	rs1892346	66331478	T	A	0.428	0.0088	3.557e-08	-0.0484027	53386	77258	127906	SCZ
1	rs56335113	30427639	A	G	0.316	0.0094	6.017e-12	0.064701	53386	77258	127906	SCZ
8	rs1915019	89283689	A	G	0.265	0.0098	6.574e-09	0.0570984	53386	77258	127906	SCZ
3	rs308697	161487491	C	A	0.574	0.0087	8.832e-09	0.0501036	53386	77258	127906	SCZ
12	rs12833624	124476873	C	T	0.646	0.009	2.773e-08	-0.0501992	53386	77258	127906	SCZ
22	rs132582	39988175	C	T	0.471	0.0086	3.259e-09	0.0509973	53386	77258	127906	SCZ
11	rs72943392	81178838	G	C	0.707	0.0096	2.393e-08	-0.0534957	53386	77258	127906	SCZ
3	rs6549963	30044778	T	C	0.596	0.0088	4.308e-08	0.0483043	53386	77258	127906	SCZ
12	rs6538539	95195293	G	T	0.462	0.0086	4.428e-11	0.0567961	53386	77258	127906	SCZ
8	rs10086619	111580570	A	G	0.831	0.0116	4.968e-10	-0.0722052	53386	77258	127906	SCZ
15	rs4702	91426560	G	A	0.461	0.0089	2.794e-21	0.0843044	53386	77258	127906	SCZ
8	rs11136325	144870701	G	A	0.436	0.0091	3.046e-09	0.0537967	53386	77258	127906	SCZ
8	rs4129585	143312933	A	C	0.456	0.0087	5.109e-18	0.0749961	53386	77258	127906	SCZ
12	rs12303743	72259954	G	C	0.898	0.0145	1.59e-09	-0.0874988	53386	77258	127906	SCZ
6	rs217336	84341803	C	A	0.583	0.0087	8.051e-09	0.0503033	53386	77258	127906	SCZ
9	rs3824451	101071522	T	C	0.838	0.0118	2.539e-08	-0.0655951	53386	77258	127906	SCZ
9	rs2381411	36319928	T	C	0.586	0.0088	1.25e-08	-0.050399	53386	77258	127906	SCZ
5	rs11740474	153680747	A	T	0.575	0.0088	1.128e-09	-0.0536962	53386	77258	127906	SCZ
5	rs72802868	152235215	G	T	0.724	0.0096	4.554e-13	0.0691995	53386	77258	127906	SCZ
5	rs12652777	155775075	T	C	0.489	0.0086	1.523e-08	0.0487997	53386	77258	127906	SCZ
16	rs149165	58659307	T	G	0.569	0.0087	3.005e-08	0.0481995	53386	77258	127906	SCZ
8	rs7830315	65608361	T	C	0.478	0.0086	3.082e-08	-0.0478046	53386	77258	127906	SCZ
8	rs6984242	60700469	G	A	0.413	0.0087	3.855e-10	0.0546965	53386	77258	127906	SCZ
4	rs11941714	31202669	G	A	0.673	0.0093	3.073e-08	0.0515957	53386	77258	127906	SCZ
7	rs58120505	2029867	T	C	0.602	0.0088	2.235e-24	0.089603	53386	77258	127906	SCZ
10	rs17731	3821561	G	A	0.62	0.0089	4.37e-09	-0.0523992	53386	77258	127906	SCZ
12	rs4766428	110723245	C	T	0.539	0.0089	3.931e-17	-0.0750038	53386	77258	127906	SCZ
19	rs7251	50162909	C	G	0.682	0.0094	8.292e-12	0.0641009	53386	77258	127906	SCZ
14	rs2999392	51655145	C	T	0.299	0.0094	3.05e-08	-0.0517987	53386	77258	127906	SCZ
4	rs2333321	176859992	A	G	0.218	0.0105	1.248e-11	0.0712038	53386	77258	127906	SCZ
4	rs1427633	167974142	G	C	0.419	0.0088	4.097e-08	0.0483043	53386	77258	127906	SCZ
2	rs3791710	212290048	T	C	0.804	0.0108	3.02e-08	0.0600033	53386	77258	127906	SCZ
7	rs6943762	86403263	T	C	0.883	0.0132	1.569e-15	0.105098	53386	77258	127906	SCZ
7	rs13233308	87244960	C	T	0.526	0.0086	1.749e-08	0.0487044	53386	77258	127906	SCZ
1	rs16851048	177276006	T	C	0.792	0.0107	4.149e-12	-0.0744973	53386	77258	127906	SCZ
11	rs11027839	24389235	A	C	0.488	0.0086	2.398e-09	-0.0515038	53386	77258	127906	SCZ
2	rs778371	233743109	A	G	0.699	0.0095	1.495e-17	-0.0806029	53386	77258	127906	SCZ
15	rs2456020	78868398	C	T	0.773	0.0102	1.125e-15	0.0815984	53386	77258	127906	SCZ
7	rs728055	137072531	T	A	0.658	0.009	8.849e-14	0.0673969	53386	77258	127906	SCZ
7	rs1593304	131619847	A	G	0.193	0.0111	7.448e-09	-0.0641013	53386	77258	127906	SCZ
2	rs11693094	185601420	C	T	0.556	0.0087	4.292e-10	0.054403	53386	77258	127906	SCZ
1	rs12129573	73768366	C	A	0.616	0.0089	2.282e-18	-0.0777994	53386	77258	127906	SCZ
4	rs215412	23423586	G	A	0.661	0.0091	2.692e-10	-0.0577033	53386	77258	127906	SCZ
3	rs7647398	180733150	C	T	0.811	0.0109	1.074e-12	0.0774979	53386	77258	127906	SCZ
3	rs1430894	17868759	C	T	0.506	0.0086	6.154e-10	-0.0532953	53386	77258	127906	SCZ
3	rs12489270	16875823	T	C	0.612	0.0089	7.468e-11	-0.0579046	53386	77258	127906	SCZ
22	rs5751191	42370991	T	C	0.484	0.0086	3.004e-14	-0.0655951	53386	77258	127906	SCZ
2	rs3770754	37575381	C	G	0.645	0.0091	5.352e-09	0.052896	53386	77258	127906	SCZ
20	rs4812325	37485458	G	A	0.37	0.0089	8.96e-16	-0.0719042	53386	77258	127906	SCZ
2	rs13016542	145183851	T	C	0.876	0.0129	8.282e-12	0.0883039	53386	77258	127906	SCZ
9	rs500102	77358745	T	C	0.413	0.0088	4.871e-09	0.0517002	53386	77258	127906	SCZ
9	rs2078266	138378856	A	G	0.178	0.0126	2.941e-08	0.0696007	53386	77258	127906	SCZ
6	rs2815731	73155285	C	A	0.66	0.0091	4.388e-11	0.0600033	53386	77258	127906	SCZ
12	rs10876446	53760710	G	C	0.674	0.0094	1.026e-08	-0.0540022	53386	77258	127906	SCZ
17	rs73292401	12875908	T	A	0.799	0.0109	5.48e-10	-0.0676045	53386	77258	127906	SCZ
17	rs57433322	19141582	C	G	0.885	0.0139	1.992e-09	0.0830996	53386	77258	127906	SCZ
16	rs8055219	13753384	G	A	0.758	0.0101	5.693e-11	-0.0665031	53386	77258	127906	SCZ
5	rs187557	106766340	C	T	0.163	0.0119	2.029e-08	0.0666956	53386	77258	127906	SCZ
5	rs1901512	101723875	T	C	0.318	0.0094	5.723e-10	0.058401	53386	77258	127906	SCZ
12	rs10861176	104631552	G	A	0.257	0.0098	1.588e-08	-0.0555021	53386	77258	127906	SCZ
13	rs2455415	38860697	C	T	0.577	0.0088	1.69e-08	-0.0494949	53386	77258	127906	SCZ
3	rs1604060	117772036	A	G	0.103	0.014	3.241e-08	-0.0772051	53386	77258	127906	SCZ
5	rs10035564	45252500	A	G	0.65	0.0092	4.38e-13	-0.0668024	53386	77258	127906	SCZ
14	rs1540840	99733384	G	C	0.542	0.0093	2.212e-09	0.0556996	53386	77258	127906	SCZ
3	rs17194490	2547786	G	T	0.827	0.0116	1.795e-11	-0.0781994	53386	77258	127906	SCZ
10	rs61857878	92789488	A	T	0.76	0.0102	4.441e-09	0.0600974	53386	77258	127906	SCZ
11	rs2514218	113392994	C	T	0.668	0.0092	1.348e-14	0.0704957	53386	77258	127906	SCZ
2	rs1881046	156835793	G	T	0.67	0.0092	3.392e-08	0.0507026	53386	77258	127906	SCZ
7	rs79210963	24717969	T	C	0.884	0.0137	4.142e-10	-0.0856015	53386	77258	127906	SCZ
11	rs12285419	46343189	C	A	0.8	0.011	1.048e-14	-0.0849045	53386	77258	127906	SCZ
6	rs634940	93077500	G	T	0.737	0.0099	1.784e-11	-0.0663962	53386	77258	127906	SCZ
6	rs117178087	96464060	C	T	0.939	0.0177	4.888e-08	0.0964005	53386	77258	127906	SCZ
18	rs9304548	27500959	C	A	0.261	0.01	1.594e-08	0.0567016	53386	77258	127906	SCZ
3	rs7634476	136398387	A	G	0.397	0.0088	5.462e-11	-0.0577033	53386	77258	127906	SCZ
15	rs4779050	83368738	T	G	0.381	0.0089	7.274e-11	0.0579953	53386	77258	127906	SCZ
1	rs6673880	2373168	A	G	0.492	0.0091	7.195e-12	-0.062301	53386	77258	127906	SCZ
1	rs3795310	8431607	C	T	0.543	0.0087	5.75e-09	0.0509973	53386	77258	127906	SCZ
8	rs4921741	17070926	A	G	0.729	0.0098	1.205e-08	-0.0559991	53386	77258	127906	SCZ
15	rs35351411	61872197	A	C	0.439	0.0087	2.211e-13	-0.0635044	53386	77258	127906	SCZ
14	rs2332700	72417326	C	G	0.258	0.0099	3.875e-14	0.0750982	53386	77258	127906	SCZ
19	rs72986630	11849736	C	T	0.926	0.0179	3.594e-10	-0.112296	53386	77258	127906	SCZ
1	rs12138231	150115398	T	A	0.171	0.0116	7.99e-09	-0.0669949	53386	77258	127906	SCZ
1	rs11587347	239198959	C	G	0.895	0.0147	1.529e-12	-0.103895	53386	77258	127906	SCZ
1	rs145071536	243793012	T	C	0.799	0.012	1.615e-12	-0.0851005	53386	77258	127906	SCZ
10	rs6482437	18726326	A	C	0.0994	0.0142	3.326e-12	-0.0989036	53386	77258	127906	SCZ
5	rs16867571	88743219	A	G	0.778	0.0104	2.676e-10	0.0657035	53386	77258	127906	SCZ
7	rs11534045	110935979	G	A	0.686	0.0093	1.396e-11	0.0627964	53386	77258	127906	SCZ
7	rs1914399	71770973	C	G	0.489	0.0087	1.401e-08	0.0491044	53386	77258	127906	SCZ
5	rs4700418	60621839	C	G	0.489	0.0087	5.366e-16	-0.0701972	53386	77258	127906	SCZ
8	rs73229090	27442127	C	A	0.897	0.0142	4.337e-13	0.102602	53386	77258	127906	SCZ
20	rs113264400	62150128	T	C	0.948	0.0202	2.865e-08	-0.112296	53386	77258	127906	SCZ
2	rs13011472	57961602	C	G	0.498	0.0087	4.282e-16	-0.070401	53386	77258	127906	SCZ
14	rs1953205	30300361	T	A	0.506	0.0089	2.215e-08	-0.0499048	53386	77258	127906	SCZ
14	rs12883788	33303540	C	T	0.527	0.0087	1.862e-12	-0.0613011	53386	77258	127906	SCZ
19	rs2053079	30987423	A	G	0.754	0.0101	3.007e-09	-0.0598986	53386	77258	127906	SCZ
13	rs12877581	74325499	G	C	0.716	0.0099	1.803e-09	-0.0596014	53386	77258	127906	SCZ
2	rs6546857	73837955	A	G	0.757	0.0102	2.744e-09	-0.0603978	53386	77258	127906	SCZ
2	rs17016552	79433742	C	G	0.661	0.0091	1.2e-08	0.0517002	53386	77258	127906	SCZ
1	rs1198588	98552832	A	T	0.194	0.0108	1.731e-21	-0.102598	53386	77258	127906	SCZ
1	rs11165867	97878068	C	T	0.829	0.0116	1.3e-10	-0.0743034	53386	77258	127906	SCZ
15	rs56205728	40567237	G	A	0.7	0.0097	1.007e-10	-0.0630037	53386	77258	127906	SCZ
2	rs62183855	172956449	A	C	0.814	0.0111	2.658e-09	0.0660967	53386	77258	127906	SCZ
8	rs10108980	4191446	C	T	0.785	0.0106	2.725e-09	-0.0628014	53386	77258	127906	SCZ
18	rs11664298	77578986	G	A	0.794	0.0108	8.936e-13	-0.0773995	53386	77258	127906	SCZ
18	rs76838079	77633271	C	T	0.849	0.0138	1.529e-08	-0.0780048	53386	77258	127906	SCZ
11	rs11223774	134247315	A	G	0.301	0.0094	2.739e-08	0.0524976	53386	77258	127906	SCZ
11	rs7112616	130805334	T	C	0.515	0.0086	1.517e-09	0.0522034	53386	77258	127906	SCZ
8	rs79445414	33863561	T	C	0.956	0.0222	2.798e-08	-0.1234	53386	77258	127906	SCZ
22	rs713692	51109735	G	A	0.299	0.0095	2.666e-09	-0.0566021	53238	77025	127906	SCZ
3	rs6798742	63903759	A	G	0.68	0.0093	4.569e-11	-0.0610991	53386	77258	127906	SCZ
9	rs498591	14509105	A	T	0.847	0.0121	2.114e-09	-0.0724954	53386	77258	127906	SCZ
12	rs2238057	2384005	T	G	0.568	0.0087	8.502e-22	-0.0835012	53386	77258	127906	SCZ
2	rs12712510	22749726	T	C	0.488	0.0087	5.144e-11	0.0574006	53386	77258	127906	SCZ
2	rs2909457	162845855	G	A	0.451	0.0087	1.482e-08	0.0489997	53386	77258	127906	SCZ
4	rs35734242	706700	T	C	0.562	0.0089	1.368e-08	-0.050704	53386	77258	127906	SCZ
20	rs6125656	48090779	G	A	0.809	0.0111	6.293e-09	-0.0644959	53386	77258	127906	SCZ
13	rs2504235	28612886	A	G	0.4056	0.0266	2.112e-08	0.149204			14307	TS

## Sheet: 7
IVs associated gwas traits in opengwas in forward MR
SNP	GWAS_Trait	PMID	RS_Number	Position_GRCh37	Alleles	P
rs35896134	White matter microstructure (mean diusivities)	31666681	rs35896134	chr5:82887421	C=0.934, T=0.066	4e-10
rs35896134	White matter microstructure (radial diusivities)	31666681	rs35896134	chr5:82887421	C=0.934, T=0.066	5e-08
rs35896134	White matter microstructure (radial diusivities)	31666681	rs35896134	chr5:82887421	C=0.934, T=0.066	2e-09
rs35896134	White matter microstructure (axial diusivities)	31666681	rs35896134	chr5:82887421	C=0.934, T=0.066	5e-08
rs35896134	White matter microstructure (mean diusivities)	31666681	rs35896134	chr5:82887421	C=0.934, T=0.066	3e-11
rs35896134	White matter microstructure (mean diusivities)	31666681	rs35896134	chr5:82887421	C=0.934, T=0.066	2e-08
rs9112	Brain region volumes	31676860	rs9112	chr5:121518309	A=0.421, G=0.579	1e-09
rs9112	Whole brain free water diffusion (multivariate analysis)	35505052	rs9112	chr5:121518309	A=0.421, G=0.579	2e-10
rs9112	Cortical surface area	34560273	rs9112	chr5:121518309	A=0.421, G=0.579	8e-13
rs9112	Cortical thickness	34560273	rs9112	chr5:121518309	A=0.421, G=0.579	1e-17
rs9112	Vertex-wise cortical surface area	34910505	rs9112	chr5:121518309	A=0.421, G=0.579	3e-13
rs9112	Retinal arteriolar tortuosity	36757925	rs9112	chr5:121518309	A=0.421, G=0.579	7e-11
rs9112	Vertex-wise cortical thickness	34910505	rs9112	chr5:121518309	A=0.421, G=0.579	2e-37
rs9112	Brain morphology (MOSTest)	35164939	rs9112	chr5:121518309	A=0.421, G=0.579	6e-10
rs7898858	White matter microstructure (radial diusivities)	31666681	rs7898858	chr10:18653861	A=0.402, C=0.598	2e-11
rs7898858	White matter microstructure (mean diusivities)	31666681	rs7898858	chr10:18653861	A=0.402, C=0.598	2e-09
rs650724	Non-lobar intracerebral hemorrhage (MTAG)	31430377	rs650724	chr13:110804809	A=0.107, G=0.893	2e-07
rs350823	Eosinophil counts	32888493	rs350823	chr19:4082799	C=0.271, T=0.729	1e-15
rs350823	Mean diameter of LDL particles	38448586	rs350823	chr19:4082799	C=0.271, T=0.729	1e-14
rs7519919	Right-hemisphere salience/ventral attention network to thalamus white-matter structural connectivity	38438384	rs7519919	chr1:165867442	C=0.413, T=0.587	4e-08
rs1044595	Brain region volumes	31676860	rs1044595	chr1:180943529	C=0.426, T=0.574	9e-13
rs1044595	wg rh intensity-contrast lateraloccipital	33875891	rs1044595	chr1:180943529	C=0.426, T=0.574	5e-12
rs1044595	wg lh intensity-contrast precuneus	33875891	rs1044595	chr1:180943529	C=0.426, T=0.574	1e-21
rs1044595	wg lh intensity-contrast lateraloccipital	33875891	rs1044595	chr1:180943529	C=0.426, T=0.574	3e-09
rs1044595	wg rh intensity-contrast superiorparietal	33875891	rs1044595	chr1:180943529	C=0.426, T=0.574	6e-18
rs9842055	Left-hemisphere limbic network to thalamus white-matter structural connectivity	38438384	rs9842055	chr3:190678743	G=0.451, T=0.549	8e-20
rs9842055	Left-hemisphere limbic network to putamen white-matter structural connectivity	38438384	rs9842055	chr3:190678743	G=0.451, T=0.549	6e-14
rs7719289	White matter microstructure (mode of anisotropy)	31666681	rs7719289	chr5:139706525	G=0.774, T=0.226	5e-12
rs10828248	Uterine leiomyoma or ER positive breast cancer (pleiotropy)	35803233	rs10828248	chr10:21824619	A=0.638, G=0.362	5e-21
rs1285847	White matter hyperintensity volume	33293549	rs1285847	chr14:91884655	C=0.477, T=0.523	1e-10
rs1285847	Periventricular white matter hyperintensities	32517579	rs1285847	chr14:91884655	C=0.477, T=0.523	2e-06
rs1285847	Fornix white matter microstructure (isotropic or free water volume fraction)	37236919	rs1285847	chr14:91884655	C=0.477, T=0.523	4e-15
rs1285847	Right-hemisphere salience/ventral attention network to thalamus white-matter structural connectivity	38438384	rs1285847	chr14:91884655	C=0.477, T=0.523	2e-14
rs1285847	Left-hemisphere salience/ventral attention network to thalamus white-matter structural connectivity	38438384	rs1285847	chr14:91884655	C=0.477, T=0.523	6e-20
rs1285847	Left-hemisphere default mode network to thalamus white-matter structural connectivity	38438384	rs1285847	chr14:91884655	C=0.477, T=0.523	1e-25
rs1285847	Left-hemisphere control network to thalamus white-matter structural connectivity	38438384	rs1285847	chr14:91884655	C=0.477, T=0.523	2e-25
rs4843555	Brain morphology (min-P)	32665545	rs4843555	chr16:87231160	C=0.557, T=0.443	4e-24
rs4843555	Subcortical volume (min-P)	32665545	rs4843555	chr16:87231160	C=0.557, T=0.443	3e-24
rs4843555	IDP dMRI ProbtrackX ISOVF cgc l	33875891	rs4843555	chr16:87231160	C=0.557, T=0.443	2e-11
rs4843555	IDP dMRI ProbtrackX OD str l	33875891	rs4843555	chr16:87231160	C=0.557, T=0.443	3e-20
rs4843555	IDP dMRI ProbtrackX OD str r	33875891	rs4843555	chr16:87231160	C=0.557, T=0.443	3e-18
rs4843555	Brain age (difference between predicted and chronological age)	36707530	rs4843555	chr16:87231160	C=0.557, T=0.443	3e-08
rs4843555	Fornix white matter microstructure (diffusion tensor mode)	37236919	rs4843555	chr16:87231160	C=0.557, T=0.443	7e-12
rs4843555	Fornix white matter microstructure (isotropic or free water volume fraction)	37236919	rs4843555	chr16:87231160	C=0.557, T=0.443	3e-11
rs372745970	Cortical thickness	36893272	rs372745970	chr17:44322577	C=0.226, G=0.774	4e-11
rs231592	wg rh intensity-contrast lingual	33875891	rs231592	chr19:36219209	A=0.521, G=0.479	2e-08
rs231592	Cortical thickness	34560273	rs231592	chr19:36219209	A=0.521, G=0.479	9e-14
rs231592	Vertex-wise cortical thickness	34910505	rs231592	chr19:36219209	A=0.521, G=0.479	1e-17
rs34196306	Breast cancer	29059683	rs34196306	chr6:27425644	C=0.063, G=0.937	1e-09
rs34196306	Body size at age 10	32376654	rs34196306	chr6:27425644	C=0.063, G=0.937	2e-18
rs34196306	Childhood body mass index	37280435	rs34196306	chr6:27425644	C=0.063, G=0.937	4e-17
rs1246263	Risk-taking behavior (multivariate analysis)	36324656	rs1246263	chr9:86762039	C=0.297, G=0.703	3e-11
rs2645466	Pulse pressure	27841878	rs2645466	chr17:57853214	A=0.705, C=0.295	3e-08
rs2645466	Pulse pressure	27841878	rs2645466	chr17:57853214	A=0.705, C=0.295	3e-06
rs2645466	Pulse pressure	38689001	rs2645466	chr17:57853214	A=0.705, C=0.295	2e-12
rs2645466	Systolic blood pressure	38689001	rs2645466	chr17:57853214	A=0.705, C=0.295	7e-11
rs1452628	Brain region volumes	31676860	rs1452628	chr1:215139887	A=0.611, T=0.389	1e-11
rs1452628	aparc-a2009s lh thickness S-cingul-Marginalis	33875891	rs1452628	chr1:215139887	A=0.611, T=0.389	3e-09
rs1452628	aparc-a2009s lh thickness S-intrapariet+P-trans	33875891	rs1452628	chr1:215139887	A=0.611, T=0.389	5e-09
rs1452628	Brain shape (segment 1)	33821002	rs1452628	chr1:215139887	A=0.611, T=0.389	2e-10
rs1452628	Whole brain restricted isotropic diffusion (multivariate analysis)	35505052	rs1452628	chr1:215139887	A=0.611, T=0.389	6e-63
rs1452628	Whole brain restricted directional diffusion (multivariate analysis)	35505052	rs1452628	chr1:215139887	A=0.611, T=0.389	2e-73
rs1452628	Whole brain free water diffusion (multivariate analysis)	35505052	rs1452628	chr1:215139887	A=0.611, T=0.389	9e-80
rs1452628	Node-level brain connectivity (multivariate analysis)	36800424	rs1452628	chr1:215139887	A=0.611, T=0.389	4e-11
rs1452628	Cortical surface area	34560273	rs1452628	chr1:215139887	A=0.611, T=0.389	1e-17
rs1452628	Cortical thickness	34560273	rs1452628	chr1:215139887	A=0.611, T=0.389	1e-17
rs1452628	Regional cortical thickness (precuneus)	38890310	rs1452628	chr1:215139887	A=0.611, T=0.389	2e-08
rs1452628	Vertex-wise sulcal depth	34910505	rs1452628	chr1:215139887	A=0.611, T=0.389	9e-35
rs1452628	Vertex-wise cortical surface area	34910505	rs1452628	chr1:215139887	A=0.611, T=0.389	1e-16
rs1452628	Vertex-wise cortical thickness	34910505	rs1452628	chr1:215139887	A=0.611, T=0.389	6e-142
rs1452628	Regional cortical thickness (superiorparietal)	38890310	rs1452628	chr1:215139887	A=0.611, T=0.389	7e-14
rs1452628	Brain morphology (MOSTest)	35164939	rs1452628	chr1:215139887	A=0.611, T=0.389	3e-31
rs1452628	Occipital thickness (unadjusted for global measures)	36893272	rs1452628	chr1:215139887	A=0.611, T=0.389	9e-08
rs1452628	T1 brain MRIs Unsupervised Deep learning derived Imaging Phenotypes (dimension 91)	38580839	rs1452628	chr1:215139887	A=0.611, T=0.389	5e-17
rs1452628	Left-hemisphere somatomotor network to left-hemisphere default mode network white-matter structural connectivity	38438384	rs1452628	chr1:215139887	A=0.611, T=0.389	7e-09
rs1371044	Hematocrit	32888493	rs1371044	chr2:145695907	A=0.211, G=0.789	8e-37
rs1371044	Hemoglobin concentration	32888493	rs1371044	chr2:145695907	A=0.211, G=0.789	5e-35
rs1371044	Brain shape (segment 7)	33821002	rs1371044	chr2:145695907	A=0.211, G=0.789	1e-12
rs1371044	Kidney cancer	38671320	rs1371044	chr2:145695907	A=0.211, G=0.789	1e-09
rs1371044	Orbital telorism	34791242	rs1371044	chr2:145695907	A=0.211, G=0.789	4e-12
rs1371044	Facial morphology (multitrait analysis)	36539420	rs1371044	chr2:145695907	A=0.211, G=0.789	3e-12
rs1371044	Height	36224396	rs1371044	chr2:145695907	A=0.211, G=0.789	1e-34
rs11128657	IDP dMRI TBSS MD Genu of corpus callosum	33875891	rs11128657	chr3:13833084	C=0.42, T=0.58	3e-09
rs11128657	IDP dMRI TBSS MD Cingulum cingulate gyrus L	33875891	rs11128657	chr3:13833084	C=0.42, T=0.58	1e-14
rs11128657	IDP dMRI ProbtrackX MD cgc l	33875891	rs11128657	chr3:13833084	C=0.42, T=0.58	3e-13
rs11128657	IDP dMRI TBSS L3 Cingulum cingulate gyrus R	33875891	rs11128657	chr3:13833084	C=0.42, T=0.58	4e-11
rs11128657	IDP dMRI TBSS L3 Cingulum cingulate gyrus L	33875891	rs11128657	chr3:13833084	C=0.42, T=0.58	2e-09
rs11128657	IDP dMRI ProbtrackX MD fmi	33875891	rs11128657	chr3:13833084	C=0.42, T=0.58	9e-12
rs11128657	IDP dMRI ProbtrackX MD ifo r	33875891	rs11128657	chr3:13833084	C=0.42, T=0.58	4e-09
rs11128657	IDP dMRI ProbtrackX ICVF fmi	33875891	rs11128657	chr3:13833084	C=0.42, T=0.58	2e-09
rs11128657	IDP dMRI ProbtrackX L1 ilf l	33875891	rs11128657	chr3:13833084	C=0.42, T=0.58	7e-09
rs11128657	IDP dMRI ProbtrackX L2 fmi	33875891	rs11128657	chr3:13833084	C=0.42, T=0.58	3e-10
rs11128657	IDP dMRI ProbtrackX L2 slf r	33875891	rs11128657	chr3:13833084	C=0.42, T=0.58	4e-09
rs11128657	IDP dMRI ProbtrackX L3 fmi	33875891	rs11128657	chr3:13833084	C=0.42, T=0.58	4e-10
rs11128657	Whole brain free water diffusion (multivariate analysis)	35505052	rs11128657	chr3:13833084	C=0.42, T=0.58	2e-19
rs11128657	Vertex-wise cortical thickness	34910505	rs11128657	chr3:13833084	C=0.42, T=0.58	6e-09
rs11128657	Regional cortical thickness (fusiform)	38890310	rs11128657	chr3:13833084	C=0.42, T=0.58	6e-10
rs4894803	PR interval	32439900	rs4894803	chr3:171800256	A=0.594, G=0.406	6e-13
rs4894803	PR interval	32439900	rs4894803	chr3:171800256	A=0.594, G=0.406	2e-13
rs4894803	Hypertrophic cardiomyopathy (sarcomere negative)	33495597	rs4894803	chr3:171800256	A=0.594, G=0.406	2e-07
rs4894803	Hypertrophic cardiomyopathy	33495597	rs4894803	chr3:171800256	A=0.594, G=0.406	4e-07
rs4894803	Coronary artery disease	29212778	rs4894803	chr3:171800256	A=0.594, G=0.406	2e-06
rs4894803	Waist-hip ratio	30239722	rs4894803	chr3:171800256	A=0.594, G=0.406	4e-16
rs4894803	Waist-hip ratio	30239722	rs4894803	chr3:171800256	A=0.594, G=0.406	4e-16
rs4894803	Waist-to-hip ratio adjusted for BMI	30239722	rs4894803	chr3:171800256	A=0.594, G=0.406	6e-16
rs4894803	Waist-to-hip ratio adjusted for BMI	31669095	rs4894803	chr3:171800256	A=0.594, G=0.406	4e-13
rs4894803	Electrocardiogram morphology (amplitude at temporal datapoints)	32916098	rs4894803	chr3:171800256	A=0.594, G=0.406	8e-10
rs4894803	Electrocardiogram morphology (amplitude at temporal datapoints)	32916098	rs4894803	chr3:171800256	A=0.594, G=0.406	8e-11
rs4894803	Body fat percentage (adjusted for testosterone and SHBG)	37867527	rs4894803	chr3:171800256	A=0.594, G=0.406	3e-09
rs4862340	IDP dMRI ProbtrackX ISOVF ifo l	33875891	rs4862340	chr4:185124305	A=0.415, G=0.585	1e-15
rs4862340	IDP dMRI ProbtrackX ISOVF ilf l	33875891	rs4862340	chr4:185124305	A=0.415, G=0.585	1e-18
rs4862340	IDP dMRI TBSS ISOVF Superior longitudinal fasciculus R	33875891	rs4862340	chr4:185124305	A=0.415, G=0.585	8e-23
rs4150196	White matter microstructure (fractional anisotropy)	31666681	rs4150196	chr5:139726641	C=0.553, T=0.447	4e-08
rs4150196	Intelligence	29942086	rs4150196	chr5:139726641	C=0.553, T=0.447	3e-08
rs4150196	Intelligence	36378351	rs4150196	chr5:139726641	C=0.553, T=0.447	3e-08
rs151057105	Brain region volumes	31676860	rs151057105	chr7:54944920	C=0.879, T=0.121	8e-17
rs151057105	Brain region volumes	31676860	rs151057105	chr7:54944920	C=0.879, T=0.121	4e-16
rs151057105	Brain morphology (MOSTest)	32665545	rs151057105	chr7:54944920	C=0.879, T=0.121	3e-30
rs151057105	aseg rh volume VentralDC	33875891	rs151057105	chr7:54944920	C=0.879, T=0.121	9e-15
rs151057105	aseg lh volume VentralDC	33875891	rs151057105	chr7:54944920	C=0.879, T=0.121	6e-17
rs151057105	Corpus callosum volume (MOSTest)	37164063	rs151057105	chr7:54944920	C=0.879, T=0.121	3e-11
rs2488002	White matter microstructure (mean diusivities)	31666681	rs2488002	chr10:105679341	C=0.155, T=0.845	2e-09
rs2488002	White matter microstructure (radial diusivities)	31666681	rs2488002	chr10:105679341	C=0.155, T=0.845	3e-09
rs2488002	White matter microstructure (axial diusivities)	31666681	rs2488002	chr10:105679341	C=0.155, T=0.845	1e-08
rs2488002	White matter microstructure (mean diusivities)	31666681	rs2488002	chr10:105679341	C=0.155, T=0.845	1e-09
rs2488002	White matter microstructure (radial diusivities)	31666681	rs2488002	chr10:105679341	C=0.155, T=0.845	1e-08
rs2488002	White matter microstructure (mean diusivities)	31666681	rs2488002	chr10:105679341	C=0.155, T=0.845	1e-08
rs7935166	White matter microstructure (axial diusivities)	31666681	rs7935166	chr11:44636547	A=0.132, G=0.868	3e-13
rs7935166	White matter microstructure (radial diusivities)	31666681	rs7935166	chr11:44636547	A=0.132, G=0.868	7e-10
rs7935166	White matter microstructure (mean diusivities)	31666681	rs7935166	chr11:44636547	A=0.132, G=0.868	5e-16
rs7935166	White matter microstructure (axial diusivities)	31666681	rs7935166	chr11:44636547	A=0.132, G=0.868	1e-09
rs7935166	White matter microstructure (axial diusivities)	31666681	rs7935166	chr11:44636547	A=0.132, G=0.868	4e-12
rs7935166	White matter microstructure (mean diusivities)	31666681	rs7935166	chr11:44636547	A=0.132, G=0.868	2e-10
rs7935166	White matter microstructure (mean diusivities)	31666681	rs7935166	chr11:44636547	A=0.132, G=0.868	4e-10
rs7935166	IDP dMRI TBSS L1 Cingulum hippocampus L	33875891	rs7935166	chr11:44636547	A=0.132, G=0.868	3e-11
rs7935166	IDP dMRI ProbtrackX ICVF unc r	33875891	rs7935166	chr11:44636547	A=0.132, G=0.868	7e-14
rs7935166	White matter microstructure (mean diusivities)	31666681	rs7935166	chr11:44636547	A=0.132, G=0.868	1e-10
rs7935166	White matter microstructure (mean diusivities)	31666681	rs7935166	chr11:44636547	A=0.132, G=0.868	3e-11
rs7935166	Whole brain free water diffusion (multivariate analysis)	35505052	rs7935166	chr11:44636547	A=0.132, G=0.868	2e-21
rs7935166	Node-level brain connectivity (multivariate analysis)	36800424	rs7935166	chr11:44636547	A=0.132, G=0.868	1e-08
rs7935166	DTI autoptx FA fmi tract	38811844	rs7935166	chr11:44636547	A=0.132, G=0.868	2e-08
rs7935166	DTI autoptx L3 unc l tract	38811844	rs7935166	chr11:44636547	A=0.132, G=0.868	1e-08
rs7935166	DTI TBSS L2 Superior fronto-occipital fasciculus R	38811844	rs7935166	chr11:44636547	A=0.132, G=0.868	1e-10
rs7297175	Lifetime smoking index	31689377	rs7297175	chr12:56473808	C=0.588, T=0.412	7e-09
rs7297175	COVID-19 hospitalization or rheumatoid arthritis (MTAG)	36762574	rs7297175	chr12:56473808	C=0.588, T=0.412	3e-12
rs7297175	Intelligence	36378351	rs7297175	chr12:56473808	C=0.588, T=0.412	2e-10
rs7297175	Orbitofrontal area (unadjusted for global measures)	36893272	rs7297175	chr12:56473808	C=0.588, T=0.412	3e-20
rs7297175	Cortical surface area	36893272	rs7297175	chr12:56473808	C=0.588, T=0.412	2e-18
rs7297175	Dorsolateral prefrontal area (unadjusted for global measures)	36893272	rs7297175	chr12:56473808	C=0.588, T=0.412	3e-20
rs7297175	Dorsomedial frontal area (unadjusted for global measures)	36893272	rs7297175	chr12:56473808	C=0.588, T=0.412	2e-18
rs7297175	Superior parietal area (unadjusted for global measures)	36893272	rs7297175	chr12:56473808	C=0.588, T=0.412	5e-11
rs1948948	White matter microstructure (axial diusivities)	31666681	rs1948948	chr16:51442679	C=0.56, T=0.44	4e-08
rs1948948	White matter hyperintensity volume x hypertension interaction (2df)	33293549	rs1948948	chr16:51442679	C=0.56, T=0.44	7e-09
rs1948948	White matter hyperintensity volume x hypertension interaction (2df)	33293549	rs1948948	chr16:51442679	C=0.56, T=0.44	7e-10
rs1948948	White matter hyperintensity volume (adjusted for hypertension)	33293549	rs1948948	chr16:51442679	C=0.56, T=0.44	2e-10
rs1948948	White matter hyperintensity volume (adjusted for hypertension)	33293549	rs1948948	chr16:51442679	C=0.56, T=0.44	2e-09
rs1948948	White matter hyperintensity volume	33293549	rs1948948	chr16:51442679	C=0.56, T=0.44	1e-10
rs1948948	White matter hyperintensity volume	33293549	rs1948948	chr16:51442679	C=0.56, T=0.44	2e-09
rs1948948	Brain morphology (min-P)	32665545	rs1948948	chr16:51442679	C=0.56, T=0.44	3e-11
rs1948948	IDP T2 FLAIR BIANCA WMH volume	33875891	rs1948948	chr16:51442679	C=0.56, T=0.44	1e-09
rs1948948	IDP dMRI TBSS ISOVF Anterior corona radiata R	33875891	rs1948948	chr16:51442679	C=0.56, T=0.44	1e-11
rs1948948	IDP dMRI TBSS ISOVF Sagittal stratum R	33875891	rs1948948	chr16:51442679	C=0.56, T=0.44	3e-17
rs1948948	IDP dMRI ProbtrackX ISOVF ar r	33875891	rs1948948	chr16:51442679	C=0.56, T=0.44	2e-11
rs1948948	Cortical thickness (min-P)	32665545	rs1948948	chr16:51442679	C=0.56, T=0.44	1e-11
rs1948948	Whole brain restricted isotropic diffusion (multivariate analysis)	35505052	rs1948948	chr16:51442679	C=0.56, T=0.44	3e-21
rs1948948	Whole brain free water diffusion (multivariate analysis)	35505052	rs1948948	chr16:51442679	C=0.56, T=0.44	8e-62
rs1948948	White matter hyperintensities	38890310	rs1948948	chr16:51442679	C=0.56, T=0.44	3e-11
rs1948948	Brain morphology (MOSTest)	35164939	rs1948948	chr16:51442679	C=0.56, T=0.44	2e-19
rs1948948	T1 brain MRIs Unsupervised Deep learning derived Imaging Phenotypes (dimension 121)	38580839	rs1948948	chr16:51442679	C=0.56, T=0.44	5e-12
rs4790877	Serum total protein levels	34594039	rs4790877	chr17:1995254	A=0.614, G=0.386	2e-39
rs769449	HDL cholesterol levels	26690388	rs769449	chr19:45410002	A=0.123, G=0.877	4e-10
rs769449	Cognitive decline (age-related)	24468470	rs769449	chr19:45410002	A=0.123, G=0.877	5e-19
rs769449	Alzheimer's disease biomarkers	23562540	rs769449	chr19:45410002	A=0.123, G=0.877	2e-16
rs769449	Alzheimer's disease biomarkers	23562540	rs769449	chr19:45410002	A=0.123, G=0.877	2e-18
rs769449	C-reactive protein	18439548	rs769449	chr19:45410002	A=0.123, G=0.877	9e-21
rs769449	Serum metabolite levels (CMS)	31636271	rs769449	chr19:45410002	A=0.123, G=0.877	3e-11
rs769449	LDL cholesterol levels x short total sleep time interaction (2df test)	31719535	rs769449	chr19:45410002	A=0.123, G=0.877	1e-97
rs769449	Parental longevity (combined parental age at death)	27015805	rs769449	chr19:45410002	A=0.123, G=0.877	2e-07
rs769449	High density lipoprotein cholesterol levels	29507422	rs769449	chr19:45410002	A=0.123, G=0.877	1e-47
rs769449	High density lipoprotein cholesterol levels	29507422	rs769449	chr19:45410002	A=0.123, G=0.877	4e-52
rs769449	Cerebrospinal fluid AB1-42 levels	28247064	rs769449	chr19:45410002	A=0.123, G=0.877	5e-94
rs769449	Cerebrospinal P-tau181p levels	28247064	rs769449	chr19:45410002	A=0.123, G=0.877	5e-33
rs769449	Cerebrospinal T-tau levels	28247064	rs769449	chr19:45410002	A=0.123, G=0.877	4e-29
rs769449	Low density lipoprotein cholesterol levels	29507422	rs769449	chr19:45410002	A=0.123, G=0.877	5e-136
rs769449	Low density lipoprotein cholesterol levels	29507422	rs769449	chr19:45410002	A=0.123, G=0.877	5e-14
rs769449	Low density lipoprotein cholesterol levels	29507422	rs769449	chr19:45410002	A=0.123, G=0.877	7e-09
rs769449	Low density lipoprotein cholesterol levels	29507422	rs769449	chr19:45410002	A=0.123, G=0.877	3e-157
rs769449	Cerebrospinal fluid t-tau levels	28641921	rs769449	chr19:45410002	A=0.123, G=0.877	8e-11
rs769449	Cerebrospinal fluid AB1-42 levels	28641921	rs769449	chr19:45410002	A=0.123, G=0.877	2e-30
rs769449	Cerebrospinal fluid t-tau:AB1-42 ratio	28641921	rs769449	chr19:45410002	A=0.123, G=0.877	6e-22
rs769449	Verbal memory performance (residualized delayed recall level)	28800603	rs769449	chr19:45410002	A=0.123, G=0.877	3e-12
rs769449	Cingulate cortical amyloid beta load	26421299	rs769449	chr19:45410002	A=0.123, G=0.877	5e-17
rs769449	Triglycerides	29507422	rs769449	chr19:45410002	A=0.123, G=0.877	5e-23
rs769449	Triglycerides	29507422	rs769449	chr19:45410002	A=0.123, G=0.877	8e-29
rs769449	Cerebrospinal fluid AB1-42 levels	30319691	rs769449	chr19:45410002	A=0.123, G=0.877	1e-18
rs769449	Cerebrospinal fluid t-tau:AB1-42 ratio	30319691	rs769449	chr19:45410002	A=0.123, G=0.877	4e-26
rs769449	Cerebrospinal fluid p-Tau181p:AB1-42 ratio	30319691	rs769449	chr19:45410002	A=0.123, G=0.877	6e-24
rs769449	Cognitive impairment test score	30319691	rs769449	chr19:45410002	A=0.123, G=0.877	2e-14
rs769449	Triglyceride levels	31217584	rs769449	chr19:45410002	A=0.123, G=0.877	6e-08
rs769449	Low density lipoprotein cholesterol levels	31217584	rs769449	chr19:45410002	A=0.123, G=0.877	3e-22
rs769449	High density lipoprotein cholesterol levels	31217584	rs769449	chr19:45410002	A=0.123, G=0.877	1e-06
rs769449	C-reactive protein levels	31217584	rs769449	chr19:45410002	A=0.123, G=0.877	3e-52
rs769449	Cerebrospinal fluid biomarker levels	28031287	rs769449	chr19:45410002	A=0.123, G=0.877	2e-09
rs769449	Total cholesterol levels	29507422	rs769449	chr19:45410002	A=0.123, G=0.877	5e-95
rs769449	Total cholesterol levels	29507422	rs769449	chr19:45410002	A=0.123, G=0.877	7e-12
rs769449	Total cholesterol levels	29507422	rs769449	chr19:45410002	A=0.123, G=0.877	3e-09
rs769449	Total cholesterol levels	29507422	rs769449	chr19:45410002	A=0.123, G=0.877	2e-114
rs769449	Creatinine levels	33462484	rs769449	chr19:45410002	A=0.123, G=0.877	5e-23
rs769449	Cystatin C levels	33462484	rs769449	chr19:45410002	A=0.123, G=0.877	6e-18
rs769449	Total cholesterol levels	33462484	rs769449	chr19:45410002	A=0.123, G=0.877	0
rs769449	Estimated glomerular filtration rate	33462484	rs769449	chr19:45410002	A=0.123, G=0.877	1e-22
rs769449	High density lipoprotein cholesterol levels	33462484	rs769449	chr19:45410002	A=0.123, G=0.877	4e-114
rs769449	Direct bilirubin levels	33462484	rs769449	chr19:45410002	A=0.123, G=0.877	8e-12
rs769449	Glycated hemoglobin levels	33462484	rs769449	chr19:45410002	A=0.123, G=0.877	5e-10
rs769449	Gamma glutamyl transferase levels	33462484	rs769449	chr19:45410002	A=0.123, G=0.877	5e-10
rs769449	Apolipoprotein B levels	33462484	rs769449	chr19:45410002	A=0.123, G=0.877	0
rs769449	Aspartate aminotransferase to alanine aminotransferase ratio	33462484	rs769449	chr19:45410002	A=0.123, G=0.877	9e-73
rs769449	C-reactive protein levels	33462484	rs769449	chr19:45410002	A=0.123, G=0.877	0
rs769449	Serum alkaline phosphatase levels	33462484	rs769449	chr19:45410002	A=0.123, G=0.877	1e-18
rs769449	Apolipoprotein A1 levels	33462484	rs769449	chr19:45410002	A=0.123, G=0.877	4e-191
rs769449	Alanine aminotransferase levels	33462484	rs769449	chr19:45410002	A=0.123, G=0.877	9e-39
rs769449	Urea levels	33462484	rs769449	chr19:45410002	A=0.123, G=0.877	8e-11
rs769449	Plasma p-tau181 levels	35250029	rs769449	chr19:45410002	A=0.123, G=0.877	6e-08
rs769449	Plasma p-tau181 levels in non-dementia individuals	35250029	rs769449	chr19:45410002	A=0.123, G=0.877	5e-07
rs769449	Parental longevity (father's age at death or father's attained age)	31484785	rs769449	chr19:45410002	A=0.123, G=0.877	2e-20
rs769449	Longevity	31484785	rs769449	chr19:45410002	A=0.123, G=0.877	6e-74
rs769449	Fasting 3-hydroxybutyrate	34610981	rs769449	chr19:45410002	A=0.123, G=0.877	7e-09
rs769449	Postprandial 3-hydroxybutyrate	34610981	rs769449	chr19:45410002	A=0.123, G=0.877	4e-11
rs769449	Fasting omega-3 fatty acids	34610981	rs769449	chr19:45410002	A=0.123, G=0.877	1e-08
rs769449	Cerebral microbleeds	32913026	rs769449	chr19:45410002	A=0.123, G=0.877	3e-10
rs769449	Cerebral microbleeds (lobar)	32913026	rs769449	chr19:45410002	A=0.123, G=0.877	4e-07
rs769449	Alzheimer's disease	30636644	rs769449	chr19:45410002	A=0.123, G=0.877	7e-30
rs769449	Alzheimer's disease	30636644	rs769449	chr19:45410002	A=0.123, G=0.877	2e-83
rs769449	Alzheimer's disease	30636644	rs769449	chr19:45410002	A=0.123, G=0.877	6e-47
rs769449	Low density lipoprotein cholesterol levels	32226016	rs769449	chr19:45410002	A=0.123, G=0.877	3e-22
rs769449	Triglyceride levels	33462484	rs769449	chr19:45410002	A=0.123, G=0.877	1e-60
rs769449	Low density lipoprotein cholesterol levels	33462484	rs769449	chr19:45410002	A=0.123, G=0.877	0
rs769449	Total cholesterol levels	31217584	rs769449	chr19:45410002	A=0.123, G=0.877	5e-19
rs769449	Lateral ventricle volume change rate x age interaction (2df)	35383335	rs769449	chr19:45410002	A=0.123, G=0.877	3e-06
rs769449	C-reactive protein levels	29878111	rs769449	chr19:45410002	A=0.123, G=0.877	3e-38
rs769449	Cerebral amyloid deposition (PET imaging)	30361487	rs769449	chr19:45410002	A=0.123, G=0.877	6e-20
rs769449	Dementia with Lewy bodies	33589841	rs769449	chr19:45410002	A=0.123, G=0.877	3e-101
rs769449	High density lipoprotein cholesterol levels	34887591	rs769449	chr19:45410002	A=0.123, G=0.877	4e-15
rs769449	Pulse pressure	38689001	rs769449	chr19:45410002	A=0.123, G=0.877	3e-07
rs769449	Mini-mental state examination / Folstein test (24 month visit)	35086473	rs769449	chr19:45410002	A=0.123, G=0.877	2e-19
rs769449	Fluorodeoxyglucose (PET imaging) (24 month visit)	35086473	rs769449	chr19:45410002	A=0.123, G=0.877	1e-13
rs769449	Entorhinal cortical volume (24 month visit)	35086473	rs769449	chr19:45410002	A=0.123, G=0.877	3e-17
rs769449	Fusiform volume (24 month visit)	35086473	rs769449	chr19:45410002	A=0.123, G=0.877	6e-09
rs769449	Hippocampal volume (24 month visit)	35086473	rs769449	chr19:45410002	A=0.123, G=0.877	6e-19
rs769449	Hippocampal volume (12 month visit)	35086473	rs769449	chr19:45410002	A=0.123, G=0.877	3e-19
rs769449	Middle temporal gyrus volume (baseline)	35086473	rs769449	chr19:45410002	A=0.123, G=0.877	9e-09
rs769449	Fusiform volume (baseline)	35086473	rs769449	chr19:45410002	A=0.123, G=0.877	8e-07
rs769449	Hippocampal volume (baseline)	35086473	rs769449	chr19:45410002	A=0.123, G=0.877	9e-24
rs769449	Rey auditory verbal learning test (baseline)	35086473	rs769449	chr19:45410002	A=0.123, G=0.877	6e-19
rs769449	Fluorodeoxyglucose (PET imaging) (baseline)	35086473	rs769449	chr19:45410002	A=0.123, G=0.877	3e-17
rs769449	Entorhinal cortical volume (6 month visit)	35086473	rs769449	chr19:45410002	A=0.123, G=0.877	1e-18
rs769449	Middle temporal gyrus volume (6 month visit)	35086473	rs769449	chr19:45410002	A=0.123, G=0.877	3e-10
rs769449	Hippocampal volume (6 month visit)	35086473	rs769449	chr19:45410002	A=0.123, G=0.877	5e-27
rs769449	Triacylglyceride levels	35945198	rs769449	chr19:45410002	A=0.123, G=0.877	3e-10
rs769449	Total cholesterol levels	35945198	rs769449	chr19:45410002	A=0.123, G=0.877	4e-14
rs769449	HDL cholesterol levels	35945198	rs769449	chr19:45410002	A=0.123, G=0.877	7e-18
rs769449	LDL cholesterol levels	35945198	rs769449	chr19:45410002	A=0.123, G=0.877	1e-17
rs769449	Cholesterol levels	35050183	rs769449	chr19:45410002	A=0.123, G=0.877	4e-14
rs769449	Body mass index	36581621	rs769449	chr19:45410002	A=0.123, G=0.877	2e-49
rs769449	Multi-trait sex score	37277458	rs769449	chr19:45410002	A=0.123, G=0.877	5e-12
rs769449	Diastolic blood pressure	33230300	rs769449	chr19:45410002	A=0.123, G=0.877	5e-11
rs769449	Diastolic blood pressure	33230300	rs769449	chr19:45410002	A=0.123, G=0.877	3e-10
rs769449	Amyloid beta 1-42 levels	37539664	rs769449	chr19:45410002	A=0.123, G=0.877	1e-107
rs769449	Cerebrospinal fluid p-tau levels	37539664	rs769449	chr19:45410002	A=0.123, G=0.877	9e-34
rs769449	Cerebrospinal fluid t-tau levels	37539664	rs769449	chr19:45410002	A=0.123, G=0.877	2e-30
rs3795736	BCAN/CD200 protein level ratio	38412862	rs3795736	chr1:156612932	C=0.29, T=0.71	9e-144
rs3795736	BCAN/DPP6 protein level ratio	38412862	rs3795736	chr1:156612932	C=0.29, T=0.71	5e-148
rs3795736	BCAN/KLK6 protein level ratio	38412862	rs3795736	chr1:156612932	C=0.29, T=0.71	1e-129
rs3795736	BCAN/MOG protein level ratio	38412862	rs3795736	chr1:156612932	C=0.29, T=0.71	2e-132
rs3795736	BCAN/NPTXR protein level ratio	38412862	rs3795736	chr1:156612932	C=0.29, T=0.71	3e-155
rs2412397	IDP dMRI TBSS MD Cingulum cingulate gyrus R	33875891	rs2412397	chr4:54109623	C=0.322, T=0.678	2e-08
rs2412397	IDP dMRI ProbtrackX MD ifo l	33875891	rs2412397	chr4:54109623	C=0.322, T=0.678	1e-08
rs2412397	IDP dMRI TBSS ICVF Superior longitudinal fasciculus L	33875891	rs2412397	chr4:54109623	C=0.322, T=0.678	5e-13
rs2412397	IDP dMRI TBSS ICVF Cingulum cingulate gyrus R	33875891	rs2412397	chr4:54109623	C=0.322, T=0.678	5e-12
rs2412397	IDP dMRI TBSS MD Superior longitudinal fasciculus L	33875891	rs2412397	chr4:54109623	C=0.322, T=0.678	1e-08
rs2412397	IDP dMRI ProbtrackX L2 fmi	33875891	rs2412397	chr4:54109623	C=0.322, T=0.678	2e-08
rs2412397	IDP dMRI ProbtrackX L2 ifo l	33875891	rs2412397	chr4:54109623	C=0.322, T=0.678	9e-09
rs2412397	IDP dMRI ProbtrackX L3 fmi	33875891	rs2412397	chr4:54109623	C=0.322, T=0.678	7e-09
rs2412397	IDP dMRI ProbtrackX L3 ifo l	33875891	rs2412397	chr4:54109623	C=0.322, T=0.678	4e-09
rs2412397	IDP dMRI ProbtrackX L3 ilf r	33875891	rs2412397	chr4:54109623	C=0.322, T=0.678	3e-08
rs3129787	White matter microstructure (mean diusivities)	31666681	rs3129787	chr6:29048689	A=0.779, T=0.221	2e-12
rs3129787	White matter microstructure (mean diusivities)	31666681	rs3129787	chr6:29048689	A=0.779, T=0.221	5e-12
rs3129787	White matter microstructure (fractional anisotropy)	31666681	rs3129787	chr6:29048689	A=0.779, T=0.221	3e-09
rs3129787	White matter microstructure (radial diusivities)	31666681	rs3129787	chr6:29048689	A=0.779, T=0.221	6e-11
rs3129787	White matter microstructure (mean diusivities)	31666681	rs3129787	chr6:29048689	A=0.779, T=0.221	5e-09
rs3129787	White matter microstructure (axial diusivities)	31666681	rs3129787	chr6:29048689	A=0.779, T=0.221	5e-08
rs3129787	White matter microstructure (radial diusivities)	31666681	rs3129787	chr6:29048689	A=0.779, T=0.221	3e-08
rs3129787	White matter microstructure (radial diusivities)	31666681	rs3129787	chr6:29048689	A=0.779, T=0.221	4e-11
rs3129787	IDP dMRI ProbtrackX ICVF ptr l	33875891	rs3129787	chr6:29048689	A=0.779, T=0.221	1e-08
rs3129787	White matter microstructure (mean diusivities)	31666681	rs3129787	chr6:29048689	A=0.779, T=0.221	2e-08
rs3129787	White matter fractional anisotropy x age interaction (2df)	34358307	rs3129787	chr6:29048689	A=0.779, T=0.221	4e-12
rs1693571	Whole brain restricted isotropic diffusion (multivariate analysis)	35505052	rs1693571	chr8:101678349	A=0.533, T=0.467	6e-29
rs1693571	Node-level brain connectivity (multivariate analysis)	36800424	rs1693571	chr8:101678349	A=0.533, T=0.467	3e-09
rs11557085	Superior temporal area (unadjusted for global measures)	36893272	rs11557085	chr8:145752900	C=0.543, T=0.457	5e-08
rs28361101	IDP dMRI TBSS MD Superior longitudinal fasciculus R	33875891	rs28361101	chr9:111775756	C=0.027, G=0.973	3e-08
rs28361101	White matter mean diffusivity x age interaction (2df)	34358307	rs28361101	chr9:111775756	C=0.027, G=0.973	8e-10
rs911547	White matter microstructure (radial diusivities)	31666681	rs911547	chr10:105639421	A=0.844, G=0.156	2e-08
rs911547	Mean corpuscular hemoglobin	32888494	rs911547	chr10:105639421	A=0.844, G=0.156	1e-18
rs911547	Mean corpuscular volume	32888494	rs911547	chr10:105639421	A=0.844, G=0.156	2e-21
rs911547	Platelet count	32888493	rs911547	chr10:105639421	A=0.844, G=0.156	4e-15
rs911547	Mean spheric corpuscular volume	32888494	rs911547	chr10:105639421	A=0.844, G=0.156	5e-22
rs911547	Mean reticulocyte volume	32888494	rs911547	chr10:105639421	A=0.844, G=0.156	9e-22
rs911547	Diastolic blood pressure	35762941	rs911547	chr10:105639421	A=0.844, G=0.156	4e-10
rs911547	Corpus callosum fractional anisotropy (splenium)	37164063	rs911547	chr10:105639421	A=0.844, G=0.156	9e-09
rs199501	IDP dMRI ProbtrackX L1 atr r	33875891	rs199501	chr17:44862613	A=0.252, G=0.748	6e-12
rs199501	IDP dMRI TBSS L3 Superior fronto-occipital fasciculus R	33875891	rs199501	chr17:44862613	A=0.252, G=0.748	1e-12
rs199501	Aspartate aminotransferase levels	33462484	rs199501	chr17:44862613	A=0.252, G=0.748	1e-12
rs199501	Serum albumin levels	33462484	rs199501	chr17:44862613	A=0.252, G=0.748	2e-13
rs199501	Serum alkaline phosphatase levels	33462484	rs199501	chr17:44862613	A=0.252, G=0.748	1e-11
rs199501	Parkinson's disease	34064523	rs199501	chr17:44862613	A=0.252, G=0.748	8e-12
rs199501	Non-albumin protein levels	33462484	rs199501	chr17:44862613	A=0.252, G=0.748	3e-10
rs199501	Serum total protein levels	33462484	rs199501	chr17:44862613	A=0.252, G=0.748	6e-24
rs199501	Serum phosphate levels	33462484	rs199501	chr17:44862613	A=0.252, G=0.748	1e-18
rs199501	White matter mean diffusivity x age interaction (2df)	34358307	rs199501	chr17:44862613	A=0.252, G=0.748	8e-16
rs199501	Corpus callosum fractional anisotropy (body)	37164063	rs199501	chr17:44862613	A=0.252, G=0.748	5e-11
rs199501	Corpus callosum fractional anisotropy (MOSTest)	37164063	rs199501	chr17:44862613	A=0.252, G=0.748	2e-17
rs6062264	Brain region volumes	31676860	rs6062264	chr20:61154871	C=0.728, T=0.272	1e-09
rs6062264	Brain region volumes	31676860	rs6062264	chr20:61154871	C=0.728, T=0.272	9e-15
rs6062264	White matter integrity (fractional anisotropy)	32358547	rs6062264	chr20:61154871	C=0.728, T=0.272	1e-08
rs6062264	Subcortical volume (min-P)	32665545	rs6062264	chr20:61154871	C=0.728, T=0.272	8e-12
rs6062264	Brain morphology (min-P)	32665545	rs6062264	chr20:61154871	C=0.728, T=0.272	2e-11
rs6062264	IDP dMRI TBSS FA Superior cerebellar peduncle L	33875891	rs6062264	chr20:61154871	C=0.728, T=0.272	3e-23
rs6062264	ThalamNuclei lh volume Pf	33875891	rs6062264	chr20:61154871	C=0.728, T=0.272	3e-14
rs6062264	IDP dMRI ProbtrackX ICVF ml l	33875891	rs6062264	chr20:61154871	C=0.728, T=0.272	7e-11
rs6062264	ThalamNuclei lh volume CM	33875891	rs6062264	chr20:61154871	C=0.728, T=0.272	8e-15
rs6062264	IDP dMRI TBSS L2 Superior cerebellar peduncle L	33875891	rs6062264	chr20:61154871	C=0.728, T=0.272	3e-21
rs6062264	Subcortical volume (MOSTest)	32665545	rs6062264	chr20:61154871	C=0.728, T=0.272	4e-14
rs6062264	Corpus callosum fractional anisotropy (body)	37164063	rs6062264	chr20:61154871	C=0.728, T=0.272	8e-09
rs6062264	Corpus callosum fractional anisotropy (MOSTest)	37164063	rs6062264	chr20:61154871	C=0.728, T=0.272	1e-09
rs6062264	Right-hemisphere somatomotor network to amygdala white-matter structural connectivity	38438384	rs6062264	chr20:61154871	C=0.728, T=0.272	6e-09
rs6062264	DTI TBSS FA Superior cerebellar peduncle L	38811844	rs6062264	chr20:61154871	C=0.728, T=0.272	2e-06
rs6062264	Left-hemisphere visual network to left-hemisphere visual network white-matter structural connectivity	38438384	rs6062264	chr20:61154871	C=0.728, T=0.272	1e-08
rs6062264	Right-hemisphere visual network to right-hemisphere visual network white-matter structural connectivity	38438384	rs6062264	chr20:61154871	C=0.728, T=0.272	2e-10
rs2267161	White matter microstructure (mean diusivities)	31666681	rs2267161	chr22:30953295	C=0.674, T=0.326	4e-08
rs2267161	White matter microstructure (mean diusivities)	31666681	rs2267161	chr22:30953295	C=0.674, T=0.326	5e-08
rs2267161	White matter microstructure (mean diusivities)	31666681	rs2267161	chr22:30953295	C=0.674, T=0.326	1e-09
rs2267161	White matter microstructure (mean diusivities)	31666681	rs2267161	chr22:30953295	C=0.674, T=0.326	9e-10
rs2267161	White matter microstructure (mean diusivities)	31666681	rs2267161	chr22:30953295	C=0.674, T=0.326	1e-10
rs2267161	White matter microstructure (mean diusivities)	31666681	rs2267161	chr22:30953295	C=0.674, T=0.326	8e-09
rs2267161	White matter microstructure (radial diusivities)	31666681	rs2267161	chr22:30953295	C=0.674, T=0.326	2e-08
rs2267161	White matter microstructure (radial diusivities)	31666681	rs2267161	chr22:30953295	C=0.674, T=0.326	5e-10
rs2267161	White matter microstructure (radial diusivities)	31666681	rs2267161	chr22:30953295	C=0.674, T=0.326	6e-10
rs2267161	White matter microstructure (radial diusivities)	31666681	rs2267161	chr22:30953295	C=0.674, T=0.326	4e-09
rs2267161	White matter microstructure (fractional anisotropy)	31666681	rs2267161	chr22:30953295	C=0.674, T=0.326	5e-13
rs2267161	White matter microstructure (radial diusivities)	31666681	rs2267161	chr22:30953295	C=0.674, T=0.326	4e-13
rs2267161	White matter microstructure (fractional anisotropy)	31666681	rs2267161	chr22:30953295	C=0.674, T=0.326	3e-10
rs2267161	Brain morphology (MOSTest)	32665545	rs2267161	chr22:30953295	C=0.674, T=0.326	3e-09
rs2267161	wg rh intensity-contrast middletemporal	33875891	rs2267161	chr22:30953295	C=0.674, T=0.326	7e-14
rs2267161	wg rh intensity-contrast inferiortemporal	33875891	rs2267161	chr22:30953295	C=0.674, T=0.326	2e-14
rs2267161	wg rh intensity-contrast lateraloccipital	33875891	rs2267161	chr22:30953295	C=0.674, T=0.326	9e-15
rs2267161	wg lh intensity-contrast rostralmiddlefrontal	33875891	rs2267161	chr22:30953295	C=0.674, T=0.326	3e-09
rs2267161	wg rh intensity-contrast fusiform	33875891	rs2267161	chr22:30953295	C=0.674, T=0.326	2e-11
rs2267161	wg rh intensity-contrast inferiorparietal	33875891	rs2267161	chr22:30953295	C=0.674, T=0.326	8e-14
rs2267161	wg rh intensity-contrast bankssts	33875891	rs2267161	chr22:30953295	C=0.674, T=0.326	1e-10
rs2267161	wg rh intensity-contrast caudalmiddlefrontal	33875891	rs2267161	chr22:30953295	C=0.674, T=0.326	5e-09
rs2267161	wg lh intensity-contrast superiorparietal	33875891	rs2267161	chr22:30953295	C=0.674, T=0.326	6e-12
rs2267161	wg lh intensity-contrast superiortemporal	33875891	rs2267161	chr22:30953295	C=0.674, T=0.326	1e-09
rs2267161	wg lh intensity-contrast supramarginal	33875891	rs2267161	chr22:30953295	C=0.674, T=0.326	3e-13
rs2267161	IDP T1 FAST ROIs R putamen	33875891	rs2267161	chr22:30953295	C=0.674, T=0.326	8e-11
rs2267161	IDP dMRI TBSS FA Splenium of corpus callosum	33875891	rs2267161	chr22:30953295	C=0.674, T=0.326	9e-14
rs2267161	IDP dMRI TBSS ICVF Cingulum hippocampus L	33875891	rs2267161	chr22:30953295	C=0.674, T=0.326	3e-11
rs2267161	IDP dMRI ProbtrackX ICVF cst l	33875891	rs2267161	chr22:30953295	C=0.674, T=0.326	2e-15
rs2267161	IDP dMRI ProbtrackX ICVF mcp	33875891	rs2267161	chr22:30953295	C=0.674, T=0.326	6e-13
rs2267161	IDP dMRI ProbtrackX ICVF cst r	33875891	rs2267161	chr22:30953295	C=0.674, T=0.326	4e-15
rs2267161	wg lh intensity-contrast lateraloccipital	33875891	rs2267161	chr22:30953295	C=0.674, T=0.326	5e-14
rs2267161	wg lh intensity-contrast middletemporal	33875891	rs2267161	chr22:30953295	C=0.674, T=0.326	3e-12
rs2267161	wg lh intensity-contrast fusiform	33875891	rs2267161	chr22:30953295	C=0.674, T=0.326	5e-10
rs2267161	wg lh intensity-contrast inferiorparietal	33875891	rs2267161	chr22:30953295	C=0.674, T=0.326	6e-15
rs2267161	aseg rh intensity Putamen	33875891	rs2267161	chr22:30953295	C=0.674, T=0.326	7e-13
rs2267161	wg lh intensity-contrast precuneus	33875891	rs2267161	chr22:30953295	C=0.674, T=0.326	1e-13
rs2267161	wg lh intensity-contrast inferiortemporal	33875891	rs2267161	chr22:30953295	C=0.674, T=0.326	5e-14
rs2267161	wg lh intensity-contrast isthmuscingulate	33875891	rs2267161	chr22:30953295	C=0.674, T=0.326	1e-10
rs2267161	wg lh intensity-contrast caudalmiddlefrontal	33875891	rs2267161	chr22:30953295	C=0.674, T=0.326	3e-09
rs2267161	wg rh intensity-contrast posteriorcingulate	33875891	rs2267161	chr22:30953295	C=0.674, T=0.326	2e-09
rs2267161	wg rh intensity-contrast precuneus	33875891	rs2267161	chr22:30953295	C=0.674, T=0.326	5e-12
rs2267161	wg rh intensity-contrast rostralmiddlefrontal	33875891	rs2267161	chr22:30953295	C=0.674, T=0.326	1e-09
rs2267161	wg rh intensity-contrast superiorparietal	33875891	rs2267161	chr22:30953295	C=0.674, T=0.326	2e-12
rs2267161	wg rh intensity-contrast superiortemporal	33875891	rs2267161	chr22:30953295	C=0.674, T=0.326	2e-09
rs2267161	wg rh intensity-contrast supramarginal	33875891	rs2267161	chr22:30953295	C=0.674, T=0.326	7e-11
rs2267161	IDP dMRI TBSS L2 Splenium of corpus callosum	33875891	rs2267161	chr22:30953295	C=0.674, T=0.326	2e-14
rs2267161	IDP dMRI TBSS L2 Posterior limb of internal capsule R	33875891	rs2267161	chr22:30953295	C=0.674, T=0.326	3e-11
rs2267161	IDP dMRI TBSS ICVF Splenium of corpus callosum	33875891	rs2267161	chr22:30953295	C=0.674, T=0.326	2e-17
rs2267161	IDP dMRI TBSS ICVF Cerebral peduncle R	33875891	rs2267161	chr22:30953295	C=0.674, T=0.326	3e-16
rs2267161	IDP dMRI TBSS ICVF Cerebral peduncle L	33875891	rs2267161	chr22:30953295	C=0.674, T=0.326	1e-13
rs2267161	Subcortical volume (MOSTest)	32665545	rs2267161	chr22:30953295	C=0.674, T=0.326	2e-13
rs2267161	Sulfatide (d18:1/24:0(OH) levels) levels	35668104	rs2267161	chr22:30953295	C=0.674, T=0.326	4e-21
rs2267161	Phosphatidylglycerol(32:1)_[M+OAc]1- levels	34503513	rs2267161	chr22:30953295	C=0.674, T=0.326	4e-13
rs2267161	Creutzfeldt-Jakob disease (sporadic)	32949544	rs2267161	chr22:30953295	C=0.674, T=0.326	2e-10
rs2267161	Sulfatide (d18:1/16:0) levels	35668104	rs2267161	chr22:30953295	C=0.674, T=0.326	1e-33
rs2267161	Sulfatide (d18:1/16:0(OH) levels) levels	35668104	rs2267161	chr22:30953295	C=0.674, T=0.326	1e-37
rs2267161	Total Sulfatide levels	35668104	rs2267161	chr22:30953295	C=0.674, T=0.326	7e-14
rs2267161	Sulfatide (d18:1/16:0) levels	35668104	rs2267161	chr22:30953295	C=0.674, T=0.326	2e-21
rs2267161	Sulfatide (d18:1/16:0(OH) levels) levels	35668104	rs2267161	chr22:30953295	C=0.674, T=0.326	5e-21
rs2267161	Sulfatide (d18:1/24:0(OH) levels) levels	35668104	rs2267161	chr22:30953295	C=0.674, T=0.326	2e-15
rs2267161	Total Sulfatide levels	35668104	rs2267161	chr22:30953295	C=0.674, T=0.326	3e-27
rs2267161	Brain morphology (MOSTest)	35164939	rs2267161	chr22:30953295	C=0.674, T=0.326	5e-16
rs2267161	Corpus callosum mid-anterior volume	37164063	rs2267161	chr22:30953295	C=0.674, T=0.326	5e-10
rs2267161	Corpus callosum fractional anisotropy (splenium)	37164063	rs2267161	chr22:30953295	C=0.674, T=0.326	4e-16
rs2267161	Corpus callosum fractional anisotropy (MOSTest)	37164063	rs2267161	chr22:30953295	C=0.674, T=0.326	2e-15
rs2267161	Corpus callosum Mid-posterior volume	37164063	rs2267161	chr22:30953295	C=0.674, T=0.326	7e-10
rs2267161	Corpus callosum posterior volume	37164063	rs2267161	chr22:30953295	C=0.674, T=0.326	5e-08
rs2267161	Corpus callosum volume	37164063	rs2267161	chr22:30953295	C=0.674, T=0.326	6e-12
rs2267161	Corpus callosum volume (MOSTest)	37164063	rs2267161	chr22:30953295	C=0.674, T=0.326	2e-10
rs2267161	DTI TBSS MD Superior longitudinal fasciculus R	38811844	rs2267161	chr22:30953295	C=0.674, T=0.326	7e-06
rs2267161	DTI TBSS MD Superior longitudinal fasciculus L	38811844	rs2267161	chr22:30953295	C=0.674, T=0.326	2e-06
rs2267161	DTI TBSS MD Cingulum hippocampus R	38811844	rs2267161	chr22:30953295	C=0.674, T=0.326	5e-07
rs2267161	DTI TBSS L2 Splenium of corpus callosum	38811844	rs2267161	chr22:30953295	C=0.674, T=0.326	3e-07
rs2267161	DTI autoptx MD slf l tract	38811844	rs2267161	chr22:30953295	C=0.674, T=0.326	8e-06
rs2267161	DTI autoptx MD slf r tract	38811844	rs2267161	chr22:30953295	C=0.674, T=0.326	4e-06
rs2267161	DTI autoptx MD cgc l tract	38811844	rs2267161	chr22:30953295	C=0.674, T=0.326	1e-05
rs33599	White matter microstructure (radial diusivities)	31666681	rs33599	chr5:82774904	A=0.254, G=0.746	2e-12
rs33599	White matter microstructure (radial diusivities)	31666681	rs33599	chr5:82774904	A=0.254, G=0.746	4e-11
rs33599	White matter microstructure (radial diusivities)	31666681	rs33599	chr5:82774904	A=0.254, G=0.746	1e-11
rs33599	White matter microstructure (fractional anisotropy)	31666681	rs33599	chr5:82774904	A=0.254, G=0.746	7e-09
rs33599	White matter microstructure (fractional anisotropy)	31666681	rs33599	chr5:82774904	A=0.254, G=0.746	4e-08
rs225694	Height	20881960	rs225694	chr6:142527142	A=0.242, G=0.758	1e-07
rs77126132	Brain region volumes	31676860	rs77126132	chr7:54966738	A=0.12, G=0.88	3e-08
rs77126132	IDP dMRI TBSS ICVF Posterior limb of internal capsule R	33875891	rs77126132	chr7:54966738	A=0.12, G=0.88	1e-11
rs77126132	IDP dMRI TBSS L3 Splenium of corpus callosum	33875891	rs77126132	chr7:54966738	A=0.12, G=0.88	3e-11
rs77126132	IDP dMRI TBSS ICVF Superior longitudinal fasciculus L	33875891	rs77126132	chr7:54966738	A=0.12, G=0.88	3e-12
rs77126132	IDP dMRI ProbtrackX ICVF ar l	33875891	rs77126132	chr7:54966738	A=0.12, G=0.88	7e-10
rs77126132	IDP dMRI ProbtrackX ICVF ar r	33875891	rs77126132	chr7:54966738	A=0.12, G=0.88	1e-09
rs77126132	IDP dMRI TBSS ICVF Cingulum cingulate gyrus L	33875891	rs77126132	chr7:54966738	A=0.12, G=0.88	3e-10
rs77126132	IDP dMRI ProbtrackX ICVF cst l	33875891	rs77126132	chr7:54966738	A=0.12, G=0.88	9e-11
rs77126132	IDP dMRI ProbtrackX ICVF cst r	33875891	rs77126132	chr7:54966738	A=0.12, G=0.88	4e-11
rs77126132	IDP dMRI ProbtrackX ICVF fmi	33875891	rs77126132	chr7:54966738	A=0.12, G=0.88	1e-10
rs77126132	IDP dMRI TBSS ICVF Genu of corpus callosum	33875891	rs77126132	chr7:54966738	A=0.12, G=0.88	3e-15
rs77126132	IDP dMRI TBSS ICVF Body of corpus callosum	33875891	rs77126132	chr7:54966738	A=0.12, G=0.88	2e-24
rs77126132	IDP dMRI TBSS ICVF Splenium of corpus callosum	33875891	rs77126132	chr7:54966738	A=0.12, G=0.88	1e-21
rs77126132	IDP dMRI TBSS ICVF Cerebral peduncle R	33875891	rs77126132	chr7:54966738	A=0.12, G=0.88	4e-18
rs77126132	IDP dMRI TBSS ICVF Cerebral peduncle L	33875891	rs77126132	chr7:54966738	A=0.12, G=0.88	2e-20
rs77126132	IDP dMRI ProbtrackX ICVF slf l	33875891	rs77126132	chr7:54966738	A=0.12, G=0.88	1e-11
rs77126132	Vertex-wise cortical thickness	34910505	rs77126132	chr7:54966738	A=0.12, G=0.88	9e-16
rs77126132	Regional cortical thickness (cuneus)	38890310	rs77126132	chr7:54966738	A=0.12, G=0.88	3e-08
rs77126132	Posterolateral temporal area (unadjusted for global measures)	36893272	rs77126132	chr7:54966738	A=0.12, G=0.88	4e-11
rs77126132	Corpus callosum fractional anisotropy (MOSTest)	37164063	rs77126132	chr7:54966738	A=0.12, G=0.88	9e-16
rs77126132	Corpus callosum fractional anisotropy (splenium)	37164063	rs77126132	chr7:54966738	A=0.12, G=0.88	6e-15
rs4977575	Pulse pressure	28135244	rs4977575	chr9:22124744	C=0.519, G=0.481	1e-07
rs4977575	Coronary artery disease	28714974	rs4977575	chr9:22124744	C=0.519, G=0.481	5e-23
rs4977575	Abdominal aortic aneurysm	34469433	rs4977575	chr9:22124744	C=0.519, G=0.481	1e-07
rs4977575	Aortic aneurysm	34594039	rs4977575	chr9:22124744	C=0.519, G=0.481	6e-09
rs4977575	Subarachnoid hemorrhage	34594039	rs4977575	chr9:22124744	C=0.519, G=0.481	8e-13
rs4977575	Pulse pressure	38689001	rs4977575	chr9:22124744	C=0.519, G=0.481	8e-20
rs4977575	Coronary artery calcification	37770635	rs4977575	chr9:22124744	C=0.519, G=0.481	7e-47
rs4977575	Coronary artery calcification	37770635	rs4977575	chr9:22124744	C=0.519, G=0.481	7e-06
rs9303241	Pulse pressure	27841878	rs9303241	chr17:1978963	A=0.601, T=0.399	1e-09
rs9303241	Systolic blood pressure	27841878	rs9303241	chr17:1978963	A=0.601, T=0.399	2e-07
rs9303241	Smoking initiation	36477530	rs9303241	chr17:1978963	A=0.601, T=0.399	1e-35
rs10788930	Hip circumference adjusted for BMI	34021172	rs10788930	chr1:51118253	C=0.85, T=0.15	1e-12
rs76928645	Brain region volumes	31676860	rs76928645	chr7:54941328	C=0.873, T=0.127	9e-10
rs76928645	Brain region volumes	31676860	rs76928645	chr7:54941328	C=0.873, T=0.127	3e-11
rs76928645	Brain morphology (min-P)	32665545	rs76928645	chr7:54941328	C=0.873, T=0.127	3e-08
rs76928645	ThalamNuclei lh volume Whole-thalamus	33875891	rs76928645	chr7:54941328	C=0.873, T=0.127	2e-11
rs76928645	Thalamus volume	34006833	rs76928645	chr7:54941328	C=0.873, T=0.127	7e-19
rs76928645	Subcortical volume (MOSTest)	32665545	rs76928645	chr7:54941328	C=0.873, T=0.127	5e-30
rs76928645	Subcortical volume (min-P)	32665545	rs76928645	chr7:54941328	C=0.873, T=0.127	8e-09
rs76928645	Alzheimer's disease	35379992	rs76928645	chr7:54941328	C=0.873, T=0.127	2e-10
rs76928645	Regional cortical thickness (caudalmiddlefrontal)	38890310	rs76928645	chr7:54941328	C=0.873, T=0.127	2e-09
rs76928645	Brain morphology (MOSTest)	35164939	rs76928645	chr7:54941328	C=0.873, T=0.127	4e-50
rs76928645	Precuneus area (unadjusted for global measures)	36893272	rs76928645	chr7:54941328	C=0.873, T=0.127	6e-18
rs76928645	Parsopercularis area (unadjusted for global measures)	36893272	rs76928645	chr7:54941328	C=0.873, T=0.127	5e-14
rs76928645	Orbitofrontal area (unadjusted for global measures)	36893272	rs76928645	chr7:54941328	C=0.873, T=0.127	1e-18
rs76928645	Cortical surface area	36893272	rs76928645	chr7:54941328	C=0.873, T=0.127	5e-16
rs76928645	Dorsolateral prefrontal area (unadjusted for global measures)	36893272	rs76928645	chr7:54941328	C=0.873, T=0.127	5e-21
rs76928645	Anteromedial temporal area (unadjusted for global measures)	36893272	rs76928645	chr7:54941328	C=0.873, T=0.127	2e-11
rs76928645	Dorsomedial frontal area (unadjusted for global measures)	36893272	rs76928645	chr7:54941328	C=0.873, T=0.127	1e-17
rs76928645	Motor premotor area (unadjusted for global measures)	36893272	rs76928645	chr7:54941328	C=0.873, T=0.127	3e-19
rs76928645	Inferior parietal area (unadjusted for global measures)	36893272	rs76928645	chr7:54941328	C=0.873, T=0.127	2e-10
rs76928645	Occipital area (unadjusted for global measures)	36893272	rs76928645	chr7:54941328	C=0.873, T=0.127	1e-16
rs76928645	Superior temporal area (unadjusted for global measures)	36893272	rs76928645	chr7:54941328	C=0.873, T=0.127	3e-12
rs76928645	Superior parietal area (unadjusted for global measures)	36893272	rs76928645	chr7:54941328	C=0.873, T=0.127	9e-18
rs76928645	Medial prefrontal thickness (unadjusted for global measures)	36893272	rs76928645	chr7:54941328	C=0.873, T=0.127	8e-09
rs76928645	Alzheimer's disease	37985413	rs76928645	chr7:54941328	C=0.873, T=0.127	2e-08
rs1571535	Triglyceride levels	34887591	rs1571535	chr9:92215734	C=0.527, T=0.473	3e-15
rs7319045	Height	25282103	rs7319045	chr13:92024574	A=0.379, G=0.621	8e-15
rs7319045	Height	25429064	rs7319045	chr13:92024574	A=0.379, G=0.621	1e-10
rs7319045	Height	20881960	rs7319045	chr13:92024574	A=0.379, G=0.621	1e-11
rs7319045	Height	30595370	rs7319045	chr13:92024574	A=0.379, G=0.621	3e-63
rs7319045	Hip circumference adjusted for BMI	34021172	rs7319045	chr13:92024574	A=0.379, G=0.621	5e-10
rs7319045	FVC	36641522	rs7319045	chr13:92024574	A=0.379, G=0.621	2e-12
rs3784239	Brain shape (segment 1)	33821002	rs3784239	chr14:105629947	C=0.366, T=0.634	6e-12
rs7196814	IDP dMRI ProbtrackX ISOVF unc l	33875891	rs7196814	chr16:51449760	A=0.441, G=0.559	3e-24
rs7196814	IDP dMRI ProbtrackX ISOVF unc r	33875891	rs7196814	chr16:51449760	A=0.441, G=0.559	9e-28
rs7196814	IDP dMRI ProbtrackX L3 unc r	33875891	rs7196814	chr16:51449760	A=0.441, G=0.559	1e-21
rs7196814	IDP dMRI ProbtrackX L1 unc l	33875891	rs7196814	chr16:51449760	A=0.441, G=0.559	1e-22
rs7196814	IDP dMRI TBSS ISOVF Anterior corona radiata L	33875891	rs7196814	chr16:51449760	A=0.441, G=0.559	2e-13
rs7196814	IDP dMRI TBSS ISOVF External capsule L	33875891	rs7196814	chr16:51449760	A=0.441, G=0.559	3e-19
rs7256200	Free cholesterol levels in medium HDL	35213538	rs7256200	chr19:45415935	G=0.875, T=0.125	2e-24
rs7256200	Cerebral amyloid deposition (PET imaging)	30361487	rs7256200	chr19:45415935	G=0.875, T=0.125	1e-19
rs7256200	Concentration of HDL particles	35213538	rs7256200	chr19:45415935	G=0.875, T=0.125	4e-10
rs7256200	Total lipid levels in HDL	35213538	rs7256200	chr19:45415935	G=0.875, T=0.125	1e-25
rs7256200	F-glutamate liking (derived food-liking factor)	35585065	rs7256200	chr19:45415935	G=0.875, T=0.125	9e-11
rs7256200	Gamma glutamyl transpeptidase	34594039	rs7256200	chr19:45415935	G=0.875, T=0.125	2e-10
rs7256200	High density lipoprotein cholesterol levels	34887591	rs7256200	chr19:45415935	G=0.875, T=0.125	2e-19
rs1861435	Mean platelet volume	32888493	rs1861435	chr2:37075013	A=0.437, T=0.563	2e-66
rs1861435	Mean platelet volume	32888493	rs1861435	chr2:37075013	A=0.437, T=0.563	5e-64
rs1861435	Mean platelet volume	32888494	rs1861435	chr2:37075013	A=0.437, T=0.563	2e-53
rs1861435	Triglyceride levels	32203549	rs1861435	chr2:37075013	A=0.437, T=0.563	3e-12
rs1861435	Whole brain restricted isotropic diffusion (multivariate analysis)	35505052	rs1861435	chr2:37075013	A=0.437, T=0.563	8e-41
rs1861435	Whole brain restricted directional diffusion (multivariate analysis)	35505052	rs1861435	chr2:37075013	A=0.437, T=0.563	4e-45
rs1861435	Edge-level brain connectivity (multivariate analysis)	36800424	rs1861435	chr2:37075013	A=0.437, T=0.563	4e-35
rs1861435	Cortical surface area	34560273	rs1861435	chr2:37075013	A=0.437, T=0.563	1e-17
rs1861435	Regional cortical thickness (middletemporal)	38890310	rs1861435	chr2:37075013	A=0.437, T=0.563	3e-09
rs1861435	Regional cortical thickness (parsopercularis)	38890310	rs1861435	chr2:37075013	A=0.437, T=0.563	4e-08
rs1861435	Vertex-wise sulcal depth	34910505	rs1861435	chr2:37075013	A=0.437, T=0.563	5e-177
rs1861435	Vertex-wise cortical surface area	34910505	rs1861435	chr2:37075013	A=0.437, T=0.563	1e-86
rs1861435	Triglyceride levels in non-type 2 diabetes	36269708	rs1861435	chr2:37075013	A=0.437, T=0.563	1e-10
rs1861435	White blood cell count	38116116	rs1861435	chr2:37075013	A=0.437, T=0.563	3e-08
rs7225002	White matter microstructure (axial diusivities)	31666681	rs7225002	chr17:44189067	A=0.561, G=0.439	5e-08
rs7225002	Mean corpuscular hemoglobin	32888494	rs7225002	chr17:44189067	A=0.561, G=0.439	3e-24
rs7225002	Parkinson's disease or first degree relation to individual with Parkinson's disease	31701892	rs7225002	chr17:44189067	A=0.561, G=0.439	2e-40
rs7225002	Red cell distribution width	32888494	rs7225002	chr17:44189067	A=0.561, G=0.439	1e-21
rs7225002	Red cell distribution width	30595370	rs7225002	chr17:44189067	A=0.561, G=0.439	7e-78
rs7225002	Neuroticism	29942085	rs7225002	chr17:44189067	A=0.561, G=0.439	6e-09
rs7225002	Depressed affect	29942085	rs7225002	chr17:44189067	A=0.561, G=0.439	3e-09
rs7225002	Mean corpuscular hemoglobin	30595370	rs7225002	chr17:44189067	A=0.561, G=0.439	3e-30
rs7225002	Chronotype	30696823	rs7225002	chr17:44189067	A=0.561, G=0.439	5e-08
rs7225002	General factor of neuroticism	30867560	rs7225002	chr17:44189067	A=0.561, G=0.439	3e-08
rs7225002	Waist-hip index	34021172	rs7225002	chr17:44189067	A=0.561, G=0.439	5e-08
rs7225002	Hippocampal subfield left CA3 volume (body)	37337106	rs7225002	chr17:44189067	A=0.561, G=0.439	7e-10
rs7225002	Medial prefrontal thickness (unadjusted for global measures)	36893272	rs7225002	chr17:44189067	A=0.561, G=0.439	2e-09
rs6748809	Corpus callosum fractional anisotropy (genu)	37164063	rs6748809	chr2:98391355	C=0.344, T=0.656	4e-09
rs6748809	Corpus callosum fractional anisotropy (body)	37164063	rs6748809	chr2:98391355	C=0.344, T=0.656	6e-11
rs6748809	Corpus callosum fractional anisotropy (MOSTest)	37164063	rs6748809	chr2:98391355	C=0.344, T=0.656	3e-09
rs16843452	Parkinson's disease	38155330	rs16843452	chr4:2849168	C=0.807, T=0.193	3e-07
rs34470113	Corpus callosum fractional anisotropy (body)	37164063	rs34470113	chr6:28607995	C=0.814, T=0.186	1e-11
rs34470113	Corpus callosum fractional anisotropy (MOSTest)	37164063	rs34470113	chr6:28607995	C=0.814, T=0.186	2e-12
rs11136342	Height	36224396	rs11136342	chr8:145044749	A=0.59, G=0.41	3e-08
rs11136342	Corpus callosum fractional anisotropy (body)	37164063	rs11136342	chr8:145044749	A=0.59, G=0.41	4e-11
rs7605601	Heart failure	36376295	rs7605601	chr2:37147975	G=0.477, T=0.523	1e-11
rs7605601	Left-hemisphere dorsal attention network to right-hemisphere somatomotor network white-matter structural connectivity	38438384	rs7605601	chr2:37147975	G=0.477, T=0.523	2e-08
rs6469870	Corpus callosum fractional anisotropy (MOSTest)	37164063	rs6469870	chr8:120922013	A=0.438, G=0.562	3e-08
rs72813426	IDP dMRI TBSS MO Retrolenticular part of internal capsule R	33875891	rs72813426	chr16:89933007	A=0.751, G=0.249	2e-08
rs72813426	Left鈥搑ight brain asymmetry	33723403	rs72813426	chr16:89933007	A=0.751, G=0.249	2e-14
rs72813426	Whole brain restricted directional diffusion (multivariate analysis)	35505052	rs72813426	chr16:89933007	A=0.751, G=0.249	8e-27
rs72813426	Node-level brain connectivity (multivariate analysis)	36800424	rs72813426	chr16:89933007	A=0.751, G=0.249	4e-13
rs72813426	Cortical surface area	34560273	rs72813426	chr16:89933007	A=0.751, G=0.249	1e-17
rs72813426	Vertex-wise sulcal depth	34910505	rs72813426	chr16:89933007	A=0.751, G=0.249	1e-70
rs72813426	Vertex-wise cortical thickness	34910505	rs72813426	chr16:89933007	A=0.751, G=0.249	6e-22
rs72813426	Vertex-wise cortical surface area	34910505	rs72813426	chr16:89933007	A=0.751, G=0.249	7e-27
rs3795503	White matter microstructure (fractional anisotropy)	31666681	rs3795503	chr1:180905694	C=0.699, T=0.301	1e-10
rs3795503	Monocyte count	32888493	rs3795503	chr1:180905694	C=0.699, T=0.301	2e-20
rs3795503	Monocyte count	32888493	rs3795503	chr1:180905694	C=0.699, T=0.301	1e-19
rs3795503	Platelet count	32888493	rs3795503	chr1:180905694	C=0.699, T=0.301	5e-11
rs3795503	Platelet count	32888493	rs3795503	chr1:180905694	C=0.699, T=0.301	2e-10
rs3795503	Monocyte count	32888494	rs3795503	chr1:180905694	C=0.699, T=0.301	7e-14
rs3795503	White blood cell count	32888493	rs3795503	chr1:180905694	C=0.699, T=0.301	2e-14
rs3795503	Height	30595370	rs3795503	chr1:180905694	C=0.699, T=0.301	1e-23
rs3795503	Serum alkaline phosphatase levels	33547301	rs3795503	chr1:180905694	C=0.699, T=0.301	1e-10
rs3795503	White blood cell count	32888493	rs3795503	chr1:180905694	C=0.699, T=0.301	4e-14
rs3795503	IDP dMRI ProbtrackX FA str l	33875891	rs3795503	chr1:180905694	C=0.699, T=0.301	1e-10
rs3795503	IDP dMRI ProbtrackX FA str r	33875891	rs3795503	chr1:180905694	C=0.699, T=0.301	5e-10
rs3795503	Appendicular lean mass	33097823	rs3795503	chr1:180905694	C=0.699, T=0.301	2e-18
rs3795503	Estimated glomerular filtration rate	31152163	rs3795503	chr1:180905694	C=0.699, T=0.301	9e-15
rs3795503	Estimated glomerular filtration rate	31152163	rs3795503	chr1:180905694	C=0.699, T=0.301	9e-14
rs3795503	White blood cell count	30595370	rs3795503	chr1:180905694	C=0.699, T=0.301	6e-09
rs3795503	Serum alkaline phosphatase levels	34594039	rs3795503	chr1:180905694	C=0.699, T=0.301	2e-16
rs3795503	Whole brain free water diffusion (multivariate analysis)	35505052	rs3795503	chr1:180905694	C=0.699, T=0.301	2e-21
rs3795503	White blood cell count	32888494	rs3795503	chr1:180905694	C=0.699, T=0.301	3e-12
rs3795503	Estimated glomerular filtration rate	31015462	rs3795503	chr1:180905694	C=0.699, T=0.301	8e-13
rs3795503	Node-level brain connectivity (multivariate analysis)	36800424	rs3795503	chr1:180905694	C=0.699, T=0.301	2e-11
rs3795503	Cortical surface area	34560273	rs3795503	chr1:180905694	C=0.699, T=0.301	1e-17
rs3795503	Serum creatinine levels	34594039	rs3795503	chr1:180905694	C=0.699, T=0.301	4e-18
rs3795503	Estimated glomerular filtration rate (creatinine)	35710981	rs3795503	chr1:180905694	C=0.699, T=0.301	2e-23
rs3795503	Height	36224396	rs3795503	chr1:180905694	C=0.699, T=0.301	4e-12
rs3795503	Height	36224396	rs3795503	chr1:180905694	C=0.699, T=0.301	5e-14
rs3795503	Height	34594039	rs3795503	chr1:180905694	C=0.699, T=0.301	2e-16
rs3795503	Vertex-wise cortical surface area	34910505	rs3795503	chr1:180905694	C=0.699, T=0.301	4e-16
rs3795503	Estimated glomerular filtration rate (cystatin c)	34272381	rs3795503	chr1:180905694	C=0.699, T=0.301	8e-09
rs3795503	Monocyte count	34594039	rs3795503	chr1:180905694	C=0.699, T=0.301	6e-11
rs3795503	Blood urea nitrogen levels	34272381	rs3795503	chr1:180905694	C=0.699, T=0.301	8e-06
rs3795503	Estimated glomerular filtration rate (creatinine)	34272381	rs3795503	chr1:180905694	C=0.699, T=0.301	6e-21
rs3795503	Estimated glomerular filtration rate (creatinine)	34272381	rs3795503	chr1:180905694	C=0.699, T=0.301	2e-16
rs3795503	Fornix white matter microstructure (intra-cellular volume fraction)	37236919	rs3795503	chr1:180905694	C=0.699, T=0.301	8e-11
rs3795503	Whole body fat free mass (UKB data field 23101)	38538606	rs3795503	chr1:180905694	C=0.699, T=0.301	8e-12
rs3795503	T1 brain MRIs Unsupervised Deep learning derived Imaging Phenotypes (dimension 24)	38580839	rs3795503	chr1:180905694	C=0.699, T=0.301	6e-19
rs3795503	Height	36224396	rs3795503	chr1:180905694	C=0.699, T=0.301	2e-149
rs798518	Brain morphology (MOSTest)	35164939	rs798518	chr7:2777825	A=0.698, G=0.302	1e-23
rs798518	Fornix white matter microstructure (diffusion tensor mode)	37236919	rs798518	chr7:2777825	A=0.698, G=0.302	4e-11
rs798518	Corpus callosum fractional anisotropy (MOSTest)	37164063	rs798518	chr7:2777825	A=0.698, G=0.302	2e-10
rs10980628	Colorectal cancer or advanced adenoma	30510241	rs10980628	chr9:113671403	C=0.192, T=0.808	3e-09
rs4843552	White matter microstructure (mode of anisotropy)	31666681	rs4843552	chr16:87233516	A=0.552, G=0.448	1e-17
rs4843552	White matter microstructure (fractional anisotropy)	31666681	rs4843552	chr16:87233516	A=0.552, G=0.448	7e-10
rs4843552	Brain region volumes	31676860	rs4843552	chr16:87233516	A=0.552, G=0.448	2e-21
rs6088765	Ulcerative colitis	23128233	rs6088765	chr20:33799280	G=0.438, T=0.562	2e-08
rs6088765	Ulcerative colitis	26192919	rs6088765	chr20:33799280	G=0.438, T=0.562	1e-06
rs6088765	Whole body fat free mass (UKB data field 23101)	38538606	rs6088765	chr20:33799280	G=0.438, T=0.562	3e-63
rs13056506	Refractive error	32231278	rs13056506	chr22:38580917	G=0.414, T=0.586	2e-13
rs72761269	White matter microstructure (mode of anisotropy)	31666681	rs72761269	chr5:66153524	A=0.343, G=0.657	7e-11
rs309591	White matter microstructure (radial diusivities)	31666681	rs309591	chr5:82849675	C=0.097, T=0.903	2e-19
rs309591	White matter microstructure (radial diusivities)	31666681	rs309591	chr5:82849675	C=0.097, T=0.903	2e-11
rs309591	White matter microstructure (fractional anisotropy)	31666681	rs309591	chr5:82849675	C=0.097, T=0.903	1e-18
rs309591	White matter microstructure (fractional anisotropy)	31666681	rs309591	chr5:82849675	C=0.097, T=0.903	1e-08
rs309591	White matter microstructure (mean diusivities)	31666681	rs309591	chr5:82849675	C=0.097, T=0.903	5e-15
rs309591	White matter microstructure (mean diusivities)	31666681	rs309591	chr5:82849675	C=0.097, T=0.903	9e-17
rs309591	White matter microstructure (mean diusivities)	31666681	rs309591	chr5:82849675	C=0.097, T=0.903	2e-23
rs309591	White matter microstructure (mean diusivities)	31666681	rs309591	chr5:82849675	C=0.097, T=0.903	3e-14
rs309591	White matter microstructure (axial diusivities)	31666681	rs309591	chr5:82849675	C=0.097, T=0.903	7e-13
rs309591	White matter microstructure (axial diusivities)	31666681	rs309591	chr5:82849675	C=0.097, T=0.903	7e-12
rs309591	White matter microstructure (axial diusivities)	31666681	rs309591	chr5:82849675	C=0.097, T=0.903	6e-09
rs309591	White matter microstructure (radial diusivities)	31666681	rs309591	chr5:82849675	C=0.097, T=0.903	2e-08
rs309591	White matter microstructure (mean diusivities)	31666681	rs309591	chr5:82849675	C=0.097, T=0.903	3e-19
rs309591	White matter microstructure (axial diusivities)	31666681	rs309591	chr5:82849675	C=0.097, T=0.903	2e-08
rs309591	White matter microstructure (axial diusivities)	31666681	rs309591	chr5:82849675	C=0.097, T=0.903	2e-11
rs309591	White matter microstructure (radial diusivities)	31666681	rs309591	chr5:82849675	C=0.097, T=0.903	5e-13
rs309591	White matter microstructure (radial diusivities)	31666681	rs309591	chr5:82849675	C=0.097, T=0.903	7e-16
rs309591	White matter microstructure (radial diusivities)	31666681	rs309591	chr5:82849675	C=0.097, T=0.903	8e-17
rs309591	White matter microstructure (radial diusivities)	31666681	rs309591	chr5:82849675	C=0.097, T=0.903	1e-13
rs309591	White matter microstructure (mean diusivities)	31666681	rs309591	chr5:82849675	C=0.097, T=0.903	4e-22
rs17180132	Mean spheric corpuscular volume	32888494	rs17180132	chr14:65209909	A=0.013, G=0.987	4e-14
rs76653948	IDP dMRI ProbtrackX L1 cgc r	33875891	rs76653948	chr17:9151562	C=0.816, G=0.184	3e-09
rs76653948	IDP dMRI TBSS L1 Cingulum cingulate gyrus R	33875891	rs76653948	chr17:9151562	C=0.816, G=0.184	5e-09
rs6077868	White matter microstructure (axial diusivities)	31666681	rs6077868	chr20:10649761	C=0.785, T=0.215	4e-09
rs6077868	White matter microstructure (axial diusivities)	31666681	rs6077868	chr20:10649761	C=0.785, T=0.215	7e-09
rs6077868	Lymphocyte count	32888493	rs6077868	chr20:10649761	C=0.785, T=0.215	2e-10
rs6077868	Brain shape (segment 3)	33821002	rs6077868	chr20:10649761	C=0.785, T=0.215	3e-09
rs6077868	Eosinophil counts	32888494	rs6077868	chr20:10649761	C=0.785, T=0.215	2e-09
rs6077868	Whole brain restricted directional diffusion (multivariate analysis)	35505052	rs6077868	chr20:10649761	C=0.785, T=0.215	1e-13
rs6077868	Cortical surface area	34560273	rs6077868	chr20:10649761	C=0.785, T=0.215	1e-11
rs6077868	Vertex-wise sulcal depth	34910505	rs6077868	chr20:10649761	C=0.785, T=0.215	5e-18
rs6077868	Vertex-wise cortical surface area	34910505	rs6077868	chr20:10649761	C=0.785, T=0.215	5e-13
rs6077868	Brain morphology (MOSTest)	35164939	rs6077868	chr20:10649761	C=0.785, T=0.215	4e-25
rs6077868	Fornix white matter microstructure (isotropic or free water volume fraction)	37236919	rs6077868	chr20:10649761	C=0.785, T=0.215	1e-10
rs6077868	Pulse pressure	38459180	rs6077868	chr20:10649761	C=0.785, T=0.215	1e-11
rs152234	Brain region volumes	31676860	rs152234	chr5:179335060	A=0.114, G=0.886	2e-12
rs9795439	Morningness	30804565	rs9795439	chr11:1483543	A=0.195, G=0.805	7e-09
rs9795439	White matter microstructure (mode of anisotropy)	31666681	rs9795439	chr11:1483543	A=0.195, G=0.805	3e-08
rs9795439	Vertex-wise sulcal depth	34910505	rs9795439	chr11:1483543	A=0.195, G=0.805	3e-14
rs2415142	Cortical thickness	34560273	rs2415142	chr15:73431600	G=0.548, T=0.452	2e-15
rs2415142	Brain morphology (MOSTest)	32665545	rs2415142	chr15:73431600	G=0.548, T=0.452	5e-11
rs2415142	Regional cortical thickness (posteriorcingulate)	38890310	rs2415142	chr15:73431600	G=0.548, T=0.452	1e-08
rs2415142	High density lipoprotein cholesterol levels	34887591	rs2415142	chr15:73431600	G=0.548, T=0.452	4e-08
rs2415142	Vertex-wise cortical thickness	34910505	rs2415142	chr15:73431600	G=0.548, T=0.452	2e-14
rs2415142	Brain morphology (MOSTest)	35164939	rs2415142	chr15:73431600	G=0.548, T=0.452	3e-14
rs3117427	Receptor for advanced glycosylation end products levels	33067605	rs3117427	chr6:29274136	C=0.073, T=0.927	2e-11
rs118087478	Brain region volumes	31676860	rs118087478	chr17:44051589	G=0.241, T=0.759	8e-14
rs118087478	Left-hemisphere limbic network to caudate white-matter structural connectivity	38438384	rs118087478	chr17:44051589	G=0.241, T=0.759	4e-13
rs12496226	Sex hormone-binding globulin levels	34321204	rs12496226	chr3:49734040	G=0.691, T=0.309	1e-09
rs10510025	Body mass index	31669095	rs10510025	chr10:118650996	C=0.74, T=0.26	1e-13
rs10510025	Brain region volumes	31676860	rs10510025	chr10:118650996	C=0.74, T=0.26	3e-08
rs10510025	Cortical surface area (MOSTest)	32665545	rs10510025	chr10:118650996	C=0.74, T=0.26	1e-12
rs10510025	Body mass index	30595370	rs10510025	chr10:118650996	C=0.74, T=0.26	7e-13
rs10510025	Body mass index	37280435	rs10510025	chr10:118650996	C=0.74, T=0.26	2e-13
rs10510025	Body mass index	38538606	rs10510025	chr10:118650996	C=0.74, T=0.26	6e-09
rs10510025	Whole body fat mass (UKB data field 23100)	38538606	rs10510025	chr10:118650996	C=0.74, T=0.26	5e-11
rs8070753	White matter microstructure (mode of anisotropy)	31666681	rs8070753	chr17:9264728	A=0.334, G=0.666	8e-09
rs6077869	White matter microstructure (mode of anisotropy)	31666681	rs6077869	chr20:10650510	A=0.761, G=0.239	2e-09
rs1004763	White matter microstructure (radial diusivities)	31666681	rs1004763	chr22:38474952	C=0.419, T=0.581	3e-08
rs1004763	White matter microstructure (radial diusivities)	31666681	rs1004763	chr22:38474952	C=0.419, T=0.581	8e-09
rs1004763	White matter microstructure (fractional anisotropy)	31666681	rs1004763	chr22:38474952	C=0.419, T=0.581	7e-10
rs1004763	White matter microstructure (radial diusivities)	31666681	rs1004763	chr22:38474952	C=0.419, T=0.581	2e-09
rs1004763	IDP dMRI TBSS ICVF Sagittal stratum L	33875891	rs1004763	chr22:38474952	C=0.419, T=0.581	8e-10
rs1004763	IDP dMRI TBSS ICVF Fornix cres+Stria terminalis R	33875891	rs1004763	chr22:38474952	C=0.419, T=0.581	2e-09
rs1004763	IDP dMRI TBSS ICVF Cingulum hippocampus R	33875891	rs1004763	chr22:38474952	C=0.419, T=0.581	6e-09
rs1004763	IDP dMRI TBSS ICVF Body of corpus callosum	33875891	rs1004763	chr22:38474952	C=0.419, T=0.581	1e-21
rs1004763	IDP dMRI TBSS ICVF Splenium of corpus callosum	33875891	rs1004763	chr22:38474952	C=0.419, T=0.581	1e-09
rs1768208	Progressive supranuclear palsy	21685912	rs1768208	chr3:39523003	C=0.695, T=0.305	5e-17
rs1768208	Corticobasal degeneration	26077951	rs1768208	chr3:39523003	C=0.695, T=0.305	2e-07
rs1768208	Ventral frontal thickness (unadjusted for global measures)	36893272	rs1768208	chr3:39523003	C=0.695, T=0.305	1e-18
rs55982832	Blood urea nitrogen levels	34594039	rs55982832	chr7:55050103	A=0.229, G=0.771	3e-08
rs11589479	Adventurousness	30643258	rs11589479	chr1:155033308	A=0.182, G=0.818	3e-11
rs11589479	Mosquito bite size	28199695	rs11589479	chr1:155033308	A=0.182, G=0.818	6e-06
rs11589479	Chin dimples	27182965	rs11589479	chr1:155033308	A=0.182, G=0.818	5e-11
rs11589479	Brain shape (segment 1)	33821002	rs11589479	chr1:155033308	A=0.182, G=0.818	1e-18
rs11589479	Varicose veins	34594039	rs11589479	chr1:155033308	A=0.182, G=0.818	1e-08
rs11589479	Facial morphology (segment 1)	33288918	rs11589479	chr1:155033308	A=0.182, G=0.818	4e-09
rs11589479	Albumin levels	35213538	rs11589479	chr1:155033308	A=0.182, G=0.818	1e-10
rs11589479	Whole brain restricted directional diffusion (multivariate analysis)	35505052	rs11589479	chr1:155033308	A=0.182, G=0.818	2e-22
rs11589479	Albumin levels	38448586	rs11589479	chr1:155033308	A=0.182, G=0.818	5e-10
rs11589479	Serum albumin levels	34594039	rs11589479	chr1:155033308	A=0.182, G=0.818	2e-42
rs11589479	Primary open angle glaucoma (MTAG)	37386247	rs11589479	chr1:155033308	A=0.182, G=0.818	9e-09
rs11589479	Primary open angle glaucoma (multi-trait analysis)	37386247	rs11589479	chr1:155033308	A=0.182, G=0.818	5e-09
rs11589479	Edge-level brain connectivity (multivariate analysis)	36800424	rs11589479	chr1:155033308	A=0.182, G=0.818	6e-17
rs11589479	Cortical surface area	34560273	rs11589479	chr1:155033308	A=0.182, G=0.818	1e-17
rs11589479	Vertical cup-disc ratio	34077760	rs11589479	chr1:155033308	A=0.182, G=0.818	2e-08
rs11589479	Vertex-wise sulcal depth	34910505	rs11589479	chr1:155033308	A=0.182, G=0.818	6e-78
rs11589479	Vertex-wise cortical surface area	34910505	rs11589479	chr1:155033308	A=0.182, G=0.818	2e-21
rs11589479	Vertical cup-disc ratio	34077760	rs11589479	chr1:155033308	A=0.182, G=0.818	1e-08
rs11589479	Non-HDL cholesterol levels	34887591	rs11589479	chr1:155033308	A=0.182, G=0.818	5e-10
rs11589479	Orbital telorism	34791242	rs11589479	chr1:155033308	A=0.182, G=0.818	8e-15
rs11589479	Albumin levels	34321204	rs11589479	chr1:155033308	A=0.182, G=0.818	9e-13
rs11589479	Albumin levels	34321204	rs11589479	chr1:155033308	A=0.182, G=0.818	7e-10
rs11589479	Albumin levels	34321204	rs11589479	chr1:155033308	A=0.182, G=0.818	2e-13
rs11589479	Varicose veins	36653477	rs11589479	chr1:155033308	A=0.182, G=0.818	4e-10
rs11589479	Disintegrin and metalloproteinase domain-containing protein 15 levels	34857772	rs11589479	chr1:155033308	A=0.182, G=0.818	2e-207
rs2248390	Resistance to COVID-19 infection (Exposed negative vs positive)	36662838	rs2248390	chr7:2855594	C=0.415, T=0.585	2e-21
rs17178006	Hippocampal volume	22504421	rs17178006	chr12:65718299	G=0.082, T=0.918	5e-11
rs17178006	Brain region volumes	31676860	rs17178006	chr12:65718299	G=0.082, T=0.918	6e-35
rs17178006	Brain region volumes	31676860	rs17178006	chr12:65718299	G=0.082, T=0.918	6e-35
rs17178006	Brain region volumes	31676860	rs17178006	chr12:65718299	G=0.082, T=0.918	7e-10
rs17178006	Brain region volumes	31676860	rs17178006	chr12:65718299	G=0.082, T=0.918	1e-09
rs17178006	Brain region volumes	31676860	rs17178006	chr12:65718299	G=0.082, T=0.918	2e-09
rs17178006	Brain region volumes	31676860	rs17178006	chr12:65718299	G=0.082, T=0.918	1e-08
rs17178006	Subcortical volume (MOSTest)	32665545	rs17178006	chr12:65718299	G=0.082, T=0.918	3e-36
rs17178006	Subcortical brain region volumes	25607358	rs17178006	chr12:65718299	G=0.082, T=0.918	3e-07
rs17178006	aseg rh volume Hippocampus	33875891	rs17178006	chr12:65718299	G=0.082, T=0.918	4e-26
rs17178006	AmygNuclei rh volume Basal-nucleus	33875891	rs17178006	chr12:65718299	G=0.082, T=0.918	1e-12
rs17178006	AmygNuclei rh volume Whole-amygdala	33875891	rs17178006	chr12:65718299	G=0.082, T=0.918	1e-13
rs17178006	HippSubfield lh volume hippocampal-fissure	33875891	rs17178006	chr12:65718299	G=0.082, T=0.918	9e-11
rs17178006	HippSubfield lh volume CA1-head	33875891	rs17178006	chr12:65718299	G=0.082, T=0.918	6e-25
rs17178006	HippSubfield lh volume Whole-hippocampus	33875891	rs17178006	chr12:65718299	G=0.082, T=0.918	5e-22
rs17178006	HippSubfield rh volume CA1-body	33875891	rs17178006	chr12:65718299	G=0.082, T=0.918	1e-21
rs17178006	HippSubfield rh volume subiculum-head	33875891	rs17178006	chr12:65718299	G=0.082, T=0.918	5e-15
rs17178006	HippSubfield rh volume hippocampal-fissure	33875891	rs17178006	chr12:65718299	G=0.082, T=0.918	4e-15
rs17178006	HippSubfield rh volume CA1-head	33875891	rs17178006	chr12:65718299	G=0.082, T=0.918	4e-28
rs17178006	HippSubfield lh volume molecular-layer-HP-head	33875891	rs17178006	chr12:65718299	G=0.082, T=0.918	3e-17
rs17178006	HippSubfield lh volume GC-ML-DG-head	33875891	rs17178006	chr12:65718299	G=0.082, T=0.918	5e-24
rs17178006	HippSubfield lh volume CA4-head	33875891	rs17178006	chr12:65718299	G=0.082, T=0.918	3e-24
rs17178006	HippSubfield lh volume CA4-body	33875891	rs17178006	chr12:65718299	G=0.082, T=0.918	4e-12
rs17178006	HippSubfield lh volume CA3-head	33875891	rs17178006	chr12:65718299	G=0.082, T=0.918	6e-19
rs17178006	HippSubfield lh volume Whole-hippocampal-head	33875891	rs17178006	chr12:65718299	G=0.082, T=0.918	1e-26
rs17178006	HippSubfield rh volume Whole-hippocampal-head	33875891	rs17178006	chr12:65718299	G=0.082, T=0.918	5e-28
rs17178006	HippSubfield rh volume Whole-hippocampus	33875891	rs17178006	chr12:65718299	G=0.082, T=0.918	7e-26
rs17178006	HippSubfield rh volume molecular-layer-HP-head	33875891	rs17178006	chr12:65718299	G=0.082, T=0.918	4e-20
rs17178006	HippSubfield rh volume GC-ML-DG-head	33875891	rs17178006	chr12:65718299	G=0.082, T=0.918	3e-18
rs17178006	HippSubfield rh volume CA3-body	33875891	rs17178006	chr12:65718299	G=0.082, T=0.918	3e-16
rs17178006	HippSubfield rh volume CA4-head	33875891	rs17178006	chr12:65718299	G=0.082, T=0.918	4e-15
rs17178006	HippSubfield rh volume CA4-body	33875891	rs17178006	chr12:65718299	G=0.082, T=0.918	8e-11
rs17178006	HippSubfield rh volume CA3-head	33875891	rs17178006	chr12:65718299	G=0.082, T=0.918	4e-14
rs17178006	HippSubfield rh volume Whole-hippocampal-body	33875891	rs17178006	chr12:65718299	G=0.082, T=0.918	2e-15
rs17178006	aseg lh volume Hippocampus	33875891	rs17178006	chr12:65718299	G=0.082, T=0.918	2e-21
rs17178006	Brain shape (segment 15)	33821002	rs17178006	chr12:65718299	G=0.082, T=0.918	3e-26
rs17178006	Appendicular lean mass	33097823	rs17178006	chr12:65718299	G=0.082, T=0.918	2e-11
rs17178006	Hippocampal subfield CA1 volume	30279459	rs17178006	chr12:65718299	G=0.082, T=0.918	6e-28
rs17178006	Presubiculum volume (corrected for total hippocampal volume)	30279459	rs17178006	chr12:65718299	G=0.082, T=0.918	2e-15
rs17178006	Hippocampal subfield CA1 volume (corrected for total hippocampal volume)	30279459	rs17178006	chr12:65718299	G=0.082, T=0.918	8e-19
rs17178006	Hippocampal subfield CA3 volume	30279459	rs17178006	chr12:65718299	G=0.082, T=0.918	9e-19
rs17178006	Hippocampal subfield CA4 volume	30279459	rs17178006	chr12:65718299	G=0.082, T=0.918	3e-19
rs17178006	Dentate gyrus granule cell layer volume	30279459	rs17178006	chr12:65718299	G=0.082, T=0.918	5e-21
rs17178006	Hippocampal fissure volume	30279459	rs17178006	chr12:65718299	G=0.082, T=0.918	2e-13
rs17178006	Whole amygdala volume	37391117	rs17178006	chr12:65718299	G=0.082, T=0.918	4e-17
rs17178006	Whole amygdala volume	37391117	rs17178006	chr12:65718299	G=0.082, T=0.918	2e-17
rs17178006	FEV1	36641522	rs17178006	chr12:65718299	G=0.082, T=0.918	1e-11
rs17178006	Posterolateral temporal area (unadjusted for global measures)	36893272	rs17178006	chr12:65718299	G=0.082, T=0.918	1e-09
rs17178006	FVC	36641522	rs17178006	chr12:65718299	G=0.082, T=0.918	7e-18
rs17178006	Dorsomedial frontal area (unadjusted for global measures)	36893272	rs17178006	chr12:65718299	G=0.082, T=0.918	2e-14
rs12888467	Brain shape (segment 1)	33821002	rs12888467	chr14:29235537	C=0.504, G=0.496	9e-12
rs12888467	Cortical surface area	34560273	rs12888467	chr14:29235537	C=0.504, G=0.496	1e-17
rs12888467	Vertex-wise cortical surface area	34910505	rs12888467	chr14:29235537	C=0.504, G=0.496	1e-23
rs12888467	Brain morphology (MOSTest)	35164939	rs12888467	chr14:29235537	C=0.504, G=0.496	7e-16
rs34404554	Cerebral amyloid deposition (PET imaging)	30361487	rs34404554	chr19:45395909	C=0.869, G=0.131	2e-15
rs2780818	IDP dMRI TBSS ICVF Retrolenticular part of internal capsule L	33875891	rs2780818	chr1:65307994	G=0.253, T=0.747	3e-13
rs2780818	IDP dMRI TBSS ICVF External capsule R	33875891	rs2780818	chr1:65307994	G=0.253, T=0.747	5e-12
rs2780818	IDP dMRI TBSS ICVF Retrolenticular part of internal capsule R	33875891	rs2780818	chr1:65307994	G=0.253, T=0.747	9e-12
rs2780818	IDP dMRI TBSS ICVF Superior longitudinal fasciculus L	33875891	rs2780818	chr1:65307994	G=0.253, T=0.747	2e-11
rs2780818	IDP dMRI ProbtrackX ICVF ar r	33875891	rs2780818	chr1:65307994	G=0.253, T=0.747	1e-11
rs2780818	IDP dMRI TBSS ICVF External capsule L	33875891	rs2780818	chr1:65307994	G=0.253, T=0.747	5e-14
rs2780818	DTI TBSS MD Posterior limb of internal capsule L	38811844	rs2780818	chr1:65307994	G=0.253, T=0.747	4e-06
rs6819977	IDP dMRI ProbtrackX L1 ilf r	33875891	rs6819977	chr4:185137596	A=0.567, C=0.433	6e-09
rs10244020	Dorsolateral prefrontal area (unadjusted for global measures)	36893272	rs10244020	chr7:55108994	C=0.482, T=0.518	3e-08
rs4755851	White matter microstructure (mean diusivities)	31666681	rs4755851	chr11:44626461	C=0.87, G=0.13	3e-10
rs4755851	White matter microstructure (axial diusivities)	31666681	rs4755851	chr11:44626461	C=0.87, G=0.13	4e-08
rs4755851	White matter microstructure (mean diusivities)	31666681	rs4755851	chr11:44626461	C=0.87, G=0.13	2e-08
rs4755851	DTI TBSS L3 Posterior limb of internal capsule R	38811844	rs4755851	chr11:44626461	C=0.87, G=0.13	2e-07
rs4755851	DTI TBSS L2 External capsule R	38811844	rs4755851	chr11:44626461	C=0.87, G=0.13	8e-10
rs4755851	DTI TBSS L3 External capsule R	38811844	rs4755851	chr11:44626461	C=0.87, G=0.13	7e-11
rs2267158	White matter microstructure (radial diusivities)	31666681	rs2267158	chr22:30950360	C=0.339, T=0.661	1e-08
rs2267158	White matter microstructure (radial diusivities)	31666681	rs2267158	chr22:30950360	C=0.339, T=0.661	1e-08
rs2267158	White matter microstructure (fractional anisotropy)	31666681	rs2267158	chr22:30950360	C=0.339, T=0.661	6e-10
rs2267158	White matter microstructure (mean diusivities)	31666681	rs2267158	chr22:30950360	C=0.339, T=0.661	4e-08
rs2267158	White matter microstructure (fractional anisotropy)	31666681	rs2267158	chr22:30950360	C=0.339, T=0.661	2e-09
rs2267158	White matter microstructure (radial diusivities)	31666681	rs2267158	chr22:30950360	C=0.339, T=0.661	6e-09
rs2267158	White matter microstructure (fractional anisotropy)	31666681	rs2267158	chr22:30950360	C=0.339, T=0.661	2e-08
rs2267158	Brain morphology (min-P)	32665545	rs2267158	chr22:30950360	C=0.339, T=0.661	5e-08
rs2267158	aseg lh intensity Putamen	33875891	rs2267158	chr22:30950360	C=0.339, T=0.661	1e-11
rs2267158	IDP dMRI TBSS ICVF Genu of corpus callosum	33875891	rs2267158	chr22:30950360	C=0.339, T=0.661	5e-15
rs2267158	IDP dMRI TBSS ICVF Body of corpus callosum	33875891	rs2267158	chr22:30950360	C=0.339, T=0.661	9e-21
rs2267158	Subcortical volume (min-P)	32665545	rs2267158	chr22:30950360	C=0.339, T=0.661	1e-08
rs2267158	Whole brain restricted isotropic diffusion (multivariate analysis)	35505052	rs2267158	chr22:30950360	C=0.339, T=0.661	2e-14
rs2267158	Sulfatide (d18:1/24:0) levels	35668104	rs2267158	chr22:30950360	C=0.339, T=0.661	5e-12
rs2267158	Sulfatide (d18:1/24:1(OH) levels) levels	35668104	rs2267158	chr22:30950360	C=0.339, T=0.661	6e-14
rs2267158	Sulfatide (d18:1/24:0) levels	35668104	rs2267158	chr22:30950360	C=0.339, T=0.661	5e-10
rs2267158	Sulfatide (d18:1/24:1(OH) levels) levels	35668104	rs2267158	chr22:30950360	C=0.339, T=0.661	4e-11
rs2267158	Sulfatide (d18:1/16:0) levels	35668104	rs2267158	chr22:30950360	C=0.339, T=0.661	9e-38
rs2267158	Estimated glomerular filtration rate (creatinine)	35710981	rs2267158	chr22:30950360	C=0.339, T=0.661	2e-14
rs191692	Body mass index (MTAG)	36376304	rs191692	chr2:60461578	A=0.409, G=0.591	2e-08
rs2110974	Height	28552196	rs2110974	chr2:66788591	A=0.313, G=0.687	2e-06
rs6761645	Systemic lupus erythematosus	36324510	rs6761645	chr2:232055153	A=0.253, T=0.747	4e-06
rs9395049	Lymphocyte count	32888494	rs9395049	chr6:44792718	A=0.544, G=0.456	2e-10
rs9395049	Nose morphology	29921221	rs9395049	chr6:44792718	A=0.544, G=0.456	1e-06
rs12370774	Left-hemisphere somatomotor network to thalamus white-matter structural connectivity	38438384	rs12370774	chr12:106510413	C=0.903, T=0.097	3e-14
rs4714260	Vertex-wise cortical thickness	34910505	rs4714260	chr6:39536622	C=0.374, T=0.626	4e-28
rs4714260	Cranial vault shape (segment 1)	37973980	rs4714260	chr6:39536622	C=0.374, T=0.626	2e-17
rs2489623	Waist circumference	25673412	rs2489623	chr6:127455821	A=0.505, C=0.495	3e-08
rs2489623	R-spondin-3 levels (RSPO3.13094.75.3)	29875488	rs2489623	chr6:127455821	A=0.505, C=0.495	4e-28
rs2489623	Trypsin-1 levels	34648354	rs2489623	chr6:127455821	A=0.505, C=0.495	6e-12
rs2489623	Bone mineral density mean	37500982	rs2489623	chr6:127455821	A=0.505, C=0.495	9e-23
rs7108427	Sex hormone-binding globulin levels	36653534	rs7108427	chr11:47044113	G=0.323, T=0.677	2e-08
rs9369127	Vertical cup-disc ratio	34077760	rs9369127	chr6:39531474	A=0.341, T=0.659	3e-20
rs542444	Hair color	30595370	rs542444	chr6:44800015	C=0.239, T=0.761	6e-11
rs542444	Brain shape (segment 1)	33821002	rs542444	chr6:44800015	C=0.239, T=0.761	1e-09
rs542444	Whole brain restricted isotropic diffusion (multivariate analysis)	35505052	rs542444	chr6:44800015	C=0.239, T=0.761	2e-22
rs542444	Whole brain free water diffusion (multivariate analysis)	35505052	rs542444	chr6:44800015	C=0.239, T=0.761	5e-21
rs9491697	Crohn's disease	23128233	rs9491697	chr6:127456122	A=0.58, G=0.42	4e-10
rs9491697	Apolipoprotein B levels	32203549	rs9491697	chr6:127456122	A=0.58, G=0.42	9e-18
rs9491697	Crohn's disease	28067908	rs9491697	chr6:127456122	A=0.58, G=0.42	2e-09
rs9491697	HDL cholesterol levels	35213538	rs9491697	chr6:127456122	A=0.58, G=0.42	2e-13
rs9491697	Cholesterol levels in medium HDL	35213538	rs9491697	chr6:127456122	A=0.58, G=0.42	3e-11
rs9491697	Concentration of medium HDL particles	35213538	rs9491697	chr6:127456122	A=0.58, G=0.42	9e-09
rs9491697	Cholesteryl ester levels in medium HDL	35213538	rs9491697	chr6:127456122	A=0.58, G=0.42	1e-11
rs9491697	Free cholesterol levels in medium HDL	35213538	rs9491697	chr6:127456122	A=0.58, G=0.42	3e-09
rs9491697	Cholesteryl ester levels in large HDL	35213538	rs9491697	chr6:127456122	A=0.58, G=0.42	4e-16
rs9491697	Cholesteryl ester levels in HDL	35213538	rs9491697	chr6:127456122	A=0.58, G=0.42	4e-14
rs9491697	Total lipid levels in HDL	35213538	rs9491697	chr6:127456122	A=0.58, G=0.42	3e-10
rs9491697	Cholesterol levels in large HDL	35213538	rs9491697	chr6:127456122	A=0.58, G=0.42	1e-15
rs9491697	R-spondin-3 levels	34814699	rs9491697	chr6:127456122	A=0.58, G=0.42	5e-33
rs9491697	Blood urea nitrogen levels	36329257	rs9491697	chr6:127456122	A=0.58, G=0.42	5e-13
rs9491697	Cranial vault shape (segment 3)	37973980	rs9491697	chr6:127456122	A=0.58, G=0.42	2e-09
rs9491697	Bone mineral density mean	37500982	rs9491697	chr6:127456122	A=0.58, G=0.42	2e-32
rs2003585	Hypertrophic cardiomyopathy (sarcomere negative)	33495597	rs2003585	chr2:37123383	C=0.526, T=0.474	1e-07
rs2003585	Subcortical volume (MOSTest)	32665545	rs2003585	chr2:37123383	C=0.526, T=0.474	2e-17
rs2003585	Node-level brain connectivity (multivariate analysis)	36800424	rs2003585	chr2:37123383	C=0.526, T=0.474	1e-23
rs10932008	White matter microstructure (radial diusivities)	31666681	rs10932008	chr2:204048840	A=0.812, G=0.188	5e-08
rs10932008	Hematocrit	32888493	rs10932008	chr2:204048840	A=0.812, G=0.188	5e-10
rs10932008	White matter microstructure (radial diusivities)	31666681	rs10932008	chr2:204048840	A=0.812, G=0.188	1e-08
rs10932008	IDP dMRI TBSS L1 External capsule L	33875891	rs10932008	chr2:204048840	A=0.812, G=0.188	7e-11
rs11191772	Ischemic stroke	34594039	rs11191772	chr10:105459834	C=0.394, T=0.606	9e-10
rs11191772	Ischemic stroke	34594039	rs11191772	chr10:105459834	C=0.394, T=0.606	3e-09
rs62064364	White matter microstructure (axial diusivities)	31666681	rs62064364	chr17:43654468	C=0.763, T=0.237	5e-10
rs62064364	Macular thickness	30535121	rs62064364	chr17:43654468	C=0.763, T=0.237	4e-35
rs62064364	IDP dMRI TBSS L3 Anterior limb of internal capsule L	33875891	rs62064364	chr17:43654468	C=0.763, T=0.237	2e-28
rs62064364	Photoreceptor cell layer thickness phenotypes (MTAG)	36848389	rs62064364	chr17:43654468	C=0.763, T=0.237	4e-16
rs67827860	White matter microstructure (radial diusivities)	31666681	rs67827860	chr5:82860485	C=0.795, T=0.205	1e-16
rs67827860	White matter microstructure (fractional anisotropy)	31666681	rs67827860	chr5:82860485	C=0.795, T=0.205	6e-21
rs67827860	White matter microstructure (axial diusivities)	31666681	rs67827860	chr5:82860485	C=0.795, T=0.205	5e-12
rs67827860	Periventricular white matter hyperintensities	32517579	rs67827860	chr5:82860485	C=0.795, T=0.205	4e-06
rs67827860	IDP dMRI TBSS MD External capsule L	33875891	rs67827860	chr5:82860485	C=0.795, T=0.205	1e-22
rs67827860	IDP dMRI TBSS MD Posterior limb of internal capsule R	33875891	rs67827860	chr5:82860485	C=0.795, T=0.205	9e-16
rs67827860	IDP dMRI TBSS MD Retrolenticular part of internal capsule L	33875891	rs67827860	chr5:82860485	C=0.795, T=0.205	2e-28
rs67827860	wg rh intensity-contrast parahippocampal	33875891	rs67827860	chr5:82860485	C=0.795, T=0.205	2e-20
rs67827860	wg lh intensity-contrast rostralanteriorcingulate	33875891	rs67827860	chr5:82860485	C=0.795, T=0.205	5e-16
rs67827860	IDP dMRI ProbtrackX FA ilf l	33875891	rs67827860	chr5:82860485	C=0.795, T=0.205	4e-44
rs67827860	IDP dMRI ProbtrackX FA ilf r	33875891	rs67827860	chr5:82860485	C=0.795, T=0.205	9e-43
rs67827860	IDP dMRI TBSS FA Sagittal stratum R	33875891	rs67827860	chr5:82860485	C=0.795, T=0.205	4e-25
rs67827860	IDP dMRI ProbtrackX FA ifo l	33875891	rs67827860	chr5:82860485	C=0.795, T=0.205	2e-38
rs67827860	IDP dMRI TBSS L2 Cingulum hippocampus L	33875891	rs67827860	chr5:82860485	C=0.795, T=0.205	3e-34
rs67827860	IDP dMRI ProbtrackX MD unc r	33875891	rs67827860	chr5:82860485	C=0.795, T=0.205	5e-37
rs67827860	IDP dMRI TBSS L3 Uncinate fasciculus L	33875891	rs67827860	chr5:82860485	C=0.795, T=0.205	4e-25
rs67827860	IDP dMRI TBSS L3 Posterior limb of internal capsule R	33875891	rs67827860	chr5:82860485	C=0.795, T=0.205	2e-15
rs67827860	IDP dMRI TBSS L3 External capsule L	33875891	rs67827860	chr5:82860485	C=0.795, T=0.205	3e-27
rs67827860	IDP dMRI TBSS L3 Cingulum hippocampus L	33875891	rs67827860	chr5:82860485	C=0.795, T=0.205	1e-29
rs67827860	IDP dMRI ProbtrackX MD fmi	33875891	rs67827860	chr5:82860485	C=0.795, T=0.205	8e-41
rs67827860	IDP dMRI ProbtrackX MD ifo l	33875891	rs67827860	chr5:82860485	C=0.795, T=0.205	3e-46
rs67827860	IDP dMRI ProbtrackX MD ilf l	33875891	rs67827860	chr5:82860485	C=0.795, T=0.205	1e-44
rs67827860	IDP dMRI ProbtrackX MD ilf r	33875891	rs67827860	chr5:82860485	C=0.795, T=0.205	1e-44
rs67827860	IDP dMRI ProbtrackX MD ptr l	33875891	rs67827860	chr5:82860485	C=0.795, T=0.205	8e-24
rs67827860	IDP dMRI ProbtrackX MD slf l	33875891	rs67827860	chr5:82860485	C=0.795, T=0.205	7e-30
rs67827860	IDP dMRI TBSS ICVF Cingulum hippocampus L	33875891	rs67827860	chr5:82860485	C=0.795, T=0.205	1e-58
rs67827860	IDP dMRI TBSS ICVF Fornix cres+Stria terminalis R	33875891	rs67827860	chr5:82860485	C=0.795, T=0.205	3e-47
rs67827860	IDP dMRI TBSS ICVF Fornix cres+Stria terminalis L	33875891	rs67827860	chr5:82860485	C=0.795, T=0.205	8e-50
rs67827860	IDP dMRI ProbtrackX ICVF cgh l	33875891	rs67827860	chr5:82860485	C=0.795, T=0.205	1e-63
rs67827860	IDP dMRI ProbtrackX ICVF cgh r	33875891	rs67827860	chr5:82860485	C=0.795, T=0.205	1e-62
rs67827860	IDP dMRI TBSS ICVF Uncinate fasciculus L	33875891	rs67827860	chr5:82860485	C=0.795, T=0.205	3e-42
rs67827860	IDP dMRI ProbtrackX ICVF ar l	33875891	rs67827860	chr5:82860485	C=0.795, T=0.205	1e-70
rs67827860	wg lh intensity-contrast entorhinal	33875891	rs67827860	chr5:82860485	C=0.795, T=0.205	8e-11
rs67827860	wg lh intensity-contrast fusiform	33875891	rs67827860	chr5:82860485	C=0.795, T=0.205	9e-20
rs67827860	wg lh intensity-contrast parahippocampal	33875891	rs67827860	chr5:82860485	C=0.795, T=0.205	6e-14
rs67827860	wg lh intensity-contrast parsorbitalis	33875891	rs67827860	chr5:82860485	C=0.795, T=0.205	1e-13
rs67827860	wg rh intensity-contrast rostralanteriorcingulate	33875891	rs67827860	chr5:82860485	C=0.795, T=0.205	1e-16
rs67827860	IDP dMRI TBSS L2 External capsule L	33875891	rs67827860	chr5:82860485	C=0.795, T=0.205	9e-16
rs67827860	IDP dMRI TBSS L2 Splenium of corpus callosum	33875891	rs67827860	chr5:82860485	C=0.795, T=0.205	5e-29
rs67827860	IDP dMRI TBSS L2 Cerebral peduncle R	33875891	rs67827860	chr5:82860485	C=0.795, T=0.205	4e-10
rs67827860	IDP dMRI TBSS L2 Retrolenticular part of internal capsule L	33875891	rs67827860	chr5:82860485	C=0.795, T=0.205	7e-23
rs67827860	IDP dMRI TBSS L1 Retrolenticular part of internal capsule L	33875891	rs67827860	chr5:82860485	C=0.795, T=0.205	1e-10
rs67827860	IDP dMRI TBSS MD Cingulum hippocampus L	33875891	rs67827860	chr5:82860485	C=0.795, T=0.205	1e-45
rs67827860	IDP dMRI TBSS MD Uncinate fasciculus L	33875891	rs67827860	chr5:82860485	C=0.795, T=0.205	7e-28
rs67827860	IDP dMRI TBSS L1 Cingulum hippocampus L	33875891	rs67827860	chr5:82860485	C=0.795, T=0.205	3e-22
rs67827860	IDP dMRI ProbtrackX L1 fmi	33875891	rs67827860	chr5:82860485	C=0.795, T=0.205	3e-27
rs67827860	IDP dMRI ProbtrackX L1 ilf l	33875891	rs67827860	chr5:82860485	C=0.795, T=0.205	1e-27
rs67827860	IDP dMRI ProbtrackX L1 unc l	33875891	rs67827860	chr5:82860485	C=0.795, T=0.205	2e-23
rs67827860	IDP dMRI ProbtrackX L1 unc r	33875891	rs67827860	chr5:82860485	C=0.795, T=0.205	3e-24
rs67827860	IDP dMRI ProbtrackX L2 ar r	33875891	rs67827860	chr5:82860485	C=0.795, T=0.205	7e-20
rs67827860	IDP dMRI ProbtrackX L2 atr l	33875891	rs67827860	chr5:82860485	C=0.795, T=0.205	3e-21
rs67827860	IDP dMRI ProbtrackX L2 fmi	33875891	rs67827860	chr5:82860485	C=0.795, T=0.205	5e-38
rs67827860	IDP dMRI ProbtrackX L2 ifo l	33875891	rs67827860	chr5:82860485	C=0.795, T=0.205	2e-43
rs67827860	IDP dMRI ProbtrackX L2 ifo r	33875891	rs67827860	chr5:82860485	C=0.795, T=0.205	9e-43
rs67827860	IDP dMRI ProbtrackX L2 ilf l	33875891	rs67827860	chr5:82860485	C=0.795, T=0.205	4e-43
rs67827860	IDP dMRI ProbtrackX L2 ilf r	33875891	rs67827860	chr5:82860485	C=0.795, T=0.205	4e-43
rs67827860	IDP dMRI ProbtrackX L2 ptr l	33875891	rs67827860	chr5:82860485	C=0.795, T=0.205	6e-23
rs67827860	IDP dMRI ProbtrackX L2 str r	33875891	rs67827860	chr5:82860485	C=0.795, T=0.205	3e-26
rs67827860	IDP dMRI ProbtrackX L2 unc r	33875891	rs67827860	chr5:82860485	C=0.795, T=0.205	3e-35
rs67827860	IDP dMRI ProbtrackX L3 fmi	33875891	rs67827860	chr5:82860485	C=0.795, T=0.205	2e-38
rs67827860	IDP dMRI ProbtrackX L3 ilf l	33875891	rs67827860	chr5:82860485	C=0.795, T=0.205	3e-47
rs67827860	IDP dMRI ProbtrackX L3 ilf r	33875891	rs67827860	chr5:82860485	C=0.795, T=0.205	3e-47
rs67827860	IDP dMRI ProbtrackX ICVF str l	33875891	rs67827860	chr5:82860485	C=0.795, T=0.205	8e-45
rs67827860	White matter integrity (fractional anisotropy)	29752348	rs67827860	chr5:82860485	C=0.795, T=0.205	1e-14
rs67827860	White matter hyperintensity volume	29752348	rs67827860	chr5:82860485	C=0.795, T=0.205	3e-06
rs67827860	Edge-level brain connectivity (multivariate analysis)	36800424	rs67827860	chr5:82860485	C=0.795, T=0.205	2e-19
rs67827860	Node-level brain connectivity (multivariate analysis)	36800424	rs67827860	chr5:82860485	C=0.795, T=0.205	1e-35
rs67827860	Vertex-wise cortical thickness	34910505	rs67827860	chr5:82860485	C=0.795, T=0.205	1e-33
rs67827860	Right hippocampal volume (tail)	37337106	rs67827860	chr5:82860485	C=0.795, T=0.205	4e-09
rs67827860	DTI autoptx FA ifo l tract	38811844	rs67827860	chr5:82860485	C=0.795, T=0.205	2e-11
rs67827860	DTI autoptx FA ilf l tract	38811844	rs67827860	chr5:82860485	C=0.795, T=0.205	1e-09
rs67827860	DTI TBSS FA External capsule R	38811844	rs67827860	chr5:82860485	C=0.795, T=0.205	2e-06
rs67827860	DTI TBSS FA External capsule L	38811844	rs67827860	chr5:82860485	C=0.795, T=0.205	8e-07
rs67827860	DTI autoptx L2 unc r tract	38811844	rs67827860	chr5:82860485	C=0.795, T=0.205	3e-12
rs67827860	DTI autoptx L2 ifo l tract	38811844	rs67827860	chr5:82860485	C=0.795, T=0.205	1e-20
rs67827860	DTI autoptx L2 ilf l tract	38811844	rs67827860	chr5:82860485	C=0.795, T=0.205	5e-19
rs67827860	DTI TBSS L3 Sagittal stratum L	38811844	rs67827860	chr5:82860485	C=0.795, T=0.205	1e-19
rs67827860	DTI TBSS L2 External capsule L	38811844	rs67827860	chr5:82860485	C=0.795, T=0.205	1e-12
rs2228513	Short-chain dicarboxylacylcarnitine levels (additive genetic model)	26540294	rs2228513	chr15:63950887	A=0.059, G=0.941	8e-10
rs2228513	Short-chain dicarboxylacylcarnitine levels (dominant genetic model)	26540294	rs2228513	chr15:63950887	A=0.059, G=0.941	5e-08
rs2228513	Short-chain dicarboxylacylcarnitine levels (additive genetic model)	26540294	rs2228513	chr15:63950887	A=0.059, G=0.941	5e-06
rs2228513	Short-chain dicarboxylacylcarnitine levels (dominant genetic model)	26540294	rs2228513	chr15:63950887	A=0.059, G=0.941	7e-06
rs188579526	IDP dMRI TBSS OD External capsule L	33875891	rs188579526	chr1:197374884	C=0.908, T=0.092	2e-13
rs3807865	Depression (broad)	29662059	rs3807865	chr7:12250402	A=0.402, G=0.598	7e-12
rs3807865	Aspartate aminotransferase levels	34594039	rs3807865	chr7:12250402	A=0.402, G=0.598	9e-11
rs3807865	Major depressive disorder (MTAG)	33479212	rs3807865	chr7:12250402	A=0.402, G=0.598	9e-12
rs17055142	Regional cortical thickness (inferiorparietal)	38890310	rs17055142	chr8:26201601	C=0.911, T=0.089	5e-11
rs17055142	Regional cortical thickness (inferiortemporal)	38890310	rs17055142	chr8:26201601	C=0.911, T=0.089	8e-13
rs1998385	Cortical thickness	34560273	rs1998385	chr14:100361886	A=0.847, T=0.153	1e-17
rs4843553	White matter hyperintensity volume x hypertension interaction (2df)	33293549	rs4843553	chr16:87233185	A=0.445, C=0.555	1e-14
rs4843553	White matter hyperintensity volume (adjusted for hypertension)	33293549	rs4843553	chr16:87233185	A=0.445, C=0.555	1e-15
rs4843553	White matter hyperintensity volume	33293549	rs4843553	chr16:87233185	A=0.445, C=0.555	5e-16
rs4843553	Left-hemisphere limbic network to thalamus white-matter structural connectivity	38438384	rs4843553	chr16:87233185	A=0.445, C=0.555	3e-13
rs56305452	Eosinophil counts	32888493	rs56305452	chr17:65990500	A=0.77, C=0.23	7e-12
rs56305452	Cortical surface area (MOSTest)	32665545	rs56305452	chr17:65990500	A=0.77, C=0.23	4e-09
rs56305452	Whole brain restricted isotropic diffusion (multivariate analysis)	35505052	rs56305452	chr17:65990500	A=0.77, C=0.23	8e-25
rs56305452	Whole brain free water diffusion (multivariate analysis)	35505052	rs56305452	chr17:65990500	A=0.77, C=0.23	2e-22
rs56305452	Node-level brain connectivity (multivariate analysis)	36800424	rs56305452	chr17:65990500	A=0.77, C=0.23	5e-10
rs56305452	T1 FreeSurfer pial rh supramarginal area	38811844	rs56305452	chr17:65990500	A=0.77, C=0.23	5e-06
rs56305452	T1 FreeSurfer DK rh supramarginal volume	38811844	rs56305452	chr17:65990500	A=0.77, C=0.23	1e-06
rs56305452	T1 FreeSurfer DKT rh supramarginal volume	38811844	rs56305452	chr17:65990500	A=0.77, C=0.23	1e-06
rs9636202	Morningness	30804565	rs9636202	chr19:18449238	A=0.244, G=0.756	4e-08
rs9636202	Life satisfaction	27089181	rs9636202	chr19:18449238	A=0.244, G=0.756	7e-06
rs9636202	Gastroesophageal reflux disease	34187846	rs9636202	chr19:18449238	A=0.244, G=0.756	2e-10
rs9636202	Chronotype	30696823	rs9636202	chr19:18449238	A=0.244, G=0.756	4e-11
rs9636202	Mean arterial pressure	34594039	rs9636202	chr19:18449238	A=0.244, G=0.756	1e-11
rs6840385	Vertex-wise sulcal depth	34910505	rs6840385	chr4:97936878	G=0.731, T=0.269	3e-20
rs2346965	Fornix white matter microstructure (diffusion tensor mode)	37236919	rs2346965	chr2:19184217	A=0.152, G=0.848	1e-10
rs2346965	Fornix white matter microstructure (isotropic or free water volume fraction)	37236919	rs2346965	chr2:19184217	A=0.152, G=0.848	1e-09
rs6798507	Self-reported math ability (MTAG)	30038396	rs6798507	chr3:71547039	A=0.656, G=0.344	5e-09
rs6798507	Corpus callosum volume (MOSTest)	37164063	rs6798507	chr3:71547039	A=0.656, G=0.344	1e-08
rs798510	Subcortical volume (min-P)	32665545	rs798510	chr7:2783338	C=0.723, T=0.277	1e-13
rs798510	Brain morphology (min-P)	32665545	rs798510	chr7:2783338	C=0.723, T=0.277	4e-13
rs798510	IDP dMRI ProbtrackX ISOVF ar r	33875891	rs798510	chr7:2783338	C=0.723, T=0.277	1e-08
rs798510	Subcortical volume (MOSTest)	32665545	rs798510	chr7:2783338	C=0.723, T=0.277	1e-13
rs798510	Fornix white matter microstructure (isotropic or free water volume fraction)	37236919	rs798510	chr7:2783338	C=0.723, T=0.277	4e-10
rs798510	Left-hemisphere limbic network to putamen white-matter structural connectivity	38438384	rs798510	chr7:2783338	C=0.723, T=0.277	1e-08
rs12251016	Insomnia	30804565	rs12251016	chr10:21821918	A=0.637, T=0.363	4e-10
rs12251016	Endometriosis or migraine	32121467	rs12251016	chr10:21821918	A=0.637, T=0.363	5e-07
rs12251016	Brain shape (segment 1)	33821002	rs12251016	chr10:21821918	A=0.637, T=0.363	2e-26
rs12251016	Body mass index	30239722	rs12251016	chr10:21821918	A=0.637, T=0.363	1e-25
rs12251016	Whole brain free water diffusion (multivariate analysis)	35505052	rs12251016	chr10:21821918	A=0.637, T=0.363	3e-29
rs12251016	Node-level brain connectivity (multivariate analysis)	36800424	rs12251016	chr10:21821918	A=0.637, T=0.363	3e-19
rs12251016	Insomnia	35835914	rs12251016	chr10:21821918	A=0.637, T=0.363	3e-11
rs12251016	Corpus callosum central volume	37164063	rs12251016	chr10:21821918	A=0.637, T=0.363	2e-08
rs35791293	Blood protein levels	30072576	rs35791293	chr19:55886019	C=0.562, T=0.438	0
rs35791293	Corpus callosum central volume	37164063	rs35791293	chr19:55886019	C=0.562, T=0.438	2e-13
rs35791293	Corpus callosum volume (MOSTest)	37164063	rs35791293	chr19:55886019	C=0.562, T=0.438	2e-16
rs3120047	Brain region volumes	31676860	rs3120047	chr1:43764084	C=0.619, G=0.381	1e-08
rs3120047	Hemoglobin levels	32327693	rs3120047	chr1:43764084	C=0.619, G=0.381	1e-10
rs3120047	Whole brain restricted isotropic diffusion (multivariate analysis)	35505052	rs3120047	chr1:43764084	C=0.619, G=0.381	4e-13
rs3120047	Fornix white matter microstructure (isotropic or free water volume fraction)	37236919	rs3120047	chr1:43764084	C=0.619, G=0.381	5e-12
rs72780760	White matter microstructure (radial diusivities)	31666681	rs72780760	chr2:19187219	A=0.85, G=0.15	1e-08
rs72780760	White matter microstructure (mean diusivities)	31666681	rs72780760	chr2:19187219	A=0.85, G=0.15	3e-08
rs72780760	White matter microstructure (fractional anisotropy)	31666681	rs72780760	chr2:19187219	A=0.85, G=0.15	4e-08
rs13089287	Brain region volumes	31676860	rs13089287	chr3:190654424	C=0.4, T=0.6	9e-09
rs564819152	Physical activity (overall physical activity time)	30531941	rs564819152	chr10:21820650	A=0.665, G=0.335	4e-09
rs564819152	Whole brain restricted isotropic diffusion (multivariate analysis)	35505052	rs564819152	chr10:21820650	A=0.665, G=0.335	4e-36
rs564819152	Physical activity (Total log acceleration 8am-10am)	35043453	rs564819152	chr10:21820650	A=0.665, G=0.335	1e-09
rs564819152	Fornix white matter microstructure (isotropic or free water volume fraction)	37236919	rs564819152	chr10:21820650	A=0.665, G=0.335	7e-22
rs564819152	Body fat percentage (adjusted for testosterone and SHBG)	37867527	rs564819152	chr10:21820650	A=0.665, G=0.335	5e-10
rs4442541	Platelet count	32888493	rs4442541	chr11:10669172	A=0.302, G=0.698	4e-27
rs4442541	Platelet count	32888493	rs4442541	chr11:10669172	A=0.302, G=0.698	4e-27
rs4442541	Brain region volumes	31676860	rs4442541	chr11:10669172	A=0.302, G=0.698	4e-09
rs4442541	Platelet count	32888494	rs4442541	chr11:10669172	A=0.302, G=0.698	1e-17
rs4442541	Pain (pleiotropy)	37844115	rs4442541	chr11:10669172	A=0.302, G=0.698	5e-06
rs34859790	Whole brain free water diffusion (multivariate analysis)	35505052	rs34859790	chr3:190652830	C=0.6, T=0.4	4e-63
rs34859790	Vertex-wise sulcal depth	34910505	rs34859790	chr3:190652830	C=0.6, T=0.4	1e-128
rs34859790	Vertex-wise cortical surface area	34910505	rs34859790	chr3:190652830	C=0.6, T=0.4	1e-71
rs550532200	IDP dMRI TBSS ISOVF Fornix	33875891	rs550532200	chr10:21820652	A=0.665, C=0.335	3e-11
rs884894	Brain region volumes	31676860	rs884894	chr2:19184881	C=0.849, T=0.151	3e-08
rs61067594	T1 brain MRIs Unsupervised Deep learning derived Imaging Phenotypes (dimension 98)	38580839	rs61067594	chr3:190650833	A=0.405, G=0.595	1e-33
rs61067594	Right-hemisphere somatomotor network to thalamus white-matter structural connectivity	38438384	rs61067594	chr3:190650833	A=0.405, G=0.595	3e-12
rs61067594	Right-hemisphere limbic network to thalamus white-matter structural connectivity	38438384	rs61067594	chr3:190650833	A=0.405, G=0.595	1e-25
rs61067594	Left-hemisphere dorsal attention network to right-hemisphere control network white-matter structural connectivity	38438384	rs61067594	chr3:190650833	A=0.405, G=0.595	6e-09
rs61067594	Left-hemisphere salience/ventral attention network to right-hemisphere dorsal attention network white-matter structural connectivity	38438384	rs61067594	chr3:190650833	A=0.405, G=0.595	9e-11
rs61067594	Left-hemisphere salience/ventral attention network to right-hemisphere control network white-matter structural connectivity	38438384	rs61067594	chr3:190650833	A=0.405, G=0.595	5e-12
rs61067594	Left-hemisphere salience/ventral attention network to right-hemisphere default mode network white-matter structural connectivity	38438384	rs61067594	chr3:190650833	A=0.405, G=0.595	8e-11
rs61067594	Left-hemisphere control network to putamen white-matter structural connectivity	38438384	rs61067594	chr3:190650833	A=0.405, G=0.595	9e-09
rs798508	aseg rh volume Lateral-Ventricle	33875891	rs798508	chr7:2783815	C=0.718, G=0.282	6e-12
rs798508	IDP T1 SIENAX CSF normalised volume	33875891	rs798508	chr7:2783815	C=0.718, G=0.282	4e-13
rs798508	IDP T1 SIENAX CSF unnormalised volume	33875891	rs798508	chr7:2783815	C=0.718, G=0.282	5e-13
rs798508	IDP dMRI TBSS OD Body of corpus callosum	33875891	rs798508	chr7:2783815	C=0.718, G=0.282	5e-13
rs798508	aseg lh volume Lateral-Ventricle	33875891	rs798508	chr7:2783815	C=0.718, G=0.282	7e-14
rs798508	aseg global volume VentricleChoroid	33875891	rs798508	chr7:2783815	C=0.718, G=0.282	1e-13
rs798508	Left-hemisphere control network to thalamus white-matter structural connectivity	38438384	rs798508	chr7:2783815	C=0.718, G=0.282	2e-08
rs4978966	Ascending aorta minimum area	34968759	rs4978966	chr9:113662374	C=0.809, T=0.191	2e-10
rs4978966	Ascending aorta maximum area	34968759	rs4978966	chr9:113662374	C=0.809, T=0.191	3e-12
rs4978966	Ascending thoracic aortic diameter	34837083	rs4978966	chr9:113662374	C=0.809, T=0.191	3e-11
rs4978966	Ascending thoracic aortic diameter	34837083	rs4978966	chr9:113662374	C=0.809, T=0.191	3e-08
rs4978966	Ascending aorta maximum area	35922433	rs4978966	chr9:113662374	C=0.809, T=0.191	1e-09
rs4978966	Ascending aorta diameter	37019578	rs4978966	chr9:113662374	C=0.809, T=0.191	1e-11
rs9933149	White matter microstructure (radial diusivities)	31666681	rs9933149	chr16:87226206	C=0.591, T=0.409	1e-08
rs9933149	Regional cortical thickness (lateraloccipital)	38890310	rs9933149	chr16:87226206	C=0.591, T=0.409	5e-11
rs9933149	Corpus callosum fractional anisotropy (MOSTest)	37164063	rs9933149	chr16:87226206	C=0.591, T=0.409	8e-13
rs1243179	White matter microstructure (fractional anisotropy)	31666681	rs1243179	chr10:21912579	A=0.666, G=0.334	8e-12
rs2754523	Number of sexual partners in opposite-sex sexual behavior	34426668	rs2754523	chr2:32837110	A=0.562, G=0.438	3e-08
rs3770778	Temporal pole thickness (unadjusted for global measures)	36893272	rs3770778	chr2:37144195	A=0.468, T=0.532	4e-11
rs3770778	Medial temporal thickness (unadjusted for global measures)	36893272	rs3770778	chr2:37144195	A=0.468, T=0.532	4e-11
rs3770778	Left-hemisphere dorsal attention network to amygdala white-matter structural connectivity	38438384	rs3770778	chr2:37144195	A=0.468, T=0.532	3e-10
rs7371912	Migraine	35115687	rs7371912	chr3:30472786	A=0.319, G=0.681	1e-14
rs73079018	Intelligence	36378351	rs73079018	chr3:49875327	C=0.114, T=0.886	7e-12
rs72764483	Brain morphology (min-P)	32665545	rs72764483	chr5:64962816	A=0.742, G=0.258	8e-20
rs72764483	Subcortical volume (min-P)	32665545	rs72764483	chr5:64962816	A=0.742, G=0.258	4e-20
rs72764483	Subcortical volume (MOSTest)	32665545	rs72764483	chr5:64962816	A=0.742, G=0.258	2e-19
rs1078514	Red blood cell count	32888493	rs1078514	chr13:110463168	C=0.69, T=0.31	6e-11
rs1078514	Heel bone mineral density	28869591	rs1078514	chr13:110463168	C=0.69, T=0.31	1e-11
rs1078514	Heel bone mineral density	28869591	rs1078514	chr13:110463168	C=0.69, T=0.31	1e-07
rs1078514	Heel bone mineral density	30048462	rs1078514	chr13:110463168	C=0.69, T=0.31	1e-26
rs1078514	Parkinson's disease	38155330	rs1078514	chr13:110463168	C=0.69, T=0.31	2e-09
rs17665188	Experiencing mood swings	29500382	rs17665188	chr17:44357351	C=0.239, T=0.761	1e-18
rs4799450	White matter microstructure (radial diusivities)	31666681	rs4799450	chr18:35028901	C=0.62, T=0.38	1e-08
rs4799450	White matter microstructure (fractional anisotropy)	31666681	rs4799450	chr18:35028901	C=0.62, T=0.38	1e-12
rs4799450	Right-hemisphere visual network to pallidum white-matter structural connectivity	38438384	rs4799450	chr18:35028901	C=0.62, T=0.38	6e-16
rs72834696	Insomnia	35835914	rs72834696	chr6:26161399	A=0.217, G=0.783	3e-12
rs10148294	IDP dMRI TBSS FA Superior fronto-occipital fasciculus R	33875891	rs10148294	chr14:31361742	A=0.559, T=0.441	5e-09
rs10148294	IDP dMRI TBSS OD Superior fronto-occipital fasciculus R	33875891	rs10148294	chr14:31361742	A=0.559, T=0.441	3e-18
rs62055696	Physical activity	34753499	rs62055696	chr17:43758125	A=0.76, G=0.24	1e-11
rs62055696	Physical activity	34753499	rs62055696	chr17:43758125	A=0.76, G=0.24	1e-09
rs6446218	Whole brain free water diffusion (multivariate analysis)	35505052	rs6446218	chr3:49075513	A=0.337, T=0.663	2e-18
rs6446218	Whole brain restricted isotropic diffusion (multivariate analysis)	35505052	rs6446218	chr3:49075513	A=0.337, T=0.663	4e-17
rs2172442	IDP T1 FAST ROIs L cerebellum X	33875891	rs2172442	chr4:4762383	C=0.678, G=0.322	3e-11
rs2172442	IDP T1 FAST ROIs L cerebellum VI	33875891	rs2172442	chr4:4762383	C=0.678, G=0.322	6e-12
rs2172442	Whole brain restricted isotropic diffusion (multivariate analysis)	35505052	rs2172442	chr4:4762383	C=0.678, G=0.322	8e-24
rs2172442	Whole brain restricted directional diffusion (multivariate analysis)	35505052	rs2172442	chr4:4762383	C=0.678, G=0.322	2e-30
rs2172442	Whole brain free water diffusion (multivariate analysis)	35505052	rs2172442	chr4:4762383	C=0.678, G=0.322	2e-22
rs2172442	Vertex-wise sulcal depth	34910505	rs2172442	chr4:4762383	C=0.678, G=0.322	9e-17
rs2172442	T1 FreeSurfer aseg Left-Cerebellum-Cortex	38811844	rs2172442	chr4:4762383	C=0.678, G=0.322	3e-06
rs2976933	Waist-to-hip ratio adjusted for BMI	34021172	rs2976933	chr8:8254875	C=0.557, T=0.443	1e-08
rs2976933	Waist-hip index	34021172	rs2976933	chr8:8254875	C=0.557, T=0.443	1e-09
rs9521510	Heel bone mineral density	30598549	rs9521510	chr13:110426871	C=0.312, T=0.688	8e-28
rs9521510	Heel bone mineral density	30595370	rs9521510	chr13:110426871	C=0.312, T=0.688	5e-24
rs2780902	Diabetic kidney disease	26305897	rs2780902	chr1:65329100	C=0.748, T=0.252	3e-07
rs2780902	IDP dMRI TBSS ICVF Anterior limb of internal capsule R	33875891	rs2780902	chr1:65329100	C=0.748, T=0.252	5e-13
rs2780902	IDP dMRI TBSS ICVF Anterior limb of internal capsule L	33875891	rs2780902	chr1:65329100	C=0.748, T=0.252	2e-13
rs2780902	DTI TBSS MD Superior longitudinal fasciculus L	38811844	rs2780902	chr1:65329100	C=0.748, T=0.252	7e-06
rs62132522	White matter microstructure (axial diusivities)	31666681	rs62132522	chr2:37079583	C=0.433, T=0.567	2e-08
rs62132522	Cortical surface area	32193296	rs62132522	chr2:37079583	C=0.433, T=0.567	4e-08
rs62132522	Brain morphology (MOSTest)	32665545	rs62132522	chr2:37079583	C=0.433, T=0.567	6e-46
rs62132522	Cortical thickness (MOSTest)	32665545	rs62132522	chr2:37079583	C=0.433, T=0.567	3e-09
rs62132522	Cortical surface area (MOSTest)	32665545	rs62132522	chr2:37079583	C=0.433, T=0.567	2e-34
rs62132522	Platelet-to-lymphocyte ratio	34469753	rs62132522	chr2:37079583	C=0.433, T=0.567	5e-08
rs3772934	Body mass index (MTAG)	36376304	rs3772934	chr3:115417865	C=0.692, T=0.308	2e-08
rs34722008	Brain morphology (MOSTest)	32665545	rs34722008	chr4:38659594	A=0.285, G=0.715	3e-11
rs34722008	Subcortical volume (MOSTest)	32665545	rs34722008	chr4:38659594	A=0.285, G=0.715	2e-11
rs34722008	Central nucleus volume	37391117	rs34722008	chr4:38659594	A=0.285, G=0.715	4e-12
rs34722008	Body size at age 10	32376654	rs34722008	chr4:38659594	A=0.285, G=0.715	2e-08
rs34722008	Cortical thickness	34560273	rs34722008	chr4:38659594	A=0.285, G=0.715	2e-13
rs34722008	Brain morphology (MOSTest)	35164939	rs34722008	chr4:38659594	A=0.285, G=0.715	8e-15
rs7699124	IDP dMRI TBSS L3 Superior corona radiata R	33875891	rs7699124	chr4:54212467	C=0.687, G=0.313	4e-09
rs2591453	White matter microstructure (mean diusivities)	31666681	rs2591453	chr5:82717885	A=0.396, G=0.604	3e-08
rs2591453	White matter microstructure (radial diusivities)	31666681	rs2591453	chr5:82717885	A=0.396, G=0.604	9e-10
rs2591453	White matter microstructure (radial diusivities)	31666681	rs2591453	chr5:82717885	A=0.396, G=0.604	5e-08
rs2591453	White matter microstructure (mean diusivities)	31666681	rs2591453	chr5:82717885	A=0.396, G=0.604	4e-08
rs2591453	White matter microstructure (mean diusivities)	31666681	rs2591453	chr5:82717885	A=0.396, G=0.604	7e-11
rs2591453	White matter microstructure (mean diusivities)	31666681	rs2591453	chr5:82717885	A=0.396, G=0.604	1e-09
rs2591453	White matter microstructure (mean diusivities)	31666681	rs2591453	chr5:82717885	A=0.396, G=0.604	5e-09
rs2591453	White matter microstructure (mean diusivities)	31666681	rs2591453	chr5:82717885	A=0.396, G=0.604	2e-10
rs2591453	White matter microstructure (mean diusivities)	31666681	rs2591453	chr5:82717885	A=0.396, G=0.604	1e-08
rs112563428	Hip index	34021172	rs112563428	chr6:34800435	C=0.899, T=0.101	3e-10
rs112563428	Total cholesterol levels in very large HDL	38448586	rs112563428	chr6:34800435	C=0.899, T=0.101	2e-09
rs112563428	Free cholesterol in very large HDL	38448586	rs112563428	chr6:34800435	C=0.899, T=0.101	3e-10
rs112563428	Total cholesterol levels in HDL	38448586	rs112563428	chr6:34800435	C=0.899, T=0.101	7e-20
rs112563428	Free cholesterol to total lipids ratio in IDL	38448586	rs112563428	chr6:34800435	C=0.899, T=0.101	2e-09
rs112563428	Total cholesterol in HDL3	38448586	rs112563428	chr6:34800435	C=0.899, T=0.101	6e-11
rs112563428	Total cholesterol in HDL2	38448586	rs112563428	chr6:34800435	C=0.899, T=0.101	3e-19
rs112563428	Total lipids in large HDL	38448586	rs112563428	chr6:34800435	C=0.899, T=0.101	1e-15
rs112563428	Concentration of large HDL particles	38448586	rs112563428	chr6:34800435	C=0.899, T=0.101	8e-16
rs112563428	Free cholesterol to total lipids ratio in medium HDL	38448586	rs112563428	chr6:34800435	C=0.899, T=0.101	2e-11
rs112563428	Gamma glutamyl transpeptidase	34594039	rs112563428	chr6:34800435	C=0.899, T=0.101	7e-18
rs112563428	Phospholipids in very large HDL	38448586	rs112563428	chr6:34800435	C=0.899, T=0.101	6e-12
rs112563428	Concentration of very large HDL particles	38448586	rs112563428	chr6:34800435	C=0.899, T=0.101	1e-11
rs112563428	Total lipids in very large HDL	38448586	rs112563428	chr6:34800435	C=0.899, T=0.101	1e-11
rs10237233	Brain morphology (MOSTest)	32665545	rs10237233	chr7:117614923	A=0.602, C=0.398	5e-15
rs740600	Edge-level brain connectivity (multivariate analysis)	36800424	rs740600	chr10:118651882	C=0.736, T=0.264	2e-44
rs740600	Cortical thickness	34560273	rs740600	chr10:118651882	C=0.736, T=0.264	1e-17
rs740600	Vertex-wise cortical thickness	34910505	rs740600	chr10:118651882	C=0.736, T=0.264	5e-34
rs740600	Height	36224396	rs740600	chr10:118651882	C=0.736, T=0.264	2e-12
rs12800954	White matter microstructure (axial diusivities)	31666681	rs12800954	chr11:10494132	A=0.799, G=0.201	6e-11
rs73178508	White matter microstructure (axial diusivities)	31666681	rs73178508	chr12:102300977	C=0.892, T=0.108	2e-08
rs62125958	Vertex-wise sulcal depth	34910505	rs62125958	chr19:3289081	G=0.885, T=0.115	2e-20
rs1446468	Blood pressure	21909110	rs1446468	chr2:164963486	C=0.512, T=0.488	6e-12
rs1446468	Diastolic blood pressure	28739976	rs1446468	chr2:164963486	C=0.512, T=0.488	2e-11
rs1446468	Systolic blood pressure	28739976	rs1446468	chr2:164963486	C=0.512, T=0.488	3e-13
rs1446468	Diastolic blood pressure (cigarette smoking interaction)	29455858	rs1446468	chr2:164963486	C=0.512, T=0.488	2e-23
rs1446468	Systolic blood pressure (cigarette smoking interaction)	29455858	rs1446468	chr2:164963486	C=0.512, T=0.488	1e-34
rs1446468	Mean arterial pressure	26390057	rs1446468	chr2:164963486	C=0.512, T=0.488	2e-06
rs1446468	Immunoglobulin A vasculitis	28698626	rs1446468	chr2:164963486	C=0.512, T=0.488	6e-06
rs1446468	Systolic blood pressure	30487518	rs1446468	chr2:164963486	C=0.512, T=0.488	2e-08
rs1446468	Diastolic blood pressure	30487518	rs1446468	chr2:164963486	C=0.512, T=0.488	5e-06
rs1446468	Mean arterial pressure	30487518	rs1446468	chr2:164963486	C=0.512, T=0.488	6e-08
rs1446468	Pulse pressure	35762941	rs1446468	chr2:164963486	C=0.512, T=0.488	2e-18
rs1446468	Medication use for hypertension (number of purchases)	36653479	rs1446468	chr2:164963486	C=0.512, T=0.488	3e-31
rs4150197	White matter microstructure (radial diusivities)	31666681	rs4150197	chr5:139726292	C=0.755, T=0.245	4e-17
rs4150197	White matter microstructure (fractional anisotropy)	31666681	rs4150197	chr5:139726292	C=0.755, T=0.245	7e-16
rs4150197	IDP dMRI TBSS MD Genu of corpus callosum	33875891	rs4150197	chr5:139726292	C=0.755, T=0.245	7e-14
rs4150197	IDP dMRI TBSS ICVF Posterior limb of internal capsule R	33875891	rs4150197	chr5:139726292	C=0.755, T=0.245	1e-16
rs4150197	IDP dMRI TBSS FA Genu of corpus callosum	33875891	rs4150197	chr5:139726292	C=0.755, T=0.245	8e-12
rs4150197	IDP dMRI TBSS L3 Genu of corpus callosum	33875891	rs4150197	chr5:139726292	C=0.755, T=0.245	1e-11
rs4150197	IDP dMRI TBSS L3 Splenium of corpus callosum	33875891	rs4150197	chr5:139726292	C=0.755, T=0.245	9e-20
rs4150197	IDP dMRI TBSS ICVF Superior longitudinal fasciculus R	33875891	rs4150197	chr5:139726292	C=0.755, T=0.245	2e-10
rs4150197	IDP dMRI ProbtrackX ICVF cgc l	33875891	rs4150197	chr5:139726292	C=0.755, T=0.245	2e-13
rs4150197	IDP dMRI ProbtrackX ICVF cgc r	33875891	rs4150197	chr5:139726292	C=0.755, T=0.245	2e-08
rs4150197	IDP dMRI TBSS ICVF Cingulum cingulate gyrus R	33875891	rs4150197	chr5:139726292	C=0.755, T=0.245	5e-09
rs4150197	IDP dMRI TBSS ICVF Cingulum cingulate gyrus L	33875891	rs4150197	chr5:139726292	C=0.755, T=0.245	5e-12
rs4150197	IDP dMRI TBSS L2 Genu of corpus callosum	33875891	rs4150197	chr5:139726292	C=0.755, T=0.245	1e-13
rs4150197	IDP dMRI TBSS ICVF Genu of corpus callosum	33875891	rs4150197	chr5:139726292	C=0.755, T=0.245	4e-39
rs4150197	IDP dMRI TBSS ICVF Splenium of corpus callosum	33875891	rs4150197	chr5:139726292	C=0.755, T=0.245	2e-32
rs4150197	IDP dMRI ProbtrackX L2 fmi	33875891	rs4150197	chr5:139726292	C=0.755, T=0.245	2e-12
rs4150197	Corpus callosum fractional anisotropy (splenium)	37164063	rs4150197	chr5:139726292	C=0.755, T=0.245	2e-23
rs4150197	Corpus callosum fractional anisotropy (MOSTest)	37164063	rs4150197	chr5:139726292	C=0.755, T=0.245	1e-26
rs10120688	White matter microstructure (mean diusivities)	31666681	rs10120688	chr9:22056499	A=0.499, G=0.501	1e-08
rs10120688	White matter microstructure (radial diusivities)	31666681	rs10120688	chr9:22056499	A=0.499, G=0.501	1e-08
rs10120688	White matter microstructure (mean diusivities)	31666681	rs10120688	chr9:22056499	A=0.499, G=0.501	1e-08
rs10120688	White matter microstructure (fractional anisotropy)	31666681	rs10120688	chr9:22056499	A=0.499, G=0.501	5e-12
rs10120688	White matter microstructure (radial diusivities)	31666681	rs10120688	chr9:22056499	A=0.499, G=0.501	2e-12
rs10120688	IDP dMRI TBSS FA Splenium of corpus callosum	33875891	rs10120688	chr9:22056499	A=0.499, G=0.501	1e-10
rs10120688	IDP dMRI ProbtrackX ICVF fmi	33875891	rs10120688	chr9:22056499	A=0.499, G=0.501	2e-11
rs10120688	IDP dMRI TBSS ICVF Genu of corpus callosum	33875891	rs10120688	chr9:22056499	A=0.499, G=0.501	6e-18
rs10120688	Corpus callosum fractional anisotropy (MOSTest)	37164063	rs10120688	chr9:22056499	A=0.499, G=0.501	8e-17
rs3789283	Precuneus area (unadjusted for global measures)	36893272	rs3789283	chr9:118959731	A=0.582, G=0.418	7e-10
rs3789283	Orbitofrontal area (unadjusted for global measures)	36893272	rs3789283	chr9:118959731	A=0.582, G=0.418	6e-10
rs3789283	Inferior parietal area (unadjusted for global measures)	36893272	rs3789283	chr9:118959731	A=0.582, G=0.418	2e-08
rs112123127	IDP dMRI TBSS MD Anterior limb of internal capsule R	33875891	rs112123127	chr17:43785098	C=0.763, T=0.237	8e-14
rs6907508	White matter microstructure (mean diusivities)	31666681	rs6907508	chr6:34592090	A=0.899, G=0.101	2e-08
rs6907508	Apolipoprotein B levels	32203549	rs6907508	chr6:34592090	A=0.899, G=0.101	2e-17
rs6907508	Subcortical volume (MOSTest)	32665545	rs6907508	chr6:34592090	A=0.899, G=0.101	4e-08
rs6907508	Multisite chronic pain	33830993	rs6907508	chr6:34592090	A=0.899, G=0.101	3e-08
rs6907508	HDL cholesterol levels x alcohol consumption (drinkers vs non-drinkers) interaction (2df)	30698716	rs6907508	chr6:34592090	A=0.899, G=0.101	6e-13
rs6907508	HDL cholesterol levels in current drinkers	30698716	rs6907508	chr6:34592090	A=0.899, G=0.101	9e-06
rs6907508	LDL cholesterol levels x alcohol consumption (regular vs non-regular drinkers) interaction (2df)	30698716	rs6907508	chr6:34592090	A=0.899, G=0.101	4e-07
rs6907508	HDL cholesterol levels x alcohol consumption (drinkers vs non-drinkers) interaction (2df)	30698716	rs6907508	chr6:34592090	A=0.899, G=0.101	1e-12
rs6907508	HDL cholesterol levels x alcohol consumption (regular vs non-regular drinkers) interaction (2df)	30698716	rs6907508	chr6:34592090	A=0.899, G=0.101	2e-10
rs6907508	HDL cholesterol levels	30698716	rs6907508	chr6:34592090	A=0.899, G=0.101	4e-07
rs6907508	LDL cholesterol levels x alcohol consumption (drinkers vs non-drinkers) interaction (2df)	30698716	rs6907508	chr6:34592090	A=0.899, G=0.101	3e-09
rs6907508	LDL cholesterol levels x alcohol consumption (regular vs non-regular drinkers) interaction (2df)	30698716	rs6907508	chr6:34592090	A=0.899, G=0.101	1e-08
rs6907508	HDL cholesterol levels in current drinkers	30698716	rs6907508	chr6:34592090	A=0.899, G=0.101	6e-06
rs6907508	LDL cholesterol levels x alcohol consumption (drinkers vs non-drinkers) interaction (2df)	30698716	rs6907508	chr6:34592090	A=0.899, G=0.101	2e-07
rs6907508	HDL cholesterol levels x alcohol consumption (regular vs non-regular drinkers) interaction (2df)	30698716	rs6907508	chr6:34592090	A=0.899, G=0.101	8e-10
rs6907508	LDL cholesterol	30275531	rs6907508	chr6:34592090	A=0.899, G=0.101	3e-08
rs6907508	Multisite chronic pain	31194737	rs6907508	chr6:34592090	A=0.899, G=0.101	1e-08
rs6907508	Apolipoprotein A-I levels	38448586	rs6907508	chr6:34592090	A=0.899, G=0.101	2e-22
rs6907508	Cholesterol esters in medium HDL	38448586	rs6907508	chr6:34592090	A=0.899, G=0.101	5e-12
rs6907508	Free cholesterol in medium HDL	38448586	rs6907508	chr6:34592090	A=0.899, G=0.101	1e-12
rs6907508	Concentration of medium HDL particles	38448586	rs6907508	chr6:34592090	A=0.899, G=0.101	2e-12
rs6907508	Phospholipids in medium HDL	38448586	rs6907508	chr6:34592090	A=0.899, G=0.101	2e-13
rs6907508	Total lipids in medium HDL	38448586	rs6907508	chr6:34592090	A=0.899, G=0.101	1e-12
rs6907508	Total cholesterol levels in medium HDL	38448586	rs6907508	chr6:34592090	A=0.899, G=0.101	2e-12
rs6907508	Total cholesterol levels	34594039	rs6907508	chr6:34592090	A=0.899, G=0.101	7e-21
rs6907508	Back pain	30747904	rs6907508	chr6:34592090	A=0.899, G=0.101	3e-10
rs6907508	Gamma glutamyl transferase levels	38632349	rs6907508	chr6:34592090	A=0.899, G=0.101	1e-26
rs6907508	Aging	37550455	rs6907508	chr6:34592090	A=0.899, G=0.101	2e-09
rs2402273	White matter microstructure (axial diusivities)	31666681	rs2402273	chr7:117600424	C=0.399, T=0.601	1e-10
rs2402273	IDP dMRI TBSS L1 Genu of corpus callosum	33875891	rs2402273	chr7:117600424	C=0.399, T=0.601	5e-10
rs2402273	IDP dMRI TBSS ISOVF Genu of corpus callosum	33875891	rs2402273	chr7:117600424	C=0.399, T=0.601	1e-09
rs2402273	Depression (broad)	29662059	rs2402273	chr7:117600424	C=0.399, T=0.601	2e-09
rs2402273	Corpus callosum volume (MOSTest)	37164063	rs2402273	chr7:117600424	C=0.399, T=0.601	2e-12
rs2402273	Left-hemisphere limbic network to right-hemisphere default mode network white-matter structural connectivity	38438384	rs2402273	chr7:117600424	C=0.399, T=0.601	7e-09
rs6984820	Subcortical volume (MOSTest)	32665545	rs6984820	chr8:144993324	C=0.577, T=0.423	4e-08
rs6984820	Post bronchodilator FEV1	26634245	rs6984820	chr8:144993324	C=0.577, T=0.423	5e-06
rs6984820	Corpus callosum central volume	37164063	rs6984820	chr8:144993324	C=0.577, T=0.423	2e-08
rs1416823	Cortical thickness	34560273	rs1416823	chr1:180496582	A=0.293, G=0.707	1e-11
rs1416823	Vertex-wise sulcal depth	34910505	rs1416823	chr1:180496582	A=0.293, G=0.707	3e-23
rs1416823	Vertex-wise cortical thickness	34910505	rs1416823	chr1:180496582	A=0.293, G=0.707	9e-11
rs17443495	Regional cortical thickness (precuneus)	38890310	rs17443495	chr2:37117502	C=0.428, G=0.572	2e-10
rs17443495	Regional cortical thickness (rostralmiddlefrontal)	38890310	rs17443495	chr2:37117502	C=0.428, G=0.572	7e-09
rs1182155	Whole body fat free mass (UKB data field 23101)	38538606	rs1182155	chr7:2902890	C=0.303, G=0.697	1e-39
rs10282032	Depression (broad)	36750733	rs10282032	chr7:117628555	C=0.6, T=0.4	6e-06
rs6554068	IDP dMRI TBSS ICVF Sagittal stratum L	33875891	rs6554068	chr4:54032319	A=0.667, G=0.333	4e-12
rs6554068	IDP dMRI TBSS L3 Superior longitudinal fasciculus R	33875891	rs6554068	chr4:54032319	A=0.667, G=0.333	7e-10
rs6554068	IDP dMRI TBSS ICVF Superior longitudinal fasciculus R	33875891	rs6554068	chr4:54032319	A=0.667, G=0.333	7e-15
rs6554068	IDP dMRI ProbtrackX ICVF ilf l	33875891	rs6554068	chr4:54032319	A=0.667, G=0.333	4e-13
rs6554068	IDP dMRI ProbtrackX ICVF cst l	33875891	rs6554068	chr4:54032319	A=0.667, G=0.333	4e-11
rs6554068	IDP dMRI ProbtrackX ICVF ifo l	33875891	rs6554068	chr4:54032319	A=0.667, G=0.333	2e-13
rs6554068	IDP dMRI TBSS MD Superior longitudinal fasciculus R	33875891	rs6554068	chr4:54032319	A=0.667, G=0.333	3e-09
rs6554068	IDP dMRI TBSS ICVF Genu of corpus callosum	33875891	rs6554068	chr4:54032319	A=0.667, G=0.333	3e-13
rs6554068	IDP dMRI TBSS ICVF Body of corpus callosum	33875891	rs6554068	chr4:54032319	A=0.667, G=0.333	2e-13
rs6554068	IDP dMRI TBSS ICVF Splenium of corpus callosum	33875891	rs6554068	chr4:54032319	A=0.667, G=0.333	4e-10
rs6554068	IDP dMRI ProbtrackX L3 slf r	33875891	rs6554068	chr4:54032319	A=0.667, G=0.333	2e-08
rs6554068	IDP dMRI ProbtrackX ICVF slf l	33875891	rs6554068	chr4:54032319	A=0.667, G=0.333	3e-14
rs6554068	IDP dMRI ProbtrackX ICVF slf r	33875891	rs6554068	chr4:54032319	A=0.667, G=0.333	2e-15
rs3020581	Waist-hip index	34021172	rs3020581	chr6:31351549	A=0.661, G=0.339	1e-12
rs3020581	Waist-to-hip ratio adjusted for BMI	34021172	rs3020581	chr6:31351549	A=0.661, G=0.339	2e-14
rs3020581	A body shape index	34021172	rs3020581	chr6:31351549	A=0.661, G=0.339	6e-18
rs3020581	Alanine aminotransferase levels	38632349	rs3020581	chr6:31351549	A=0.661, G=0.339	7e-11
rs2713546	DTI TBSS FA Uncinate fasciculus R	38811844	rs2713546	chr2:227177546	A=0.452, C=0.548	2e-07
rs263071	White matter microstructure (fractional anisotropy)	31666681	rs263071	chr4:96906564	A=0.804, T=0.196	3e-09
rs263071	Brain shape (segment 20)	33821002	rs263071	chr4:96906564	A=0.804, T=0.196	3e-13
rs13121156	Cortical surface area	34560273	rs13121156	chr4:97918159	C=0.277, T=0.723	9e-10
rs13121156	Vertex-wise cortical surface area	34910505	rs13121156	chr4:97918159	C=0.277, T=0.723	9e-09
rs12707607	White matter microstructure (axial diusivities)	31666681	rs12707607	chr7:83697483	A=0.314, G=0.686	7e-09
rs12707607	Brain region volumes	31676860	rs12707607	chr7:83697483	A=0.314, G=0.686	2e-08
rs12711472	Subcortical volume (MOSTest)	32665545	rs12711472	chr16:87224132	A=0.409, C=0.591	1e-28
rs12711472	Vertex-wise sulcal depth	34910505	rs12711472	chr16:87224132	A=0.409, C=0.591	4.94065645841247e-324
rs12711472	Vertex-wise sulcal depth	34910505	rs12711472	chr16:87224132	A=0.409, C=0.591	3e-09
rs12711472	Vertex-wise sulcal depth	34910505	rs12711472	chr16:87224132	A=0.409, C=0.591	3e-13
rs4731368	Intelligence (MTAG)	29326435	rs4731368	chr7:127180667	A=0.213, G=0.787	2e-09
rs4731368	Intelligence	29942086	rs4731368	chr7:127180667	A=0.213, G=0.787	2e-08
rs3088186	Bipolar disorder	34002096	rs3088186	chr8:10226355	C=0.722, T=0.278	2e-08
rs3088186	Schizophrenia	31740837	rs3088186	chr8:10226355	C=0.722, T=0.278	4e-09
rs35522344	Subcortical volume (MOSTest)	32665545	rs35522344	chr14:100283856	C=0.597, T=0.403	2e-08
rs35522344	Cortical surface area	34560273	rs35522344	chr14:100283856	C=0.597, T=0.403	1e-17
rs35522344	Vertex-wise sulcal depth	34910505	rs35522344	chr14:100283856	C=0.597, T=0.403	8e-49
rs35522344	Vertex-wise cortical surface area	34910505	rs35522344	chr14:100283856	C=0.597, T=0.403	3e-28
rs35522344	Corpus callosum volume	37164063	rs35522344	chr14:100283856	C=0.597, T=0.403	2e-08
rs2393593	Hip circumference adjusted for BMI	34021172	rs2393593	chr6:26285683	C=0.579, T=0.421	1e-30
rs3790459	Medication use (antimigraine preparations)	34594039	rs3790459	chr1:156461707	A=0.329, T=0.671	4e-09
rs3790459	Alanine aminotransferase levels	38632349	rs3790459	chr1:156461707	A=0.329, T=0.671	6e-14
rs1024905	Migraine without aura	27322543	rs1024905	chr12:4518140	C=0.529, G=0.471	3e-09
rs1024905	Migraine	27322543	rs1024905	chr12:4518140	C=0.529, G=0.471	2e-17
rs4685022	wg lh intensity-contrast precuneus	33875891	rs4685022	chr3:13832611	A=0.34, G=0.66	1e-12
rs4685022	wg lh intensity-contrast fusiform	33875891	rs4685022	chr3:13832611	A=0.34, G=0.66	4e-15
rs4685022	wg lh intensity-contrast inferiortemporal	33875891	rs4685022	chr3:13832611	A=0.34, G=0.66	2e-15
rs4685022	wg rh intensity-contrast precuneus	33875891	rs4685022	chr3:13832611	A=0.34, G=0.66	2e-12
rs4685022	wg rh intensity-contrast superiorparietal	33875891	rs4685022	chr3:13832611	A=0.34, G=0.66	4e-11
rs4685022	Whole brain restricted isotropic diffusion (multivariate analysis)	35505052	rs4685022	chr3:13832611	A=0.34, G=0.66	7e-18
rs4685022	Cortical surface area	34560273	rs4685022	chr3:13832611	A=0.34, G=0.66	2e-09
rs4685022	Regional cortical thickness (postcentral)	38890310	rs4685022	chr3:13832611	A=0.34, G=0.66	7e-09
rs4685022	Regional cortical thickness (lateralorbitofrontal)	38890310	rs4685022	chr3:13832611	A=0.34, G=0.66	2e-08
rs4685022	Global cortical thickness (GlobalMeanMean)	38890310	rs4685022	chr3:13832611	A=0.34, G=0.66	3e-10
rs4685022	Regional cortical thickness (superiorfrontal)	38890310	rs4685022	chr3:13832611	A=0.34, G=0.66	2e-09
rs4685022	Regional cortical thickness (superiorparietal)	38890310	rs4685022	chr3:13832611	A=0.34, G=0.66	8e-10
rs4685022	Regional cortical thickness (inferiorparietal)	38890310	rs4685022	chr3:13832611	A=0.34, G=0.66	1e-09
rs4685022	Extensive white matter perivascular space burden	37069360	rs4685022	chr3:13832611	A=0.34, G=0.66	2e-09
rs7659379	White matter microstructure (fractional anisotropy)	31666681	rs7659379	chr4:97922549	C=0.732, T=0.268	5e-16
rs7659379	IDP dMRI TBSS L2 Uncinate fasciculus L	33875891	rs7659379	chr4:97922549	C=0.732, T=0.268	1e-09
rs755856	Waist circumference adjusted for body mass index	34021172	rs755856	chr8:10736552	C=0.363, G=0.637	4e-11
rs755856	Waist-hip index	34021172	rs755856	chr8:10736552	C=0.363, G=0.637	2e-08
rs755856	A body shape index	34021172	rs755856	chr8:10736552	C=0.363, G=0.637	9e-11
rs7596872	White matter hyperintensity volume	33293549	rs7596872	chr2:56128091	A=0.084, C=0.916	4e-24
rs7596872	Periventricular white matter hyperintensities	32517579	rs7596872	chr2:56128091	A=0.084, C=0.916	9e-11
rs7596872	White matter hyperintensities	32358547	rs7596872	chr2:56128091	A=0.084, C=0.916	2e-20
rs7596872	Inguinal hernia	34382107	rs7596872	chr2:56128091	A=0.084, C=0.916	3e-15
rs7596872	White matter hyperintensity volume	30659137	rs7596872	chr2:56128091	A=0.084, C=0.916	3e-12
rs7596872	Whole brain restricted isotropic diffusion (multivariate analysis)	35505052	rs7596872	chr2:56128091	A=0.084, C=0.916	6e-19
rs7596872	Whole brain free water diffusion (multivariate analysis)	35505052	rs7596872	chr2:56128091	A=0.084, C=0.916	2e-30
rs7596872	White matter hyperintensities	38890310	rs7596872	chr2:56128091	A=0.084, C=0.916	1e-18
rs7596872	Extensive white matter perivascular space burden	37069360	rs7596872	chr2:56128091	A=0.084, C=0.916	1e-10
rs13437444	White matter microstructure (mean diusivities)	31666681	rs13437444	chr6:28070998	C=0.843, T=0.157	4e-09
rs13437444	White matter microstructure (mean diusivities)	31666681	rs13437444	chr6:28070998	C=0.843, T=0.157	3e-09
rs13437444	White matter microstructure (axial diusivities)	31666681	rs13437444	chr6:28070998	C=0.843, T=0.157	5e-09
rs275350	Periventricular white matter hyperintensities	32517579	rs275350	chr6:151016058	C=0.438, G=0.562	5e-11
rs275350	White matter hyperintensities	32358547	rs275350	chr6:151016058	C=0.438, G=0.562	9e-17
rs275350	IDP T1 FAST ROIs L caudate	33875891	rs275350	chr6:151016058	C=0.438, G=0.562	1e-10
rs275350	IDP dMRI TBSS ISOVF Posterior corona radiata L	33875891	rs275350	chr6:151016058	C=0.438, G=0.562	2e-09
rs275350	aseg global volume WM-hypointensities	33875891	rs275350	chr6:151016058	C=0.438, G=0.562	5e-13
rs275350	White matter hyperintensity volume	30659137	rs275350	chr6:151016058	C=0.438, G=0.562	2e-09
rs275350	Whole brain free water diffusion (multivariate analysis)	35505052	rs275350	chr6:151016058	C=0.438, G=0.562	3e-18
rs275350	Node-level brain connectivity (multivariate analysis)	36800424	rs275350	chr6:151016058	C=0.438, G=0.562	7e-09
rs275350	Vertex-wise cortical surface area	34910505	rs275350	chr6:151016058	C=0.438, G=0.562	5e-10
rs275350	Vertex-wise cortical thickness	34910505	rs275350	chr6:151016058	C=0.438, G=0.562	2e-16
rs275350	White matter hyperintensities	38890310	rs275350	chr6:151016058	C=0.438, G=0.562	9e-14
rs275350	Regional cortical thickness (superiorparietal)	38890310	rs275350	chr6:151016058	C=0.438, G=0.562	6e-09
rs275350	Superior parietal thickness (unadjusted for global measures)	36893272	rs275350	chr6:151016058	C=0.438, G=0.562	7e-09
rs275350	Fornix white matter microstructure (intra-cellular volume fraction)	37236919	rs275350	chr6:151016058	C=0.438, G=0.562	2e-09
rs181292	White matter microstructure (axial diusivities)	31666681	rs181292	chr8:28543625	C=0.291, T=0.709	4e-08
rs7112321	IDP dMRI TBSS MO Posterior limb of internal capsule R	33875891	rs7112321	chr11:10471218	C=0.54, T=0.46	2e-13
rs12711473	White matter microstructure (axial diusivities)	31666681	rs12711473	chr16:87224293	A=0.409, G=0.591	7e-14
rs12711473	Edge-level brain connectivity (multivariate analysis)	36800424	rs12711473	chr16:87224293	A=0.409, G=0.591	3e-62
rs12711473	Corpus callosum mid-anterior volume	37164063	rs12711473	chr16:87224293	A=0.409, G=0.591	2e-09
rs12711473	T1 FreeSurfer aseg 4th-Ventricle	38811844	rs12711473	chr16:87224293	A=0.409, G=0.591	6e-06
rs7549876	IDP dMRI ProbtrackX FA ar r	33875891	rs7549876	chr1:43760236	G=0.634, T=0.366	5e-09
rs7549876	White blood cell count	30595370	rs7549876	chr1:43760236	G=0.634, T=0.366	6e-09
rs34421054	IDP dMRI TBSS ISOVF Sagittal stratum R	33875891	rs34421054	chr12:118437058	C=0.734, T=0.266	6e-12
rs4843560	White matter microstructure (fractional anisotropy)	31666681	rs4843560	chr16:87225143	A=0.41, G=0.59	7e-12
rs4843560	Brain region volumes	31676860	rs4843560	chr16:87225143	A=0.41, G=0.59	1e-16
rs4843560	Cortical surface area (MOSTest)	32665545	rs4843560	chr16:87225143	A=0.41, G=0.59	2e-29
rs4843560	IDP dMRI TBSS OD Superior corona radiata L	33875891	rs4843560	chr16:87225143	A=0.41, G=0.59	4e-14
rs4843560	Cortical surface area	34560273	rs4843560	chr16:87225143	A=0.41, G=0.59	1e-17
rs4843560	Vertex-wise cortical surface area	34910505	rs4843560	chr16:87225143	A=0.41, G=0.59	1e-159
rs4843560	Vertex-wise cortical surface area	34910505	rs4843560	chr16:87225143	A=0.41, G=0.59	8e-08
rs4843560	Corpus callosum central volume	37164063	rs4843560	chr16:87225143	A=0.41, G=0.59	3e-10
rs760975	IDP dMRI TBSS L3 Sagittal stratum L	33875891	rs760975	chr22:38467784	C=0.605, G=0.395	1e-09
rs760975	IDP dMRI ProbtrackX ICVF cgc r	33875891	rs760975	chr22:38467784	C=0.605, G=0.395	3e-10
rs760975	IDP dMRI ProbtrackX ICVF ilf r	33875891	rs760975	chr22:38467784	C=0.605, G=0.395	4e-09
rs554632245	Cortical thickness	34560273	rs554632245	chr3:183374693	A=0.229, G=0.771	3e-09
rs554632245	Vertex-wise cortical thickness	34910505	rs554632245	chr3:183374693	A=0.229, G=0.771	3e-08
rs79569934	IDP dMRI ProbtrackX ICVF ml r	33875891	rs79569934	chr19:5900471	C=0.877, T=0.123	9e-09
rs59731356	White matter microstructure (mean diusivities)	31666681	rs59731356	chr22:30764664	C=0.34, T=0.66	1e-08
rs59731356	White matter microstructure (mean diusivities)	31666681	rs59731356	chr22:30764664	C=0.34, T=0.66	7e-09
rs59731356	White matter microstructure (fractional anisotropy)	31666681	rs59731356	chr22:30764664	C=0.34, T=0.66	2e-09
rs59731356	White matter microstructure (fractional anisotropy)	31666681	rs59731356	chr22:30764664	C=0.34, T=0.66	4e-08
rs59731356	White matter microstructure (radial diusivities)	31666681	rs59731356	chr22:30764664	C=0.34, T=0.66	8e-09
rs59731356	White matter microstructure (radial diusivities)	31666681	rs59731356	chr22:30764664	C=0.34, T=0.66	1e-09
rs59731356	White matter microstructure (radial diusivities)	31666681	rs59731356	chr22:30764664	C=0.34, T=0.66	2e-08
rs59731356	Abdominal aortic aneurysm	37845353	rs59731356	chr22:30764664	C=0.34, T=0.66	8e-12
rs742396	IDP dMRI TBSS MD Sagittal stratum R	33875891	rs742396	chr22:38452254	C=0.388, G=0.612	2e-08
rs742396	IDP T1 SIENAX white normalised volume	33875891	rs742396	chr22:38452254	C=0.388, G=0.612	1e-09
rs742396	IDP T1 SIENAX white unnormalised volume	33875891	rs742396	chr22:38452254	C=0.388, G=0.612	9e-10
rs742396	IDP dMRI TBSS L3 Sagittal stratum R	33875891	rs742396	chr22:38452254	C=0.388, G=0.612	9e-11
rs742396	aseg rh volume CerebralWhiteMatter	33875891	rs742396	chr22:38452254	C=0.388, G=0.612	2e-12
rs742396	aseg lh volume CerebralWhiteMatter	33875891	rs742396	chr22:38452254	C=0.388, G=0.612	4e-12
rs742396	Brain morphology (MOSTest)	35164939	rs742396	chr22:38452254	C=0.388, G=0.612	4e-18
rs3789586	Body mass index	36581621	rs3789586	chr1:51054322	C=0.85, T=0.15	2e-10
rs368699386	White matter microstructure (fractional anisotropy)	31666681	rs368699386	chr7:2803883	C=0.256, T=0.744	7e-10
rs368699386	White matter microstructure (mode of anisotropy)	31666681	rs368699386	chr7:2803883	C=0.256, T=0.744	1e-08
rs368699386	Brain region volumes	31676860	rs368699386	chr7:2803883	C=0.256, T=0.744	1e-15
rs368699386	Brain region volumes	31676860	rs368699386	chr7:2803883	C=0.256, T=0.744	2e-13
rs368699386	Right-hemisphere limbic network to putamen white-matter structural connectivity	38438384	rs368699386	chr7:2803883	C=0.256, T=0.744	1e-08
rs1861881	Migraine and/or diastolic blood pressure	32632093	rs1861881	chr9:119312256	G=0.684, T=0.316	2e-13
rs1861881	Diastolic blood pressure	30224653	rs1861881	chr9:119312256	G=0.684, T=0.316	7e-10
rs11012732	Lung function (FVC)	30595370	rs11012732	chr10:21830104	A=0.648, G=0.352	1e-10
rs11012732	Meningioma	21804547	rs11012732	chr10:21830104	A=0.648, G=0.352	2e-14
rs11012732	Body mass index	31669095	rs11012732	chr10:21830104	A=0.648, G=0.352	5e-25
rs11012732	IDP dMRI TBSS MD Fornix	33875891	rs11012732	chr10:21830104	A=0.648, G=0.352	2e-10
rs11012732	IDP dMRI TBSS L3 Fornix	33875891	rs11012732	chr10:21830104	A=0.648, G=0.352	3e-10
rs11012732	IDP dMRI TBSS L2 Fornix	33875891	rs11012732	chr10:21830104	A=0.648, G=0.352	2e-10
rs11012732	Body mass index	30595370	rs11012732	chr10:21830104	A=0.648, G=0.352	2e-25
rs11012732	Body fat percentage	33980691	rs11012732	chr10:21830104	A=0.648, G=0.352	2e-24
rs11012732	C-reactive protein levels	35459240	rs11012732	chr10:21830104	A=0.648, G=0.352	8e-13
rs11012732	C-reactive protein levels	31900758	rs11012732	chr10:21830104	A=0.648, G=0.352	1e-09
rs11012732	Serum albumin levels	34594039	rs11012732	chr10:21830104	A=0.648, G=0.352	4e-19
rs11012732	Aspartate aminotransferase levels	33980691	rs11012732	chr10:21830104	A=0.648, G=0.352	3e-07
rs11012732	Metabolic biomarkers (multivariate analysis)	33980691	rs11012732	chr10:21830104	A=0.648, G=0.352	1e-21
rs11012732	Body mass index	34594039	rs11012732	chr10:21830104	A=0.648, G=0.352	4e-20
rs11012732	Whole body fat mass (UKB data field 23100)	38538606	rs11012732	chr10:21830104	A=0.648, G=0.352	5e-19
rs11012732	C-reactive protein levels (MTAG)	36376304	rs11012732	chr10:21830104	A=0.648, G=0.352	6e-13
rs11012732	Body mass index	37280435	rs11012732	chr10:21830104	A=0.648, G=0.352	6e-24
rs11012732	Body mass index	38538606	rs11012732	chr10:21830104	A=0.648, G=0.352	7e-18
rs4418728	Caffeine consumption from coffee or tea	33287642	rs4418728	chr10:94839724	G=0.513, T=0.487	7e-10
rs4418728	Triglyceride levels	32154731	rs4418728	chr10:94839724	G=0.513, T=0.487	1e-32
rs4418728	Serum 25-Hydroxyvitamin D levels	32242144	rs4418728	chr10:94839724	G=0.513, T=0.487	1e-09
rs4418728	Serum total protein levels	29403010	rs4418728	chr10:94839724	G=0.513, T=0.487	4e-08
rs4418728	Estimated glomerular filtration rate	30604766	rs4418728	chr10:94839724	G=0.513, T=0.487	1e-08
rs4418728	Diastolic blood pressure	30487518	rs4418728	chr10:94839724	G=0.513, T=0.487	2e-08
rs4418728	Systolic blood pressure	30487518	rs4418728	chr10:94839724	G=0.513, T=0.487	3e-06
rs4418728	Liver enzyme levels (gamma-glutamyl transferase)	33972514	rs4418728	chr10:94839724	G=0.513, T=0.487	3e-29
rs4418728	C-reactive protein levels	35459240	rs4418728	chr10:94839724	G=0.513, T=0.487	4e-16
rs4418728	HDL cholesterol levels x alcohol consumption (drinkers vs non-drinkers) interaction (2df)	30698716	rs4418728	chr10:94839724	G=0.513, T=0.487	3e-06
rs4418728	HDL cholesterol levels x alcohol consumption (drinkers vs non-drinkers) interaction (2df)	30698716	rs4418728	chr10:94839724	G=0.513, T=0.487	6e-09
rs4418728	HDL cholesterol levels x alcohol consumption (drinkers vs non-drinkers) interaction (2df)	30698716	rs4418728	chr10:94839724	G=0.513, T=0.487	6e-17
rs4418728	Triglyceride levels	30698716	rs4418728	chr10:94839724	G=0.513, T=0.487	7e-12
rs4418728	Triglyceride levels	30698716	rs4418728	chr10:94839724	G=0.513, T=0.487	2e-18
rs4418728	Mean arterial pressure	30487518	rs4418728	chr10:94839724	G=0.513, T=0.487	1e-07
rs4418728	HDL cholesterol levels x alcohol consumption (drinkers vs non-drinkers) interaction (2df)	30698716	rs4418728	chr10:94839724	G=0.513, T=0.487	2e-06
rs4418728	Triglyceride levels x alcohol consumption (drinkers vs non-drinkers) interaction (2df)	30698716	rs4418728	chr10:94839724	G=0.513, T=0.487	7e-27
rs4418728	Triglyceride levels x alcohol consumption (drinkers vs non-drinkers) interaction (2df)	30698716	rs4418728	chr10:94839724	G=0.513, T=0.487	2e-12
rs4418728	Triglyceride levels x alcohol consumption (drinkers vs non-drinkers) interaction (2df)	30698716	rs4418728	chr10:94839724	G=0.513, T=0.487	4e-13
rs4418728	HDL cholesterol levels in current drinkers	30698716	rs4418728	chr10:94839724	G=0.513, T=0.487	4e-06
rs4418728	Triglyceride levels in current drinkers	30698716	rs4418728	chr10:94839724	G=0.513, T=0.487	8e-07
rs4418728	LDL cholesterol levels x alcohol consumption (regular vs non-regular drinkers) interaction (2df)	30698716	rs4418728	chr10:94839724	G=0.513, T=0.487	9e-07
rs4418728	Triglyceride levels x alcohol consumption (regular vs non-regular drinkers) interaction (2df)	30698716	rs4418728	chr10:94839724	G=0.513, T=0.487	4e-12
rs4418728	Triglyceride levels in current drinkers	30698716	rs4418728	chr10:94839724	G=0.513, T=0.487	8e-19
rs4418728	Triglyceride levels in current drinkers	30698716	rs4418728	chr10:94839724	G=0.513, T=0.487	1e-11
rs4418728	HDL cholesterol levels x alcohol consumption (regular vs non-regular drinkers) interaction (2df)	30698716	rs4418728	chr10:94839724	G=0.513, T=0.487	4e-06
rs4418728	HDL cholesterol levels x alcohol consumption (regular vs non-regular drinkers) interaction (2df)	30698716	rs4418728	chr10:94839724	G=0.513, T=0.487	1e-08
rs4418728	LDL cholesterol levels in current drinkers	30698716	rs4418728	chr10:94839724	G=0.513, T=0.487	7e-06
rs4418728	LDL cholesterol levels x alcohol consumption (drinkers vs non-drinkers) interaction (2df)	30698716	rs4418728	chr10:94839724	G=0.513, T=0.487	6e-11
rs4418728	LDL cholesterol levels x alcohol consumption (regular vs non-regular drinkers) interaction (2df)	30698716	rs4418728	chr10:94839724	G=0.513, T=0.487	1e-08
rs4418728	Triglyceride levels x alcohol consumption (regular vs non-regular drinkers) interaction (2df)	30698716	rs4418728	chr10:94839724	G=0.513, T=0.487	1e-12
rs4418728	Triglyceride levels x alcohol consumption (regular vs non-regular drinkers) interaction (2df)	30698716	rs4418728	chr10:94839724	G=0.513, T=0.487	3e-25
rs4418728	HDL cholesterol levels	30698716	rs4418728	chr10:94839724	G=0.513, T=0.487	2e-09
rs4418728	HDL cholesterol levels x alcohol consumption (regular vs non-regular drinkers) interaction (2df)	30698716	rs4418728	chr10:94839724	G=0.513, T=0.487	4e-06
rs4418728	HDL cholesterol levels x alcohol consumption (regular vs non-regular drinkers) interaction (2df)	30698716	rs4418728	chr10:94839724	G=0.513, T=0.487	1e-16
rs4418728	HDL cholesterol levels in current drinkers	30698716	rs4418728	chr10:94839724	G=0.513, T=0.487	9e-09
rs4418728	LDL cholesterol levels x alcohol consumption (drinkers vs non-drinkers) interaction (2df)	30698716	rs4418728	chr10:94839724	G=0.513, T=0.487	5e-08
rs4418728	Triglycerides x physical activity interaction (2df test)	30670697	rs4418728	chr10:94839724	G=0.513, T=0.487	1e-15
rs4418728	LDL cholesterol	30275531	rs4418728	chr10:94839724	G=0.513, T=0.487	2e-09
rs4418728	Phospholipid levels in very large HDL	35213538	rs4418728	chr10:94839724	G=0.513, T=0.487	4e-12
rs4418728	Phospholipids to total lipids ratio in very large HDL	35213538	rs4418728	chr10:94839724	G=0.513, T=0.487	9e-11
rs4418728	Total lipid levels in very large HDL	35213538	rs4418728	chr10:94839724	G=0.513, T=0.487	5e-12
rs4418728	Concentration of very large HDL particles	35213538	rs4418728	chr10:94839724	G=0.513, T=0.487	3e-10
rs4418728	Citrate levels	35213538	rs4418728	chr10:94839724	G=0.513, T=0.487	6e-10
rs4418728	Total fatty acids	38448586	rs4418728	chr10:94839724	G=0.513, T=0.487	1e-09
rs4418728	Mean diameter of HDL particles	38448586	rs4418728	chr10:94839724	G=0.513, T=0.487	4e-11
rs4418728	Cholesteryl esters to total lipids ratio in large HDL	38448586	rs4418728	chr10:94839724	G=0.513, T=0.487	5e-12
rs4418728	Phospholipids to total lipids ratio in large HDL	38448586	rs4418728	chr10:94839724	G=0.513, T=0.487	2e-11
rs4418728	Cholesterol levels in large HDL	35213538	rs4418728	chr10:94839724	G=0.513, T=0.487	2e-14
rs4418728	Phospholipid levels in large HDL	35213538	rs4418728	chr10:94839724	G=0.513, T=0.487	1e-10
rs4418728	Concentration of large HDL particles	35213538	rs4418728	chr10:94839724	G=0.513, T=0.487	2e-12
rs4418728	Omega-3 fatty acid levels	35213538	rs4418728	chr10:94839724	G=0.513, T=0.487	4e-10
rs4418728	Ratio of omega-6 fatty acids to omega-3 fatty acids	35213538	rs4418728	chr10:94839724	G=0.513, T=0.487	7e-10
rs4418728	Node-level brain connectivity (multivariate analysis)	36800424	rs4418728	chr10:94839724	G=0.513, T=0.487	1e-08
rs4418728	High density lipoprotein cholesterol levels	34887591	rs4418728	chr10:94839724	G=0.513, T=0.487	8e-27
rs4418728	Total lipid levels in large HDL	35213538	rs4418728	chr10:94839724	G=0.513, T=0.487	5e-12
rs4418728	Free cholesterol levels in large HDL	35213538	rs4418728	chr10:94839724	G=0.513, T=0.487	4e-12
rs4418728	Cholesteryl ester levels in large HDL	35213538	rs4418728	chr10:94839724	G=0.513, T=0.487	7e-15
rs4418728	High density lipoprotein cholesterol levels	34887591	rs4418728	chr10:94839724	G=0.513, T=0.487	2e-10
rs4418728	Triglycerides in medium HDL	38448586	rs4418728	chr10:94839724	G=0.513, T=0.487	2e-14
rs4418728	Gamma glutamyl transpeptidase	34594039	rs4418728	chr10:94839724	G=0.513, T=0.487	1e-31
rs4418728	Phospholipids in very large HDL	38448586	rs4418728	chr10:94839724	G=0.513, T=0.487	1e-12
rs4418728	Saturated fatty acids	38448586	rs4418728	chr10:94839724	G=0.513, T=0.487	8e-10
rs4418728	High density lipoprotein cholesterol levels	34887591	rs4418728	chr10:94839724	G=0.513, T=0.487	3e-46
rs4418728	Triglyceride levels	34887591	rs4418728	chr10:94839724	G=0.513, T=0.487	5e-105
rs4418728	Triglyceride levels	34887591	rs4418728	chr10:94839724	G=0.513, T=0.487	3e-09
rs4418728	Total cholesterol levels	34887591	rs4418728	chr10:94839724	G=0.513, T=0.487	3e-39
rs4418728	Non-HDL cholesterol levels	34887591	rs4418728	chr10:94839724	G=0.513, T=0.487	2e-53
rs4418728	Tea intake (UKB data field 1488)	32193382	rs4418728	chr10:94839724	G=0.513, T=0.487	1e-08
rs4418728	Low-density lipoprotein levels (MTAG)	36376304	rs4418728	chr10:94839724	G=0.513, T=0.487	8e-24
rs4418728	Triglyceride levels	36333282	rs4418728	chr10:94839724	G=0.513, T=0.487	1e-31
rs4418728	HDL cholesterol levels	36333282	rs4418728	chr10:94839724	G=0.513, T=0.487	7e-23
rs4418728	Triglyceride levels (MTAG)	36376304	rs4418728	chr10:94839724	G=0.513, T=0.487	6e-38
rs4418728	Omega-3 fatty acids levels (UKB data field 23444)	36764567	rs4418728	chr10:94839724	G=0.513, T=0.487	9e-10
rs4418728	Total bilirubin levels	38116116	rs4418728	chr10:94839724	G=0.513, T=0.487	2e-10
rs4418728	Gamma glutamyl transferase levels	38632349	rs4418728	chr10:94839724	G=0.513, T=0.487	1e-29
rs34077344	Brain region volumes	31676860	rs34077344	chr11:111025039	A=0.039, T=0.961	2e-10
rs7310615	White matter microstructure (mode of anisotropy)	31666681	rs7310615	chr12:111865049	C=0.465, G=0.535	3e-08
rs7310615	Left ventricular end-diastolic volume	32382064	rs7310615	chr12:111865049	C=0.465, G=0.535	5e-16
rs7310615	Fibrinogen levels	26561523	rs7310615	chr12:111865049	C=0.465, G=0.535	2e-13
rs7310615	Serum levels of protein THPO	35078996	rs7310615	chr12:111865049	C=0.465, G=0.535	5e-17
rs7310615	Systolic blood pressure x alcohol consumption interaction (2df test)	29912962	rs7310615	chr12:111865049	C=0.465, G=0.535	3e-30
rs7310615	Systolic blood pressure x alcohol consumption (light vs heavy) interaction (2df test)	29912962	rs7310615	chr12:111865049	C=0.465, G=0.535	4e-14
rs7310615	Mean arterial pressure x alcohol consumption interaction (2df test)	29912962	rs7310615	chr12:111865049	C=0.465, G=0.535	2e-20
rs7310615	Mean arterial pressure x alcohol consumption interaction (2df test)	29912962	rs7310615	chr12:111865049	C=0.465, G=0.535	3e-16
rs7310615	Mean arterial pressure x alcohol consumption (light vs heavy) interaction (2df test)	29912962	rs7310615	chr12:111865049	C=0.465, G=0.535	5e-20
rs7310615	Diastolic blood pressure x alcohol consumption interaction (2df test)	29912962	rs7310615	chr12:111865049	C=0.465, G=0.535	7e-58
rs7310615	HDL cholesterol levels x alcohol consumption (drinkers vs non-drinkers) interaction (2df)	30698716	rs7310615	chr12:111865049	C=0.465, G=0.535	5e-07
rs7310615	HDL cholesterol levels x alcohol consumption (drinkers vs non-drinkers) interaction (2df)	30698716	rs7310615	chr12:111865049	C=0.465, G=0.535	2e-09
rs7310615	LDL cholesterol levels x alcohol consumption (regular vs non-regular drinkers) interaction (2df)	30698716	rs7310615	chr12:111865049	C=0.465, G=0.535	2e-08
rs7310615	HDL cholesterol levels x alcohol consumption (regular vs non-regular drinkers) interaction (2df)	30698716	rs7310615	chr12:111865049	C=0.465, G=0.535	6e-06
rs7310615	LDL cholesterol levels x alcohol consumption (drinkers vs non-drinkers) interaction (2df)	30698716	rs7310615	chr12:111865049	C=0.465, G=0.535	2e-12
rs7310615	LDL cholesterol levels x alcohol consumption (regular vs non-regular drinkers) interaction (2df)	30698716	rs7310615	chr12:111865049	C=0.465, G=0.535	2e-11
rs7310615	HDL cholesterol levels in current drinkers	30698716	rs7310615	chr12:111865049	C=0.465, G=0.535	3e-06
rs7310615	LDL cholesterol levels x alcohol consumption (drinkers vs non-drinkers) interaction (2df)	30698716	rs7310615	chr12:111865049	C=0.465, G=0.535	1e-08
rs7310615	HDL cholesterol levels x alcohol consumption (regular vs non-regular drinkers) interaction (2df)	30698716	rs7310615	chr12:111865049	C=0.465, G=0.535	3e-07
rs7310615	Autoimmune traits	30595370	rs7310615	chr12:111865049	C=0.465, G=0.535	2e-76
rs7310615	Venous thromboembolism or fibrinogen levels (pleiotropy)	35285134	rs7310615	chr12:111865049	C=0.465, G=0.535	6e-19
rs7310615	Coronary artery disease or fibrinogen levels (pleiotropy)	35285134	rs7310615	chr12:111865049	C=0.465, G=0.535	8e-35
rs7310615	Fibrinogen levels or factor VII levels (pleiotropy)	35285134	rs7310615	chr12:111865049	C=0.465, G=0.535	1e-14
rs7310615	Total cholines levels	38448586	rs7310615	chr12:111865049	C=0.465, G=0.535	2e-18
rs7310615	Total phosphoglycerides levels	38448586	rs7310615	chr12:111865049	C=0.465, G=0.535	1e-16
rs7310615	Total fatty acids	38448586	rs7310615	chr12:111865049	C=0.465, G=0.535	2e-10
rs7310615	Mean diameter of HDL particles	38448586	rs7310615	chr12:111865049	C=0.465, G=0.535	6e-12
rs7310615	Apolipoprotein A-I levels	38448586	rs7310615	chr12:111865049	C=0.465, G=0.535	1e-19
rs7310615	Omega-6 fatty acids levels	38448586	rs7310615	chr12:111865049	C=0.465, G=0.535	1e-19
rs7310615	Free cholesterol levels	38448586	rs7310615	chr12:111865049	C=0.465, G=0.535	5e-17
rs7310615	Sphingomyelins levels	38448586	rs7310615	chr12:111865049	C=0.465, G=0.535	3e-23
rs7310615	Linoleic acid (18:2) levels	38448586	rs7310615	chr12:111865049	C=0.465, G=0.535	4e-19
rs7310615	Myeloproliferative neoplasms	33057200	rs7310615	chr12:111865049	C=0.465, G=0.535	3e-19
rs7310615	Medication use (beta blocking agents)	31015401	rs7310615	chr12:111865049	C=0.465, G=0.535	8e-22
rs7310615	Medication use (diuretics)	31015401	rs7310615	chr12:111865049	C=0.465, G=0.535	5e-16
rs7310615	Medication use (agents acting on the renin-angiotensin system)	31015401	rs7310615	chr12:111865049	C=0.465, G=0.535	3e-27
rs7310615	Edge-level brain connectivity (multivariate analysis)	36800424	rs7310615	chr12:111865049	C=0.465, G=0.535	9e-12
rs7310615	Node-level brain connectivity (multivariate analysis)	36800424	rs7310615	chr12:111865049	C=0.465, G=0.535	7e-11
rs7310615	Medication use (diuretics)	34594039	rs7310615	chr12:111865049	C=0.465, G=0.535	5e-16
rs7310615	Total bilirubin levels	34594039	rs7310615	chr12:111865049	C=0.465, G=0.535	2e-56
rs7310615	Eosinophil counts	34594039	rs7310615	chr12:111865049	C=0.465, G=0.535	4e-298
rs7310615	Phospholipids in very large HDL	38448586	rs7310615	chr12:111865049	C=0.465, G=0.535	7e-13
rs7310615	Polyunsaturated fatty acids	38448586	rs7310615	chr12:111865049	C=0.465, G=0.535	1e-19
rs7310615	Concentration of very large HDL particles	38448586	rs7310615	chr12:111865049	C=0.465, G=0.535	1e-15
rs7310615	Total lipids in very large HDL	38448586	rs7310615	chr12:111865049	C=0.465, G=0.535	3e-16
rs7310615	Phosphatidylcholine and other choline levels	38448586	rs7310615	chr12:111865049	C=0.465, G=0.535	8e-16
rs7310615	Basophil count	34594039	rs7310615	chr12:111865049	C=0.465, G=0.535	2e-11
rs7310615	Hemoglobin	34594039	rs7310615	chr12:111865049	C=0.465, G=0.535	1e-148
rs7310615	Hemoglobin A1c levels	34594039	rs7310615	chr12:111865049	C=0.465, G=0.535	6e-35
rs7310615	Monocyte count	34594039	rs7310615	chr12:111865049	C=0.465, G=0.535	5e-72
rs7310615	Lymphocyte count	34594039	rs7310615	chr12:111865049	C=0.465, G=0.535	7e-260
rs7310615	BMI at birth	35315439	rs7310615	chr12:111865049	C=0.465, G=0.535	7e-09
rs7310615	Medication use (agents acting on the renin-angiotensin system)	34594039	rs7310615	chr12:111865049	C=0.465, G=0.535	3e-27
rs7310615	Medication use (beta blocking agents)	34594039	rs7310615	chr12:111865049	C=0.465, G=0.535	8e-22
rs7310615	TNF-beta levels	37563310	rs7310615	chr12:111865049	C=0.465, G=0.535	6e-24
rs7310615	Dyslexia	36266505	rs7310615	chr12:111865049	C=0.465, G=0.535	1e-10
rs7310615	Adenosine deaminase CECR1 levels	34648354	rs7310615	chr12:111865049	C=0.465, G=0.535	1e-13
rs7310615	Vascular cell adhesion protein 1 levels	34648354	rs7310615	chr12:111865049	C=0.465, G=0.535	2e-31
rs7310615	Serum urate levels	38658550	rs7310615	chr12:111865049	C=0.465, G=0.535	5e-42
rs7310615	Diastolic blood pressure	38459180	rs7310615	chr12:111865049	C=0.465, G=0.535	3e-58
rs7310615	Diastolic blood pressure	38459180	rs7310615	chr12:111865049	C=0.465, G=0.535	3e-88
rs12700001	Cortical surface area (visual PC2)	32198502	rs12700001	chr7:18904400	C=0.608, G=0.392	1e-10
rs12700001	Cortical volume	32963231	rs12700001	chr7:18904400	C=0.608, G=0.392	2e-10
rs11191829	Asthma	36777996	rs11191829	chr10:105614452	G=0.685, T=0.315	9e-09
rs11068773	IDP dMRI TBSS ICVF Retrolenticular part of internal capsule L	33875891	rs11068773	chr12:118443690	A=0.375, G=0.625	6e-11
rs11068773	IDP dMRI TBSS ICVF Sagittal stratum R	33875891	rs11068773	chr12:118443690	A=0.375, G=0.625	9e-11
rs11068773	IDP dMRI ProbtrackX ICVF ptr l	33875891	rs11068773	chr12:118443690	A=0.375, G=0.625	1e-10
rs2369633	Cutaneous malignant melanoma	32341527	rs2369633	chr1:205181062	C=0.896, T=0.104	1e-08
rs2369633	Subcortical volume (MOSTest)	32665545	rs2369633	chr1:205181062	C=0.896, T=0.104	3e-08
rs2369633	Sex hormone-binding globulin levels	32042192	rs2369633	chr1:205181062	C=0.896, T=0.104	1e-10
rs2369633	Sex hormone-binding globulin levels adjusted for BMI	32042192	rs2369633	chr1:205181062	C=0.896, T=0.104	4e-15
rs2369633	Waist-to-hip ratio adjusted for BMI	30239722	rs2369633	chr1:205181062	C=0.896, T=0.104	3e-16
rs2369633	Waist-to-hip ratio adjusted for BMI	34021172	rs2369633	chr1:205181062	C=0.896, T=0.104	3e-11
rs2369633	Blond vs. brown/black hair color	30531825	rs2369633	chr1:205181062	C=0.896, T=0.104	2e-54
rs2369633	Waist-hip index	34021172	rs2369633	chr1:205181062	C=0.896, T=0.104	5e-11
rs2369633	Hair color	29662168	rs2369633	chr1:205181062	C=0.896, T=0.104	6e-61
rs2369633	Basal cell carcinoma (MTAG)	36496446	rs2369633	chr1:205181062	C=0.896, T=0.104	1e-10
rs2369633	Sex hormone-binding globulin levels	36653534	rs2369633	chr1:205181062	C=0.896, T=0.104	5e-11
rs11706071	White matter microstructure (axial diusivities)	31666681	rs11706071	chr3:39492246	A=0.466, C=0.534	2e-08
rs11706071	Cortical surface area	34560273	rs11706071	chr3:39492246	A=0.466, C=0.534	3e-09
rs12149643	White matter microstructure (radial diusivities)	31666681	rs12149643	chr16:87231499	C=0.444, T=0.556	2e-15
rs12149643	White matter microstructure (mean diusivities)	31666681	rs12149643	chr16:87231499	C=0.444, T=0.556	2e-15
rs12149643	White matter microstructure (axial diusivities)	31666681	rs12149643	chr16:87231499	C=0.444, T=0.556	4e-15
rs12149643	White matter microstructure (axial diusivities)	31666681	rs12149643	chr16:87231499	C=0.444, T=0.556	3e-09
rs12149643	White matter microstructure (mode of anisotropy)	31666681	rs12149643	chr16:87231499	C=0.444, T=0.556	5e-10
rs12149643	White matter microstructure (fractional anisotropy)	31666681	rs12149643	chr16:87231499	C=0.444, T=0.556	2e-10
rs12149643	Brain region volumes	31676860	rs12149643	chr16:87231499	C=0.444, T=0.556	7e-24
rs12149643	Left-hemisphere control network to thalamus white-matter structural connectivity	38438384	rs12149643	chr16:87231499	C=0.444, T=0.556	5e-09
rs1474490	Triglyceride levels	34887591	rs1474490	chr21:40716136	A=0.497, C=0.503	3e-16
rs2275180	Tyrosine-protein kinase receptor Tie-1, soluble levels (TIE1.2844.53.2)	29875488	rs2275180	chr1:43773033	A=0.362, G=0.638	5e-24
rs2275180	Systolic blood pressure	35762941	rs2275180	chr1:43773033	A=0.362, G=0.638	1e-10
rs2275180	Height	36224396	rs2275180	chr1:43773033	A=0.362, G=0.638	1e-39
rs310219	DTI autoptx L3 slf l tract	38811844	rs310219	chr1:65315298	C=0.748, T=0.252	5e-06
rs310219	DTI TBSS L3 Superior longitudinal fasciculus L	38811844	rs310219	chr1:65315298	C=0.748, T=0.252	3e-06
rs6593925	White blood cell count	32888493	rs6593925	chr1:205100663	C=0.896, G=0.104	2e-11
rs6593925	Aspartate aminotransferase levels	34315874	rs6593925	chr1:205100663	C=0.896, G=0.104	1e-17
rs6593925	Alanine aminotransferase levels	34315874	rs6593925	chr1:205100663	C=0.896, G=0.104	6e-10
rs116578164	White matter microstructure (radial diusivities)	31666681	rs116578164	chr5:139767963	C=0.183, T=0.817	6e-15
rs116578164	White matter microstructure (fractional anisotropy)	31666681	rs116578164	chr5:139767963	C=0.183, T=0.817	9e-18
rs7098100	Fish- and plant-related diet	32066663	rs7098100	chr10:21834536	A=0.356, G=0.644	5e-11
rs7098100	Breast cancer	29059683	rs7098100	chr10:21834536	A=0.356, G=0.644	1e-18
rs7098100	Breast cancer or ovarian cancer (pleiotropy)	36819030	rs7098100	chr10:21834536	A=0.356, G=0.644	4e-27
rs7098100	Endometriosis (MTAG)	36914876	rs7098100	chr10:21834536	A=0.356, G=0.644	1e-18
rs11042811	White matter microstructure (axial diusivities)	31666681	rs11042811	chr11:10473889	C=0.544, T=0.456	6e-12
rs11042811	IDP dMRI TBSS MO Posterior limb of internal capsule L	33875891	rs11042811	chr11:10473889	C=0.544, T=0.456	1e-14
rs11042811	IDP dMRI TBSS L1 Anterior limb of internal capsule R	33875891	rs11042811	chr11:10473889	C=0.544, T=0.456	7e-09
rs11042811	IDP dMRI TBSS L1 Posterior limb of internal capsule R	33875891	rs11042811	chr11:10473889	C=0.544, T=0.456	4e-16
rs11042811	IDP dMRI TBSS OD Posterior limb of internal capsule R	33875891	rs11042811	chr11:10473889	C=0.544, T=0.456	3e-11
rs11042811	IDP dMRI TBSS OD Posterior limb of internal capsule L	33875891	rs11042811	chr11:10473889	C=0.544, T=0.456	3e-13
rs11042811	Whole brain restricted isotropic diffusion (multivariate analysis)	35505052	rs11042811	chr11:10473889	C=0.544, T=0.456	5e-23
rs11042811	Whole brain restricted directional diffusion (multivariate analysis)	35505052	rs11042811	chr11:10473889	C=0.544, T=0.456	3e-14
rs61897795	Lymphocyte percentage of white cells	32888494	rs61897795	chr11:61618169	A=0.861, G=0.139	7e-11
rs61897795	Neutrophil count	27863252	rs61897795	chr11:61618169	A=0.861, G=0.139	6e-12
rs61897795	Sum basophil neutrophil counts	27863252	rs61897795	chr11:61618169	A=0.861, G=0.139	4e-12
rs61897795	Mean platelet volume	32888494	rs61897795	chr11:61618169	A=0.861, G=0.139	5e-13
rs61897795	Mean reticulocyte volume	32888494	rs61897795	chr11:61618169	A=0.861, G=0.139	2e-38
rs61897795	Neutrophil percentage of white cells	32888494	rs61897795	chr11:61618169	A=0.861, G=0.139	2e-12
rs61897795	Phosphatidylcholine acyl-alkyl C42:1 levels	33414548	rs61897795	chr11:61618169	A=0.861, G=0.139	9e-24
rs61897795	Phosphatidylcholine(36:3)_[M+OAc]1-/Phosphatidylserine(40:2)_[M-H]1- levels	34503513	rs61897795	chr11:61618169	A=0.861, G=0.139	8e-11
rs61897795	Phosphatidylcholine(38:4)_[M+H]1+/Phosphatidylethanolamine(41:4)_[M+H]1+ levels	34503513	rs61897795	chr11:61618169	A=0.861, G=0.139	8e-11
rs61897795	Fatty acid(20:3)_[M-H]1- levels	34503513	rs61897795	chr11:61618169	A=0.861, G=0.139	8e-11
rs61897795	Phosphatidylcholine-O(40:5)_[M+H]1+/Phosphatidylcholine-P(40:4)_[M+H]1+ levels	34503513	rs61897795	chr11:61618169	A=0.861, G=0.139	8e-11
rs61897795	Phosphatidylcholine-O(38:5)_[M+H]1+/Phosphatidylcholine-P(38:4)_[M+H]1+ levels	34503513	rs61897795	chr11:61618169	A=0.861, G=0.139	8e-11
rs61897795	Phosphatidylcholine-O(36:5)_[M+H]1+/Phosphatidylcholine-P(36:4)_[M+H]1+ levels	34503513	rs61897795	chr11:61618169	A=0.861, G=0.139	8e-11
rs61897795	Phosphatidylcholine(37:4)_[M+H]1+/Phosphatidylethanolamine(40:3)_[M+H]1+ levels	34503513	rs61897795	chr11:61618169	A=0.861, G=0.139	8e-11
rs61897795	Phosphatidylcholine(38:3)_[M+H]1+/Phosphatidylethanolamine(41:3)_[M+H]1+/Phosphatidate(43:4)_[M+NH4]1+ levels	34503513	rs61897795	chr11:61618169	A=0.861, G=0.139	8e-11
rs61897795	Phosphatidylcholine(38:3)_[M+OAc]1-/Phosphatidylserine(42:2)_[M-H]1- levels	34503513	rs61897795	chr11:61618169	A=0.861, G=0.139	8e-11
rs61897795	Phosphatidylcholine(36:3)_[M+H]1+/Phosphatidylethanolamine(39:3)_[M+H]1+/Phosphatidate(41:4)_[M+NH4]1+ levels	34503513	rs61897795	chr11:61618169	A=0.861, G=0.139	8e-11
rs61897795	Phosphatidylcholine(37:4)_[M+H]1+/Phosphatidylethanolamine(40:4)_[M+H]1+/Phosphatidate(42:5)_[M+NH4]1+ levels	34503513	rs61897795	chr11:61618169	A=0.861, G=0.139	8e-11
rs61897795	Phosphatidylcholine(38:4)_[M+OAc]1-/Phosphatidylserine(42:3)_[M-H]1- levels	34503513	rs61897795	chr11:61618169	A=0.861, G=0.139	8e-11
rs61897795	Phosphatidylcholine(38:2)_[M+H]1+/Phosphatidylethanolamine(41:2)_[M+H]1+ levels	34503513	rs61897795	chr11:61618169	A=0.861, G=0.139	8e-11
rs61897795	Cholesteryl ester(20:4)_[M+NH4]1+ levels	34503513	rs61897795	chr11:61618169	A=0.861, G=0.139	8e-11
rs61897795	Sphingomyelin(44:9)_[M+H]1- levels	34503513	rs61897795	chr11:61618169	A=0.861, G=0.139	8e-11
rs61897795	1-stearoyl-2-dihomo-linolenoyl-GPC (18:0/20:3n3 or 6) levels	35347128	rs61897795	chr11:61618169	A=0.861, G=0.139	2e-11
rs4843227	White matter microstructure (fractional anisotropy)	31666681	rs4843227	chr16:87225139	C=0.41, T=0.59	1e-16
rs4843227	White matter microstructure (fractional anisotropy)	31666681	rs4843227	chr16:87225139	C=0.41, T=0.59	6e-09
rs4843227	White matter microstructure (mode of anisotropy)	31666681	rs4843227	chr16:87225139	C=0.41, T=0.59	1e-09
rs4843227	Cortical volume	32963231	rs4843227	chr16:87225139	C=0.41, T=0.59	1e-13
rs4843227	Cortical thickness	32963231	rs4843227	chr16:87225139	C=0.41, T=0.59	2e-15
rs4843227	IDP dMRI TBSS MO Body of corpus callosum	33875891	rs4843227	chr16:87225139	C=0.41, T=0.59	9e-18
rs4843227	IDP dMRI TBSS OD Body of corpus callosum	33875891	rs4843227	chr16:87225139	C=0.41, T=0.59	4e-14
rs4843227	Node-level brain connectivity (multivariate analysis)	36800424	rs4843227	chr16:87225139	C=0.41, T=0.59	3e-71
rs4843227	Fornix white matter microstructure (intra-cellular volume fraction)	37236919	rs4843227	chr16:87225139	C=0.41, T=0.59	9e-22
rs4843227	Corpus callosum volume (MOSTest)	37164063	rs4843227	chr16:87225139	C=0.41, T=0.59	7e-16
rs2242522	White matter microstructure (fractional anisotropy)	31666681	rs2242522	chr19:36228954	G=0.493, T=0.507	4e-12
rs9974272	IDP dMRI TBSS ICVF Inferior cerebellar peduncle L	33875891	rs9974272	chr21:42521711	A=0.806, G=0.194	1e-12
rs62235125	White matter microstructure (fractional anisotropy)	31666681	rs62235125	chr22:38485064	C=0.608, G=0.392	5e-08
rs113630349	IDP dMRI TBSS ICVF External capsule L	33875891	rs113630349	chr17:42903044	C=0.176, G=0.824	4e-12
rs10933668	Cortical thickness	34560273	rs10933668	chr3:194470632	C=0.307, T=0.693	5e-12
rs329118	Type 2 diabetes	32541925	rs329118	chr5:133861663	C=0.575, T=0.425	2e-13
rs329118	Age of smoking initiation (MTAG)	30643251	rs329118	chr5:133861663	C=0.575, T=0.425	1e-08
rs329118	Cigarettes smoked per day (MTAG)	30643251	rs329118	chr5:133861663	C=0.575, T=0.425	4e-08
rs329118	Weight	34594039	rs329118	chr5:133861663	C=0.575, T=0.425	8e-15
rs329118	Adult body size	32376654	rs329118	chr5:133861663	C=0.575, T=0.425	9e-12
rs329118	Body mass index	34594039	rs329118	chr5:133861663	C=0.575, T=0.425	5e-20
rs329118	QT interval	36050321	rs329118	chr5:133861663	C=0.575, T=0.425	5e-10
rs329118	BMI (standard GWA)	37106081	rs329118	chr5:133861663	C=0.575, T=0.425	5e-10
rs329118	Smoking cessation	36477530	rs329118	chr5:133861663	C=0.575, T=0.425	7e-12
rs329118	Smoking initiation	36477530	rs329118	chr5:133861663	C=0.575, T=0.425	1e-32
rs329118	Body mass index	37280435	rs329118	chr5:133861663	C=0.575, T=0.425	5e-15
rs7111970	Brain morphology (MOSTest)	35164939	rs7111970	chr11:10471680	A=0.464, G=0.536	1e-08
rs7154256	Plateletcrit	32888494	rs7154256	chr14:75252587	C=0.475, T=0.525	2e-13
rs9899357	Vertex-wise sulcal depth	34910505	rs9899357	chr17:19800549	C=0.385, T=0.615	3e-28
rs4150210	White matter microstructure (fractional anisotropy)	31666681	rs4150210	chr5:139721913	A=0.25, T=0.75	4e-09
rs2956042	IDP dMRI TBSS ICVF Cerebral peduncle R	33875891	rs2956042	chr8:75078802	A=0.753, T=0.247	1e-08
rs1412829	Glioma (high-grade)	19578366	rs1412829	chr9:22043926	A=0.587, G=0.413	2e-10
rs1412829	Nasopharyngeal carcinoma	20512145	rs1412829	chr9:22043926	A=0.587, G=0.413	5e-07
rs1412829	Nasopharyngeal carcinoma	26545403	rs1412829	chr9:22043926	A=0.587, G=0.413	3e-08
rs1412829	Glaucoma (primary open-angle)	33627673	rs1412829	chr9:22043926	A=0.587, G=0.413	1e-27
rs4843558	IDP dMRI ProbtrackX FA str l	33875891	rs4843558	chr16:87225473	A=0.59, G=0.41	2e-13
rs4843558	Brain morphology (MOSTest)	35164939	rs4843558	chr16:87225473	A=0.59, G=0.41	5e-106
rs4843558	Occipital thickness (unadjusted for global measures)	36893272	rs4843558	chr16:87225473	A=0.59, G=0.41	1e-09
rs10018478	Height	36224396	rs10018478	chr4:108891986	A=0.079, T=0.921	8e-18
rs9262549	Hip circumference adjusted for BMI	34021172	rs9262549	chr6:30997692	C=0.765, G=0.235	2e-14
rs9262549	Hip circumference adjusted for BMI	34021172	rs9262549	chr6:30997692	C=0.765, G=0.235	4e-18
rs9262549	Whole body fat free mass (UKB data field 23101)	38538606	rs9262549	chr6:30997692	C=0.765, G=0.235	3e-33
rs4725995	IDP dMRI ProbtrackX OD slf r	33875891	rs4725995	chr7:150819169	C=0.666, T=0.334	6e-11
rs2027995	White matter microstructure (axial diusivities)	31666681	rs2027995	chr17:43161353	C=0.374, T=0.626	9e-09
rs2027995	Corpus callosum fractional anisotropy (MOSTest)	37164063	rs2027995	chr17:43161353	C=0.374, T=0.626	1e-08
rs61788401	Insomnia	35835914	rs61788401	chr1:59317534	A=0.144, T=0.856	5e-10
rs225748	White matter hyperintensity volume (adjusted for hypertension)	33293549	rs225748	chr6:142563242	C=0.756, G=0.244	2e-06
rs225748	White matter hyperintensity volume	33293549	rs225748	chr6:142563242	C=0.756, G=0.244	3e-06
rs225748	White matter hyperintensity volume (adjusted for hypertension)	33293549	rs225748	chr6:142563242	C=0.756, G=0.244	2e-06
rs225748	White matter hyperintensity volume	33293549	rs225748	chr6:142563242	C=0.756, G=0.244	3e-06
rs9801236	PDGFA/PDGFB protein level ratio	38412862	rs9801236	chr7:564083	C=0.176, T=0.824	5e-27
rs9966170	White matter microstructure (fractional anisotropy)	31666681	rs9966170	chr18:35029506	A=0.38, G=0.62	1e-08
rs9966170	Edge-level brain connectivity (multivariate analysis)	36800424	rs9966170	chr18:35029506	A=0.38, G=0.62	5e-10
rs9966170	Node-level brain connectivity (multivariate analysis)	36800424	rs9966170	chr18:35029506	A=0.38, G=0.62	7e-10
rs12699998	Vertex-wise sulcal depth	34910505	rs12699998	chr7:18904175	A=0.615, G=0.385	2e-84
rs1693551	Edge-level brain connectivity (multivariate analysis)	36800424	rs1693551	chr8:101675584	C=0.467, T=0.533	3e-09
rs1693551	Cortical thickness	34560273	rs1693551	chr8:101675584	C=0.467, T=0.533	3e-13
rs1693551	Vertex-wise cortical thickness	34910505	rs1693551	chr8:101675584	C=0.467, T=0.533	5e-11
rs939924	Platelet-to-lymphocyte ratio	34469753	rs939924	chr11:257308	C=0.102, T=0.898	5e-08
rs12653308	White matter microstructure (axial diusivities)	31666681	rs12653308	chr5:82858828	A=0.783, G=0.217	2e-16
rs12653308	White matter microstructure (axial diusivities)	31666681	rs12653308	chr5:82858828	A=0.783, G=0.217	2e-09
rs12653308	wg rh intensity-contrast cuneus	33875891	rs12653308	chr5:82858828	A=0.783, G=0.217	1e-14
rs12653308	wg lh intensity-contrast transversetemporal	33875891	rs12653308	chr5:82858828	A=0.783, G=0.217	1e-14
rs12653308	IDP dMRI ProbtrackX ICVF cgc r	33875891	rs12653308	chr5:82858828	A=0.783, G=0.217	1e-52
rs12653308	wg lh intensity-contrast cuneus	33875891	rs12653308	chr5:82858828	A=0.783, G=0.217	3e-11
rs12653308	wg rh intensity-contrast transversetemporal	33875891	rs12653308	chr5:82858828	A=0.783, G=0.217	6e-19
rs12653308	wg rh intensity-contrast precentral	33875891	rs12653308	chr5:82858828	A=0.783, G=0.217	1e-17
rs12653308	Whole brain restricted isotropic diffusion (multivariate analysis)	35505052	rs12653308	chr5:82858828	A=0.783, G=0.217	1e-107
rs12653308	MRI-derived phenotypes (MOSTest) (pleiotropy)	38531894	rs12653308	chr5:82858828	A=0.783, G=0.217	2e-91
rs12653308	DTI TBSS FA Sagittal stratum L	38811844	rs12653308	chr5:82858828	A=0.783, G=0.217	7e-12
rs2535305	A body shape index	34021172	rs2535305	chr6:31054381	A=0.528, G=0.472	8e-10
rs798498	Birth weight (MTAG)	31681408	rs798498	chr7:2795882	G=0.307, T=0.693	3e-08
rs798498	Whole body fat mass (UKB data field 23100)	38538606	rs798498	chr7:2795882	G=0.307, T=0.693	1e-14
rs798498	Right-hemisphere salience/ventral attention network to putamen white-matter structural connectivity	38438384	rs798498	chr7:2795882	G=0.307, T=0.693	6e-09
rs77216612	Platelet count	32888493	rs77216612	chr12:12877983	A=0.713, G=0.287	5e-13
rs77216612	Heel bone mineral density	30598549	rs77216612	chr12:12877983	A=0.713, G=0.287	7e-14
rs77216612	Lymphocyte count	27863252	rs77216612	chr12:12877983	A=0.713, G=0.287	5e-15
rs77216612	Heel bone mineral density	30595370	rs77216612	chr12:12877983	A=0.713, G=0.287	1e-10
rs77216612	Heel bone mineral density	30048462	rs77216612	chr12:12877983	A=0.713, G=0.287	4e-09
rs77216612	Diastolic blood pressure (BMI unadjusted)	39048560	rs77216612	chr12:12877983	A=0.713, G=0.287	5e-08
rs77216612	Prostate cancer	33398198	rs77216612	chr12:12877983	A=0.713, G=0.287	2e-08
rs77216612	Prostate cancer	33398198	rs77216612	chr12:12877983	A=0.713, G=0.287	2e-07
rs77216612	C-reactive protein	34594039	rs77216612	chr12:12877983	A=0.713, G=0.287	3e-09
rs77216612	Mean arterial pressure (BMI unadjusted)	39048560	rs77216612	chr12:12877983	A=0.713, G=0.287	4e-10
rs77216612	Mean arterial pressure (BMI adjusted)	39048560	rs77216612	chr12:12877983	A=0.713, G=0.287	6e-09
rs77216612	Medication use (agents acting on the renin-angiotensin system)	34594039	rs77216612	chr12:12877983	A=0.713, G=0.287	2e-11
rs77216612	White blood cell count	36329257	rs77216612	chr12:12877983	A=0.713, G=0.287	2e-09
rs77216612	Smoking initiation	36477530	rs77216612	chr12:12877983	A=0.713, G=0.287	3e-12
rs77216612	White blood cell count	38116116	rs77216612	chr12:12877983	A=0.713, G=0.287	2e-11
rs12450956	Intelligence	36378351	rs12450956	chr17:28529025	A=0.558, G=0.442	3e-08
rs6006427	White matter microstructure (radial diusivities)	31666681	rs6006427	chr22:30669993	C=0.247, T=0.753	4e-08
rs6826663	White blood cell count	32888493	rs6826663	chr4:54217607	C=0.131, T=0.869	7e-13
rs806977	Parental longevity (father's age at death or father's attained age)	31484785	rs806977	chr6:26189615	A=0.476, G=0.524	5e-06
rs10840420	IDP dMRI TBSS MD Splenium of corpus callosum	33875891	rs10840420	chr11:10490415	C=0.45, T=0.55	2e-09
rs10840420	IDP dMRI TBSS MD Posterior limb of internal capsule L	33875891	rs10840420	chr11:10490415	C=0.45, T=0.55	2e-09
rs10840420	IDP dMRI TBSS L1 Retrolenticular part of internal capsule L	33875891	rs10840420	chr11:10490415	C=0.45, T=0.55	5e-09
rs1182197	Brain region volumes	31676860	rs1182197	chr7:2863289	A=0.637, C=0.363	1e-08
rs1182197	Brain region volumes	31676860	rs1182197	chr7:2863289	A=0.637, C=0.363	3e-09
rs1182197	Brain region volumes	31676860	rs1182197	chr7:2863289	A=0.637, C=0.363	6e-09
rs1182197	Platelet distribution width	32888494	rs1182197	chr7:2863289	A=0.637, C=0.363	1e-10
rs1182197	Colorectal cancer	36539618	rs1182197	chr7:2863289	A=0.637, C=0.363	5e-09
rs1182197	Fornix white matter microstructure (intra-cellular volume fraction)	37236919	rs1182197	chr7:2863289	A=0.637, C=0.363	1e-10
rs6944563	Lymphocyte count	34594039	rs6944563	chr7:134389713	C=0.687, T=0.313	1e-11
rs6944563	T1 brain MRIs Unsupervised Deep learning derived Imaging Phenotypes (dimension 57)	38580839	rs6944563	chr7:134389713	C=0.687, T=0.313	2e-11
rs72748148	IDP dMRI ProbtrackX MD unc l	33875891	rs72748148	chr9:113677241	A=0.19, G=0.81	1e-10
rs72748148	IDP dMRI ProbtrackX L2 unc l	33875891	rs72748148	chr9:113677241	A=0.19, G=0.81	2e-08
rs72748148	Central corneal thickness	31798171	rs72748148	chr9:113677241	A=0.19, G=0.81	6e-11
rs72748148	Whole brain free water diffusion (multivariate analysis)	35505052	rs72748148	chr9:113677241	A=0.19, G=0.81	9e-47
rs72748148	Whole brain restricted directional diffusion (multivariate analysis)	35505052	rs72748148	chr9:113677241	A=0.19, G=0.81	1e-10
rs72748148	Node-level brain connectivity (multivariate analysis)	36800424	rs72748148	chr9:113677241	A=0.19, G=0.81	8e-12
rs2074585	Male-pattern baldness	30573740	rs2074585	chr15:91009484	A=0.534, G=0.466	1e-37
rs2074585	White blood cell count (basophil)	27863252	rs2074585	chr15:91009484	A=0.534, G=0.466	2e-16
rs2074585	Basophil percentage of white cells	27863252	rs2074585	chr15:91009484	A=0.534, G=0.466	2e-20
rs2074585	Basophil percentage of granulocytes	27863252	rs2074585	chr15:91009484	A=0.534, G=0.466	1e-13
rs2074585	Male-pattern baldness	28196072	rs2074585	chr15:91009484	A=0.534, G=0.466	2e-11
rs2074585	Total testosterone levels	32042192	rs2074585	chr15:91009484	A=0.534, G=0.466	9e-09
rs2074585	Red cell distribution width	32888494	rs2074585	chr15:91009484	A=0.534, G=0.466	5e-12
rs2074585	Balding type 1	30595370	rs2074585	chr15:91009484	A=0.534, G=0.466	3e-21
rs2074585	Red cell distribution width	30595370	rs2074585	chr15:91009484	A=0.534, G=0.466	9e-13
rs2074585	Basophil percentage of white cells	32888494	rs2074585	chr15:91009484	A=0.534, G=0.466	2e-73
rs2074585	Basophil count	32888494	rs2074585	chr15:91009484	A=0.534, G=0.466	6e-59
rs2074585	Basophil count	32888493	rs2074585	chr15:91009484	A=0.534, G=0.466	4e-49
rs2074585	Eczema	30595370	rs2074585	chr15:91009484	A=0.534, G=0.466	3e-22
rs2074585	Testosterone levels	35192695	rs2074585	chr15:91009484	A=0.534, G=0.466	2e-07
rs2074585	Testosterone levels	35192695	rs2074585	chr15:91009484	A=0.534, G=0.466	2e-07
rs11640181	Left-hemisphere control network to putamen white-matter structural connectivity	38438384	rs11640181	chr16:87258088	A=0.417, G=0.583	2e-09
rs58432198	Type 2 diabetes	30595370	rs58432198	chr1:51256091	C=0.883, T=0.117	2e-07
rs58432198	Brain region volumes	31676860	rs58432198	chr1:51256091	C=0.883, T=0.117	1e-08
rs58432198	Type 2 diabetes	30297969	rs58432198	chr1:51256091	C=0.883, T=0.117	2e-10
rs58432198	Type 2 diabetes	30718926	rs58432198	chr1:51256091	C=0.883, T=0.117	3e-09
rs58432198	Medication use (drugs used in diabetes)	34594039	rs58432198	chr1:51256091	C=0.883, T=0.117	9e-11
rs10857614	IDP dMRI TBSS ICVF Sagittal stratum L	33875891	rs10857614	chr10:49829983	C=0.475, T=0.525	3e-10
rs10857614	IDP dMRI TBSS ICVF Sagittal stratum R	33875891	rs10857614	chr10:49829983	C=0.475, T=0.525	1e-09
rs10857614	IDP dMRI TBSS ICVF Middle cerebellar peduncle	33875891	rs10857614	chr10:49829983	C=0.475, T=0.525	4e-10
rs10857614	Ascending aorta distensibility	35922433	rs10857614	chr10:49829983	C=0.475, T=0.525	4e-08
rs10857614	DTI TBSS MD Sagittal stratum L	38811844	rs10857614	chr10:49829983	C=0.475, T=0.525	1e-05
rs11191822	Brain morphology (MOSTest)	32665545	rs11191822	chr10:105599770	G=0.309, T=0.691	1e-08
rs11191822	Whole brain free water diffusion (multivariate analysis)	35505052	rs11191822	chr10:105599770	G=0.309, T=0.691	2e-13
rs11191822	Retinal arteriolar tortuosity	36757925	rs11191822	chr10:105599770	G=0.309, T=0.691	1e-09
rs9308343	Temporal pole thickness (unadjusted for global measures)	36893272	rs9308343	chr16:87224857	A=0.546, G=0.454	2e-08
rs9308343	DTI TBSS L1 Superior corona radiata L	38811844	rs9308343	chr16:87224857	A=0.546, G=0.454	5e-06
rs17750683	Corpus callosum volume	37164063	rs17750683	chr2:187620297	A=0.68, T=0.32	2e-08
rs924455	Cortical surface area	34560273	rs924455	chr5:15747866	C=0.562, T=0.438	1e-11
rs309587	White matter microstructure (mean diusivities)	31666681	rs309587	chr5:82856519	C=0.332, T=0.668	1e-13
rs309587	White matter microstructure (radial diusivities)	31666681	rs309587	chr5:82856519	C=0.332, T=0.668	1e-17
rs309587	White matter microstructure (mean diusivities)	31666681	rs309587	chr5:82856519	C=0.332, T=0.668	5e-21
rs309587	White matter microstructure (axial diusivities)	31666681	rs309587	chr5:82856519	C=0.332, T=0.668	1e-13
rs309587	White matter microstructure (radial diusivities)	31666681	rs309587	chr5:82856519	C=0.332, T=0.668	1e-20
rs309587	White matter microstructure (radial diusivities)	31666681	rs309587	chr5:82856519	C=0.332, T=0.668	4e-17
rs309587	White matter microstructure (radial diusivities)	31666681	rs309587	chr5:82856519	C=0.332, T=0.668	4e-17
rs309587	White matter microstructure (fractional anisotropy)	31666681	rs309587	chr5:82856519	C=0.332, T=0.668	2e-10
rs309587	White matter microstructure (fractional anisotropy)	31666681	rs309587	chr5:82856519	C=0.332, T=0.668	4e-16
rs309587	White matter microstructure (fractional anisotropy)	31666681	rs309587	chr5:82856519	C=0.332, T=0.668	5e-11
rs309587	White matter microstructure (fractional anisotropy)	31666681	rs309587	chr5:82856519	C=0.332, T=0.668	2e-10
rs309587	White matter microstructure (fractional anisotropy)	31666681	rs309587	chr5:82856519	C=0.332, T=0.668	2e-08
rs309587	White matter microstructure (fractional anisotropy)	31666681	rs309587	chr5:82856519	C=0.332, T=0.668	4e-17
rs309587	White matter microstructure (mean diusivities)	31666681	rs309587	chr5:82856519	C=0.332, T=0.668	1e-15
rs309587	White matter microstructure (mean diusivities)	31666681	rs309587	chr5:82856519	C=0.332, T=0.668	4e-12
rs309587	White matter microstructure (mean diusivities)	31666681	rs309587	chr5:82856519	C=0.332, T=0.668	6e-17
rs309587	White matter microstructure (mean diusivities)	31666681	rs309587	chr5:82856519	C=0.332, T=0.668	1e-15
rs309587	White matter microstructure (axial diusivities)	31666681	rs309587	chr5:82856519	C=0.332, T=0.668	3e-13
rs309587	White matter microstructure (axial diusivities)	31666681	rs309587	chr5:82856519	C=0.332, T=0.668	3e-17
rs309587	White matter microstructure (radial diusivities)	31666681	rs309587	chr5:82856519	C=0.332, T=0.668	7e-18
rs309587	White matter microstructure (mean diusivities)	31666681	rs309587	chr5:82856519	C=0.332, T=0.668	9e-19
rs309587	White matter microstructure (mean diusivities)	31666681	rs309587	chr5:82856519	C=0.332, T=0.668	3e-09
rs309587	White matter microstructure (mean diusivities)	31666681	rs309587	chr5:82856519	C=0.332, T=0.668	2e-10
rs309587	White matter microstructure (mean diusivities)	31666681	rs309587	chr5:82856519	C=0.332, T=0.668	4e-20
rs309587	White matter microstructure (axial diusivities)	31666681	rs309587	chr5:82856519	C=0.332, T=0.668	2e-08
rs309587	White matter microstructure (axial diusivities)	31666681	rs309587	chr5:82856519	C=0.332, T=0.668	4e-12
rs309587	White matter microstructure (axial diusivities)	31666681	rs309587	chr5:82856519	C=0.332, T=0.668	8e-10
rs309587	White matter microstructure (radial diusivities)	31666681	rs309587	chr5:82856519	C=0.332, T=0.668	4e-12
rs309587	White matter microstructure (mean diusivities)	31666681	rs309587	chr5:82856519	C=0.332, T=0.668	2e-08
rs309587	White matter microstructure (mean diusivities)	31666681	rs309587	chr5:82856519	C=0.332, T=0.668	5e-14
rs309587	White matter microstructure (axial diusivities)	31666681	rs309587	chr5:82856519	C=0.332, T=0.668	4e-10
rs309587	White matter microstructure (mean diusivities)	31666681	rs309587	chr5:82856519	C=0.332, T=0.668	1e-21
rs309587	White matter microstructure (mean diusivities)	31666681	rs309587	chr5:82856519	C=0.332, T=0.668	8e-10
rs309587	White matter microstructure (mean diusivities)	31666681	rs309587	chr5:82856519	C=0.332, T=0.668	2e-15
rs309587	White matter microstructure (mean diusivities)	31666681	rs309587	chr5:82856519	C=0.332, T=0.668	1e-17
rs309587	White matter microstructure (axial diusivities)	31666681	rs309587	chr5:82856519	C=0.332, T=0.668	8e-09
rs309587	White matter microstructure (radial diusivities)	31666681	rs309587	chr5:82856519	C=0.332, T=0.668	5e-11
rs309587	White matter microstructure (radial diusivities)	31666681	rs309587	chr5:82856519	C=0.332, T=0.668	2e-13
rs309587	White matter microstructure (radial diusivities)	31666681	rs309587	chr5:82856519	C=0.332, T=0.668	9e-22
rs309587	White matter microstructure (radial diusivities)	31666681	rs309587	chr5:82856519	C=0.332, T=0.668	1e-16
rs309587	White matter microstructure (radial diusivities)	31666681	rs309587	chr5:82856519	C=0.332, T=0.668	8e-18
rs309587	White matter microstructure (radial diusivities)	31666681	rs309587	chr5:82856519	C=0.332, T=0.668	9e-14
rs309587	White matter microstructure (fractional anisotropy)	31666681	rs309587	chr5:82856519	C=0.332, T=0.668	7e-14
rs309587	White matter microstructure (radial diusivities)	31666681	rs309587	chr5:82856519	C=0.332, T=0.668	9e-11
rs309587	White matter microstructure (fractional anisotropy)	31666681	rs309587	chr5:82856519	C=0.332, T=0.668	8e-13
rs309587	White matter microstructure (fractional anisotropy)	31666681	rs309587	chr5:82856519	C=0.332, T=0.668	1e-10
rs309587	wg rh intensity-contrast paracentral	33875891	rs309587	chr5:82856519	C=0.332, T=0.668	2e-18
rs309587	wg lh intensity-contrast paracentral	33875891	rs309587	chr5:82856519	C=0.332, T=0.668	4e-19
rs309587	IDP dMRI TBSS L1 External capsule L	33875891	rs309587	chr5:82856519	C=0.332, T=0.668	5e-13
rs309587	White matter microstructure (mean diusivities)	31666681	rs309587	chr5:82856519	C=0.332, T=0.668	2e-19
rs309587	Cortical thickness (min-P)	32665545	rs309587	chr5:82856519	C=0.332, T=0.668	3e-08
rs309587	DTI TBSS L3 Tapetum L	38811844	rs309587	chr5:82856519	C=0.332, T=0.668	2e-06
rs309587	DTI TBSS MD Tapetum R	38811844	rs309587	chr5:82856519	C=0.332, T=0.668	7e-06
rs309587	DTI TBSS MD Tapetum L	38811844	rs309587	chr5:82856519	C=0.332, T=0.668	5e-07
rs76967117	LDL cholesterol levels	32203549	rs76967117	chr6:34603691	A=0.099, G=0.901	2e-17
rs76967117	Liver enzyme levels (gamma-glutamyl transferase)	33972514	rs76967117	chr6:34603691	A=0.099, G=0.901	2e-26
rs76967117	Concentration of HDL particles	35213538	rs76967117	chr6:34603691	A=0.099, G=0.901	5e-11
rs76967117	LDL cholesterol	34594039	rs76967117	chr6:34603691	A=0.099, G=0.901	3e-13
rs77303590	Thyroid stimulating hormone levels	37872160	rs77303590	chr1:48865121	C=0.978, T=0.022	3e-14
rs9468220	Corpus callosum fractional anisotropy (splenium)	37164063	rs9468220	chr6:27732976	C=0.78, T=0.22	5e-11
rs4130668	Body fat percentage (adjusted for testosterone and SHBG)	37867527	rs4130668	chr17:7739664	C=0.771, T=0.229	9e-10
rs7704277	IDP dMRI TBSS L1 Splenium of corpus callosum	33875891	rs7704277	chr5:15713072	C=0.617, T=0.383	9e-14
rs3117426	White matter microstructure (radial diusivities)	31666681	rs3117426	chr6:29272012	C=0.816, T=0.184	4e-10
rs3117426	White matter microstructure (radial diusivities)	31666681	rs3117426	chr6:29272012	C=0.816, T=0.184	2e-08
rs3117426	White matter microstructure (radial diusivities)	31666681	rs3117426	chr6:29272012	C=0.816, T=0.184	1e-09
rs3117426	White matter microstructure (fractional anisotropy)	31666681	rs3117426	chr6:29272012	C=0.816, T=0.184	4e-08
rs112576539	Corpus callosum fractional anisotropy (splenium)	37164063	rs112576539	chr7:546952	A=0.29, C=0.71	9e-10
rs112576539	Corpus callosum fractional anisotropy (MOSTest)	37164063	rs112576539	chr7:546952	A=0.29, C=0.71	2e-09
rs76738717	White matter microstructure (radial diusivities)	31666681	rs76738717	chr5:82891305	A=0.848, G=0.152	4e-08
rs112665297	White matter microstructure (axial diusivities)	31666681	rs112665297	chr17:44348634	C=0.2, T=0.8	1e-11
rs10922299	Insomnia	35835914	rs10922299	chr1:197812165	C=0.728, T=0.272	2e-08
rs17279437	Urinary metabolites	21572414	rs17279437	chr3:45814094	A=0.092, G=0.908	3e-19
rs17279437	Urinary metabolites	26352407	rs17279437	chr3:45814094	A=0.092, G=0.908	8e-60
rs17279437	Urinary metabolites	26352407	rs17279437	chr3:45814094	A=0.092, G=0.908	8e-22
rs17279437	Macular telangiectasia type 2	33654266	rs17279437	chr3:45814094	A=0.092, G=0.908	6e-10
rs17279437	Macular thickness	30535121	rs17279437	chr3:45814094	A=0.092, G=0.908	1e-71
rs17279437	Macular telangiectasia type 2	33654266	rs17279437	chr3:45814094	A=0.092, G=0.908	1e-09
rs17279437	Brain shape (segment 10)	33821002	rs17279437	chr3:45814094	A=0.092, G=0.908	4e-10
rs17279437	Retinal nerve fibre layer thickness or ganglion cell inner plexiform layer thickness (MTAG)	33979322	rs17279437	chr3:45814094	A=0.092, G=0.908	8e-24
rs17279437	Retinal nerve fibre layer (RNFL) thickness	33979322	rs17279437	chr3:45814094	A=0.092, G=0.908	1e-07
rs17279437	Ganglion cell inner plexiform layer (GCIPL) thickness	33979322	rs17279437	chr3:45814094	A=0.092, G=0.908	8e-24
rs17279437	Whole brain restricted isotropic diffusion (multivariate analysis)	35505052	rs17279437	chr3:45814094	A=0.092, G=0.908	7e-16
rs17279437	Edge-level brain connectivity (multivariate analysis)	36800424	rs17279437	chr3:45814094	A=0.092, G=0.908	1e-09
rs17279437	Betaine levels	33437055	rs17279437	chr3:45814094	A=0.092, G=0.908	5e-15
rs17279437	Vertex-wise sulcal depth	34910505	rs17279437	chr3:45814094	A=0.092, G=0.908	2e-20
rs17279437	Urine dimethylglycine levels in chronic kidney disease	37277652	rs17279437	chr3:45814094	A=0.092, G=0.908	1e-30
rs17279437	Plasma X-23780 levels in chronic kidney disease	37277652	rs17279437	chr3:45814094	A=0.092, G=0.908	2e-14
rs17279437	Trigonelline (n'-methylnicotinate) levels	35347128	rs17279437	chr3:45814094	A=0.092, G=0.908	6e-44
rs17279437	N-methylpipecolate levels	35347128	rs17279437	chr3:45814094	A=0.092, G=0.908	1e-11
rs17279437	X-23644 levels	35347128	rs17279437	chr3:45814094	A=0.092, G=0.908	1e-15
rs17279437	X-23780 levels	35347128	rs17279437	chr3:45814094	A=0.092, G=0.908	2e-26
rs17279437	Pyroglutamine levels	35347128	rs17279437	chr3:45814094	A=0.092, G=0.908	3e-20
rs17279437	X-11315-to-pyroglutamine ratio	24816252	rs17279437	chr3:45814094	A=0.092, G=0.908	2e-35
rs17279437	Pyroglutamine levels	35050183	rs17279437	chr3:45814094	A=0.092, G=0.908	3e-32
rs17279437	Brain morphology (MOSTest)	35164939	rs17279437	chr3:45814094	A=0.092, G=0.908	2e-16
rs17279437	Trigonelline (n'-methylnicotinate) levels	35050183	rs17279437	chr3:45814094	A=0.092, G=0.908	2e-16
rs17279437	N,n-dimethylalanine (X-23585) levels	35050183	rs17279437	chr3:45814094	A=0.092, G=0.908	4e-17
rs17279437	X-23585 levels	36357675	rs17279437	chr3:45814094	A=0.092, G=0.908	8e-40
rs17279437	X-23644 levels	36357675	rs17279437	chr3:45814094	A=0.092, G=0.908	9e-23
rs17279437	Trigonelline (n'-methylnicotinate) levels	36357675	rs17279437	chr3:45814094	A=0.092, G=0.908	1e-22
rs17279437	Pyroglutamine levels	36357675	rs17279437	chr3:45814094	A=0.092, G=0.908	4e-106
rs17279437	Pyroglutamine levels	24816252	rs17279437	chr3:45814094	A=0.092, G=0.908	1e-20
rs17279437	X-11315 levels	36635386	rs17279437	chr3:45814094	A=0.092, G=0.908	4e-17
rs17279437	X-23780 levels	36635386	rs17279437	chr3:45814094	A=0.092, G=0.908	3e-37
rs17279437	Glutamine degradant levels	36635386	rs17279437	chr3:45814094	A=0.092, G=0.908	3e-29
rs17279437	N,N-dimethylalanine levels	36635386	rs17279437	chr3:45814094	A=0.092, G=0.908	7e-18
rs17279437	Metabolite levels (Pyroglutamine)	37253714	rs17279437	chr3:45814094	A=0.092, G=0.908	6e-18
rs17279437	Body mass index	36581621	rs17279437	chr3:45814094	A=0.092, G=0.908	1e-09
rs17279437	Hospitalized COVID-19 or BMI (pleiotropy)	38352709	rs17279437	chr3:45814094	A=0.092, G=0.908	1e-16
rs17279437	T2 brain MRIs Unsupervised Deep learning derived Imaging Phenotypes (dimension 31)	38580839	rs17279437	chr3:45814094	A=0.092, G=0.908	7e-12
rs4556147	IDP dMRI TBSS ISOVF External capsule L	33875891	rs4556147	chr9:113651161	A=0.801, T=0.199	1e-14
rs4556147	IDP dMRI TBSS ISOVF Superior longitudinal fasciculus R	33875891	rs4556147	chr9:113651161	A=0.801, T=0.199	2e-14
rs4556147	IDP dMRI TBSS ISOVF Superior longitudinal fasciculus L	33875891	rs4556147	chr9:113651161	A=0.801, T=0.199	4e-11
rs4556147	Brain shape (segment 58)	33821002	rs4556147	chr9:113651161	A=0.801, T=0.199	4e-12
rs4556147	Whole brain restricted isotropic diffusion (multivariate analysis)	35505052	rs4556147	chr9:113651161	A=0.801, T=0.199	1e-22
rs1416901	Insomnia	35835914	rs1416901	chr10:21820453	A=0.352, G=0.648	4e-15
rs2342118	Cortical thickness	34560273	rs2342118	chr15:85693016	A=0.666, G=0.334	2e-13
rs2342118	Whole brain restricted isotropic diffusion (multivariate analysis)	35505052	rs2342118	chr15:85693016	A=0.666, G=0.334	1e-15
rs2342118	Whole brain free water diffusion (multivariate analysis)	35505052	rs2342118	chr15:85693016	A=0.666, G=0.334	6e-14
rs2342118	Vertex-wise cortical surface area	34910505	rs2342118	chr15:85693016	A=0.666, G=0.334	9e-09
rs2342118	Vertex-wise cortical thickness	34910505	rs2342118	chr15:85693016	A=0.666, G=0.334	6e-16
rs2342118	Brain morphology (MOSTest)	35164939	rs2342118	chr15:85693016	A=0.666, G=0.334	4e-08
rs3129119	White matter microstructure (mean diusivities)	31666681	rs3129119	chr6:29102861	A=0.776, G=0.224	2e-11
rs3129119	White matter microstructure (mean diusivities)	31666681	rs3129119	chr6:29102861	A=0.776, G=0.224	1e-09
rs3129119	White matter microstructure (radial diusivities)	31666681	rs3129119	chr6:29102861	A=0.776, G=0.224	3e-11
rs3129119	White matter microstructure (radial diusivities)	31666681	rs3129119	chr6:29102861	A=0.776, G=0.224	2e-08
rs3129119	F-bitter food liking (derived food-liking factor)	35585065	rs3129119	chr6:29102861	A=0.776, G=0.224	1e-08
rs3129119	Body mass index	38538606	rs3129119	chr6:29102861	A=0.776, G=0.224	3e-08
rs4768849	White matter microstructure (radial diusivities)	31666681	rs4768849	chr12:50921495	A=0.987, G=0.013	3e-08
rs9899833	White matter microstructure (axial diusivities)	31666681	rs9899833	chr17:43992943	A=0.361, G=0.639	4e-08
rs9899833	White matter microstructure (radial diusivities)	31666681	rs9899833	chr17:43992943	A=0.361, G=0.639	7e-11
rs9899833	White matter microstructure (radial diusivities)	31666681	rs9899833	chr17:43992943	A=0.361, G=0.639	3e-08
rs9899833	White matter microstructure (mean diusivities)	31666681	rs9899833	chr17:43992943	A=0.361, G=0.639	4e-08
rs9899833	White matter microstructure (mean diusivities)	31666681	rs9899833	chr17:43992943	A=0.361, G=0.639	2e-08
rs9899833	White matter microstructure (axial diusivities)	31666681	rs9899833	chr17:43992943	A=0.361, G=0.639	3e-08
rs9899833	White matter microstructure (mean diusivities)	31666681	rs9899833	chr17:43992943	A=0.361, G=0.639	6e-10
rs9899833	White matter microstructure (mean diusivities)	31666681	rs9899833	chr17:43992943	A=0.361, G=0.639	5e-11
rs9899833	General factor of neuroticism	30867560	rs9899833	chr17:43992943	A=0.361, G=0.639	5e-15
rs9899833	Headache or migraine	36939796	rs9899833	chr17:43992943	A=0.361, G=0.639	5e-12
rs430114	N-acetylglutamate levels	33437055	rs430114	chr20:45186397	C=0.816, T=0.184	4e-20
rs1654728	Right-hemisphere visual network to right-hemisphere dorsal attention network white-matter structural connectivity	38438384	rs1654728	chr8:108394663	A=0.604, G=0.396	2e-08
rs143383	Height	31562340	rs143383	chr20:34025983	A=0.628, G=0.372	9e-78
rs143383	Knee osteoarthritis	30374069	rs143383	chr20:34025983	A=0.628, G=0.372	8e-18
rs143383	Height	34270706	rs143383	chr20:34025983	A=0.628, G=0.372	1e-09
rs143383	Whole brain free water diffusion (multivariate analysis)	35505052	rs143383	chr20:34025983	A=0.628, G=0.372	3e-15
rs143383	Knee osteoarthritis	30664745	rs143383	chr20:34025983	A=0.628, G=0.372	5e-07
rs143383	Cortical surface area	34560273	rs143383	chr20:34025983	A=0.628, G=0.372	1e-17
rs143383	Vertex-wise cortical surface area	34910505	rs143383	chr20:34025983	A=0.628, G=0.372	2e-16
rs143383	Idiopathic knee osteoarthritis	37247657	rs143383	chr20:34025983	A=0.628, G=0.372	2e-12
rs143383	Prostate cancer	37945903	rs143383	chr20:34025983	A=0.628, G=0.372	1e-12
rs143383	Prostate cancer	37945903	rs143383	chr20:34025983	A=0.628, G=0.372	3e-10
rs143383	T2 brain MRIs Unsupervised Deep learning derived Imaging Phenotypes (dimension 93)	38580839	rs143383	chr20:34025983	A=0.628, G=0.372	1e-23
rs1609829	Heel bone mineral density	30598549	rs1609829	chr1:180909061	C=0.711, T=0.289	1e-10
rs1609829	Serum alkaline phosphatase levels	33462484	rs1609829	chr1:180909061	C=0.711, T=0.289	7e-13
rs1609829	Heel bone mineral density	30048462	rs1609829	chr1:180909061	C=0.711, T=0.289	3e-09
rs1609829	Platelet count	34594039	rs1609829	chr1:180909061	C=0.711, T=0.289	1e-12
rs1609829	White blood cell count	34594039	rs1609829	chr1:180909061	C=0.711, T=0.289	6e-12
rs74675536	White matter microstructure (mean diusivities)	31666681	rs74675536	chr2:203673073	A=0.129, G=0.871	2e-11
rs74675536	White matter microstructure (mean diusivities)	31666681	rs74675536	chr2:203673073	A=0.129, G=0.871	5e-08
rs9647379	Heart rate	23583979	rs9647379	chr3:171785168	C=0.407, G=0.593	1e-09
rs9647379	Appendicular lean mass	31761296	rs9647379	chr3:171785168	C=0.407, G=0.593	2e-09
rs9647379	Waist-hip ratio	30595370	rs9647379	chr3:171785168	C=0.407, G=0.593	4e-12
rs9647379	Hypertrophic cardiomyopathy	33495596	rs9647379	chr3:171785168	C=0.407, G=0.593	8e-11
rs9647379	Hypertrophic cardiomyopathy (MTAG)	33495596	rs9647379	chr3:171785168	C=0.407, G=0.593	1e-08
rs9647379	Appendicular lean mass	33097823	rs9647379	chr3:171785168	C=0.407, G=0.593	3e-21
rs9647379	Waist-to-hip ratio adjusted for BMI	30575882	rs9647379	chr3:171785168	C=0.407, G=0.593	3e-14
rs9647379	Waist-hip ratio	30575882	rs9647379	chr3:171785168	C=0.407, G=0.593	5e-08
rs4843231	White matter microstructure (mode of anisotropy)	31666681	rs4843231	chr16:87264534	A=0.672, G=0.328	9e-10
rs137912621	IDP dMRI ProbtrackX ICVF atr r	33875891	rs137912621	chr17:42903795	A=0.163, G=0.837	9e-15
rs137912621	IDP dMRI ProbtrackX ICVF atr l	33875891	rs137912621	chr17:42903795	A=0.163, G=0.837	4e-16
rs137912621	IDP dMRI TBSS ICVF Cingulum cingulate gyrus R	33875891	rs137912621	chr17:42903795	A=0.163, G=0.837	3e-11
rs137912621	IDP dMRI ProbtrackX ICVF unc r	33875891	rs137912621	chr17:42903795	A=0.163, G=0.837	4e-12
rs202393	IDP dMRI TBSS ICVF Superior longitudinal fasciculus L	33875891	rs202393	chr20:45195738	C=0.817, T=0.183	1e-08
rs1329128	Mean spheric corpuscular volume	32888494	rs1329128	chr1:234736928	A=0.164, C=0.836	9e-13
rs1329128	Diastolic blood pressure	34594039	rs1329128	chr1:234736928	A=0.164, C=0.836	2e-08
rs1570221	Chronic obstructive pulmonary disease	30804561	rs1570221	chr10:105656874	A=0.309, G=0.691	2e-08
rs2668639	IDP dMRI TBSS L1 Superior longitudinal fasciculus R	33875891	rs2668639	chr17:44324539	C=0.75, T=0.25	3e-15
rs2668639	IDP dMRI ProbtrackX L1 slf r	33875891	rs2668639	chr17:44324539	C=0.75, T=0.25	3e-13
rs10478336	Edge-level brain connectivity (multivariate analysis)	36800424	rs10478336	chr5:116546192	A=0.722, G=0.278	5e-13
rs57694670	White matter fractional anisotropy x age interaction (2df)	34358307	rs57694670	chr10:105447782	A=0.61, G=0.39	4e-10
rs10840422	White matter microstructure (mean diusivities)	31666681	rs10840422	chr11:10491741	A=0.549, T=0.451	3e-09
rs10840422	IDP dMRI TBSS L1 Splenium of corpus callosum	33875891	rs10840422	chr11:10491741	A=0.549, T=0.451	6e-14
rs242069	Metalloproteinase inhibitor 3 levels	36168886	rs242069	chr22:33241769	C=0.241, T=0.759	2e-20
rs1638525	Platelet count	34594039	rs1638525	chr17:19848594	C=0.394, G=0.606	1e-22
rs55955207	Medial temporal thickness (unadjusted for global measures)	36893272	rs55955207	chr17:44165594	A=0.24, C=0.76	7e-15
rs55955207	Neuroticism	36244801	rs55955207	chr17:44165594	A=0.24, C=0.76	3e-10
rs55955207	Neuroticism	36244801	rs55955207	chr17:44165594	A=0.24, C=0.76	4e-12
rs1264321	Inguinal hernia	34382107	rs1264321	chr6:30859344	A=0.079, G=0.921	3e-08
rs77917260	IDP dMRI TBSS L1 External capsule L	33875891	rs77917260	chr17:44339607	C=0.789, T=0.211	1e-16
rs1870940	Total testosterone levels	32042192	rs1870940	chr1:154984363	A=0.252, G=0.748	5e-17
rs1870940	Total testosterone levels	32042192	rs1870940	chr1:154984363	A=0.252, G=0.748	3e-12
rs1870940	Cancer (pleiotropy)(bidirectional)	32887889	rs1870940	chr1:154984363	A=0.252, G=0.748	2e-07
rs1870940	Basal cell carcinoma	31174203	rs1870940	chr1:154984363	A=0.252, G=0.748	3e-10
rs1870940	Keratinocyte cancer (MTAG)	31174203	rs1870940	chr1:154984363	A=0.252, G=0.748	8e-11
rs1870940	Eczema	30595370	rs1870940	chr1:154984363	A=0.252, G=0.748	3e-08
rs1870940	Electrocardiogram morphology (amplitude at temporal datapoints)	32916098	rs1870940	chr1:154984363	A=0.252, G=0.748	4e-08
rs1870940	Electrocardiogram morphology (amplitude at temporal datapoints)	32916098	rs1870940	chr1:154984363	A=0.252, G=0.748	3e-09
rs1870940	Electrocardiogram morphology (amplitude at temporal datapoints)	32916098	rs1870940	chr1:154984363	A=0.252, G=0.748	2e-09
rs1870940	Electrocardiogram morphology (amplitude at temporal datapoints)	32916098	rs1870940	chr1:154984363	A=0.252, G=0.748	3e-08
rs1870940	Electrocardiogram morphology (amplitude at temporal datapoints)	32916098	rs1870940	chr1:154984363	A=0.252, G=0.748	4e-10
rs13177762	Appendicular lean mass	33097823	rs13177762	chr5:176535206	C=0.859, T=0.141	4e-20
rs1246265	Lifetime smoking index	31689377	rs1246265	chr9:86761745	C=0.702, T=0.298	4e-09
rs1246265	Cannabis smoking or cigarette smoking or schizophrenia	35235886	rs1246265	chr9:86761745	C=0.702, T=0.298	4e-08
rs1246265	Smoking status (ever vs never smokers)	30643258	rs1246265	chr9:86761745	C=0.702, T=0.298	3e-11
rs1246265	Smoking initiation	36477530	rs1246265	chr9:86761745	C=0.702, T=0.298	3e-23
rs11656743	Triglyceride levels	34887591	rs11656743	chr17:65980289	A=0.772, G=0.228	5e-47
rs11656743	Triglyceride levels	34887591	rs11656743	chr17:65980289	A=0.772, G=0.228	3e-31
rs3758575	Periventricular white matter hyperintensities	32517579	rs3758575	chr10:105454881	A=0.513, G=0.487	2e-11
rs7907606	Uterine fibroids	30194396	rs7907606	chr10:105680632	G=0.156, T=0.844	3e-09
rs7907606	Uterine fibroids	31249589	rs7907606	chr10:105680632	G=0.156, T=0.844	2e-16
rs7907606	Basal cell carcinoma	27539887	rs7907606	chr10:105680632	G=0.156, T=0.844	5e-09
rs35997243	High light scatter reticulocyte count	32888494	rs35997243	chr15:63092900	C=0.013, G=0.987	6e-17
rs35997243	High light scatter reticulocyte percentage of red cells	32888494	rs35997243	chr15:63092900	C=0.013, G=0.987	6e-17
rs35997243	Immature fraction of reticulocytes	32888494	rs35997243	chr15:63092900	C=0.013, G=0.987	2e-25
rs35997243	Periventricular white matter hyperintensities	32517579	rs35997243	chr15:63092900	C=0.013, G=0.987	9e-06
rs35997243	High light scatter reticulocyte count	27863252	rs35997243	chr15:63092900	C=0.013, G=0.987	4e-15
rs35997243	Immature fraction of reticulocytes	27863252	rs35997243	chr15:63092900	C=0.013, G=0.987	8e-20
rs35997243	High light scatter reticulocyte percentage of red cells	27863252	rs35997243	chr15:63092900	C=0.013, G=0.987	4e-15
rs3785891	Node-level brain connectivity (multivariate analysis)	36800424	rs3785891	chr17:42990340	C=0.64, T=0.36	3e-10
rs4831174	Pulse pressure	30578418	rs4831174	chr3:115110804	A=0.529, G=0.471	2e-10
rs6979446	White matter microstructure (radial diusivities)	31666681	rs6979446	chr7:55015505	C=0.908, T=0.092	4e-13
rs9267445	Inguinal hernia	34382107	rs9267445	chr6:31483481	C=0.082, G=0.918	5e-09
rs9267445	Microscopic colitis	37768647	rs9267445	chr6:31483481	C=0.082, G=0.918	4e-39
rs7213273	Periventricular white matter hyperintensities	32517579	rs7213273	chr17:43155914	A=0.615, G=0.385	9e-09
rs7213273	Diastolic blood pressure	27618452	rs7213273	chr17:43155914	A=0.615, G=0.385	7e-06
rs7213273	Systolic blood pressure	27618452	rs7213273	chr17:43155914	A=0.615, G=0.385	5e-10
rs7213273	Diastolic blood pressure	35762941	rs7213273	chr17:43155914	A=0.615, G=0.385	4e-16
rs7213273	Insomnia (standard GWA)	37106081	rs7213273	chr17:43155914	A=0.615, G=0.385	3e-08
rs151035694	Platelet count	34469753	rs151035694	chr11:262106	A=0.101, G=0.899	2e-19
rs7211615	Heel bone mineral density	30595370	rs7211615	chr17:79607600	A=0.545, G=0.455	1e-08
rs9608859	Myocardial infarction	33532862	rs9608859	chr22:30667277	C=0.572, T=0.428	8e-07
rs9608859	Corpus callosum mid-anterior volume	37164063	rs9608859	chr22:30667277	C=0.572, T=0.428	4e-09
rs9608859	Corpus callosum volume (MOSTest)	37164063	rs9608859	chr22:30667277	C=0.572, T=0.428	2e-08
rs5756894	White matter microstructure (fractional anisotropy)	31666681	rs5756894	chr22:38450136	A=0.596, C=0.404	3e-08
rs5756894	White matter microstructure (fractional anisotropy)	31666681	rs5756894	chr22:38450136	A=0.596, C=0.404	8e-10
rs5756894	White matter microstructure (fractional anisotropy)	31666681	rs5756894	chr22:38450136	A=0.596, C=0.404	4e-09
rs9379831	Meat-related diet	32066663	rs9379831	chr6:26175852	A=0.328, C=0.672	7e-09
rs9379831	Hip circumference adjusted for BMI	34021172	rs9379831	chr6:26175852	A=0.328, C=0.672	4e-20
rs9379831	Hip circumference adjusted for BMI	34021172	rs9379831	chr6:26175852	A=0.328, C=0.672	2e-09
rs9379831	Multi-trait sex score	37277458	rs9379831	chr6:26175852	A=0.328, C=0.672	4e-13
rs497309	IDP dMRI TBSS MD Sagittal stratum R	33875891	rs497309	chr6:31892484	A=0.926, C=0.074	1e-09
rs497309	IDP dMRI TBSS L1 Sagittal stratum R	33875891	rs497309	chr6:31892484	A=0.926, C=0.074	3e-10
rs497309	TGFBI/VASN protein level ratio	38412862	rs497309	chr6:31892484	A=0.926, C=0.074	4e-29
rs497309	Estimated glomerular filtration rate in diabetes	31451708	rs497309	chr6:31892484	A=0.926, C=0.074	5e-12
rs497309	Inguinal hernia	34382107	rs497309	chr6:31892484	A=0.926, C=0.074	1e-08
rs71597835	IDP dMRI ProbtrackX ICVF ptr l	33875891	rs71597835	chr4:54200100	A=0.308, G=0.692	1e-09
rs73166584	Vertical cup-disc ratio	34077760	rs73166584	chr22:30649229	C=0.842, T=0.158	1e-09
rs4917404	White matter microstructure (radial diusivities)	31666681	rs4917404	chr10:105631126	C=0.522, T=0.478	9e-09
rs7199751	White matter hyperintensity volume x hypertension interaction (2df)	33293549	rs7199751	chr16:86609302	C=0.784, T=0.216	8e-07
rs7199751	White matter hyperintensity volume (adjusted for hypertension)	33293549	rs7199751	chr16:86609302	C=0.784, T=0.216	3e-07
rs7199751	White matter hyperintensity volume	33293549	rs7199751	chr16:86609302	C=0.784, T=0.216	2e-07
rs7199751	White matter hyperintensity volume (adjusted for hypertension)	33293549	rs7199751	chr16:86609302	C=0.784, T=0.216	3e-06
rs7199751	White matter hyperintensity volume	33293549	rs7199751	chr16:86609302	C=0.784, T=0.216	2e-06
rs7199751	Whole brain free water diffusion (multivariate analysis)	35505052	rs7199751	chr16:86609302	C=0.784, T=0.216	1e-16
rs12928520	White matter microstructure (radial diusivities)	31666681	rs12928520	chr16:87237568	C=0.581, T=0.419	2e-10
rs12928520	White matter microstructure (mean diusivities)	31666681	rs12928520	chr16:87237568	C=0.581, T=0.419	2e-10
rs12928520	White matter microstructure (axial diusivities)	31666681	rs12928520	chr16:87237568	C=0.581, T=0.419	9e-10
rs12928520	White matter microstructure (mode of anisotropy)	31666681	rs12928520	chr16:87237568	C=0.581, T=0.419	1e-09
rs12928520	Periventricular white matter hyperintensities	32517579	rs12928520	chr16:87237568	C=0.581, T=0.419	4e-11
rs12928520	Brain region volumes	31676860	rs12928520	chr16:87237568	C=0.581, T=0.419	6e-15
rs12928520	Brain region volumes	31676860	rs12928520	chr16:87237568	C=0.581, T=0.419	3e-12
rs12928520	White matter hyperintensities	32358547	rs12928520	chr16:87237568	C=0.581, T=0.419	1e-13
rs12928520	IDP dMRI TBSS MO Fornix	33875891	rs12928520	chr16:87237568	C=0.581, T=0.419	9e-11
rs12928520	IDP T2 FLAIR BIANCA WMH volume	33875891	rs12928520	chr16:87237568	C=0.581, T=0.419	2e-12
rs7428430	Sunburns	30595370	rs7428430	chr3:50174184	C=0.501, T=0.499	1e-08
rs7428430	Medication use (opioids)	31015401	rs7428430	chr3:50174184	C=0.501, T=0.499	1e-09
rs7428430	Medication use (adrenergics, inhalants)	31015401	rs7428430	chr3:50174184	C=0.501, T=0.499	2e-09
rs7428430	Medication use (opioids)	34594039	rs7428430	chr3:50174184	C=0.501, T=0.499	3e-09
rs7428430	Medication use (adrenergics, inhalants)	34594039	rs7428430	chr3:50174184	C=0.501, T=0.499	1e-10
rs7428430	Hip circumference adjusted for BMI	34021172	rs7428430	chr3:50174184	C=0.501, T=0.499	3e-09
rs7428430	Body mass index	37280435	rs7428430	chr3:50174184	C=0.501, T=0.499	9e-42
rs7650184	rfMRI connectivity (ICA100 edge 387)	33875891	rs7650184	chr3:89530057	A=0.403, C=0.597	1e-35
rs7650184	Brain shape (segment 1)	33821002	rs7650184	chr3:89530057	A=0.403, C=0.597	6e-102
rs7650184	Whole brain free water diffusion (multivariate analysis)	35505052	rs7650184	chr3:89530057	A=0.403, C=0.597	4e-46
rs7650184	Brain rsFMRI measurement (functional connectivity) (Net100_Pair9_29)	35393594	rs7650184	chr3:89530057	A=0.403, C=0.597	4e-50
rs7650184	Cortical surface area	34560273	rs7650184	chr3:89530057	A=0.403, C=0.597	1e-17
rs7650184	Vertex-wise cortical surface area	34910505	rs7650184	chr3:89530057	A=0.403, C=0.597	6e-77
rs9847565	Vertex-wise sulcal depth	34910505	rs9847565	chr3:146369166	C=0.539, G=0.461	5e-11
rs12699999	Brain morphology (min-P)	32665545	rs12699999	chr7:18904264	A=0.626, G=0.374	1e-12
rs12699999	Cortical surface area (min-P)	32665545	rs12699999	chr7:18904264	A=0.626, G=0.374	3e-13
rs10252734	White matter microstructure (fractional anisotropy)	31666681	rs10252734	chr7:81418596	G=0.429, T=0.571	4e-08
rs10252734	Edge-level brain connectivity (multivariate analysis)	36800424	rs10252734	chr7:81418596	G=0.429, T=0.571	3e-12
rs10252734	Cortical surface area	34560273	rs10252734	chr7:81418596	G=0.429, T=0.571	3e-09
rs4128399	Brain region volumes	31676860	rs4128399	chr7:151498679	C=0.156, T=0.844	3e-10
rs4128399	Glaucoma	31959993	rs4128399	chr7:151498679	C=0.156, T=0.844	3e-08
rs4128399	Intraocular pressure	31959993	rs4128399	chr7:151498679	C=0.156, T=0.844	8e-07
rs4128399	Subcortical volume (min-P)	32665545	rs4128399	chr7:151498679	C=0.156, T=0.844	9e-15
rs4128399	Brain morphology (MOSTest)	32665545	rs4128399	chr7:151498679	C=0.156, T=0.844	2e-15
rs4128399	Brain morphology (min-P)	32665545	rs4128399	chr7:151498679	C=0.156, T=0.844	2e-14
rs4128399	aseg global intensity 4th-Ventricle	33875891	rs4128399	chr7:151498679	C=0.156, T=0.844	5e-10
rs4128399	IDP dMRI ProbtrackX ISOVF slf r	33875891	rs4128399	chr7:151498679	C=0.156, T=0.844	3e-09
rs4128399	IDP dMRI ProbtrackX L2 ar l	33875891	rs4128399	chr7:151498679	C=0.156, T=0.844	5e-09
rs4128399	aseg global volume 4th-Ventricle	33875891	rs4128399	chr7:151498679	C=0.156, T=0.844	4e-13
rs4128399	Intraocular pressure	29785010	rs4128399	chr7:151498679	C=0.156, T=0.844	1e-10
rs4128399	Subcortical volume (MOSTest)	32665545	rs4128399	chr7:151498679	C=0.156, T=0.844	1e-13
rs4128399	Primary open angle glaucoma (multi-trait analysis)	37386247	rs4128399	chr7:151498679	C=0.156, T=0.844	3e-08
rs4128399	Whole brain restricted isotropic diffusion (multivariate analysis)	35505052	rs4128399	chr7:151498679	C=0.156, T=0.844	2e-69
rs4128399	Whole brain free water diffusion (multivariate analysis)	35505052	rs4128399	chr7:151498679	C=0.156, T=0.844	2e-59
rs4128399	Whole brain restricted directional diffusion (multivariate analysis)	35505052	rs4128399	chr7:151498679	C=0.156, T=0.844	1e-41
rs4128399	Primary open angle glaucoma (MTAG)	37386247	rs4128399	chr7:151498679	C=0.156, T=0.844	8e-09
rs4128399	Node-level brain connectivity (multivariate analysis)	36800424	rs4128399	chr7:151498679	C=0.156, T=0.844	3e-14
rs4128399	Edge-level brain connectivity (multivariate analysis)	36800424	rs4128399	chr7:151498679	C=0.156, T=0.844	2e-11
rs4128399	Cortical surface area	34560273	rs4128399	chr7:151498679	C=0.156, T=0.844	1e-14
rs4128399	Cortical thickness	34560273	rs4128399	chr7:151498679	C=0.156, T=0.844	1e-17
rs4128399	Vertex-wise sulcal depth	34910505	rs4128399	chr7:151498679	C=0.156, T=0.844	1e-35
rs4128399	Vertex-wise cortical surface area	34910505	rs4128399	chr7:151498679	C=0.156, T=0.844	9e-16
rs4128399	Vertex-wise cortical thickness	34910505	rs4128399	chr7:151498679	C=0.156, T=0.844	4e-31
rs4128399	Brain morphology (MOSTest)	35164939	rs4128399	chr7:151498679	C=0.156, T=0.844	1e-23
rs4128399	T2 brain MRIs Unsupervised Deep learning derived Imaging Phenotypes (dimension 86)	38580839	rs4128399	chr7:151498679	C=0.156, T=0.844	2e-24
rs4128399	Left-hemisphere dorsal attention network to left-hemisphere default mode network white-matter structural connectivity	38438384	rs4128399	chr7:151498679	C=0.156, T=0.844	2e-08
rs4128399	Left-hemisphere control network to left-hemisphere default mode network white-matter structural connectivity	38438384	rs4128399	chr7:151498679	C=0.156, T=0.844	5e-09
rs73313052	Cortical surface area	32193296	rs73313052	chr14:59625997	A=0.13, G=0.87	2e-28
rs73313052	Cortical surface area	32193296	rs73313052	chr14:59625997	A=0.13, G=0.87	6e-36
rs73313052	Cortical surface area	32193296	rs73313052	chr14:59625997	A=0.13, G=0.87	2e-36
rs73313052	Brain region volumes	31676860	rs73313052	chr14:59625997	A=0.13, G=0.87	3e-13
rs73313052	Cortical surface area (visual PC2)	32198502	rs73313052	chr14:59625997	A=0.13, G=0.87	2e-34
rs73313052	Cortical surface area	32963231	rs73313052	chr14:59625997	A=0.13, G=0.87	3e-43
rs73313052	Cortical volume	32963231	rs73313052	chr14:59625997	A=0.13, G=0.87	1e-20
[truncated: 32 more rows]

## Sheet: 8
IVs associated gwas traits in opengwas in reverse MR
SNP	GWAS_Trait	PMID	RS_Number	Position_GRCh37	Alleles	P
rs1162202	Attention deficit hyperactivity disorder or risk-taking behavior (pleiotropy)	38565336	rs1162202	chr16:61966703	C=0.6, T=0.4	1e-09
rs6082363	Attention deficit hyperactivity disorder or risk-taking behavior (pleiotropy)	38565336	rs6082363	chr20:21250843	C=0.706, T=0.294	8e-13
rs2886697	Attention deficit hyperactivity disorder or risk-taking behavior (pleiotropy)	38565336	rs2886697	chr3:20724204	A=0.348, G=0.652	5e-10
rs11255890	Attention deficit hyperactivity disorder or risk-taking behavior (pleiotropy)	38565336	rs11255890	chr10:8784773	A=0.588, C=0.412	4e-10
rs17576773	Attention deficit hyperactivity disorder or risk-taking behavior (pleiotropy)	38565336	rs17576773	chr4:112217523	C=0.88, T=0.12	7e-11
rs115111850	Attention deficit hyperactivity disorder or risk-taking behavior (pleiotropy)	38565336	rs115111850	chr3:43651029	A=0.952, G=0.048	1e-08
rs11596214	Depression	33859377	rs11596214	chr10:106453832	A=0.44, G=0.56	2e-18
rs11596214	General factor of neuroticism	30867560	rs11596214	chr10:106453832	A=0.44, G=0.56	7e-09
rs11596214	Externalizing behaviour (multivariate analysis)	34446935	rs11596214	chr10:106453832	A=0.44, G=0.56	6e-21
rs2025286	Attention deficit hyperactivity disorder or risk-taking behavior (pleiotropy)	38565336	rs2025286	chr6:70858701	A=0.544, C=0.456	2e-09
rs77960	Self-reported math ability (MTAG)	30038396	rs77960	chr5:103964585	A=0.316, G=0.684	2e-11
rs77960	Major depressive disorder (broad)	38177345	rs77960	chr5:103964585	A=0.316, G=0.684	6e-18
rs77960	Chronotype	30696823	rs77960	chr5:103964585	A=0.316, G=0.684	8e-11
rs77960	Body size at age 10	32376654	rs77960	chr5:103964585	A=0.316, G=0.684	2e-12
rs77960	Major depressive disorder or stress-related disorder	34634379	rs77960	chr5:103964585	A=0.316, G=0.684	1e-08
rs77960	Attention deficit hyperactivity disorder or risk-taking behavior (pleiotropy)	38565336	rs77960	chr5:103964585	A=0.316, G=0.684	4e-14
rs10875612	Attention deficit hyperactivity disorder or risk-taking behavior (pleiotropy)	38565336	rs10875612	chr5:144474779	C=0.458, T=0.542	3e-09
rs7844069	Insomnia	35835914	rs7844069	chr8:93277087	G=0.61, T=0.39	3e-11
rs7844069	Attention deficit hyperactivity disorder or risk-taking behavior (pleiotropy)	38565336	rs7844069	chr8:93277087	G=0.61, T=0.39	4e-09
rs76857496	Attention deficit hyperactivity disorder or risk-taking behavior (pleiotropy)	38565336	rs76857496	chr18:5871800	A=0.143, C=0.857	8e-09
rs4916723	Autism spectrum disorder	30804558	rs4916723	chr5:87854395	A=0.586, C=0.414	3e-06
rs4916723	Attention deficit hyperactivity disorder	32606422	rs4916723	chr5:87854395	A=0.586, C=0.414	2e-08
rs4916723	Alcohol consumption (drinks per week) (MTAG)	32451486	rs4916723	chr5:87854395	A=0.586, C=0.414	9e-10
rs4916723	Anorexia nervosa, attention-deficit/hyperactivity disorder, autism spectrum disorder, bipolar disorder, major depression, obsessive-compulsive disorder, schizophrenia, or Tourette syndrome (pleiotropy)	31835028	rs4916723	chr5:87854395	A=0.586, C=0.414	2e-09
rs4916723	Attention deficit hyperactivity disorder or cannabis use	30610198	rs4916723	chr5:87854395	A=0.586, C=0.414	2e-09
rs4916723	Attention deficit hyperactivity disorder	30478444	rs4916723	chr5:87854395	A=0.586, C=0.414	7e-07
rs4916723	Alcohol consumption (drinks per week)	30643258	rs4916723	chr5:87854395	A=0.586, C=0.414	1e-11
rs4916723	Neuroticism	29942085	rs4916723	chr5:87854395	A=0.586, C=0.414	2e-08
rs4916723	Alcohol consumption (drinks per week)	30643251	rs4916723	chr5:87854395	A=0.586, C=0.414	2e-11
rs4916723	Alcohol consumption	31358974	rs4916723	chr5:87854395	A=0.586, C=0.414	2e-10
rs4916723	Major depressive disorder vs autism spectrum disorder (ordinary least squares (OLS))	33686288	rs4916723	chr5:87854395	A=0.586, C=0.414	5e-08
rs4916723	Crisps liking	35585065	rs4916723	chr5:87854395	A=0.586, C=0.414	2e-13
rs4916723	Drinks per week	36477530	rs4916723	chr5:87854395	A=0.586, C=0.414	3e-30
rs4916723	Drinks per week	36477530	rs4916723	chr5:87854395	A=0.586, C=0.414	6e-34
rs4916723	Attention deficit hyperactivity disorder (ADuLT model adjusted for sex)	37689771	rs4916723	chr5:87854395	A=0.586, C=0.414	2e-14
rs4916723	Attention deficit hyperactivity disorder or risk-taking behavior (pleiotropy)	38565336	rs4916723	chr5:87854395	A=0.586, C=0.414	8e-16
rs73145587	Attention deficit hyperactivity disorder or risk-taking behavior (pleiotropy)	38565336	rs73145587	chr7:67685754	A=0.898, T=0.102	3e-08
rs10099100	Autism spectrum disorder	30804558	rs10099100	chr8:10576775	C=0.341, G=0.659	1e-08
rs10099100	Mean corpuscular hemoglobin concentration	32888493	rs10099100	chr8:10576775	C=0.341, G=0.659	3e-14
rs10099100	Autism spectrum disorder (MTAG)	32606422	rs10099100	chr8:10576775	C=0.341, G=0.659	1e-08
rs10099100	Mean corpuscular hemoglobin concentration	32888494	rs10099100	chr8:10576775	C=0.341, G=0.659	4e-13
rs10099100	Autism spectrum disorder	32606422	rs10099100	chr8:10576775	C=0.341, G=0.659	1e-08
rs10099100	Red cell distribution width	30595370	rs10099100	chr8:10576775	C=0.341, G=0.659	1e-12
rs10099100	Mean corpuscular hemoglobin concentration	34594039	rs10099100	chr8:10576775	C=0.341, G=0.659	2e-10
rs910805	Autism spectrum disorder	30804558	rs910805	chr20:21248116	A=0.764, G=0.236	3e-07
rs910805	Autism spectrum disorder (MTAG)	32606422	rs910805	chr20:21248116	A=0.764, G=0.236	1e-10
rs910805	Autism spectrum disorder	32606422	rs910805	chr20:21248116	A=0.764, G=0.236	2e-09
rs910805	Major depressive disorder vs autism spectrum disorder (ordinary least squares (OLS))	33686288	rs910805	chr20:21248116	A=0.764, G=0.236	5e-08
rs2310819	Opioid use disorder (MTAG)	37156939	rs2310819	chr1:66440096	C=0.469, T=0.531	1e-12
rs2310819	Cannabis use disorder (MTAG)	37156939	rs2310819	chr1:66440096	C=0.469, T=0.531	1e-16
rs2310819	Alcohol use disorder (MTAG)	37156939	rs2310819	chr1:66440096	C=0.469, T=0.531	1e-14
rs2310819	Smoking initiation (MTAG)	37156939	rs2310819	chr1:66440096	C=0.469, T=0.531	7e-19
rs7531138	Schizophrenia	35396580	rs7531138	chr1:97923499	A=0.481, T=0.519	2e-08
rs7531138	Educational attainment	35361970	rs7531138	chr1:97923499	A=0.481, T=0.519	2e-11
rs35942385	Alcohol use disorder (consumption score)	37282553	rs35942385	chr2:144208523	G=0.643, T=0.357	8e-10
rs35942385	Opioid use disorder (MTAG)	37156939	rs35942385	chr2:144208523	G=0.643, T=0.357	3e-08
rs57761252	Educational attainment	35361970	rs57761252	chr2:161865998	A=0.21, G=0.79	5e-21
rs13146907	Alcohol use disorder (consumption score)	37282553	rs13146907	chr4:39425248	A=0.626, G=0.374	2e-16
rs13146907	Alcohol use disorder (consumption score)	37282553	rs13146907	chr4:39425248	A=0.626, G=0.374	2e-14
rs1229984	High light scatter reticulocyte count	32888494	rs1229984	chr4:100239319	C=0.971, T=0.029	6e-12
rs1229984	Systolic blood pressure	30595370	rs1229984	chr4:100239319	C=0.971, T=0.029	6e-13
rs1229984	High light scatter reticulocyte percentage of red cells	32888494	rs1229984	chr4:100239319	C=0.971, T=0.029	2e-10
rs1229984	Alcohol consumption	23743675	rs1229984	chr4:100239319	C=0.971, T=0.029	2e-08
rs1229984	Esophageal cancer	19698717	rs1229984	chr4:100239319	C=0.971, T=0.029	8e-24
rs1229984	Immature fraction of reticulocytes	32888494	rs1229984	chr4:100239319	C=0.971, T=0.029	1e-10
rs1229984	Alcohol use disorder	32451486	rs1229984	chr4:100239319	C=0.971, T=0.029	3e-107
rs1229984	Problematic alcohol use	32451486	rs1229984	chr4:100239319	C=0.971, T=0.029	3e-107
rs1229984	Problematic alcohol use (MTAG)	32451486	rs1229984	chr4:100239319	C=0.971, T=0.029	6e-267
rs1229984	Alcohol consumption (drinks per week) (MTAG)	32451486	rs1229984	chr4:100239319	C=0.971, T=0.029	7e-280
rs1229984	Oral cavity and pharyngeal cancer	21437268	rs1229984	chr4:100239319	C=0.971, T=0.029	1e-20
rs1229984	Alcohol dependence	23456092	rs1229984	chr4:100239319	C=0.971, T=0.029	3e-21
rs1229984	Relative fat intake	32393786	rs1229984	chr4:100239319	C=0.971, T=0.029	1e-28
rs1229984	Relative protein intake	32393786	rs1229984	chr4:100239319	C=0.971, T=0.029	9e-07
rs1229984	LDL cholesterol levels	32203549	rs1229984	chr4:100239319	C=0.971, T=0.029	7e-17
rs1229984	Apolipoprotein B levels	32203549	rs1229984	chr4:100239319	C=0.971, T=0.029	8e-10
rs1229984	Heel bone mineral density	30598549	rs1229984	chr4:100239319	C=0.971, T=0.029	6e-09
rs1229984	Low density lipoprotein cholesterol levels	32154731	rs1229984	chr4:100239319	C=0.971, T=0.029	1e-20
rs1229984	Pulse pressure	28135244	rs1229984	chr4:100239319	C=0.971, T=0.029	5e-07
rs1229984	Alcohol consumption (drinks per week)	28485404	rs1229984	chr4:100239319	C=0.971, T=0.029	3e-32
rs1229984	Alcohol consumption (drinks per week)	28485404	rs1229984	chr4:100239319	C=0.971, T=0.029	3e-06
rs1229984	Alcohol consumption (drinkers vs non-drinkers)	28485404	rs1229984	chr4:100239319	C=0.971, T=0.029	2e-20
rs1229984	Alcohol consumption (drinkers vs non-drinkers)	28485404	rs1229984	chr4:100239319	C=0.971, T=0.029	4e-07
rs1229984	Alcohol use disorder (consumption score)	30336701	rs1229984	chr4:100239319	C=0.971, T=0.029	4e-56
rs1229984	Alcohol use disorder (dependence and problematic use scores)	30336701	rs1229984	chr4:100239319	C=0.971, T=0.029	1e-45
rs1229984	Total testosterone levels	32042192	rs1229984	chr4:100239319	C=0.971, T=0.029	1e-08
rs1229984	Reticulocyte count	32888494	rs1229984	chr4:100239319	C=0.971, T=0.029	4e-09
rs1229984	Bitter alcoholic beverage consumption	31046077	rs1229984	chr4:100239319	C=0.971, T=0.029	2e-140
rs1229984	Aerodigestive squamous cell cancer (pleiotropy)	33667223	rs1229984	chr4:100239319	C=0.971, T=0.029	2e-09
rs1229984	Alcohol dependence	31090166	rs1229984	chr4:100239319	C=0.971, T=0.029	5e-09
rs1229984	Alcohol dependence symptom count	31090166	rs1229984	chr4:100239319	C=0.971, T=0.029	4e-10
rs1229984	Alcohol dependence (tolerance)	31090166	rs1229984	chr4:100239319	C=0.971, T=0.029	1e-09
rs1229984	Alcohol dependence (desire to cut drinking)	31090166	rs1229984	chr4:100239319	C=0.971, T=0.029	1e-17
rs1229984	Serum 25-Hydroxyvitamin D levels	32242144	rs1229984	chr4:100239319	C=0.971, T=0.029	5e-10
rs1229984	Alcohol use disorder (consumption score)	33861876	rs1229984	chr4:100239319	C=0.971, T=0.029	2e-65
rs1229984	Gout vs asymptomatic hyperuricemia	33832965	rs1229984	chr4:100239319	C=0.971, T=0.029	1e-15
rs1229984	Gout	33832965	rs1229984	chr4:100239319	C=0.971, T=0.029	5e-23
rs1229984	Body mass index	28892062	rs1229984	chr4:100239319	C=0.971, T=0.029	1e-07
rs1229984	Alcohol dependence	24166409	rs1229984	chr4:100239319	C=0.971, T=0.029	2e-22
rs1229984	Alcohol dependence	24166409	rs1229984	chr4:100239319	C=0.971, T=0.029	2e-23
rs1229984	Alcohol dependence	24166409	rs1229984	chr4:100239319	C=0.971, T=0.029	1e-31
rs1229984	Oral cavity and pharyngeal cancer	27749845	rs1229984	chr4:100239319	C=0.971, T=0.029	2e-15
rs1229984	Oropharynx cancer	27749845	rs1229984	chr4:100239319	C=0.971, T=0.029	9e-09
rs1229984	Oral cavity cancer	27749845	rs1229984	chr4:100239319	C=0.971, T=0.029	1e-09
rs1229984	Body mass index	30595370	rs1229984	chr4:100239319	C=0.971, T=0.029	1e-12
rs1229984	Alcohol consumption (drinks per week)	30679032	rs1229984	chr4:100239319	C=0.971, T=0.029	2e-173
rs1229984	Maximum habitual alcohol consumption	31151762	rs1229984	chr4:100239319	C=0.971, T=0.029	1e-49
rs1229984	Maximum habitual alcohol consumption	31151762	rs1229984	chr4:100239319	C=0.971, T=0.029	5e-47
rs1229984	Blood urea nitrogen levels	31152163	rs1229984	chr4:100239319	C=0.971, T=0.029	1e-08
rs1229984	Total cholesterol levels	33462484	rs1229984	chr4:100239319	C=0.971, T=0.029	1e-16
rs1229984	Liver enzyme levels (gamma-glutamyl transferase)	33972514	rs1229984	chr4:100239319	C=0.971, T=0.029	2e-14
rs1229984	Apolipoprotein B levels	33462484	rs1229984	chr4:100239319	C=0.971, T=0.029	3e-13
rs1229984	Serum albumin levels	33462484	rs1229984	chr4:100239319	C=0.971, T=0.029	6e-12
rs1229984	Serum alkaline phosphatase levels	33462484	rs1229984	chr4:100239319	C=0.971, T=0.029	1e-24
rs1229984	Urea levels	33462484	rs1229984	chr4:100239319	C=0.971, T=0.029	2e-23
rs1229984	Vitamin D levels	33462484	rs1229984	chr4:100239319	C=0.971, T=0.029	4e-09
rs1229984	Heel bone mineral density	30595370	rs1229984	chr4:100239319	C=0.971, T=0.029	4e-08
rs1229984	Predicted visceral adipose tissue	31501611	rs1229984	chr4:100239319	C=0.971, T=0.029	3e-09
rs1229984	Risk-taking tendency (4-domain principal component model)	30643258	rs1229984	chr4:100239319	C=0.971, T=0.029	4e-22
rs1229984	Alcohol consumption (drinks per week)	30643258	rs1229984	chr4:100239319	C=0.971, T=0.029	8e-202
rs1229984	Regular attendance at a pub or social club	29970889	rs1229984	chr4:100239319	C=0.971, T=0.029	4e-25
rs1229984	Urinary sodium excretion	31409800	rs1229984	chr4:100239319	C=0.971, T=0.029	2e-10
rs1229984	Cardiovascular disease	30595370	rs1229984	chr4:100239319	C=0.971, T=0.029	8e-15
rs1229984	Serum 25-Hydroxyvitamin D levels	32059762	rs1229984	chr4:100239319	C=0.971, T=0.029	5e-13
rs1229984	Mean corpuscular hemoglobin	30595370	rs1229984	chr4:100239319	C=0.971, T=0.029	2e-18
rs1229984	Alcohol consumption (drinks per week)	31959922	rs1229984	chr4:100239319	C=0.971, T=0.029	4e-19
rs1229984	Alcohol consumption (drinkers vs non-drinkers)	31959922	rs1229984	chr4:100239319	C=0.971, T=0.029	2e-72
rs1229984	Red blood cell count	30595370	rs1229984	chr4:100239319	C=0.971, T=0.029	7e-12
rs1229984	Alcohol consumption (heavy vs. light/non-drinkers)	31998841	rs1229984	chr4:100239319	C=0.971, T=0.029	2e-66
rs1229984	Alcohol use disorder (consumption score)	30940813	rs1229984	chr4:100239319	C=0.971, T=0.029	5e-102
rs1229984	Alcohol use disorder (consumption score)	30940813	rs1229984	chr4:100239319	C=0.971, T=0.029	1e-19
rs1229984	Alcohol use disorder (consumption score)	30940813	rs1229984	chr4:100239319	C=0.971, T=0.029	4e-16
rs1229984	Alcohol use disorder (consumption score)	30940813	rs1229984	chr4:100239319	C=0.971, T=0.029	4e-133
rs1229984	Alcohol use disorder	30940813	rs1229984	chr4:100239319	C=0.971, T=0.029	5e-74
rs1229984	Alcohol use disorder	30940813	rs1229984	chr4:100239319	C=0.971, T=0.029	6e-17
rs1229984	Alcohol use disorder	30940813	rs1229984	chr4:100239319	C=0.971, T=0.029	5e-85
rs1229984	Esophageal cancer	32514122	rs1229984	chr4:100239319	C=0.971, T=0.029	3e-44
rs1229984	Alcohol consumption (drinks per week)	30643251	rs1229984	chr4:100239319	C=0.971, T=0.029	2e-308
rs1229984	Ratio of saturated fatty acids to total fatty acids	35213538	rs1229984	chr4:100239319	C=0.971, T=0.029	4e-32
rs1229984	Esophageal cancer	34594039	rs1229984	chr4:100239319	C=0.971, T=0.029	2e-46
rs1229984	Esophageal cancer	34594039	rs1229984	chr4:100239319	C=0.971, T=0.029	3e-45
rs1229984	Blood urea nitrogen levels	34594039	rs1229984	chr4:100239319	C=0.971, T=0.029	3e-16
rs1229984	Estimated glomerular filtration rate (creatinine)	35710981	rs1229984	chr4:100239319	C=0.971, T=0.029	2e-09
rs1229984	Weight	34594039	rs1229984	chr4:100239319	C=0.971, T=0.029	5e-10
rs1229984	Alcohol use disorder	35094024	rs1229984	chr4:100239319	C=0.971, T=0.029	3e-17
rs1229984	Urinary sodium excretion	33462484	rs1229984	chr4:100239319	C=0.971, T=0.029	1e-09
rs1229984	Low density lipoprotein cholesterol levels	33462484	rs1229984	chr4:100239319	C=0.971, T=0.029	3e-23
rs1229984	Insulin-like growth factor 1 levels	33462484	rs1229984	chr4:100239319	C=0.971, T=0.029	3e-32
rs1229984	Alanine aminotransferase levels	35810165	rs1229984	chr4:100239319	C=0.971, T=0.029	1e-14
rs1229984	Serum total protein levels	33462484	rs1229984	chr4:100239319	C=0.971, T=0.029	1e-17
rs1229984	Urate levels	33462484	rs1229984	chr4:100239319	C=0.971, T=0.029	5e-19
rs1229984	Cholesteryl esters to total lipids ratio in large LDL	35213538	rs1229984	chr4:100239319	C=0.971, T=0.029	3e-09
rs1229984	Phospholipids to total lipids ratio in large LDL	35213538	rs1229984	chr4:100239319	C=0.971, T=0.029	8e-13
rs1229984	Adult body size	32376654	rs1229984	chr4:100239319	C=0.971, T=0.029	3e-08
rs1229984	Oropharynx cancer and human papilloma virus 16 negative oropharyngeal cancer	34642315	rs1229984	chr4:100239319	C=0.971, T=0.029	4e-08
rs1229984	Daily alcohol intake in rs671 GG genotype	38277453	rs1229984	chr4:100239319	C=0.971, T=0.029	6e-39
rs1229984	Alcohol drinking status in rs671 GG genotype	38277453	rs1229984	chr4:100239319	C=0.971, T=0.029	2e-24
rs1229984	Alcohol drinking status (ever drinker vs never drinker)	38277453	rs1229984	chr4:100239319	C=0.971, T=0.029	2e-73
rs1229984	Daily alcohol intake in rs671 GA genotype	38277453	rs1229984	chr4:100239319	C=0.971, T=0.029	3e-101
rs1229984	Alcohol drinking status in rs671 GA genotype	38277453	rs1229984	chr4:100239319	C=0.971, T=0.029	4e-86
rs1229984	Daily alcohol intake x rs671 interaction (2df)	38277453	rs1229984	chr4:100239319	C=0.971, T=0.029	3e-95
rs1229984	Alcohol drinking status x rs671 interaction (2df)	38277453	rs1229984	chr4:100239319	C=0.971, T=0.029	7e-100
rs1229984	Daily alcohol intake	38277453	rs1229984	chr4:100239319	C=0.971, T=0.029	6e-91
rs1229984	Bitter ale liking	35585065	rs1229984	chr4:100239319	C=0.971, T=0.029	5e-09
rs1229984	F-wine liking (derived food-liking factor)	35585065	rs1229984	chr4:100239319	C=0.971, T=0.029	2e-42
rs1229984	Alcohol liking	35585065	rs1229984	chr4:100239319	C=0.971, T=0.029	3e-27
rs1229984	Lager liking	35585065	rs1229984	chr4:100239319	C=0.971, T=0.029	5e-09
rs1229984	F-coffee/alcohol liking (derived food-liking factor)	35585065	rs1229984	chr4:100239319	C=0.971, T=0.029	6e-14
rs1229984	Gamma glutamyl transpeptidase	34594039	rs1229984	chr4:100239319	C=0.971, T=0.029	1e-09
rs1229984	Ratio of saturated fatty acids to total fatty acids	38448586	rs1229984	chr4:100239319	C=0.971, T=0.029	8e-13
rs1229984	Body mass index	34594039	rs1229984	chr4:100239319	C=0.971, T=0.029	5e-17
rs1229984	Systolic blood pressure	38689001	rs1229984	chr4:100239319	C=0.971, T=0.029	2e-11
rs1229984	Pulse pressure	38689001	rs1229984	chr4:100239319	C=0.971, T=0.029	4e-17
rs1229984	Ideal cardiovascular health score (clinical and behavioral)	35613103	rs1229984	chr4:100239319	C=0.971, T=0.029	2e-09
rs1229984	Non-HDL cholesterol levels	34887591	rs1229984	chr4:100239319	C=0.971, T=0.029	3e-14
[truncated: 824 more rows]

## Sheet: 9
Confounders' selection of IVs
[truncated: 837 more rows]

## Sheet: 10
IVs in forward MR without confounders
[truncated: 1,377 more rows]

## Sheet: 11
Outliers detected by MR-PRESSO in forward MR analyses.
[truncated: 351 more rows]

[truncated: 14 more sheets: 12, 13, 14, 15, 16, 17, 19, 18, 20, 21, 22, 23, 24, 25]
